# Supplementary material
Source: PubMed Central journal article supplement (PMC3233820)
Supplement: suppmat.pdf [file suppmat.pdf]

## Results:

**Table S1:** Genotype and time point gene expression comparison. Only genes with known symbols are represented.

| GLY 3 months X GLY 6 months comparison |                                       |                       | ARG 3 months X ARG 6 months comparison |                                       |                       | All genotypes/time points |
|----------------------------------------|---------------------------------------|-----------------------|----------------------------------------|---------------------------------------|-----------------------|---------------------------|
| Uniquely Up-regulated in GLY 6 months  | Uniquely Up-regulated in GLY 3 months | Commonly Up-regulated | Uniquely Up-regulated in ARG 6 months  | Uniquely Up-regulated in ARG 3 months | Commonly Up-regulated | Commonly Up-regulated     |
| A4galt                                 | Aass                                  | Abca1                 | A4galt                                 | Aars                                  | Abhd2                 | Acta2                     |
| Abca8a                                 | Ablim2                                | Acp5                  | Aacs                                   | Abra                                  | Acp5                  | Ang                       |
| Abca9                                  | Acer2                                 | Acta2                 | Abca1                                  | Acox2                                 | Acta2                 | Anxa1                     |
| Abcb1b                                 | Adamts12                              | Adrbk2                | Abca8a                                 | Adamts4                               | Adamts2               | Apoe                      |
| Abcc3                                  | Adrb2                                 | Ang                   | Abca9                                  | Adamts9                               | Agap1                 | Armxc3                    |
| Abhd2                                  | Aldh1b1                               | Anxa1                 | Abcc3                                  | Adap2                                 | Akap2                 | Aspn                      |
| Abi1                                   | Alpk2                                 | Ap3s1                 | Abi1                                   | Adrbk2                                | Alcam                 | Atp10a                    |
| Abi3bp                                 | Amy1                                  | Apoe                  | Abi2                                   | Alg10b                                | Aldh18a1              | Atrnl1                    |
| Acaca                                  | Amy2a1                                | Aqp4                  | Abi3bp                                 | Alg8                                  | Aldh1a2               | Bmp2                      |
| Ace                                    | Amy2a5                                | Armxc3                | Acaca                                  | Amigo2                                | Ammecr1               | C1qb                      |
| Acp2                                   | Angptl1                               | Aspn                  | Acap2                                  | Amy1                                  | Ang                   | C1s                       |
| Acs14                                  | Arl11                                 | Atp10a                | Acbd3                                  | Ap1g2                                 | Anxa1                 | C3                        |
| Acs15                                  | Arntl                                 | Atrnl1                | Ace                                    | Aqp4                                  | Anxa2                 | C4b                       |
| Actn1                                  | Arsa                                  | Bmp2                  | Acot9                                  | Arntl                                 | Anxa4                 | C7                        |
| Actn4                                  | Atg4a                                 | C1qb                  | Acp2                                   | Atf4                                  | Apobec1               | Ccl6                      |
| Adam15                                 | B3gnt1                                | C1r                   | Acs14                                  | Atf5                                  | Apod                  | Ccl9                      |
| Adam8                                  | Bhlhe40                               | C1s                   | Acs15                                  | Atg4a                                 | Apoe                  | Cd109                     |
| Adam9                                  | Ccnd3                                 | C3                    | Actb                                   | Atp8b4                                | Arhgdig               | Cd24a                     |
| Adamts10                               | Ccrn4l                                | C4b                   | Actg1                                  | B4galt7                               | Armxc3                | Cd53                      |
| Adamts2                                | Cdkn1a                                | C6                    | Actn1                                  | Bcl3                                  | Armet                 | Col3a1                    |
| Adamts20                               | Cdkn2c                                | C7                    | Actn4                                  | Bloc1s3                               | Arpc1b                | Creld2                    |
| Adamts5                                | Cdv3                                  | Cbr2                  | Actr3                                  | Bves                                  | Arpc3                 | Csf1r                     |
| Adamts12                               | Cfl1                                  | Ccl6                  | Acvr1                                  | Car2                                  | Arpc4                 | Ctss                      |
| Adamts13                               | Cml1                                  | Ccl9                  | Acvr1                                  | Cars                                  | Arrb1                 | Dct                       |
| Adcy7                                  | Corin                                 | Cd109                 | Adam10                                 | Ccnd3                                 | Aspn                  | Disp1                     |
| Adora2b                                | Cuzd1                                 | Cd24a                 | Adam19                                 | Ccr2                                  | Atp10a                | Emr1                      |
| Aebp1                                  | Cxcl1                                 | Cd53                  | Adam8                                  | Cdca7                                 | Atrnl1                | Fcgr2b                    |
| Aff2                                   | Cyb5r4                                | Cdh22                 | Adam9                                  | Cdh22                                 | Axl                   | Fgl2                      |
| Aff3                                   | Cyp2d10                               | Cdo1                  | Adamts10                               | Cdkn1a                                | Azin1                 | Fhl1                      |
| Agfg2                                  | Defa5                                 | Cenpf                 | Adamts12                               | Cdo1                                  | B4galt5               | Gda                       |
| Ahnak2                                 | Dkk1                                  | Cep192                | Adamts20                               | Cenpf                                 | Baspl                 | Gfpt2                     |
| Ahsg                                   | Dock8                                 | Col3a1                | Adamts5                                | Cenpl                                 | Bcat1                 | Gpr133                    |
| Akap13                                 | Dppa5a                                | Creld2                | Adamts12                               | Ch25h                                 | Bmp2                  | Gpr65                     |
| Akap2                                  | Dsg1b                                 | Csf1r                 | Adamts13                               | Clea1                                 | C1qa                  | Gpx1                      |
| Akna                                   | Ear6                                  | Csf2ra                | Adar                                   | Clec5a                                | C1qb                  | Gpx3                      |
| Akr1b8                                 | Egln3                                 | Ctnnal1               | Adcy3                                  | Cops3                                 | C1qtnf6               | Grin2c                    |
| Alcam                                  | Elk1                                  | Ctss                  | Adcy7                                  | Cst9                                  | C1s                   | Grk5                      |
| Aldh18a1                               | Ephx3                                 | Dct                   | Adss                                   | Ctnnal1                               | C3                    | Hexb                      |
| Aldh1a1                                | Eppk1                                 | Disp1                 | Adssl1                                 | Ctsl                                  | C4a                   | Hsp90aa1                  |
| Aldh1a2                                | Erich1                                | Dpp6                  | Aebp1                                  | Diap3                                 | C4b                   | Iah1                      |
| Alox5ap                                | F8                                    | Dusp5                 | Aff2                                   | Dkk1                                  | C5ar1                 | Ifi205                    |
| Alpk1                                  | Fam122b                               | Ecm1                  | Aff3                                   | Dph5                                  | C7                    | Il6ra                     |
| Ammecr1                                | Fam124a                               | Emr1                  | Agfg2                                  | Dyrk2                                 | Cab39l                | Itga11                    |
| Angptl7                                | Fam178b                               | Ero1lb                | Ahnak2                                 | Eef1e1                                | Camkk1                | Itgb2                     |
| Ankfy1                                 | Fam46a                                | Fam102b               | Ahsg                                   | Efs                                   | Camkk2                | Lilrb3                    |
| Ankrd1                                 | Fam50b                                | Fam168a               | Aida                                   | Elfn1                                 | Cand1                 | Lipa                      |
| Ankrd13a                               | Fbxo8                                 | Fcgr2b                | Aif1                                   | Enkur                                 | Capg                  | Lyz1                      |
| Ankrd27                                | Fgf11                                 | Fgl2                  | Akap13                                 | Fam117b                               | Car13                 | Lyz2                      |
| Ano6                                   | Fstl4                                 | Fhl1                  | Akna                                   | Fam178b                               | Cask                  | Maged2                    |
| Anpep                                  | Furin                                 | Ftl1                  | Akr1b8                                 | Fcf1                                  | Ccdc80                | Man1a                     |
| Antxr1                                 | Gabrg3                                | Ftl2                  | Akt3                                   | Fgf18                                 | Ccdc88a               | Mfap5                     |
| Anxa2                                  | Galns                                 | Gda                   | Aldh1a1                                | Fgfr3                                 | Ccl6                  | Mmp12                     |
| Anxa3                                  | Galnt2                                | Gfpt2                 | Aldh1a7                                | Filip11                               | Ccl9                  | Mpeg1                     |
| Anxa4                                  | Gas1                                  | Gm2a                  | Aldh3b1                                | Fkbp5                                 | Ccr11                 | Mrc1                      |
| Anxa5                                  | Gats12                                | Gpr133                | Alg14                                  | Fstl4                                 | Cd109                 | Ms4a6c                    |
| Anxa8                                  | Gene                                  | Gpr65                 | Alox5ap                                | Fuz                                   | Cd24a                 | Mt2                       |
| Aoah                                   | Gm628                                 | Gpx1                  | Alpk1                                  | Galnt2                                | Cd44                  | Myh7                      |
| Aoc3                                   | Gnpnat1                               | Gpx3                  | Angptl7                                | Gats12                                | Cd47                  | Nubp1                     |
| Ap1s2                                  | Golga4                                | Grin2c                | Ankfy1                                 | Glt8d3                                | Cd48                  | Nupr1                     |
| Ap2b1                                  | Gpr158                                | Grk5                  | Ankrd1                                 | Gnpnat1                               | Cd53                  | Olfml2b                   |

|           |           |           |           |           |         |           |
|-----------|-----------|-----------|-----------|-----------|---------|-----------|
| Ap3b1     | Gpx2      | H2-Eb1    | Ankrd13a  | Golga4    | Cd55    | Osmr      |
| Apaf1     | Gpx8      | H2-T10    | Ankrd27   | Gpatch4   | Cd68    | P2ry6     |
| Apba1     | H2-Ea     | Hal       | Anln      | Gpr158    | Cd84    | Pam       |
| Apbb1ip   | Hand2     | Hcn1      | Ano6      | Grm1      | Cdv3    | Pde3b     |
| Apcdd1    | Hhipl1    | Hexb      | Anp32b    | Grpel2    | Cebpg   | Pfkip     |
| Aph1b     | Hist1h1c  | Hfe       | Anpep     | Hal       | Cenpt   | Phka1     |
| Apobec1   | Hist1h2ao | Hpse      | Antxr1    | Hand2     | Cercam  | Pira2     |
| Apod      | Hist1h2bc | Hsp90aa1  | Anxa3     | Hcfc2     | Cfl1    | Plcb4     |
| App       | Hist1h3d  | Iah1      | Anxa5     | Hecw2     | Chpf    | Prss23    |
| Arap1     | Hlx       | Ifi205    | Anxa7     | Hist1h2ao | Clcn5   | Ptprj     |
| Arf3      | Hras1     | Ifi2711   | Anxa8     | Hist1h2bc | Clec12a | Rab3ip    |
| Arf4      | Ifnb1     | I10ra     | Aoah      | Hist1h3d  | Clec3b  | Rabgap11  |
| Arf6      | Inhbb     | I16ra     | Aoc3      | Hmcn2     | Clec4d  | Rad5111   |
| Arfgap3   | Inmt      | Irak3     | Ap2b1     | Hpcal1    | Cmklr1  | Rtn4      |
| Arfip1    | Itfg3     | Itga11    | Ap3b1     | Hspa2     | Col14a1 | Serpina3h |
| Arhgap1   | Krt80     | Itgb2     | Ap3s1     | Hsph1     | Col16a1 | Serpina3n |
| Arhgap11a | Lad1      | Lgals3bp  | Apaf1     | Hyal2     | Col1a1  | Serpine2  |
| Arhgap25  | Lman11    | Lilrb3    | Apba1     | Inhbb     | Col1a2  | Sh3d19    |
| Arhgap30  | Lpar3     | Lipa      | Apbb1ip   | Ins1      | Col3a1  | Stxbp2    |
| Arhgef12  | Lrp2bp    | Lpcat2    | Apc       | Irf8      | Col4a1  | Sulf2     |
| Arhgef2   | Lrrc52    | Ly6a      | Apcdd1    | Klhl2     | Col4a2  | Tbxas1    |
| Arid5b    | Mab2112   | Lyz1      | Aph1b     | Lad1      | Col5a1  | Timp2     |
| Arl13b    | Map1lc3a  | Lyz2      | Apobec3   | Lair1     | Col6a2  | Tmed3     |
| Arl4c     | Mapk10    | Mafb      | App       | Lcn2      | Col6a3  | Tmem100   |
| Arl8a     | Mapk4     | Maged2    | App11     | Lcp2      | Cpne8   | Tmem176a  |
| Armxc2    | Mapkapk2  | Man1a     | Ar        | Lpin3     | Creld2  | Tspo      |
| Armet     | Max       | Mfap5     | Arap1     | Lrrc52    | Csf1r   | Tyrobp    |
| Arpc1b    | Mctp1     | Mif       | Arf3      | Mak10     | Ctsh    | Uap1      |
| Arpc3     | Mea1      | Mmp12     | Arf4      | Map3k6    | Ctss    | Vsig4     |
| Arrb1     | Mgat1     | Mpeg1     | Arf6      | Mapk4     | Cx3cr1  | Wdr32     |
| Arrb2     | Mrpl19    | Mrc1      | Arfgap3   | Max       | Cxcl16  |           |
| Arrdc4    | Mrpl20    | Ms4a6c    | Arfip1    | Mctp1     | Cyb561  |           |
| Arsb      | Mstn      | Mt2       | Arhgap1   | Mgat4b    | Cyb5r3  |           |
| Asah1     | Mt1       | Myh7      | Arhgap11a | Mrm1      | Cybb    |           |
| Asl       | N4bp211   | Naaa      | Arhgap22  | Ms4a4d    | Cyp1b1  |           |
| Asns      | Napepld   | Ncf4      | Arhgap25  | Mt1       | Cyth4   |           |
| Ass1      | Neil2     | Ndrg4     | Arhgap30  | Myd116    | Dab2    |           |
| Atf4      | Ninj1     | Nfil3     | Arhgdia   | N4bp211   | Dagla   |           |
| Atl3      | Nle1      | Nubp1     | Arhgdib   | Ncf4      | Dap     |           |
| Atp1b3    | Nr2f6     | Nupr1     | Arhgef2   | Nid2      | Dbn1    |           |
| Atp2b4    | Nudt4     | Olfml2b   | Arhgef5   | Nme5      | Dct     |           |
| Atp6ap2   | Nup62     | Osmr      | Arid5b    | Nr2f6     | Ddr2    |           |
| Atp6v0a4  | Osr1      | P2ry6     | Arih1     | Nudcd1    | Dennd4a |           |
| Atp6v0b   | Pacrg     | Pam       | Arl13b    | Nudt4     | Derl3   |           |
| Atp6v1a   | Pcgf5     | Pde3b     | Arl4c     | Nup62     | Disp1   |           |
| Atp6v1h   | Pctp      | Pfkip     | Arl5a     | Nxt1      | Dock2   |           |
| Atp7a     | Pde1c     | Pgam1     | Arl8a     | Opalin    | Dock8   |           |
| Atp8b1    | Pde3a     | Phka1     | Armxc2    | Pacrg     | Dok5    |           |
| Atp8b2    | Pdzd2     | Phlda3    | Arrb2     | Pdpk1     | Dtx4    |           |
| Axl       | Pgrmc1    | Pira2     | Arsa      | Pdzd2     | Dzip3   |           |
| B2m       | Phkg1     | Plcb4     | Arsb      | Peli3     | Edem1   |           |
| B4galnt1  | Pigq      | Pnp2      | Asah1     | Pgf       | Efemp2  |           |
| B4galt5   | Pipox     | Prss23    | Asah2     | Pgrmc1    | Eid1    |           |
| Bace2     | Pla2g5    | Ptprj     | Ascc3     | Phyhip    | Eln     |           |
| Baiap2    | Ppcs      | Rab3ip    | Asl       | Pnp2      | Elov11  |           |
| Baz1a     | Ppp1r14b  | Rabgap11  | Asns      | Ppap2a    | Emr1    |           |
| Bcr       | Ppp2r5b   | Rad5111   | Aspser1   | Ppil6     | Entpd1  |           |
| Bgn       | Pramel5   | Rtn4      | Ass1      | Ptgr1     | Entpd2  |           |
| Bicc1     | Prex1     | Sec11c    | Atad2     | Ptprd     | Eps8    |           |
| Bin3      | Prps2     | Serpina3c | Atg7      | Qprt      | Fads1   |           |
| Birc3     | Ptp4a3    | Serpina3h | Athl1     | Rab13     | Fam105a |           |
| Bmp1      | Ptprd     | Serpina3n | Atl3      | Rab27a    | Fam122b |           |
| Bmp2k     | Ras110a   | Serpine2  | Atoh1     | Rap2a     | Fam46a  |           |
| Bmper     | Rdh7      | Serpig1   | Atp13a3   | Rasgef1b  | Fbln1   |           |
| Bnc2      | Rfx2      | Sh3d19    | Atp1b3    | Rfxank    | Fbln2   |           |
| Boc       | Rgma      | Sh3gl2    | Atp2b4    | Rgs2      | Fbn1    |           |
| C1qa      | Rgnef     | Shroom3   | Atp6ap2   | Rp1       | Fcer1g  |           |
| C1qc      | Rgs2      | Slc25a5   | Atp6v0a4  | Rtn4r11   | Fcgr1   |           |
| C1qtnf6   | Rgs6      | Slc37a2   | Atp6v0d2  | S1pr1     | Fcgr2b  |           |

|          |           |          |           |           |            |  |
|----------|-----------|----------|-----------|-----------|------------|--|
| C3ar1    | Rilp12    | Slc9a9   | Atp6v1a   | Scn2a1    | Fgd2       |  |
| C4a      | Rnu7      | Slco2b1  | Atp6v1h   | Sec22b    | Fgl2       |  |
| C5ar1    | Rock2     | Slit3    | Atp7a     | Sema3f    | Fhl1       |  |
| Cab39l   | Rp1       | Stxbp2   | Atp8b1    | Sema4a    | Fn1        |  |
| Cachd1   | Rpp25     | Sulf2    | Atp8b2    | Sema6b    | Fstl1      |  |
| Cacna1a  | Rps4y2    | Tbxas1   | Atxn10    | Sema7a    | Fyb        |  |
| Cadm3    | S1pr1     | Timp2    | Atxn21    | Serpinh1  | Gadd45g    |  |
| Calr     | Sap30     | Tmed3    | B2m       | Sh3gl2    | Galc       |  |
| Camk1d   | Sbpl      | Tmem100  | B3galnt1  | Slc10a6   | Galns      |  |
| Camk2n1  | Sh3bgrl2  | Tmem176a | B4galnt1  | Slc16a14  | Gars       |  |
| Camkk2   | Siah2     | Tnfaip6  | B4galnt6  | Slc16a7   | Gatm       |  |
| Cap1     | Sidt2     | Tnfrsf1b | Bace2     | Slc25a30  | Gcnt2      |  |
| Capg     | Slc10a6   | Tnxb     | Baiap2    | Slc25a5   | Gda        |  |
| Capn2    | Slc16a7   | Tspo     | Baz1a     | Slc38a3   | Gfpt2      |  |
| Capza1   | Slc17a7   | Tyk2     | Bcl2      | Slc39a14  | Gmfg       |  |
| Car13    | Slc35e4   | Tyrobp   | Bcr       | Slitrk4   | Golim4     |  |
| Car5b    | Slc35f1   | Uap1     | Bdh2      | Smarca1   | Gp49a      |  |
| Carhsp1  | Slc38a3   | Vsig4    | Bend4     | Socs3     | Gpm6b      |  |
| Casp12   | Slc4a4    | Wdr32    | Bend6     | Ssr2      | Gpnmb      |  |
| Casp3    | Slitrk4   | Zeb2     | Best3     | St3gal1   | Gpr133     |  |
| Casp4    | Snrpn     |          | Bgn       | St3gal5   | Gpr137b-ps |  |
| Cblb     | Socs7     |          | Bhlhe40   | Stk39     | Gpr65      |  |
| Ccdc136  | Sstr4     |          | Bicc1     | Stxbp6    | Gprc5b     |  |
| Ccdc68   | St3gal5   |          | Bin1      | Syt12     | Gpx1       |  |
| Ccdc80   | Stk39     |          | Bin3      | Tac1      | Gpx3       |  |
| Ccdc88a  | Suox      |          | Birc3     | Taldo1    | Gpx8       |  |
| Ccl19    | Syt12     |          | Bmp1      | Tctex1d2  | Grin2c     |  |
| Ccl21a   | Tac1      |          | Bmp2k     | Tfrc      | Grk5       |  |
| Ccl8     | Tbx5      |          | Bmp4      | Thop1     | Grn        |  |
| Ccr1     | Tfrc      |          | Bmp6      | Tiparp    | Gsta1      |  |
| Cd14     | Tmem22    |          | Bmper     | Tlr7      | Gsta2      |  |
| Cd163    | Tmem35    |          | Bmx       | Tm2d2     | Hck        |  |
| Cd209a   | Tmprss13  |          | Bnc2      | Tnfrsf11a | Hcls1      |  |
| Cd248    | Tnfrsf23  |          | Boc       | Trappc6b  | Hexb       |  |
| Cd302    | Tpmt      |          | Bre       | Trdn      | Hhip11     |  |
| Cd33     | Trak2     |          | Brsk1     | Trp53i13  | Hmgn3      |  |
| Cd34     | Trav7d-2  |          | Bzw1      | Tubb2c    | Hmox1      |  |
| Cd37     | Trem2     |          | C1qc      | Zbtb16    | Hsp90aa1   |  |
| Cd44     | Trp53inp2 |          | C1qtnf2   | Zbtb8b    | Hsp90b1    |  |
| Cd47     | Tubb2c    |          | C1qtnf7   | Zcchc5    | Hspa11     |  |
| Cd48     | Tubb6     |          | C1r       | Zfp133    | Iah1       |  |
| Cd55     | Txndc2    |          | C3ar1     | Zfp826    | Ifi205     |  |
| Cd63     | Vav1      |          | C6        |           | Ifi30      |  |
| Cd68     | Zcchc5    |          | Cachd1    |           | Ifitm2     |  |
| Cd74     | Zfp367    |          | Cacnb1    |           | Ifngr1     |  |
| Cd80     | Zfp462    |          | Cacnb3    |           | Ifrd1      |  |
| Cd84     |           |          | Cadm3     |           | Igf1       |  |
| Cd86     |           |          | Cadps     |           | Igf2bp2    |  |
| Cd9      |           |          | Calcr1    |           | Igfbp6     |  |
| Cdc42se1 |           |          | Cald1     |           | Igsf6      |  |
| Cdh11    |           |          | Calhm2    |           | Il17ra     |  |
| Cdk5rap2 |           |          | Calr      |           | Il1r1      |  |
| Cdk8     |           |          | Calu      |           | Il4ra      |  |
| Cdr2     |           |          | Camk1d    |           | Il6ra      |  |
| Cebpa    |           |          | Camk2n1   |           | Inpp5d     |  |
| Cebpd    |           |          | Camsap111 |           | Ints3      |  |
| Cebpg    |           |          | Camta1    |           | Iqgap1     |  |
| Cep170   |           |          | Cap1      |           | Irf5       |  |
| Cfb      |           |          | Capn2     |           | Itga11     |  |
| Cfh      |           |          | Capza1    |           | Itgb2      |  |
| Cfi      |           |          | Car5b     |           | Kcnn3      |  |
| Cflar    |           |          | Carhsp1   |           | Kcnq5      |  |
| Cfp      |           |          | Casc4     |           | Klhl13     |  |
| Chd3     |           |          | Casp12    |           | Krt80      |  |
| Chi311   |           |          | Casp3     |           | Lame1      |  |
| Chrd11   |           |          | Casp4     |           | Laptm5     |  |
| Chst12   |           |          | Cbara1    |           | Lbp        |  |
| Cilp     |           |          | Cbl       |           | Lcp1       |  |
| Ckap4    |           |          | Cbr2      |           | Ldlr       |  |

|            |  |  |          |  |         |  |
|------------|--|--|----------|--|---------|--|
| Ckmt1      |  |  | Cbx5     |  | Leprel1 |  |
| Clcn5      |  |  | Ccdc136  |  | Lgals3  |  |
| Clec11a    |  |  | Ccdc34   |  | Lilrb3  |  |
| Clec2d     |  |  | Ccdc41   |  | Lipa    |  |
| Clec4a1    |  |  | Ccdc50   |  | Lox     |  |
| Clec4a3    |  |  | Ccdc68   |  | Lox11   |  |
| Clec4d     |  |  | Ccl21a   |  | Lox12   |  |
| Clec4n     |  |  | Ccl8     |  | Lox14   |  |
| Clic1      |  |  | Ccnb1    |  | Lpp     |  |
| Clip3      |  |  | Ccnb2    |  | Lrp8    |  |
| Cmah       |  |  | Ccnc     |  | Lsm6    |  |
| Cmklr1     |  |  | Ccnd1    |  | Ly86    |  |
| Cndp2      |  |  | Ccnd2    |  | Lyz1    |  |
| Cnn3       |  |  | Ccnyl1   |  | Lyz2    |  |
| Cnot6      |  |  | Ccr1     |  | Maged2  |  |
| Cnpy4      |  |  | Cd14     |  | Malt1   |  |
| Col12a1    |  |  | Cd200    |  | Man1a   |  |
| Col14a1    |  |  | Cd248    |  | Man2a1  |  |
| Col15a1    |  |  | Cd276    |  | Matn2   |  |
| Col16a1    |  |  | Cd302    |  | Mertk   |  |
| Col18a1    |  |  | Cd33     |  | Mfap5   |  |
| Col1a1     |  |  | Cd34     |  | Mfsd1   |  |
| Col1a2     |  |  | Cd37     |  | Mmp12   |  |
| Col4a2     |  |  | Cd52     |  | Mmp14   |  |
| Col4a4     |  |  | Cd63     |  | Mmp19   |  |
| Col4a5     |  |  | Cd80     |  | Mmp3    |  |
| Col5a1     |  |  | Cd82     |  | Mmm1    |  |
| Col5a2     |  |  | Cd86     |  | Mpeg1   |  |
| Col6a1     |  |  | Cd9      |  | Mrc1    |  |
| Col6a2     |  |  | Cdc16    |  | Ms4a6b  |  |
| Col6a3     |  |  | Cdc20    |  | Ms4a6c  |  |
| Col8a1     |  |  | Cdc25b   |  | Ms4a7   |  |
| Colec12    |  |  | Cdc27    |  | Msn     |  |
| Comp       |  |  | Cdc42se1 |  | Mt2     |  |
| Coro1a     |  |  | Cdh11    |  | Mtap1b  |  |
| Cotl1      |  |  | Cdk5rap2 |  | Mtmr11  |  |
| Cp         |  |  | Cdk6     |  | Myh7    |  |
| Cpeb1      |  |  | Cdk8     |  | Myo1f   |  |
| Cpne2      |  |  | Cdkn2c   |  | Myo7a   |  |
| Cpne8      |  |  | Cdr2     |  | Myof    |  |
| Cpt1c      |  |  | Cdr2l    |  | Napepld |  |
| Cpxm1      |  |  | Cebpa    |  | Nckap11 |  |
| Cpxm2      |  |  | Cebpd    |  | Nfkb2   |  |
| Creb3l1    |  |  | Cenpo    |  | Nid1    |  |
| Creb3l2    |  |  | Cep164   |  | Nsg1    |  |
| Crispld1   |  |  | Cep170   |  | Nubp1   |  |
| Crispld2   |  |  | Cep192   |  | Nudt5   |  |
| Crlf1      |  |  | Cerkl    |  | Nupr1   |  |
| Crtap      |  |  | Ces2     |  | Olfml2b |  |
| Csf2rb     |  |  | Cfb      |  | Osmr    |  |
| Csf2rb2    |  |  | Cfh      |  | P2ry6   |  |
| Csgalnact1 |  |  | Cfi      |  | Pabpc1  |  |
| Cspp1      |  |  | Cfp      |  | Pak1    |  |
| Csprs      |  |  | Chad     |  | Pak3    |  |
| Csrp1      |  |  | Chd9     |  | Pam     |  |
| Csrp2      |  |  | Chi3l1   |  | Pcdhb7  |  |
| Cst3       |  |  | Chn2     |  | Pcolce  |  |
| Ctdspl     |  |  | Chrd11   |  | Pde3b   |  |
| Ctgf       |  |  | Chst12   |  | Pde8a   |  |
| Ctla2a     |  |  | Chst14   |  | Pdia4   |  |
| Ctps2      |  |  | Chsy1    |  | Pdlim3  |  |
| Ctsb       |  |  | Cilp     |  | Pdlim5  |  |
| Ctsc       |  |  | Ckap4    |  | Pdpn    |  |
| Ctsh       |  |  | Ckmt1    |  | Peli1   |  |
| Ctsk       |  |  | Cks1b    |  | Pfkip   |  |
| Ctsz       |  |  | Clec11a  |  | Phka1   |  |
| Cttn       |  |  | Clec2d   |  | Pi16    |  |
| Cttntp2nl  |  |  | Clec4a1  |  | Picalm  |  |
| Cx3cl1     |  |  | Clec4a3  |  | Pira2   |  |

|         |  |  |            |  |           |  |
|---------|--|--|------------|--|-----------|--|
| Cxcl14  |  |  | Clec4n     |  | Pkd1      |  |
| Cxcl16  |  |  | Clic1      |  | Plat      |  |
| Cxcr4   |  |  | Clip3      |  | Plcb4     |  |
| Cyb5    |  |  | Cltb       |  | Plek      |  |
| Cyb561  |  |  | Cltc       |  | Plekha3   |  |
| Cyb5r3  |  |  | Cmah       |  | Plod3     |  |
| Cyba    |  |  | Cmtm3      |  | Ppm1e     |  |
| Cybb    |  |  | Cndp2      |  | Ppp1r14b  |  |
| Cyld    |  |  | Cnn2       |  | Pros1     |  |
| Cyp1b1  |  |  | Cnn3       |  | Prr13     |  |
| Cyp20a1 |  |  | Cnot6      |  | Prss23    |  |
| Cyp27a1 |  |  | Cnpy4      |  | Ptgs2     |  |
| Cyp39a1 |  |  | Cnrip1     |  | Ptpn6     |  |
| Cyp3a44 |  |  | Cntln      |  | Ptpn9     |  |
| Cyp7b1  |  |  | Col12a1    |  | Ptprc     |  |
| Cyslrl  |  |  | Col15a1    |  | Ptprj     |  |
| Cyth4   |  |  | Col18a1    |  | Rab23     |  |
| Cytl1   |  |  | Col4a4     |  | Rab3ip    |  |
| Dab2    |  |  | Col4a5     |  | Rabgap11  |  |
| Dact1   |  |  | Col5a2     |  | Rac2      |  |
| Dap     |  |  | Col5a3     |  | Rad5111   |  |
| Dbn1    |  |  | Col6a1     |  | Rarres2   |  |
| Dbnl    |  |  | Col8a1     |  | Rars      |  |
| Dcbld2  |  |  | Colec12    |  | Rassf2    |  |
| Dclk1   |  |  | Commd4     |  | Rassf4    |  |
| Dclre1c |  |  | Commd7     |  | Rcan1     |  |
| Dcn     |  |  | Comp       |  | Rcn3      |  |
| Ddr2    |  |  | Copb1      |  | Rexo2     |  |
| Ddx26b  |  |  | Copg       |  | Rhoc      |  |
| Ddx58   |  |  | Coro1a     |  | Rock2     |  |
| Dennd1c |  |  | Coro1c     |  | Rtn4      |  |
| Dennd4a |  |  | Coro7      |  | S100a10   |  |
| Derl3   |  |  | Cotl1      |  | S100a11   |  |
| Des     |  |  | Cp         |  | S100a6    |  |
| Dio2    |  |  | Cpeb1      |  | Scpep1    |  |
| Dkk3    |  |  | Cpne2      |  | Sdf211    |  |
| Dnaja1  |  |  | Cpt1c      |  | Sec61a1   |  |
| Dnajb11 |  |  | Cpxm1      |  | Selplg    |  |
| Dnajc3  |  |  | Cpxm2      |  | Serpina3h |  |
| Dnm1    |  |  | Creb311    |  | Serpina3n |  |
| Dnm3os  |  |  | Creb312    |  | Serpine2  |  |
| Dnmt1   |  |  | Creb5      |  | Sfrp1     |  |
| Dock1   |  |  | Crip1      |  | Sfxn3     |  |
| Dock10  |  |  | Crispld1   |  | Sh3d19    |  |
| Dock11  |  |  | Crispld2   |  | Sh3gl1    |  |
| Dock2   |  |  | Crlf1      |  | Sla       |  |
| Dock7   |  |  | Crtap      |  | Slc11a1   |  |
| Dok1    |  |  | Csf1       |  | Slc16a3   |  |
| Dok5    |  |  | Csf2ra     |  | Slc35b4   |  |
| Dopey2  |  |  | Csf2rb     |  | Slc35e4   |  |
| Dpep1   |  |  | Csf2rb2    |  | Slc39a13  |  |
| Dpm2    |  |  | Csgalnact1 |  | Slc6a9    |  |
| Dpp3    |  |  | Csgalnact2 |  | Slc7a5    |  |
| Dpp7    |  |  | Csk        |  | Slc7a7    |  |
| Dpt     |  |  | Csnk1g3    |  | Slc9a7    |  |
| Dpy19l1 |  |  | Cspg4      |  | Slnf2     |  |
| Dpysl2  |  |  | Cspp1      |  | Smc4      |  |
| Dpysl3  |  |  | Csrp1      |  | Socs2     |  |
| Dse     |  |  | Csrp2      |  | Sorbs3    |  |
| Dsel    |  |  | Cst3       |  | Sparc     |  |
| Dstn    |  |  | Cstb       |  | Stab1     |  |
| Dynl1   |  |  | Ctbs       |  | Stx11     |  |
| Dzip3   |  |  | Ctdspl     |  | Stxbp2    |  |
| Ebf2    |  |  | Ctgf       |  | Sulf2     |  |
| Ebp     |  |  | Cthrc1     |  | Taok3     |  |
| Ece2    |  |  | Ctla2a     |  | Tbxas1    |  |
| Ecm2    |  |  | Ctnnd1     |  | Tctn2     |  |
| Edem1   |  |  | Ctps2      |  | Timp1     |  |
| Eef1a1  |  |  | Ctsb       |  | Timp2     |  |

|          |  |  |           |  |          |  |
|----------|--|--|-----------|--|----------|--|
| Efemp2   |  |  | Ctsc      |  | Tm6sf1   |  |
| Efhd1    |  |  | Ctsk      |  | Tmed3    |  |
| Efhd2    |  |  | Ctsz      |  | Tmem100  |  |
| Egfr     |  |  | Cttm      |  | Tmem106a |  |
| Egr2     |  |  | Ctnbnp2nl |  | Tmem176a |  |
| Eid3     |  |  | Cul2      |  | Tmem39a  |  |
| Elmo1    |  |  | Cul4b     |  | Tmem43   |  |
| Eln      |  |  | Cx3cl1    |  | Tnc      |  |
| Elov11   |  |  | Cxcr4     |  | Tnfrsf23 |  |
| Emb      |  |  | Cyb5r1    |  | Tns3     |  |
| Emilin1  |  |  | Cyba      |  | Trak2    |  |
| Emilin2  |  |  | Cyfip1    |  | Tram2    |  |
| Emp1     |  |  | Cygb      |  | Trem2    |  |
| Emp3     |  |  | Cyld      |  | Trf      |  |
| Enah     |  |  | Cyp20a1   |  | Trib3    |  |
| Eno1     |  |  | Cyp27a1   |  | Trpv4    |  |
| Eno2     |  |  | Cyp39a1   |  | Tspo     |  |
| Enpp1    |  |  | Cyp7b1    |  | Tubb5    |  |
| Entpd1   |  |  | Cyslrl    |  | Twf1     |  |
| Entpd2   |  |  | Cyth3     |  | Tyropb   |  |
| Epb4.112 |  |  | Cytl1     |  | Uap1     |  |
| Ephx1    |  |  | Dact1     |  | Uchl1    |  |
| Eps15    |  |  | Daglb     |  | Uck2     |  |
| Eps8     |  |  | Dbnl      |  | Ucp2     |  |
| Esd      |  |  | Dcbld2    |  | Ugt1a9   |  |
| Etv1     |  |  | Dchs1     |  | Unc93b1  |  |
| Etv5     |  |  | Dclk1     |  | Vav1     |  |
| Etv6     |  |  | Dclre1c   |  | Vim      |  |
| Evc      |  |  | Dcn       |  | Vsig4    |  |
| Evc2     |  |  | Dctn5     |  | Wdr32    |  |
| F13a1    |  |  | Dcun1d3   |  | Wipf1    |  |
| Fads1    |  |  | Ddah1     |  | Zdhhc2   |  |
| Faf2     |  |  | Ddah2     |  | Zfp462   |  |
| Fam105a  |  |  | Ddef2     |  |          |  |
| Fam114a1 |  |  | Ddost     |  |          |  |
| Fam129a  |  |  | Ddx26b    |  |          |  |
| Fam129b  |  |  | Ddx41     |  |          |  |
| Fam13b   |  |  | Ddx58     |  |          |  |
| Fam149a  |  |  | Dennd2a   |  |          |  |
| Fam3c    |  |  | Dennd5a   |  |          |  |
| Fam70b   |  |  | Depdc5    |  |          |  |
| Far1     |  |  | Des       |  |          |  |
| Farpl    |  |  | Dhcr24    |  |          |  |
| Fasn     |  |  | Dhx9      |  |          |  |
| Fat1     |  |  | Diap1     |  |          |  |
| Fbln1    |  |  | Dio2      |  |          |  |
| Fbln2    |  |  | Dkk3      |  |          |  |
| Fbln5    |  |  | Dlg5      |  |          |  |
| Fbn1     |  |  | Dnajb11   |  |          |  |
| Fbx116   |  |  | Dnajc10   |  |          |  |
| Fcer1g   |  |  | Dnajc14   |  |          |  |
| Fcgr1    |  |  | Dnajc3    |  |          |  |
| Fchsd2   |  |  | Dnm1      |  |          |  |
| Fcr1s    |  |  | Dnm3os    |  |          |  |
| Fermt3   |  |  | Dnmt1     |  |          |  |
| Fgf7     |  |  | Dock1     |  |          |  |
| Fgfr1    |  |  | Dock10    |  |          |  |
| Fibin    |  |  | Dock11    |  |          |  |
| Figf     |  |  | Dock6     |  |          |  |
| Filip11  |  |  | Dock7     |  |          |  |
| Fkbp14   |  |  | Dok1      |  |          |  |
| Fkbp7    |  |  | Dopey2    |  |          |  |
| Flna     |  |  | Dpep2     |  |          |  |
| Flnb     |  |  | Dpp3      |  |          |  |
| Flrt2    |  |  | Dpp7      |  |          |  |
| Flt3l    |  |  | Dpt       |  |          |  |
| Flt4     |  |  | Dpy19l1   |  |          |  |
| Fmnl2    |  |  | Dpysl2    |  |          |  |
| Fmod     |  |  | Dpysl3    |  |          |  |

|            |  |  |          |  |  |
|------------|--|--|----------|--|--|
| Fn1        |  |  | Dse      |  |  |
| Fndc1      |  |  | Dse1     |  |  |
| Fndc3a     |  |  | Dstn     |  |  |
| Fndc3b     |  |  | Dtx3     |  |  |
| Folr2      |  |  | Dusp4    |  |  |
| Foxp1      |  |  | Dync1i2  |  |  |
| Foxp2      |  |  | Dync1li1 |  |  |
| Frm4b      |  |  | Dync2h1  |  |  |
| Frzb       |  |  | Dynl1    |  |  |
| Fstl1      |  |  | Dzip1    |  |  |
| Fuca1      |  |  | Ebf1     |  |  |
| Fut11      |  |  | Ebf2     |  |  |
| Fxyd5      |  |  | Ece2     |  |  |
| Fxyd6      |  |  | Ecm1     |  |  |
| Fyb        |  |  | Ecm2     |  |  |
| Fzd1       |  |  | Ect2     |  |  |
| Fzd7       |  |  | Edem2    |  |  |
| G6pdx      |  |  | Eef1a1   |  |  |
| Gab2       |  |  | Efha1    |  |  |
| Gadd45g    |  |  | Efhd1    |  |  |
| Galc       |  |  | Efhd2    |  |  |
| Galnt11    |  |  | Egfr     |  |  |
| Gars       |  |  | Egr2     |  |  |
| Gas2l3     |  |  | Ehd3     |  |  |
| Gas5       |  |  | Ehd4     |  |  |
| Gas6       |  |  | Ehmt2    |  |  |
| Gas7       |  |  | Eid3     |  |  |
| Gatm       |  |  | Eif1a    |  |  |
| Gba        |  |  | Eif2ak3  |  |  |
| Gclm       |  |  | Eif3a    |  |  |
| Gcnt2      |  |  | Eif4a1   |  |  |
| Gdap2      |  |  | Eif5a2   |  |  |
| Gdf15      |  |  | Eif6     |  |  |
| Ggh        |  |  | Elmo1    |  |  |
| Gla        |  |  | Elmo2    |  |  |
| Glcci1     |  |  | Elov16   |  |  |
| Gli3       |  |  | Elp2     |  |  |
| Glipr2     |  |  | Emb      |  |  |
| Glis2      |  |  | Emilin1  |  |  |
| Glt8d4     |  |  | Eml4     |  |  |
| Gltp       |  |  | Emp1     |  |  |
| Gmfb       |  |  | Emp3     |  |  |
| Gmfg       |  |  | Enah     |  |  |
| Gmip       |  |  | Endod1   |  |  |
| Gna13      |  |  | Eno1     |  |  |
| Gnai2      |  |  | Eno2     |  |  |
| Gnai3      |  |  | Enpp1    |  |  |
| Gnao1      |  |  | Enpp3    |  |  |
| Gnb4       |  |  | Epb4.112 |  |  |
| Golim4     |  |  | Epha7    |  |  |
| Golt1b     |  |  | Ephx1    |  |  |
| Gp49a      |  |  | Eprs     |  |  |
| Gpbar1     |  |  | Eps15    |  |  |
| Gpc4       |  |  | Erb2ip   |  |  |
| Gpc6       |  |  | Ergic1   |  |  |
| Gpm6b      |  |  | Ergic3   |  |  |
| Gpnmb      |  |  | Erlin1   |  |  |
| Gpr124     |  |  | Ero11    |  |  |
| Gpr137b    |  |  | Ero11b   |  |  |
| Gpr137b-ps |  |  | Esd      |  |  |
| Gpr153     |  |  | Etv1     |  |  |
| Gpr161     |  |  | Etv5     |  |  |
| Gpr177     |  |  | Etv6     |  |  |
| Gpr64      |  |  | Evc      |  |  |
| Gprc5b     |  |  | Evc2     |  |  |
| Gria3      |  |  | Evi2a    |  |  |
| Grina      |  |  | Evi5     |  |  |
| Grn        |  |  | Exoc5    |  |  |
| Gsn        |  |  | Exoc6b   |  |  |

|          |  |  |          |  |  |
|----------|--|--|----------|--|--|
| Gsta1    |  |  | F13a1    |  |  |
| Gsta2    |  |  | F2r      |  |  |
| Gtf2h1   |  |  | Fads2    |  |  |
| Gusb     |  |  | Fam102b  |  |  |
| H2-Aa    |  |  | Fam105b  |  |  |
| H2-Ab1   |  |  | Fam114a1 |  |  |
| H2-D1    |  |  | Fam115a  |  |  |
| H2-DMa   |  |  | Fam124a  |  |  |
| Hck      |  |  | Fam126b  |  |  |
| Hcls1    |  |  | Fam129a  |  |  |
| Hdac1    |  |  | Fam129b  |  |  |
| Heatr7a  |  |  | Fam13b   |  |  |
| Hectd1   |  |  | Fam13c   |  |  |
| Hectd2   |  |  | Fam149a  |  |  |
| Heg1     |  |  | Fam162a  |  |  |
| Herc5    |  |  | Fam164a  |  |  |
| Hexa     |  |  | Fam168a  |  |  |
| Hgf      |  |  | Fam20a   |  |  |
| Hip1     |  |  | Fam20c   |  |  |
| Hmcn2    |  |  | Fam26e   |  |  |
| Hmha1    |  |  | Fam38b   |  |  |
| Hmox1    |  |  | Fam38b2  |  |  |
| Hn11     |  |  | Fam3a    |  |  |
| Hnrnpa3  |  |  | Fam3c    |  |  |
| Hnrnpf   |  |  | Fam48a   |  |  |
| Hnrnp2   |  |  | Fam50a   |  |  |
| Hp       |  |  | Fam70b   |  |  |
| Hps3     |  |  | Far1     |  |  |
| Hsp90b1  |  |  | Farp1    |  |  |
| Hspa13   |  |  | Fasn     |  |  |
| Hspa1a   |  |  | Fat1     |  |  |
| Hspa8    |  |  | Fbln5    |  |  |
| Hspb1    |  |  | Fbln7    |  |  |
| Hsph1    |  |  | Fbn2     |  |  |
| Htr2b    |  |  | Fbxl16   |  |  |
| Htra3    |  |  | Fbxw17   |  |  |
| Htra4    |  |  | Fchsd2   |  |  |
| Hyou1    |  |  | Fcr1s    |  |  |
| Iars     |  |  | Fdps     |  |  |
| Id2      |  |  | Fermt3   |  |  |
| Ifi202b  |  |  | Fez2     |  |  |
| Ifi204   |  |  | Fgf7     |  |  |
| Ifi2712a |  |  | Fgfr1    |  |  |
| Ifi30    |  |  | Fibin    |  |  |
| Ifi47    |  |  | Figf     |  |  |
| Ifih1    |  |  | Fkbp10   |  |  |
| Ifit1    |  |  | Fkbp14   |  |  |
| Ifitm1   |  |  | Fkbp7    |  |  |
| Ifitm2   |  |  | Fkbp9    |  |  |
| Ifitm3   |  |  | Flna     |  |  |
| Ifngr1   |  |  | Flnc     |  |  |
| Ifit122  |  |  | Flrt2    |  |  |
| Ifit80   |  |  | Flt31    |  |  |
| Igf1     |  |  | Flt4     |  |  |
| Igf1r    |  |  | Fmnl2    |  |  |
| Igf2bp2  |  |  | Fmod     |  |  |
| Igfbp4   |  |  | Fmr1     |  |  |
| Igfbp5   |  |  | Fndc1    |  |  |
| Igfbp6   |  |  | Fndc3a   |  |  |
| Igfbp7   |  |  | Fndc3b   |  |  |
| Igsf10   |  |  | Folr2    |  |  |
| Igsf6    |  |  | Fosl2    |  |  |
| Ikbke    |  |  | Foxp1    |  |  |
| Il16     |  |  | Foxp2    |  |  |
| Il17ra   |  |  | Frem1    |  |  |
| Il17rd   |  |  | Frm4b    |  |  |
| Il1r1    |  |  | Frzb     |  |  |
| Il33     |  |  | Fstl3    |  |  |
| Il4ra    |  |  | Ftl1     |  |  |



|          |  |  |         |  |  |
|----------|--|--|---------|--|--|
| Il6st    |  |  | Ftl2    |  |  |
| Il7r     |  |  | Fuca1   |  |  |
| Ildr2    |  |  | Fut11   |  |  |
| Ilk      |  |  | Fxyd5   |  |  |
| Inpp5d   |  |  | Fxyd6   |  |  |
| Inpp5f   |  |  | Fzd1    |  |  |
| Ints3    |  |  | Fzd2    |  |  |
| Invs     |  |  | Fzd7    |  |  |
| Iqgap1   |  |  | G6pdx   |  |  |
| Irak4    |  |  | Gab2    |  |  |
| Irf7     |  |  | Galntl1 |  |  |
| Irf9     |  |  | Gan     |  |  |
| Islr     |  |  | Gas1    |  |  |
| Itga2    |  |  | Gas211  |  |  |
| Itga5    |  |  | Gas213  |  |  |
| Itgam    |  |  | Gas5    |  |  |
| Itgav    |  |  | Gas6    |  |  |
| Itgb1bp3 |  |  | Gas7    |  |  |
| Itgb5    |  |  | Gba     |  |  |
| Itgb8    |  |  | Gbe1    |  |  |
| Itgb11   |  |  | Gbgt1   |  |  |
| Itih2    |  |  | Gclc    |  |  |
| Itih5    |  |  | Gclm    |  |  |
| Itm2c    |  |  | Gdap2   |  |  |
| Itpk1    |  |  | Gdf15   |  |  |
| Itpripl2 |  |  | Gdf6    |  |  |
| Its1     |  |  | Gfpt1   |  |  |
| Jag1     |  |  | Ggh     |  |  |
| Jak2     |  |  | Gla     |  |  |
| Kalrn    |  |  | Glb1    |  |  |
| Kcne4    |  |  | Glb11   |  |  |
| Kcnk6    |  |  | Glecc1  |  |  |
| Kcnn3    |  |  | Gli2    |  |  |
| Kcnt2    |  |  | Gli3    |  |  |
| Kdelc2   |  |  | Glipr2  |  |  |
| Kdelr3   |  |  | Glis2   |  |  |
| Kif3b    |  |  | Glt8d1  |  |  |
| Kif5b    |  |  | Glt8d4  |  |  |
| Kirrel   |  |  | Gltp    |  |  |
| Klc1     |  |  | Gm2a    |  |  |
| Klf10    |  |  | Gm885   |  |  |
| Klhl29   |  |  | Gmfb    |  |  |
| Klraq1   |  |  | Gmip    |  |  |
| Kmo      |  |  | Gmppa   |  |  |
| Krt18    |  |  | Gna13   |  |  |
| Ktelc1   |  |  | Gnai2   |  |  |
| Lamc1    |  |  | Gnai3   |  |  |
| Lamp2    |  |  | Gnao1   |  |  |
| Laptm5   |  |  | Gnb1    |  |  |
| Lass6    |  |  | Gng12   |  |  |
| Lats1    |  |  | Gng8    |  |  |
| Layn     |  |  | Golgb1  |  |  |
| Lbp      |  |  | Golt1b  |  |  |
| Lcp1     |  |  | Gosr2   |  |  |
| Ldlr     |  |  | Gpc4    |  |  |
| Leprel1  |  |  | Gpc6    |  |  |
| Leprel2  |  |  | Gpr124  |  |  |
| Leprot   |  |  | Gpr137b |  |  |
| Lgals3   |  |  | Gpr153  |  |  |
| Lgals9   |  |  | Gpr161  |  |  |
| Lgmn     |  |  | Gpr177  |  |  |
| Lhfp     |  |  | Gpr52   |  |  |
| Lig1     |  |  | Gpr64   |  |  |
| Lilrb4   |  |  | Gria3   |  |  |
| Litaf    |  |  | Grip1   |  |  |
| Lmna     |  |  | Gsn     |  |  |
| Lox      |  |  | Gss     |  |  |
| Lox11    |  |  | Gtf2h1  |  |  |
| Lox12    |  |  | Gtpbp4  |  |  |

|         |  |  |          |  |  |
|---------|--|--|----------|--|--|
| Loxl3   |  |  | Gucy1a3  |  |  |
| Loxl4   |  |  | Gucy1b3  |  |  |
| Lpar1   |  |  | Gulp1    |  |  |
| Lpin2   |  |  | Gusb     |  |  |
| Lpp     |  |  | Gyg      |  |  |
| Lrp1    |  |  | H2-Aa    |  |  |
| Lrrc16a |  |  | H2-Eb1   |  |  |
| Lrrc33  |  |  | H2-T10   |  |  |
| Lrrk1   |  |  | H3f3b    |  |  |
| Lrrn4cl |  |  | Hbegf    |  |  |
| Lsm14a  |  |  | Hdac1    |  |  |
| Lsm6    |  |  | Hdgfrp3  |  |  |
| Lsp1    |  |  | Heatr5a  |  |  |
| Ltbp2   |  |  | Hectd1   |  |  |
| Ltbp3   |  |  | Hectd2   |  |  |
| Ltbp4   |  |  | Heg1     |  |  |
| Lum     |  |  | Hexa     |  |  |
| Ly6c1   |  |  | Hfe      |  |  |
| Ly86    |  |  | Hgf      |  |  |
| Lyst    |  |  | Hgs      |  |  |
| Maf     |  |  | Hiat1l   |  |  |
| Mafk    |  |  | Hif1a    |  |  |
| Maml1d1 |  |  | Hip1     |  |  |
| Man1a2  |  |  | Hivep1   |  |  |
| Man2a1  |  |  | Hltf     |  |  |
| Man2b1  |  |  | Hmgcr    |  |  |
| Man2b2  |  |  | Hmha1    |  |  |
| Maoa    |  |  | Hn1      |  |  |
| Map3k12 |  |  | Hn1l     |  |  |
| Map3k14 |  |  | Hnrnpa3  |  |  |
| Mapre1  |  |  | Hnrnpf   |  |  |
| Marcks  |  |  | Hps3     |  |  |
| Mark1   |  |  | Hpse     |  |  |
| Matn2   |  |  | Hr       |  |  |
| Mbc2    |  |  | Hs2st1   |  |  |
| Mcm3    |  |  | Hsd17b12 |  |  |
| Mdfic   |  |  | Hsd17b7  |  |  |
| Med15   |  |  | Hspa13   |  |  |
| Meg3    |  |  | Hspa1a   |  |  |
| Meox1   |  |  | Hspb1    |  |  |
| Mertk   |  |  | Hspbap1  |  |  |
| Mfap2   |  |  | Htra3    |  |  |
| Mfap4   |  |  | Htra4    |  |  |
| Mfge8   |  |  | Hvcn1    |  |  |
| Mfsd1   |  |  | Hyal1    |  |  |
| Mfsd6   |  |  | Hyou1    |  |  |
| Mgat2   |  |  | Icam1    |  |  |
| Mgl1    |  |  | Id2      |  |  |
| Mgl2    |  |  | Id4      |  |  |
| Mgp     |  |  | Idi1     |  |  |
| Mical1  |  |  | Iffo1    |  |  |
| Mical2  |  |  | Ifi202b  |  |  |
| Mlec    |  |  | Ifi204   |  |  |
| Mmp14   |  |  | Ifi2711  |  |  |
| Mmp16   |  |  | Ifi2712a |  |  |
| Mmp19   |  |  | Ifih1    |  |  |
| Mmp2    |  |  | Ifitm3   |  |  |
| Mmp23   |  |  | Ifit122  |  |  |
| Mmrn1   |  |  | Ifit80   |  |  |
| Mobk11b |  |  | Igflr    |  |  |
| Mobk12a |  |  | Igfbp4   |  |  |
| Morc3   |  |  | Igfbp5   |  |  |
| Morf4l2 |  |  | Igfbp7   |  |  |
| Mpp1    |  |  | Igsf10   |  |  |
| Mras    |  |  | Igsf3    |  |  |
| Mrc2    |  |  | Ikbke    |  |  |
| Ms4a14  |  |  | Il10ra   |  |  |
| Ms4a4a  |  |  | Il16     |  |  |
| Ms4a6b  |  |  | Il17rc   |  |  |

|           |  |  |          |  |  |
|-----------|--|--|----------|--|--|
| Ms4a6d    |  |  | Il17rd   |  |  |
| Ms4a7     |  |  | Il1rl2   |  |  |
| Msn       |  |  | Il21r    |  |  |
| Msr1      |  |  | Il33     |  |  |
| Mtap1a    |  |  | Il6st    |  |  |
| Mtap1b    |  |  | Illdr2   |  |  |
| Mtap4     |  |  | Ilk      |  |  |
| Mtap6     |  |  | Inpp5f   |  |  |
| Mtap7d3   |  |  | Ints2    |  |  |
| Mthfd2    |  |  | Invs     |  |  |
| Mtmr11    |  |  | Ipo4     |  |  |
| Mtmr6     |  |  | Ipo7     |  |  |
| Mtpn      |  |  | Ipo9     |  |  |
| Mustn1    |  |  | Iqgap3   |  |  |
| Mxra7     |  |  | Irak3    |  |  |
| Mxra8     |  |  | Irak4    |  |  |
| Myb11     |  |  | Irf9     |  |  |
| Myc       |  |  | Islr     |  |  |
| Mycbp2    |  |  | Ism1     |  |  |
| Myh10     |  |  | Itga1    |  |  |
| Myh9      |  |  | Itga5    |  |  |
| Myo1d     |  |  | Itga9    |  |  |
| Myo1e     |  |  | Itgam    |  |  |
| Myo1f     |  |  | Itgav    |  |  |
| Myo1g     |  |  | Itgb1    |  |  |
| Myo5a     |  |  | Itgb1bp3 |  |  |
| Myo7a     |  |  | Itgb3bp  |  |  |
| Myo9a     |  |  | Itgb5    |  |  |
| Myoc      |  |  | Itgb8    |  |  |
| Myof      |  |  | Itgb11   |  |  |
| Naalad2   |  |  | Itih2    |  |  |
| Nab1      |  |  | Itih4    |  |  |
| Nalcn     |  |  | Itih5    |  |  |
| Nans      |  |  | Itm2a    |  |  |
| Nap111    |  |  | Itm2c    |  |  |
| Nars      |  |  | Itpk1    |  |  |
| Nat13     |  |  | Itpr12   |  |  |
| Nav1      |  |  | Itsn1    |  |  |
| Nbl1      |  |  | Jag1     |  |  |
| Ncam1     |  |  | Jak2     |  |  |
| Ncapg2    |  |  | Kalrn    |  |  |
| Ncf1      |  |  | Kbtbd11  |  |  |
| Ncf2      |  |  | Kcnab2   |  |  |
| Nckap11   |  |  | Kcne4    |  |  |
| Ncoa7     |  |  | Kcnk6    |  |  |
| Ndn       |  |  | Kcnma1   |  |  |
| Ndst2     |  |  | Kcnt2    |  |  |
| Nek6      |  |  | Kctd10   |  |  |
| Neur3     |  |  | Kctd17   |  |  |
| Nfatc4    |  |  | Kdelc2   |  |  |
| Nfkb1     |  |  | Kdelr3   |  |  |
| Nfkb2     |  |  | Kif13b   |  |  |
| Nfkbiz    |  |  | Kif1a    |  |  |
| Nfya      |  |  | Kif21b   |  |  |
| Ngef      |  |  | Kif3a    |  |  |
| Ngf       |  |  | Kif3b    |  |  |
| Nhlrc3    |  |  | Kif3c    |  |  |
| Nid1      |  |  | Kif5b    |  |  |
| Nipsnap3a |  |  | Kif5c    |  |  |
| Nkd2      |  |  | Kirrel   |  |  |
| Nlgn2     |  |  | Klc1     |  |  |
| Nlrc4     |  |  | Klhl29   |  |  |
| Nme1      |  |  | Klraq1   |  |  |
| Nmt2      |  |  | Kpnb1    |  |  |
| Nono      |  |  | Krt18    |  |  |
| Notch2    |  |  | Ktelc1   |  |  |
| Nox4      |  |  | Lamp2    |  |  |
| Npc2      |  |  | Lass2    |  |  |
| Npdc1     |  |  | Lass5    |  |  |

|          |  |  |          |  |  |
|----------|--|--|----------|--|--|
| Npl      |  |  | Lass6    |  |  |
| Npm1     |  |  | Lats1    |  |  |
| Nppa     |  |  | Layn     |  |  |
| Nptn     |  |  | Ldlrad3  |  |  |
| Nr4a3    |  |  | Lepre1   |  |  |
| Nsdhl    |  |  | Lepre2   |  |  |
| Nsg1     |  |  | Leprot   |  |  |
| Nt5c     |  |  | Lgals1   |  |  |
| Nuak2    |  |  | Lgals3bp |  |  |
| Nucb2    |  |  | Lgals9   |  |  |
| Numbl    |  |  | Lgi2     |  |  |
| Nxf1     |  |  | Lgmn     |  |  |
| Oas2     |  |  | Lhfp     |  |  |
| Oasl2    |  |  | Lhfp2    |  |  |
| Obfc2a   |  |  | Lig1     |  |  |
| Odz3     |  |  | Lilrb4   |  |  |
| Ogn      |  |  | Litaf    |  |  |
| Olfml1   |  |  | Lmcd1    |  |  |
| Olfml3   |  |  | Lmna     |  |  |
| Os9      |  |  | Lmo4     |  |  |
| Ostc     |  |  | Lonrf3   |  |  |
| Otub2    |  |  | Lox13    |  |  |
| P2rx4    |  |  | Lpar1    |  |  |
| P2rx7    |  |  | Lpar4    |  |  |
| P4ha1    |  |  | Lpcat2   |  |  |
| P4hb     |  |  | Lpin2    |  |  |
| Pabpc1   |  |  | Lrig3    |  |  |
| Pafah1b2 |  |  | Lrp1     |  |  |
| Pak1     |  |  | Lrp5     |  |  |
| Pak3     |  |  | Lrrc16a  |  |  |
| Pamr1    |  |  | Lrrc25   |  |  |
| Panx1    |  |  | Lrrc40   |  |  |
| Papd4    |  |  | Lrrc49   |  |  |
| Papss2   |  |  | Lrrc51   |  |  |
| Parp3    |  |  | Lrrc59   |  |  |
| Parp9    |  |  | Lrrk1    |  |  |
| Parvg    |  |  | Lrrm4cl  |  |  |
| Pbx3     |  |  | Lsp1     |  |  |
| Pcdh9    |  |  | Ltbp2    |  |  |
| Pcdhb16  |  |  | Ltbp3    |  |  |
| Pcdhb7   |  |  | Ltbp4    |  |  |
| Pcolce   |  |  | Lum      |  |  |
| Pcolce2  |  |  | Lxn      |  |  |
| Pcyox1   |  |  | Ly6a     |  |  |
| Pdcd4    |  |  | Ly9      |  |  |
| Pde1a    |  |  | Lypd1    |  |  |
| Pde7b    |  |  | Lyplal1  |  |  |
| Pde8a    |  |  | Lyst     |  |  |
| Pde9a    |  |  | Lztr1    |  |  |
| Pdgcfc   |  |  | Maf      |  |  |
| Pdgfra   |  |  | Mafk     |  |  |
| Pdgfrl   |  |  | Mak16    |  |  |
| Pdia3    |  |  | Mamdc2   |  |  |
| Pdia4    |  |  | Maml2    |  |  |
| Pdia6    |  |  | Maml1    |  |  |
| Pdk3     |  |  | Man1a2   |  |  |
| Pdlim3   |  |  | Man2b1   |  |  |
| Pdlim5   |  |  | Man2b2   |  |  |
| Pdlim7   |  |  | Maoa     |  |  |
| Pdpn     |  |  | Map3k12  |  |  |
| Pdzd11   |  |  | Map3k14  |  |  |
| Pea15a   |  |  | Map3k3   |  |  |
| Pfkfb3   |  |  | Map3k8   |  |  |
| Pftk1    |  |  | Mapk7    |  |  |
| Pgcp     |  |  | Mapre1   |  |  |
| Pgd      |  |  | Marcks   |  |  |
| Pgk1     |  |  | Mark1    |  |  |
| Pgm1     |  |  | Mast4    |  |  |
| Phf21a   |  |  | Mbc2     |  |  |

|          |  |  |         |  |  |
|----------|--|--|---------|--|--|
| Phtf1    |  |  | Mbtps1  |  |  |
| Pi16     |  |  | Mcam    |  |  |
| Pj4k2a   |  |  | Mcm2    |  |  |
| Picalm   |  |  | Mcm3    |  |  |
| Pik3cg   |  |  | Mcm6    |  |  |
| Pion     |  |  | Mcm7    |  |  |
| Pip4k2a  |  |  | Mdfic   |  |  |
| Pira3    |  |  | Mdk     |  |  |
| Pisd-ps1 |  |  | Me2     |  |  |
| Pitpna   |  |  | Med10   |  |  |
| Pkd1     |  |  | Med15   |  |  |
| Pkd2     |  |  | Meg3    |  |  |
| Pla1a    |  |  | Megf10  |  |  |
| Pla2g2d  |  |  | Megf8   |  |  |
| Pla2g4a  |  |  | Meox1   |  |  |
| Pla2g7   |  |  | Mfap2   |  |  |
| Plaa     |  |  | Mfap3   |  |  |
| Plat     |  |  | Mfap4   |  |  |
| Plcg2    |  |  | Mfge8   |  |  |
| Pld3     |  |  | Mfsd10  |  |  |
| Pld4     |  |  | Mfsd6   |  |  |
| Plek     |  |  | Mgat2   |  |  |
| Plekha4  |  |  | Mgl1    |  |  |
| Plekho1  |  |  | Mgl2    |  |  |
| Plk2     |  |  | Mgp     |  |  |
| Plod3    |  |  | Mib1    |  |  |
| Plp2     |  |  | Mical1  |  |  |
| Pls3     |  |  | Mical2  |  |  |
| Pltp     |  |  | Mif     |  |  |
| Plvap    |  |  | Mlec    |  |  |
| Plxdc2   |  |  | Milk1   |  |  |
| Plxnb2   |  |  | Mllt11  |  |  |
| Plxnc1   |  |  | Mmgt2   |  |  |
| Pmepa1   |  |  | Mmp2    |  |  |
| Pmp22    |  |  | Mmp23   |  |  |
| Pnp1     |  |  | Mobk11b |  |  |
| Pole2    |  |  | Mobk12a |  |  |
| Polr3e   |  |  | Morc3   |  |  |
| Pon2     |  |  | Morf412 |  |  |
| Postn    |  |  | Mpp1    |  |  |
| Ppap2b   |  |  | Mpz11   |  |  |
| Ppap2c   |  |  | Mras    |  |  |
| Ppapdc1b |  |  | Mrc2    |  |  |
| Ppia     |  |  | Ms4a14  |  |  |
| Ppib     |  |  | Ms4a4a  |  |  |
| Ppm1e    |  |  | Ms4a6d  |  |  |
| Pqlc3    |  |  | Msr1    |  |  |
| Praf2    |  |  | Mtap1a  |  |  |
| Prdx4    |  |  | Mtap4   |  |  |
| Preld1   |  |  | Mtap6   |  |  |
| Prelp    |  |  | Mtap7d3 |  |  |
| Prg4     |  |  | Mthfd2  |  |  |
| Prkcb    |  |  | Mtmr12  |  |  |
| Prkcd    |  |  | Mtmr6   |  |  |
| Prkd3    |  |  | Mtpn    |  |  |
| Pros1    |  |  | Muc15   |  |  |
| Prpmp5   |  |  | Mum111  |  |  |
| Prr13    |  |  | Mvp     |  |  |
| Prrx2    |  |  | Mxra7   |  |  |
| Ptbp1    |  |  | Mxra8   |  |  |
| Ptger4   |  |  | Mybl1   |  |  |
| Ptges3   |  |  | Myc     |  |  |
| Ptgfr    |  |  | Mycbp2  |  |  |
| Ptgfrn   |  |  | Myh10   |  |  |
| Ptgis    |  |  | Myh9    |  |  |
| Ptgs2    |  |  | Myh12b  |  |  |
| Ptk2b    |  |  | Myh9    |  |  |
| Ptms     |  |  | Myo1c   |  |  |
| Ptn      |  |  | Myo1d   |  |  |

|          |  |  |           |  |  |
|----------|--|--|-----------|--|--|
| Ptpn1    |  |  | Myo1e     |  |  |
| Ptpn12   |  |  | Myo1g     |  |  |
| Ptpn6    |  |  | Myo5a     |  |  |
| Ptprc    |  |  | Myo9a     |  |  |
| Ptprf    |  |  | Myo9b     |  |  |
| Ptprz1   |  |  | Myoc      |  |  |
| Pvrl3    |  |  | Myrip     |  |  |
| Pvt1     |  |  | Naaa      |  |  |
| Qpct     |  |  | Naalad2   |  |  |
| Qsox1    |  |  | Naaladl2  |  |  |
| Rab23    |  |  | Nab1      |  |  |
| Rab31    |  |  | Nagk      |  |  |
| Rab3d    |  |  | Naglu     |  |  |
| Rab3il1  |  |  | Nalcn     |  |  |
| Rab4b    |  |  | Nans      |  |  |
| Rab71l   |  |  | Nap1l1    |  |  |
| Rab8a    |  |  | Nars      |  |  |
| Rab8b    |  |  | Nav1      |  |  |
| Rac2     |  |  | Nbl1      |  |  |
| Rai14    |  |  | Ncam1     |  |  |
| Rangap1  |  |  | Ncapg2    |  |  |
| Rap1b    |  |  | Ncf1      |  |  |
| Rarres2  |  |  | Ncf2      |  |  |
| Rasa3    |  |  | Nckap1    |  |  |
| Rasgrp4  |  |  | Ncoa7     |  |  |
| Rassf2   |  |  | Ndn       |  |  |
| Rbl1     |  |  | Ndrg4     |  |  |
| Rbm7     |  |  | Necap2    |  |  |
| Rbms3    |  |  | Nedd9     |  |  |
| Rbp1     |  |  | Negr1     |  |  |
| Rbpj     |  |  | Nek6      |  |  |
| Rcan1    |  |  | Nelf      |  |  |
| Rcn3     |  |  | Neur13    |  |  |
| Reck     |  |  | Nfat5     |  |  |
| Renbp    |  |  | Nfatc4    |  |  |
| Rexo2    |  |  | Nfil3     |  |  |
| Rexo4    |  |  | Nfkb1     |  |  |
| Rhog     |  |  | Nfkbie    |  |  |
| Rhoj     |  |  | Nfkbiz    |  |  |
| Rhou     |  |  | Nfx11     |  |  |
| Ripk1    |  |  | Nfya      |  |  |
| Rnasel   |  |  | Ngef      |  |  |
| Rnf141   |  |  | Ngf       |  |  |
| Rnf145   |  |  | Nin       |  |  |
| Rnf19b   |  |  | Nipsnap3a |  |  |
| Rnf213   |  |  | Nkd2      |  |  |
| Rnh1     |  |  | Nktr      |  |  |
| Robo1    |  |  | Nlgn2     |  |  |
| Rock1    |  |  | Nme1      |  |  |
| Rpgrip11 |  |  | Nmt2      |  |  |
| Rpl23a   |  |  | Nol3      |  |  |
| Rpl3     |  |  | Nop58     |  |  |
| Rpn2     |  |  | Notch2    |  |  |
| Rps6ka1  |  |  | Nox4      |  |  |
| Rps6ka3  |  |  | Npc2      |  |  |
| Rras     |  |  | Npdc1     |  |  |
| Rrbp1    |  |  | Npl       |  |  |
| Rrm1     |  |  | Npm1      |  |  |
| Runx1    |  |  | Nppa      |  |  |
| Rusc2    |  |  | Nppb      |  |  |
| Rxfp1    |  |  | Npr3      |  |  |
| S100a10  |  |  | Nr6a1     |  |  |
| S100a11  |  |  | Nrg1      |  |  |
| S100a6   |  |  | Nsdhl     |  |  |
| Samhd1   |  |  | Nt5c      |  |  |
| Sat1     |  |  | Nt5e      |  |  |
| Sbno2    |  |  | Nuak1     |  |  |
| Sc4mol   |  |  | Nuak2     |  |  |
| Scara3   |  |  | Nucb1     |  |  |

|           |  |  |          |  |  |
|-----------|--|--|----------|--|--|
| Scd1      |  |  | Nucb2    |  |  |
| Scn1b     |  |  | Numbl    |  |  |
| Scn7a     |  |  | Nup205   |  |  |
| Scpep1    |  |  | Nup93    |  |  |
| Scrn1     |  |  | Oaf      |  |  |
| Sdc2      |  |  | Oas2     |  |  |
| Sdc3      |  |  | Oasl2    |  |  |
| Sdf211    |  |  | Obscn    |  |  |
| Sec16b    |  |  | Odz3     |  |  |
| Sec23b    |  |  | Ogn      |  |  |
| Sec31a    |  |  | Olfm1    |  |  |
| Sec61a1   |  |  | Olfml1   |  |  |
| Sel11     |  |  | Olfml3   |  |  |
| Sele      |  |  | Omd      |  |  |
| Selp      |  |  | Ophn1    |  |  |
| Selplg    |  |  | Orc2l    |  |  |
| Sema3c    |  |  | Os9      |  |  |
| Sema4a    |  |  | Osbpl5   |  |  |
| Senp2     |  |  | Osbpl9   |  |  |
| Sepn1     |  |  | Ostc     |  |  |
| Sepp1     |  |  | Otub2    |  |  |
| Serinc2   |  |  | P2rx4    |  |  |
| Serp1     |  |  | P2rx7    |  |  |
| Serpina3f |  |  | P4ha1    |  |  |
| Serpinb1a |  |  | P4ha3    |  |  |
| Serpinb9  |  |  | P4hb     |  |  |
| Serpine1  |  |  | Pacs2    |  |  |
| Serpinf1  |  |  | Paf1     |  |  |
| Sertad4   |  |  | Pafah1b2 |  |  |
| Sfpi1     |  |  | Pak2     |  |  |
| Sfrp1     |  |  | Pamr1    |  |  |
| Sfrp2     |  |  | Panx1    |  |  |
| Sfxn3     |  |  | Papd4    |  |  |
| Sgce      |  |  | Papss2   |  |  |
| Sgms2     |  |  | Pard3b   |  |  |
| Sgpl1     |  |  | Parn     |  |  |
| Sh3bgrl   |  |  | Parp3    |  |  |
| Sh3bgrl3  |  |  | Parp9    |  |  |
| Sh3bp2    |  |  | Parva    |  |  |
| Sh3pxd2b  |  |  | Parvg    |  |  |
| Sh3rf3    |  |  | Pbx3     |  |  |
| Shisa4    |  |  | Pcdh9    |  |  |
| Shisa5    |  |  | Pcdhb13  |  |  |
| Siglec1   |  |  | Pcdhb16  |  |  |
| Siglece   |  |  | Pcnp     |  |  |
| Sigmar1   |  |  | Pcnx13   |  |  |
| Sirpa     |  |  | Pcolce2  |  |  |
| Skap2     |  |  | Pesk5    |  |  |
| Ski       |  |  | Pcyox1   |  |  |
| Skil      |  |  | Pdcd4    |  |  |
| Sla       |  |  | Pdcd6ip  |  |  |
| Slc11a1   |  |  | Pde10a   |  |  |
| Slc15a3   |  |  | Pde1a    |  |  |
| Slc1a5    |  |  | Pde5a    |  |  |
| Slc22a4   |  |  | Pde7b    |  |  |
| Slc25a24  |  |  | Pdgfc    |  |  |
| Slc25a45  |  |  | Pdgfra   |  |  |
| Slc29a3   |  |  | Pdgfrb   |  |  |
| Slc2a1    |  |  | Pdgfrl   |  |  |
| Slc30a4   |  |  | Pdia3    |  |  |
| Slc35b4   |  |  | Pdia6    |  |  |
| Slc38a1   |  |  | Pdk3     |  |  |
| Slc39a1   |  |  | Pdlim7   |  |  |
| Slc39a6   |  |  | Pdzd11   |  |  |
| Slc3a2    |  |  | Pea15a   |  |  |
| Slc41a2   |  |  | Peg10    |  |  |
| Slc44a1   |  |  | Pemt     |  |  |
| Slc6a9    |  |  | Pes1     |  |  |
| Slc7a11   |  |  | Pfkfb3   |  |  |

|         |  |  |          |  |  |
|---------|--|--|----------|--|--|
| Slc7a5  |  |  | Pfkfb4   |  |  |
| Slc7a7  |  |  | Pfkf1    |  |  |
| Slc7a8  |  |  | Pgam1    |  |  |
| Slc9a3  |  |  | Pgcp     |  |  |
| Slc9a7  |  |  | Pgd      |  |  |
| Slco2a1 |  |  | Pgm1     |  |  |
| Slit2   |  |  | Pgm3     |  |  |
| Smad1   |  |  | Phf21a   |  |  |
| Smc2    |  |  | Phgdh    |  |  |
| Smc4    |  |  | Phlda3   |  |  |
| Snai1   |  |  | Phldb2   |  |  |
| Sneg    |  |  | Phtf1    |  |  |
| Sntb2   |  |  | Pi15     |  |  |
| Snx1    |  |  | Pi4k2a   |  |  |
| Snx10   |  |  | Pias3    |  |  |
| Snx7    |  |  | Pjgb     |  |  |
| Snx8    |  |  | Pigt     |  |  |
| Soat1   |  |  | Pik3ap1  |  |  |
| Socs2   |  |  | Pik3c2a  |  |  |
| Sod3    |  |  | Pik3cg   |  |  |
| Sox5    |  |  | Pik3r5   |  |  |
| Sp140   |  |  | Pikfyve  |  |  |
| Spare   |  |  | Pip4k2a  |  |  |
| Spata6  |  |  | Pisd-ps1 |  |  |
| Sprr1a  |  |  | Pkd2     |  |  |
| Sptlc2  |  |  | Pknox2   |  |  |
| Srd5a3  |  |  | Pla1a    |  |  |
| Srpx    |  |  | Pla2g15  |  |  |
| Srpx2   |  |  | Pla2g4a  |  |  |
| Srxn1   |  |  | Pla2g7   |  |  |
| Ssfa2   |  |  | Pla2r1   |  |  |
| Ssh3    |  |  | Plaa     |  |  |
| Ssr2    |  |  | Plac9    |  |  |
| St6gal1 |  |  | Plag1    |  |  |
| Stab1   |  |  | Plcb1    |  |  |
| Stat3   |  |  | Plce1    |  |  |
| Stim2   |  |  | Plcg2    |  |  |
| Stk17b  |  |  | Pld1     |  |  |
| Stk32b  |  |  | Pld3     |  |  |
| Stk38   |  |  | Pld4     |  |  |
| Stk38l  |  |  | Pldn     |  |  |
| Strn    |  |  | Plekha4  |  |  |
| Stt3a   |  |  | Plekhg2  |  |  |
| Stx11   |  |  | Plekho1  |  |  |
| Stx2    |  |  | Plekho2  |  |  |
| Stxbp1  |  |  | Plk2     |  |  |
| Stxbp4  |  |  | Plod2    |  |  |
| Sulf1   |  |  | Plp2     |  |  |
| Supt16h |  |  | Pls3     |  |  |
| Susd2   |  |  | Pltp     |  |  |
| Svep1   |  |  | Plvap    |  |  |
| Syk     |  |  | Plxdc2   |  |  |
| Synj1   |  |  | Plxna3   |  |  |
| Synm    |  |  | Plxna4   |  |  |
| Synpo   |  |  | Plxnb2   |  |  |
| Syt11   |  |  | Plxnc1   |  |  |
| Tagln2  |  |  | Pmepa1   |  |  |
| Tanc2   |  |  | Pml      |  |  |
| Taok3   |  |  | Pmm1     |  |  |
| Tapbp   |  |  | Pmp22    |  |  |
| Tbc1d14 |  |  | Podn     |  |  |
| Tbc1d19 |  |  | Pola1    |  |  |
| Tbc1d8b |  |  | Pold4    |  |  |
| Tbc1d9  |  |  | Pole3    |  |  |
| Tbx15   |  |  | Polr3e   |  |  |
| Tbx20   |  |  | Pon2     |  |  |
| Tcf12   |  |  | Pon3     |  |  |
| Tcf21   |  |  | Postn    |  |  |
| Tcirg1  |  |  | Ppap2b   |  |  |



|           |  |  |          |  |  |
|-----------|--|--|----------|--|--|
| Tcn2      |  |  | Ppap2c   |  |  |
| Tctn2     |  |  | Ppapdc1b |  |  |
| Tep1      |  |  | Ppfia1   |  |  |
| Tgfb2     |  |  | Ppfbp1   |  |  |
| Tgfb3     |  |  | Ppia     |  |  |
| Tgfb1     |  |  | Ppib     |  |  |
| Tgibr1    |  |  | Ppic     |  |  |
| Tgibr2    |  |  | Ppm1m    |  |  |
| Tgif1     |  |  | Ppp1r3c  |  |  |
| Tgm2      |  |  | Ppp1r9b  |  |  |
| Thbs2     |  |  | Pqlc3    |  |  |
| Thbs3     |  |  | Praf2    |  |  |
| Thbs4     |  |  | Prc1     |  |  |
| Thsd7a    |  |  | Prdx4    |  |  |
| Tiam1     |  |  | Preli1   |  |  |
| Tifab     |  |  | Prelp    |  |  |
| Timp1     |  |  | Prex1    |  |  |
| Tjp2      |  |  | Prg4     |  |  |
| Tle3      |  |  | Prh1     |  |  |
| Tlr2      |  |  | Prim1    |  |  |
| Tlr3      |  |  | Prim2    |  |  |
| Tlr8      |  |  | Prkab2   |  |  |
| Tm6sf1    |  |  | Prkar1a  |  |  |
| Tmbim1    |  |  | Prkca    |  |  |
| Tmem106a  |  |  | Prkcb    |  |  |
| Tmem119   |  |  | Prkcd    |  |  |
| Tmem167   |  |  | Prkcdbp  |  |  |
| Tmem173   |  |  | Prkci    |  |  |
| Tmem176b  |  |  | Prkcsh   |  |  |
| Tmem183a  |  |  | Prkd3    |  |  |
| Tmem184c  |  |  | Prmt2    |  |  |
| Tmem195   |  |  | Prrg3    |  |  |
| Tmem2     |  |  | Prrx2    |  |  |
| Tmem209   |  |  | Prune2   |  |  |
| Tmem39a   |  |  | Psm8     |  |  |
| Tmem43    |  |  | Ptbp1    |  |  |
| Tmem45a   |  |  | Ptger4   |  |  |
| Tmem50a   |  |  | Ptges    |  |  |
| Tmem97    |  |  | Ptgfrn   |  |  |
| Tmsb10    |  |  | Ptgis    |  |  |
| Tnc       |  |  | Ptgs1    |  |  |
| Tnfrsf1a  |  |  | Ptgs2    |  |  |
| Tnfrsf13b |  |  | Pth1r    |  |  |
| Tnip1     |  |  | Ptk2b    |  |  |
| Tnip2     |  |  | Ptms     |  |  |
| Tns3      |  |  | Ptn      |  |  |
| Tpcn2     |  |  | Ptplad2  |  |  |
| Tpd52     |  |  | Ptpn1    |  |  |
| Tpm3      |  |  | Ptpn12   |  |  |
| Tpm4      |  |  | Ptpn13   |  |  |
| Tpp1      |  |  | Ptpn23   |  |  |
| Tpx2      |  |  | Ptpra    |  |  |
| Tram1     |  |  | Ptprf    |  |  |
| Tram2     |  |  | Ptrh1    |  |  |
| Trf       |  |  | Pvrl1    |  |  |
| Trim21    |  |  | Pvrl3    |  |  |
| Trim30    |  |  | Pvt1     |  |  |
| Trim41    |  |  | Pycr1    |  |  |
| Trim47    |  |  | Qpct     |  |  |
| Trps1     |  |  | Qser1    |  |  |
| Trpv2     |  |  | Qsox1    |  |  |
| Trpv4     |  |  | R3hcc1   |  |  |
| Tspan17   |  |  | Rab31    |  |  |
| Tspan5    |  |  | Rab34    |  |  |
| Tsr1      |  |  | Rab3d    |  |  |
| Tssc1     |  |  | Rab3gap2 |  |  |
| Ttc26     |  |  | Rab3il1  |  |  |
| Ttc37     |  |  | Rab43    |  |  |
| Ttc8      |  |  | Rab4b    |  |  |

|         |  |  |          |  |  |
|---------|--|--|----------|--|--|
| Ttl12   |  |  | Rab5c    |  |  |
| Ttl3    |  |  | Rab711   |  |  |
| Ttl7    |  |  | Rab8a    |  |  |
| Tuba1a  |  |  | Rab8b    |  |  |
| Tuba1b  |  |  | Rab15    |  |  |
| Tuba1c  |  |  | Rad18    |  |  |
| Tubb2a  |  |  | Rad50    |  |  |
| Tubb5   |  |  | Rad9     |  |  |
| Tubgcp4 |  |  | Rag1ap1  |  |  |
| Twf1    |  |  | Rai14    |  |  |
| Txndc5  |  |  | Rangap1  |  |  |
| Txnip   |  |  | Rap1b    |  |  |
| Txnrd1  |  |  | Raph1    |  |  |
| Uap111  |  |  | Rasa3    |  |  |
| Ubxn4   |  |  | Rasgef1a |  |  |
| Uchl1   |  |  | Rasl11b  |  |  |
| Uck2    |  |  | Rb11     |  |  |
| Ucp2    |  |  | Rbm3     |  |  |
| Ufm1    |  |  | Rbm47    |  |  |
| Ufsp2   |  |  | Rbm7     |  |  |
| Ugcgl2  |  |  | Rbms3    |  |  |
| Ugdh    |  |  | Rbp1     |  |  |
| Ugp2    |  |  | Rbpj     |  |  |
| Unc13b  |  |  | Rcn1     |  |  |
| Unc93b1 |  |  | Rdh11    |  |  |
| Uprt    |  |  | Reck     |  |  |
| Uso1    |  |  | Recql    |  |  |
| Usp16   |  |  | Relb     |  |  |
| Ust     |  |  | Renbp    |  |  |
| Uvrag   |  |  | Reps2    |  |  |
| Vat1    |  |  | Rftn2    |  |  |
| Vcam1   |  |  | Rgs10    |  |  |
| Vcan    |  |  | Rgs11    |  |  |
| Vgll2   |  |  | Rgs19    |  |  |
| Vim     |  |  | Rhbdf1   |  |  |
| Vit     |  |  | Rhog     |  |  |
| Vkorc1  |  |  | Rhoj     |  |  |
| Vwa5a   |  |  | Rhou     |  |  |
| Vwf     |  |  | Ric3     |  |  |
| Wdfy4   |  |  | Rnasel   |  |  |
| Wdr19   |  |  | Rnd1     |  |  |
| Wdr44   |  |  | Rnf141   |  |  |
| Wipf1   |  |  | Rnf145   |  |  |
| Wisp2   |  |  | Rnf149   |  |  |
| Xylt1   |  |  | Rnf19b   |  |  |
| Yipf5   |  |  | Rnf2     |  |  |
| Ywhah   |  |  | Rnf213   |  |  |
| Zc3hav1 |  |  | Rnft1    |  |  |
| Zcchc7  |  |  | Rnh1     |  |  |
| Zdhhc2  |  |  | Robo1    |  |  |
| Zdhhc20 |  |  | Rock1    |  |  |
| Zdhhc23 |  |  | Rod1     |  |  |
| Zfc3h1  |  |  | Rp2h     |  |  |
| Zfp3612 |  |  | Rpe      |  |  |
| Zfp423  |  |  | Rpl23a   |  |  |
| Zfp521  |  |  | Rpl3     |  |  |
| Zyx     |  |  | Rpl39    |  |  |
|         |  |  | Rpn2     |  |  |
|         |  |  | Rps12    |  |  |
|         |  |  | Rps6ka3  |  |  |
|         |  |  | Rras     |  |  |
|         |  |  | Rrbp1    |  |  |
|         |  |  | Rrm1     |  |  |
|         |  |  | Rrm2     |  |  |
|         |  |  | Rrp12    |  |  |
|         |  |  | Rsu1     |  |  |
|         |  |  | Rtp4     |  |  |
|         |  |  | Runx1    |  |  |
|         |  |  | Runx2    |  |  |

|  |  |  |           |  |  |
|--|--|--|-----------|--|--|
|  |  |  | Rusc2     |  |  |
|  |  |  | Ryr3      |  |  |
|  |  |  | Samd4     |  |  |
|  |  |  | Samd4b    |  |  |
|  |  |  | Sardh     |  |  |
|  |  |  | Sars      |  |  |
|  |  |  | Sash1     |  |  |
|  |  |  | Sat1      |  |  |
|  |  |  | Sbno2     |  |  |
|  |  |  | Sc4mol    |  |  |
|  |  |  | Scara3    |  |  |
|  |  |  | Scarf2    |  |  |
|  |  |  | Scd1      |  |  |
|  |  |  | Scd2      |  |  |
|  |  |  | Scn1b     |  |  |
|  |  |  | Scn7a     |  |  |
|  |  |  | Scrn1     |  |  |
|  |  |  | Sdc1      |  |  |
|  |  |  | Sdc2      |  |  |
|  |  |  | Sdc3      |  |  |
|  |  |  | Sdc4      |  |  |
|  |  |  | Sec11a    |  |  |
|  |  |  | Sec11c    |  |  |
|  |  |  | Sec16b    |  |  |
|  |  |  | Sec23b    |  |  |
|  |  |  | Sec24d    |  |  |
|  |  |  | Sel11     |  |  |
|  |  |  | Selp      |  |  |
|  |  |  | Sema3b    |  |  |
|  |  |  | Sema3c    |  |  |
|  |  |  | Sema3d    |  |  |
|  |  |  | Senp2     |  |  |
|  |  |  | Sepp1     |  |  |
|  |  |  | Serf2     |  |  |
|  |  |  | Serinc2   |  |  |
|  |  |  | Serp1     |  |  |
|  |  |  | Serpinb1a |  |  |
|  |  |  | Serpinb1c |  |  |
|  |  |  | Serpinb6a |  |  |
|  |  |  | Serpine1  |  |  |
|  |  |  | Serpinf1  |  |  |
|  |  |  | Serping1  |  |  |
|  |  |  | Sertad4   |  |  |
|  |  |  | Setbp1    |  |  |
|  |  |  | Sfpi1     |  |  |
|  |  |  | Sfrp2     |  |  |
|  |  |  | Sfrp4     |  |  |
|  |  |  | Sfxn1     |  |  |
|  |  |  | Sgce      |  |  |
|  |  |  | Sgms2     |  |  |
|  |  |  | Sgp11     |  |  |
|  |  |  | Sgsh      |  |  |
|  |  |  | Sh3bgr1   |  |  |
|  |  |  | Sh3bgr13  |  |  |
|  |  |  | Sh3bp2    |  |  |
|  |  |  | Sh3kbp1   |  |  |
|  |  |  | Sh3pxd2b  |  |  |
|  |  |  | Sh3rf3    |  |  |
|  |  |  | Shc1      |  |  |
|  |  |  | Shc2      |  |  |
|  |  |  | Shisa3    |  |  |
|  |  |  | Shisa4    |  |  |
|  |  |  | Shisa5    |  |  |
|  |  |  | Shkbp1    |  |  |
|  |  |  | Shroom3   |  |  |
|  |  |  | Siglec1   |  |  |
|  |  |  | Siglece   |  |  |
|  |  |  | Sigmar1   |  |  |

|  |  |  |          |  |  |  |
|--|--|--|----------|--|--|--|
|  |  |  | Sipa111  |  |  |  |
|  |  |  | Sirpa    |  |  |  |
|  |  |  | Skap2    |  |  |  |
|  |  |  | Ski      |  |  |  |
|  |  |  | Skil     |  |  |  |
|  |  |  | Slamf9   |  |  |  |
|  |  |  | Slc10a7  |  |  |  |
|  |  |  | Slc13a4  |  |  |  |
|  |  |  | Slc15a3  |  |  |  |
|  |  |  | Slc16a2  |  |  |  |
|  |  |  | Slc16a6  |  |  |  |
|  |  |  | Slc17a5  |  |  |  |
|  |  |  | Slc1a1   |  |  |  |
|  |  |  | Slc1a2   |  |  |  |
|  |  |  | Slc1a3   |  |  |  |
|  |  |  | Slc1a5   |  |  |  |
|  |  |  | Slc20a1  |  |  |  |
|  |  |  | Slc22a4  |  |  |  |
|  |  |  | Slc25a1  |  |  |  |
|  |  |  | Slc25a17 |  |  |  |
|  |  |  | Slc25a24 |  |  |  |
|  |  |  | Slc25a45 |  |  |  |
|  |  |  | Slc29a3  |  |  |  |
|  |  |  | Slc2a1   |  |  |  |
|  |  |  | Slc2a10  |  |  |  |
|  |  |  | Slc2a13  |  |  |  |
|  |  |  | Slc30a4  |  |  |  |
|  |  |  | Slc35d2  |  |  |  |
|  |  |  | Slc36a4  |  |  |  |
|  |  |  | Slc37a2  |  |  |  |
|  |  |  | Slc38a1  |  |  |  |
|  |  |  | Slc39a1  |  |  |  |
|  |  |  | Slc39a6  |  |  |  |
|  |  |  | Slc3a2   |  |  |  |
|  |  |  | Slc41a2  |  |  |  |
|  |  |  | Slc43a2  |  |  |  |
|  |  |  | Slc44a1  |  |  |  |
|  |  |  | Slc5a3   |  |  |  |
|  |  |  | Slc6a6   |  |  |  |
|  |  |  | Slc7a11  |  |  |  |
|  |  |  | Slc7a2   |  |  |  |
|  |  |  | Slc7a8   |  |  |  |
|  |  |  | Slc9a3   |  |  |  |
|  |  |  | Slc9a9   |  |  |  |
|  |  |  | Slco2a1  |  |  |  |
|  |  |  | Slit2    |  |  |  |
|  |  |  | Slit3    |  |  |  |
|  |  |  | Smad1    |  |  |  |
|  |  |  | Smap1    |  |  |  |
|  |  |  | Smc2     |  |  |  |
|  |  |  | Smo      |  |  |  |
|  |  |  | Smoc1    |  |  |  |
|  |  |  | Smurf2   |  |  |  |
|  |  |  | Snai1    |  |  |  |
|  |  |  | Snhg1    |  |  |  |
|  |  |  | Sntb2    |  |  |  |
|  |  |  | Snx1     |  |  |  |
|  |  |  | Snx10    |  |  |  |
|  |  |  | Snx29    |  |  |  |
|  |  |  | Snx6     |  |  |  |
|  |  |  | Snx7     |  |  |  |
|  |  |  | Snx9     |  |  |  |
|  |  |  | Soat1    |  |  |  |
|  |  |  | Sod3     |  |  |  |
|  |  |  | Sorbs2   |  |  |  |
|  |  |  | Sox5     |  |  |  |
|  |  |  | Sox9     |  |  |  |
|  |  |  | Sp140    |  |  |  |
|  |  |  | Spata6   |  |  |  |

|  |  |  |         |  |  |  |
|--|--|--|---------|--|--|--|
|  |  |  | Spats2  |  |  |  |
|  |  |  | Spes3   |  |  |  |
|  |  |  | Spg21   |  |  |  |
|  |  |  | Sphk1   |  |  |  |
|  |  |  | Spire1  |  |  |  |
|  |  |  | Spna2   |  |  |  |
|  |  |  | Spns2   |  |  |  |
|  |  |  | Spon1   |  |  |  |
|  |  |  | Spon2   |  |  |  |
|  |  |  | Spred1  |  |  |  |
|  |  |  | Sprr1a  |  |  |  |
|  |  |  | Spry1   |  |  |  |
|  |  |  | Sptlc2  |  |  |  |
|  |  |  | Sqle    |  |  |  |
|  |  |  | Sqstm1  |  |  |  |
|  |  |  | Srbd1   |  |  |  |
|  |  |  | Srd5a3  |  |  |  |
|  |  |  | Srebf2  |  |  |  |
|  |  |  | Srgap2  |  |  |  |
|  |  |  | Srgap3  |  |  |  |
|  |  |  | Sri     |  |  |  |
|  |  |  | Srpx    |  |  |  |
|  |  |  | Srpx2   |  |  |  |
|  |  |  | Srxn1   |  |  |  |
|  |  |  | Ssfa2   |  |  |  |
|  |  |  | Ssh3    |  |  |  |
|  |  |  | Ssu72   |  |  |  |
|  |  |  | St3gal2 |  |  |  |
|  |  |  | St6gal1 |  |  |  |
|  |  |  | Stam2   |  |  |  |
|  |  |  | Star    |  |  |  |
|  |  |  | Stard5  |  |  |  |
|  |  |  | Stim2   |  |  |  |
|  |  |  | Stk3    |  |  |  |
|  |  |  | Stk32b  |  |  |  |
|  |  |  | Stk38l  |  |  |  |
|  |  |  | Ston1   |  |  |  |
|  |  |  | Strn    |  |  |  |
|  |  |  | Stt3a   |  |  |  |
|  |  |  | Stt3b   |  |  |  |
|  |  |  | Stx2    |  |  |  |
|  |  |  | Stxbp1  |  |  |  |
|  |  |  | Sugt1   |  |  |  |
|  |  |  | Sulf1   |  |  |  |
|  |  |  | Sumf1   |  |  |  |
|  |  |  | Supt5h  |  |  |  |
|  |  |  | Susd2   |  |  |  |
|  |  |  | Svep1   |  |  |  |
|  |  |  | Syk     |  |  |  |
|  |  |  | Synj1   |  |  |  |
|  |  |  | Synm    |  |  |  |
|  |  |  | Synpo   |  |  |  |
|  |  |  | Syt11   |  |  |  |
|  |  |  | Tacc3   |  |  |  |
|  |  |  | Taf1    |  |  |  |
|  |  |  | Tagln2  |  |  |  |
|  |  |  | Tanc2   |  |  |  |
|  |  |  | Tapbp   |  |  |  |
|  |  |  | Tax1bp3 |  |  |  |
|  |  |  | Tbc1d14 |  |  |  |
|  |  |  | Tbc1d19 |  |  |  |
|  |  |  | Tbc1d2b |  |  |  |
|  |  |  | Tbc1d8b |  |  |  |
|  |  |  | Tbcd    |  |  |  |
|  |  |  | Tbcel   |  |  |  |
|  |  |  | Tbl1x   |  |  |  |
|  |  |  | Tbx15   |  |  |  |
|  |  |  | Tbx20   |  |  |  |
|  |  |  | Tc2n    |  |  |  |

|  |  |  |           |  |  |  |
|--|--|--|-----------|--|--|--|
|  |  |  | Tcea1     |  |  |  |
|  |  |  | Tceb3     |  |  |  |
|  |  |  | Tcf12     |  |  |  |
|  |  |  | Tcf21     |  |  |  |
|  |  |  | Tcf3      |  |  |  |
|  |  |  | Tcfe3     |  |  |  |
|  |  |  | Tcirg1    |  |  |  |
|  |  |  | Tcn2      |  |  |  |
|  |  |  | Tep1      |  |  |  |
|  |  |  | Tgfb1     |  |  |  |
|  |  |  | Tgfb1i1   |  |  |  |
|  |  |  | Tgfb2     |  |  |  |
|  |  |  | Tgfb3     |  |  |  |
|  |  |  | Tgfb1     |  |  |  |
|  |  |  | Tgibr1    |  |  |  |
|  |  |  | Tgibr2    |  |  |  |
|  |  |  | Tgif1     |  |  |  |
|  |  |  | Tgm2      |  |  |  |
|  |  |  | Thbs1     |  |  |  |
|  |  |  | Thbs2     |  |  |  |
|  |  |  | Thbs3     |  |  |  |
|  |  |  | Thbs4     |  |  |  |
|  |  |  | Thsd7a    |  |  |  |
|  |  |  | Tiam1     |  |  |  |
|  |  |  | Tiam2     |  |  |  |
|  |  |  | Tifab     |  |  |  |
|  |  |  | Tjp2      |  |  |  |
|  |  |  | Tle3      |  |  |  |
|  |  |  | Tln1      |  |  |  |
|  |  |  | Tlr13     |  |  |  |
|  |  |  | Tlr2      |  |  |  |
|  |  |  | Tlr4      |  |  |  |
|  |  |  | Tlr8      |  |  |  |
|  |  |  | Tm7sf3    |  |  |  |
|  |  |  | Tm9sf3    |  |  |  |
|  |  |  | Tmbim1    |  |  |  |
|  |  |  | Tmed10    |  |  |  |
|  |  |  | Tmem104   |  |  |  |
|  |  |  | Tmem119   |  |  |  |
|  |  |  | Tmem123   |  |  |  |
|  |  |  | Tmem138   |  |  |  |
|  |  |  | Tmem144   |  |  |  |
|  |  |  | Tmem167   |  |  |  |
|  |  |  | Tmem173   |  |  |  |
|  |  |  | Tmem176b  |  |  |  |
|  |  |  | Tmem183a  |  |  |  |
|  |  |  | Tmem184b  |  |  |  |
|  |  |  | Tmem184c  |  |  |  |
|  |  |  | Tmem195   |  |  |  |
|  |  |  | Tmem2     |  |  |  |
|  |  |  | Tmem209   |  |  |  |
|  |  |  | Tmem219   |  |  |  |
|  |  |  | Tmem45a   |  |  |  |
|  |  |  | Tmem49    |  |  |  |
|  |  |  | Tmem50a   |  |  |  |
|  |  |  | Tmem62    |  |  |  |
|  |  |  | Tmem97    |  |  |  |
|  |  |  | Tmsb10    |  |  |  |
|  |  |  | Tmsb4x    |  |  |  |
|  |  |  | Tnfaip3   |  |  |  |
|  |  |  | Tnfaip6   |  |  |  |
|  |  |  | Tnfrsf12a |  |  |  |
|  |  |  | Tnfrsf1a  |  |  |  |
|  |  |  | Tnfrsf1b  |  |  |  |
|  |  |  | Tnfp1     |  |  |  |
|  |  |  | Tnxb      |  |  |  |
|  |  |  | Topbp1    |  |  |  |
|  |  |  | Tor3a     |  |  |  |
|  |  |  | Tpcn2     |  |  |  |

|  |  |  |           |  |  |  |
|--|--|--|-----------|--|--|--|
|  |  |  | Tpd52     |  |  |  |
|  |  |  | Tpm3      |  |  |  |
|  |  |  | Tpm4      |  |  |  |
|  |  |  | Tpx2      |  |  |  |
|  |  |  | Traf3     |  |  |  |
|  |  |  | Traf7     |  |  |  |
|  |  |  | Tram1     |  |  |  |
|  |  |  | Trerf1    |  |  |  |
|  |  |  | Trim2     |  |  |  |
|  |  |  | Trim30    |  |  |  |
|  |  |  | Trim37    |  |  |  |
|  |  |  | Trim41    |  |  |  |
|  |  |  | Trim44    |  |  |  |
|  |  |  | Trim47    |  |  |  |
|  |  |  | Trip13    |  |  |  |
|  |  |  | Trove2    |  |  |  |
|  |  |  | Trp53     |  |  |  |
|  |  |  | Trps1     |  |  |  |
|  |  |  | Trpv2     |  |  |  |
|  |  |  | Tspan17   |  |  |  |
|  |  |  | Tspan5    |  |  |  |
|  |  |  | Tspan6    |  |  |  |
|  |  |  | Tspan9    |  |  |  |
|  |  |  | Tsr1      |  |  |  |
|  |  |  | Tssc1     |  |  |  |
|  |  |  | Tssc4     |  |  |  |
|  |  |  | Ttbk2     |  |  |  |
|  |  |  | Ttc37     |  |  |  |
|  |  |  | Ttc8      |  |  |  |
|  |  |  | Ttc9      |  |  |  |
|  |  |  | Ttl12     |  |  |  |
|  |  |  | Ttl7      |  |  |  |
|  |  |  | Ttyh3     |  |  |  |
|  |  |  | Tuba1a    |  |  |  |
|  |  |  | Tuba1b    |  |  |  |
|  |  |  | Tuba1c    |  |  |  |
|  |  |  | Tubb2a    |  |  |  |
|  |  |  | Tubb2b    |  |  |  |
|  |  |  | Tubb6     |  |  |  |
|  |  |  | Tubgcp4   |  |  |  |
|  |  |  | Tulp3     |  |  |  |
|  |  |  | Tulp4     |  |  |  |
|  |  |  | Txndc16   |  |  |  |
|  |  |  | Txndc5    |  |  |  |
|  |  |  | Txnrd1    |  |  |  |
|  |  |  | Tyk2      |  |  |  |
|  |  |  | Tyms      |  |  |  |
|  |  |  | Uap111    |  |  |  |
|  |  |  | Ube2e2    |  |  |  |
|  |  |  | Ube2l6    |  |  |  |
|  |  |  | Ubt2      |  |  |  |
|  |  |  | Ubxn4     |  |  |  |
|  |  |  | Ufm1      |  |  |  |
|  |  |  | Ufsp2     |  |  |  |
|  |  |  | Ugcgl2    |  |  |  |
|  |  |  | Ugdh      |  |  |  |
|  |  |  | Uhrf1     |  |  |  |
|  |  |  | Uhrf1bp11 |  |  |  |
|  |  |  | Ulk3      |  |  |  |
|  |  |  | Unc13b    |  |  |  |
|  |  |  | Unc5b     |  |  |  |
|  |  |  | Uprt      |  |  |  |
|  |  |  | Uso1      |  |  |  |
|  |  |  | Usp16     |  |  |  |
|  |  |  | Usp47     |  |  |  |
|  |  |  | Usp6nl    |  |  |  |
|  |  |  | Ust       |  |  |  |
|  |  |  | Uvrag     |  |  |  |
|  |  |  | Vamp7     |  |  |  |

|  |  |  |         |  |  |  |
|--|--|--|---------|--|--|--|
|  |  |  | Vat1    |  |  |  |
|  |  |  | Vav3    |  |  |  |
|  |  |  | Vcam1   |  |  |  |
|  |  |  | Vcan    |  |  |  |
|  |  |  | Vegfc   |  |  |  |
|  |  |  | Vgll2   |  |  |  |
|  |  |  | Vgll3   |  |  |  |
|  |  |  | Vit     |  |  |  |
|  |  |  | Vkorc1  |  |  |  |
|  |  |  | Vrk2    |  |  |  |
|  |  |  | Vwa5a   |  |  |  |
|  |  |  | Vwf     |  |  |  |
|  |  |  | Wbp5    |  |  |  |
|  |  |  | Wdfy1   |  |  |  |
|  |  |  | Wdfy4   |  |  |  |
|  |  |  | Wdr19   |  |  |  |
|  |  |  | Wdr44   |  |  |  |
|  |  |  | Wdr47   |  |  |  |
|  |  |  | Wdr67   |  |  |  |
|  |  |  | Wisp2   |  |  |  |
|  |  |  | Wwp2    |  |  |  |
|  |  |  | Wwtr1   |  |  |  |
|  |  |  | Xirp2   |  |  |  |
|  |  |  | Xpot    |  |  |  |
|  |  |  | Xylt1   |  |  |  |
|  |  |  | Yars    |  |  |  |
|  |  |  | Yipf1   |  |  |  |
|  |  |  | Yipf5   |  |  |  |
|  |  |  | Ywhab   |  |  |  |
|  |  |  | Ywhah   |  |  |  |
|  |  |  | Zbtb7c  |  |  |  |
|  |  |  | Zc3h7a  |  |  |  |
|  |  |  | Zc3hav1 |  |  |  |
|  |  |  | Zc4h2   |  |  |  |
|  |  |  | Zcche24 |  |  |  |
|  |  |  | Zcche7  |  |  |  |
|  |  |  | Zdhhc20 |  |  |  |
|  |  |  | Zdhhc24 |  |  |  |
|  |  |  | Zeb2    |  |  |  |
|  |  |  | Zfc3h1  |  |  |  |
|  |  |  | Zfhx3   |  |  |  |
|  |  |  | Zfp260  |  |  |  |
|  |  |  | Zfp354c |  |  |  |
|  |  |  | Zfp3612 |  |  |  |
|  |  |  | Zfp423  |  |  |  |
|  |  |  | Zfp521  |  |  |  |
|  |  |  | Zmiz1   |  |  |  |
|  |  |  | Zswim4  |  |  |  |
|  |  |  | Zyx     |  |  |  |

| GLY 3 months X GLY 6 months comparison  |                                         |                         | ARG 3 months X ARG 6 months comparison  |                                         |                         | All genotypes/time points |
|-----------------------------------------|-----------------------------------------|-------------------------|-----------------------------------------|-----------------------------------------|-------------------------|---------------------------|
| Uniquely Down-regulated in GLY 6 months | Uniquely Down-regulated in GLY 3 months | Commonly Down-regulated | Uniquely Down-regulated in ARG 6 months | Uniquely Down-regulated in ARG 3 months | Commonly Down-regulated | Commonly Down-regulated   |
| Aadacl1                                 | Abcc1                                   | A2bp1                   | Aadacl1                                 | Abat                                    | A2bp1                   | A2bp1                     |
| Aamp                                    | Acta1                                   | Abcd2                   | Aamp                                    | Abcc1                                   | Abca6                   | Abcd2                     |
| Aarsd1                                  | Adam24                                  | Abhd1                   | Aarsd1                                  | Acta1                                   | Abcc8                   | Abhd1                     |
| Aasdhppt                                | Adamts6                                 | Acadm                   | Aarsd1                                  | Adamts6                                 | Abcd2                   | Acadm                     |
| Abca12                                  | Agpat2                                  | Acat1                   | Aasdhppt                                | Akap5                                   | Abhd1                   | Acat1                     |
| Abca6                                   | Agxt2l2                                 | Acot1                   | Abca12                                  | Amph                                    | Acaa2                   | Acot1                     |
| Abcb10                                  | Akap11                                  | Acot2                   | Abca3                                   | Aplp2                                   | Acad8                   | Acsf2                     |
| Abcb8                                   | Akap5                                   | Acsf2                   | Abcb10                                  | Apol10b                                 | Acadm                   | Actr3b                    |
| Abcb9                                   | Akr1c14                                 | Actr3b                  | Abcb4                                   | Arap2                                   | Acadv1                  | Adhfe1                    |
| Abcc8                                   | Akr1c19                                 | Adhfe1                  | Abcb8                                   | Arl6ip6                                 | Acat1                   | Adk                       |
| Abcc9                                   | Aldh7a1                                 | Adk                     | Abcb9                                   | Asap3                                   | Acot1                   | Adra1a                    |
| Abcd3                                   | Aldh9a1                                 | Adra1a                  | Abcc9                                   | Atf7ip                                  | Acsf2                   | Agpat9                    |
| Abhd10                                  | Ankrd10                                 | Agpat9                  | Abcd1                                   | Atm                                     | Acs11                   | Agtr1a                    |



|           |            |          |          |          |          |          |
|-----------|------------|----------|----------|----------|----------|----------|
| Ablim1    | Ankrd12    | Agtr1a   | Abcd3    | B3gnt3   | Actr3b   | Aldh2    |
| Acaa2     | Ano4       | Aldh2    | Abhd10   | Bat2l    | Acy3     | Art3     |
| Acacb     | Ap1p2      | Ankrd33b | Abhd11   | Bhlhe41  | Adhfe1   | Asb5     |
| Acads     | Arap2      | Art3     | Abhd5    | Cacna2d1 | Adi1     | Atp8a1   |
| Acadv1    | Arhgef9    | Asb5     | Abhd6    | Camk2d   | Adk      | B3galt2  |
| Acot7     | Atf7ip     | Atp8a1   | Abhd8    | Ccdc28a  | Adra1a   | Bcat2    |
| Acp6      | Atr        | B3galt2  | Ablim1   | Cd300e   | Agpat2   | Bckdha   |
| Acsf3     | Bach2      | Bcap29   | Ablim2   | Cd59a    | Agpat9   | Bcl9     |
| Acs11     | Bbs2       | Bcat2    | Abtb1    | Cdc42ep2 | Agtr1a   | Calcoco1 |
| Acsm5     | Bmp4       | Bckdha   | Acacb    | Cdc42ep3 | Akr1b3   | Cand2    |
| Acss1     | Cacna1g    | Bcl9     | Acad11   | Cdh13    | Alad     | Capn3    |
| Acy1      | Cacna2d1   | Calcoco1 | Acad9    | Cenpp    | Aldh2    | Casq1    |
| Acy3      | Camk2d     | Camta1   | Acadl    | Chmp4c   | Aldh4a1  | Ccdc21   |
| Acyp2     | Car3       | Cand2    | Acads    | Clasp1   | Aldh6a1  | Cdkl1    |
| Adam1b    | Carf       | Capn3    | Aco2     | Colq     | Angpt1   | Cecr2    |
| Adamts3   | Cd1d1      | Casq1    | Acot11   | Comt1    | Ankrd32  | Ces3     |
| Adamts7   | Cd274      | Ccdc21   | Acot13   | Crot     | Ano4     | Cirbp    |
| Adck1     | Cdh13      | Cdk11    | Acot2    | Cry2     | Ano5     | Clen3    |
| Adcy6     | Cenpp      | Cecr2    | Acot7    | Cyb5d2   | Aqp7     | Coro6    |
| Adi1      | Chmp4c     | Ces3     | Acox1    | Dach1    | Arhgap20 | Cxadr    |
| Adprhl1   | Cldn12     | Cirbp    | Acp6     | Dbp      | Arhgap26 | Dci      |
| Adra1d    | Clpx       | Clen3    | Acsf3    | Dcpp3    | Armc2    | Ddo      |
| Adsl      | Cluap1     | Coro6    | Acs16    | Ddah1    | Armet1   | Dennd4b  |
| Agpat3    | Cnksr3     | Cxadr    | Acsm5    | Dip2b    | Art1     | Dhrs4    |
| Aifm1     | Colq       | D2hgdh   | Acss1    | Dmpk     | Art3     | Dhtkd1   |
| Aig1      | Comt1      | Dci      | Acy1     | Dusp16   | As3mt    | Dip2c    |
| Ak1       | Crot       | Ddo      | Acyp2    | Dusp27   | Asb10    | Doc2g    |
| Ak311     | Cry2       | Def8     | Adam11   | Efcab4b  | Asb14    | Ech1     |
| Akap1     | Cutc       | Dennd4b  | Adamts3  | Eif3m    | Asb15    | Echdc2   |
| Akr1b3    | Dach1      | Dhrs4    | Adamts7  | Eml2     | Asb2     | Echdc3   |
| Akt2      | Dbp        | Dhtkd1   | Adck1    | Evi1     | Asb5     | Eepd1    |
| Alad      | Dcp1a      | Dip2c    | Adcy6    | Extl2    | Atg10    | Entpd6   |
| Alas1     | Dcpp3      | Dnmt3a   | Adipor2  | Fam100a  | Atp1a2   | Ephb3    |
| Aldh4a1   | Ddah1      | Doc2g    | Adprhl1  | Fanc1    | Atp8a1   | Ephx2    |
| Aldh5a1   | Dgke       | Dtd1     | Adra1b   | Fgf1     | Atpaf1   | Erc1     |
| Aldh6a1   | Dip2b      | Ech1     | Adsl     | Frag1    | Auh      | Fam65b   |
| Aldob     | Dusp16     | Echdc2   | Aes      | Frm8     | B3galt2  | Fbp2     |
| Alkbh5    | Dusp27     | Echdc3   | Afg311   | Fzd8     | Bbs2     | Fgf16    |
| Alox12    | Efnal      | Eepd1    | Agl      | Gbp3     | Bcat2    | Frem2    |
| Alpk2     | Egr2       | Entpd6   | Agpat3   | Ggct     | Bckdha   | Fyco1    |
| Amacr     | Ehmt1      | Ephb3    | Agtpbp1  | Gpatch8  | Bcl7a    | Gab1     |
| Amd1      | Eif3m      | Ephx2    | Aifm1    | Gramd1b  | Bcl9     | Gcom1    |
| Amtn      | Eif4e      | Erc1     | Ak1      | Grit     | Bhlhb9   | Gdap10   |
| Amz2      | Eml5       | Esrrb    | Akap1    | Gsta4    | Cabc1    | Gene     |
| Anapc13   | Ercc4      | Fam116b  | Akt1s1   | Guk1     | Cacna1s  | Gm889    |
| Ankrd32   | Etv3       | Fam65b   | Akt2     | Gzme     | Calcoco1 | Gmpr     |
| Ankrd52   | Fam178a    | Fbp2     | Alas1    | Hcfc1r1  | Cand2    | Gnb3     |
| Anks1     | Fam69a     | Fbxl22   | Alas2    | Hmgbl    | Capn3    | Hadh     |
| Ano5      | Fap        | Fgf16    | Aldh5a1  | Igsf1    | Casq1    | Herc3    |
| Anxa11    | Fblim1     | Fkbp3    | Aldh9a1  | Il13ra1  | Ccb12    | Hlf      |
| Apbb1     | Fgf1       | Frem2    | Aldob    | Imp2l    | Ccdc21   | Hmcn1    |
| Apex2     | Fnip2      | Frm8     | Alkbh7   | Irf9     | Ccdc69   | Hmgn2    |
| Apip      | Gart       | Fyco1    | Amacr    | Jup      | Cdkl1    | Hrasls   |
| Arfgef2   | Gas5       | Gab1     | Amd1     | Kcnb1    | Cecr2    | Hsd12    |
| Arhgap20  | Gcnt1      | Gcom1    | Amtn     | Kcnf1    | Celsr1   | Idh2     |
| Arhgap26  | Gene       | Gdap10   | Amy1     | Kdm6a    | Celsr2   | Intu     |
| Arhgef10l | Ggct       | Gm428    | Amy2a1   | Kif26b   | Ces3     | Ipo13    |
| Arhgef15  | Gipc2      | Gm826    | Amy2a5   | Lmo2     | Cirbp    | Itga7    |
| Arl2      | Gpd11      | Gm889    | Anapc13  | Lrrc55   | Clen1    | Itgb6    |
| Arl3      | Gpr112     | Gmpr     | Angptl3  | Lrrc61   | Clen3    | Ivd      |
| Armc2     | Gramd1b    | Gnb3     | Ank      | Lysmd4   | Clpb     | Jph1     |
| Armet1    | Grit       | Hadh     | Ank2     | Med4     | Cmb1     | Kcnip2   |
| Art1      | Gtlf3a     | Hcn4     | Ankrd33b | Mef2c    | Coro6    | Kcnj11   |
| As3mt     | Guk1       | Herc3    | Ankrd9   | Meig1    | Cpeb3    | Klhdc1   |
| Asb10     | Gypc       | Hlf      | Anks1    | Meis2    | Cpt2     | Krt222   |
| Asb11     | Haus2      | Hmcn1    | Ap4s1    | Mterfd2  | Crat     | Lama5    |
| Asb14     | Hbegf      | Hmgn2    | Apbb1    | Mtss1    | Cutc     | Lbh      |
| Asb15     | Hes1       | Hrasls   | Apex2    | Myo5b    | Cxadr    | Lclat1   |
| Asb18     | Hist2h2aa1 | Hs3st5   | Apip     | Myo9a    | Cyfip2   | Lgals4   |

|          |          |         |          |            |          |          |
|----------|----------|---------|----------|------------|----------|----------|
| Asb2     | Hmgb2    | Hsd12   | Apoo-ps  | Myom2      | Daam1    | Lgi1     |
| Asrg11   | Hnrnp3   | Idh2    | App12    | N6amt1     | Dbt      | Limch1   |
| Atg10    | Hspb3    | Ift81   | Arfgap2  | Nfe2l3     | Dci      | Lrrc39   |
| Atg2a    | Htr1b    | Insig1  | Arfgef1  | Nmnat3     | Ddo      | Lrrc4b   |
| Atg4d    | Igsf1    | Intu    | Arfrp1   | Npr2       | Decr1    | Lzic     |
| Atp1a2   | Il13ra1  | Ipo13   | Arhgef15 | Nqo1       | Dennd4b  | Mboat2   |
| Atp5e    | Imm2l    | Itga7   | Arhgef9  | Nrap       | Dgat2    | Mccc1    |
| Atp5f1   | Ing5     | Itgb6   | Arl3     | Nudt16l1   | Dhrs4    | Mccc2    |
| Atp5g1   | Ino80    | Ivd     | Arl5b    | Nudt2      | Dhrs7c   | Med12l   |
| Atp5g2   | Irx3     | Jph1    | Asb11    | Nup54      | Dhtkd1   | Mgst3    |
| Atp5k    | Itga9    | Kcnp2   | Asb12    | Otud1      | Dip2c    | Mitf     |
| Atp5l    | Jam3     | Kcnj11  | Asb18    | Pak6       | Dnajc28  | Mlf1     |
| Atp5o    | Jarid2   | Klf9    | Asrg11   | Parp8      | Doc2g    | Mut      |
| Atp5sl   | Kbtbd7   | Klhdc1  | Atg2a    | Per3       | Ech1     | Myh7b    |
| Atp6v1g1 | Kdm6a    | Klra10  | Atg4d    | Pisd       | Echdc2   | Nampt    |
| Atpaf1   | Klf12    | Krt222  | Atl2     | Plekha6    | Echdc3   | Nnt      |
| Auh      | Lmo2     | Ky      | Atp5c1   | Pnet-ps    | Echs1    | Nr3c2    |
| Bag1     | Lonrf1   | Lama5   | Atp5d    | Polr2e     | Eepd1    | Nt5c3    |
| Bag4     | Lsm3     | Larp4   | Atp5e    | Ppm1d      | Egf      | Ogdhl    |
| Bcam     | Lysmd4   | Larp7   | Atp5f1   | Ppm2c      | Eif4e    | Oplah    |
| Bche     | Med4     | Lbh     | Atp5g1   | Ppp1r3b    | Entpd6   | Pah      |
| Bckdhb   | Mef2a    | Lclat1  | Atp5g2   | Prss3      | Epb4.115 | Paqr9    |
| Bcl11a   | Meis2    | Lepr    | Atp5g3   | Psmc1      | Ephb3    | Pccb     |
| Bcl11b   | Mier3    | Lgals4  | Atp5h    | Ptpn4      | Ephx2    | Pctk3    |
| Bcl2l12  | Mov10    | Lgi1    | Atp5j2   | Pygb       | Erb4     | Pde11a   |
| Bcl2l13  | Mrpl52   | Limch1  | Atp5k    | Rad54l2    | Erc1     | Pet112l  |
| Bdh1     | Msto1    | Lrrc39  | Atp5l    | Rad9b      | Etfb     | Pik3c2b  |
| Bend5    | Mthfd1   | Lrrc4b  | Atp5o    | Rassf9     | Fabp3    | Pik3ip1  |
| Bex1     | Mtp      | Lrrc55  | Atp5sl   | Rbbp6      | Fah      | Pkia     |
| Blcap    | Myef2    | Lzic    | Atp6v1g1 | Rbl2       | Fam113b  | Ppif     |
| Bsg      | Myo5b    | Mboat2  | Atpaf2   | Rcor2      | Fam65b   | Ppmlj    |
| Btc      | Myo9a    | Mccc1   | Atpgd1   | Rfwd3      | Fam78a   | Ptpn3    |
| Btnl9    | Myom2    | Mccc2   | Aurkaip1 | Rhobtb2    | Fblim1   | Ptpm     |
| Bzw2     | N6amt1   | Med12l  | Avpr1a   | Rnase9     | Fbp2     | Pts      |
| Cabc1    | Nes      | Mgst3   | Bach2    | Rpp40      | Fbxo21   | Pxmp2    |
| Cacna1s  | Nln      | Mitf    | Bag1     | Runx1t1    | Fbxo3    | Rhd      |
| Cadm4    | Nod1     | Mlf1    | Bag3     | Sema4d     | Fgf13    | Rnf207   |
| Car14    | Nqo1     | Mmd     | Bak1     | Shmt2      | Fgf16    | Scd4     |
| Car8     | Nr3c1    | Mut     | Bcam     | Slc40a1    | Fgf9     | Scgb1c1  |
| Cars2    | Nrap     | Myh7b   | Bcap29   | Slc44a2    | Fkbp4    | Scn4a    |
| Casz1    | Odc1     | Nampt   | Bckdhb   | Slc9a10    | Foxo3    | Sh3rf2   |
| Cav2     | Pde7a    | Necab1  | Bckdk    | Snora34    | Frem2    | Slc25a34 |
| Cbfa2t3  | Pdhh     | Nnt     | Bcl11a   | Sntb1      | Fyco1    | Slc25a38 |
| Cbr4     | Pdr3     | Nr1d2   | Bcl11b   | Sox4       | Gab1     | Slc27a1  |
| Cbwd1    | Per3     | Nr3c2   | Bcl2l11  | Sp4        | Galm     | Slc36a2  |
| Ccbl2    | Plcl2    | Nt5c3   | Bcl2l13  | Spe24      | Gbas     | Symbol   |
| Ccdc12   | Pnet-ps  | Ogdhl   | Bcl6b    | St6galnac3 | Gca      | Synj2    |
| Ccdc44   | Pnmal2   | Oplah   | Bdh1     | Taf7       | Gcdh     | Tef      |
| Ccl11    | Ppm1d    | Pah     | Bend5    | Tanc1      | Gcnt1    | Tmem205  |
| Ccni     | Ppm2c    | Paqr9   | Bex1     | Tecpr1     | Gcom1    | Tmod4    |
| Cenk     | Ppp1r14c | Pccb    | Bloc1s1  | Tet1       | Gdap10   | Trim54   |
| Cdh4     | Prpf4    | Pcdh7   | Bola3    | Tgtp       | Gm129    | Vldlr    |
| Cdk5rap1 | Prpsap2  | Pctk3   | Brp44    | Tjp1       | Gm889    | Xpo4     |
| Cdkl5    | Rapgef5  | Pde11a  | Brp44l   | Tmem196    | Gmpr     | Zswim7   |
| Cecr5    | Rbak     | Pet112l | Bsg      | Trim13     | Gnb3     |          |
| Celsr2   | Rbbp6    | Pex7    | Btnl9    | Tspan13    | Gpd11    |          |
| Cenpv    | Rev1     | Pick1   | Bzw2     | Ttc39b     | Grec10   |          |
| Cep68    | Rfc1     | Pik3c2b | C1qbp    | V1rc25     | Gstk1    |          |
| Chchd2   | Rhobtb2  | Pik3ip1 | Cacna1c  | Vamp5      | Gstz1    |          |
| Chd7     | Rpp40    | Pkia    | Cacna1g  | Wdr36      | H2-Ke2   |          |
| Chpt1    | Rps10    | Plscr2  | Cacnb2   | Wif1       | H2afv    |          |
| Chure1   | Rrm2b    | Ppif    | Cadm4    | Zcche17    | Hadh     |          |
| Ciao1    | Rtf1     | Ppmlj   | Camk2a   | Zfp30      | Hadha    |          |
| Cisd1    | Safb     | Prepl   | Camta1   | Zkscan3    | Hdac4    |          |
| Ckm      | Scaper   | Ptpn3   | Car14    |            | Helz     |          |
| Ckmt2    | Scnm1    | Ptpn4   | Car4     |            | Herc3    |          |
| Clcn1    | Sep2     | Ptpm    | Car8     |            | Hibadh   |          |
| Clpb     | Sema4d   | Pts     | Card6    |            | Hlf      |          |
| Clpp     | Senp7    | Pxmp2   | Cars2    |            | Hmcn1    |          |

|             |          |            |          |  |          |  |
|-------------|----------|------------|----------|--|----------|--|
| Cmtm8       | Sfrs14   | Rasd2      | Casz1    |  | Hmgn2    |  |
| Cobl11      | Sfrs3    | Rcor2      | Cbfa2t3  |  | Hopx     |  |
| Cog6        | Sft2d3   | Rhd        | Cbr4     |  | Hrasls   |  |
| Coq10a      | Sipa112  | Rnf207     | Ceb11    |  | Hrc      |  |
| Coq2        | Six4     | Rrp9       | Ccdc12   |  | Hsd17b10 |  |
| Coq6        | Slc25a28 | Scd4       | Ccdc44   |  | Hsd12    |  |
| Coq7        | Slc25a33 | Scgb1c1    | Ccdc47   |  | Idh2     |  |
| Coq9        | Slc35a4  | Scn4a      | Ccdc90a  |  | Il10rb   |  |
| Cox10       | Slc44a2  | Sh3rf2     | Ccl11    |  | Il15     |  |
| Cox5a       | Smndc1   | Shmt2      | Ccl24    |  | Inpp5e   |  |
| Cox6a2      | Smoc2    | Slc25a34   | Ccnh     |  | Intu     |  |
| Cox6b1      | Snapc1   | Slc25a38   | Ccnk     |  | Ipo13    |  |
| Cox6c       | Snapin   | Slc27a1    | Ccrl2    |  | Iqgap2   |  |
| Cox7a1      | Snord53  | Slc36a2    | Cd1d2    |  | Irx4     |  |
| Cox7b       | Snrpg    | St6galnac3 | Cd36     |  | Itga7    |  |
| Cox7b2      | Sntb1    | Synj2      | Cdc3711  |  | Itgb6    |  |
| Cox7c       | Sp110    | Tef        | Cdc40    |  | Ivd      |  |
| Cox8b       | Sp4      | Tmem205    | Cdh23    |  | Jarid2   |  |
| Cpeb2       | Symbol   | Tmod4      | Cdh4     |  | Jph1     |  |
| Cpeb3       | Synpo21  | Trim54     | Cdk5rap1 |  | Kbtbd3   |  |
| Cpox        | Taf1a    | Ube2o      | Cdk15    |  | Kcnd2    |  |
| Cpt1b       | Tmem50b  | Vldlr      | Cdkn1c   |  | Kcnip2   |  |
| Cpt2        | Tmem87a  | Xpo4       | Cds1     |  | Kcnj11   |  |
| Crat        | Tmem93   | Zfand1     | Cecr5    |  | Kcnv2    |  |
| Creg1       | Tra2b    | Zswim7     | Cenpv    |  | Kctd9    |  |
| Crhr2       | Trdmt1   |            | Cep68    |  | Klhdc1   |  |
| Crygb       | Trib1    |            | Cep70    |  | Klhdc8a  |  |
| Csdc2       | Trim16   |            | Chac2    |  | Klk1b26  |  |
| Csnk2a1-rs2 | Trmt12   |            | Chchd2   |  | Krt222   |  |
| Cth         | Ttc39b   |            | Chchd3   |  | Lama5    |  |
| Ctla4       | Txnip    |            | Chchd7   |  | Lars2    |  |
| Ctnna3      | Txnrd3   |            | Chd7     |  | Lbh      |  |
| Cyc1        | Usp10    |            | Chkb     |  | Lclat1   |  |
| Cyfp2       | Usp21    |            | Chpt1    |  | Ldhd     |  |
| Cyp2b10     | Usp22    |            | Chure1   |  | Lgals4   |  |
| Cyp2b9      | Wdfy1    |            | Ciao1    |  | Lgi1     |  |
| Cyp4b1      | Wdr36    |            | Cidea    |  | Limch1   |  |
| Daam1       | Wdr53    |            | Cisd1    |  | Llgl2    |  |
| Dbt         | Wipi1    |            | Ckm      |  | Lonrf1   |  |
| Dcps        | Xlr      |            | Ckmt2    |  | Lphn2    |  |
| Dcun1d2     | Yeats2   |            | Clpp     |  | Lrrc39   |  |
| Ddt         | Zbtb10   |            | Clpx     |  | Lrrc4b   |  |
| Deb1        | Zfp1     |            | Clyb1    |  | Lrtm1    |  |
| Decr1       | Zfp30    |            | Cmtm8    |  | Lzic     |  |
| Defb34      | Zfp46    |            | Cmya5    |  | M6prbp1  |  |
| Dexi        | Zfp509   |            | Cnga3    |  | Macrodl  |  |
| Dgat2       | Zfp518   |            | Cnksr3   |  | Magi2    |  |
| Dgcr2       | Zfp799   |            | Cnot10   |  | Magix    |  |
| Dguok       | Zfp93    |            | Cobl11   |  | Mboat2   |  |
| Dhrs11      | Zxdc     |            | Cog5     |  | Mccc1    |  |
| Dhrs7c      |          |            | Cog6     |  | Mccc2    |  |
| Dll4        |          |            | Cops6    |  | Me3      |  |
| Dlst        |          |            | Coq10a   |  | Med12l   |  |
| Dnaja3      |          |            | Coq2     |  | Med16    |  |
| Dnajc15     |          |            | Coq3     |  | Mef2a    |  |
| Dnajc28     |          |            | Coq4     |  | Mgmt     |  |
| Dnajc30     |          |            | Coq5     |  | Mgst3    |  |
| Dok4        |          |            | Coq6     |  | Mid1ip1  |  |
| Dot11       |          |            | Coq7     |  | Mitf     |  |
| Dpf3        |          |            | Coq9     |  | Mlf1     |  |
| Dpysl4      |          |            | Cox10    |  | Mlxipl   |  |
| Drap1       |          |            | Cox15    |  | Mrgprh   |  |
| Dsc2        |          |            | Cox4i1   |  | Mrps25   |  |
| Dsg1c       |          |            | Cox5a    |  | Mtap7    |  |
| Dsg2        |          |            | Cox5b    |  | Mut      |  |
| Dtna        |          |            | Cox6a2   |  | Myadml2  |  |
| Dtwd2       |          |            | Cox6b1   |  | Myh7b    |  |
| Dub1        |          |            | Cox6c    |  | Myl3     |  |
| Dusp10      |          |            | Cox7a1   |  | Mylk4    |  |

|          |  |  |             |  |          |  |
|----------|--|--|-------------|--|----------|--|
| Dusp23   |  |  | Cox7a2      |  | Myo18a   |  |
| Dusp7    |  |  | Cox7b       |  | N6amt2   |  |
| Dusp8    |  |  | Cox7c       |  | Nampt    |  |
| Dut      |  |  | Cox8b       |  | Ndufa3   |  |
| Echs1    |  |  | Cpeb2       |  | Neo1     |  |
| Ecsit    |  |  | Cpox        |  | Nfyc     |  |
| Eef1d    |  |  | Cpt1b       |  | Nnt      |  |
| Efna5    |  |  | Creg1       |  | Nr3c2    |  |
| Efnb3    |  |  | Crhr2       |  | Nt5c3    |  |
| Egf      |  |  | Crip2       |  | Oat      |  |
| Ehhadh   |  |  | Cryba4      |  | Ociad2   |  |
| Eif2b4   |  |  | Crybb1      |  | Ogdhl    |  |
| Endog    |  |  | Crygb       |  | Oma1     |  |
| Epha4    |  |  | Cs          |  | Oplah    |  |
| Epm2aip1 |  |  | Csdc2       |  | Osbp2    |  |
| Eral1    |  |  | Csnk2a1-rs2 |  | P2ry1    |  |
| Erb3     |  |  | Ctage5      |  | Pacsin3  |  |
| Erb4     |  |  | Cth         |  | Pah      |  |
| Esrra    |  |  | Ctla4       |  | Pank1    |  |
| Esrrg    |  |  | Ctnna3      |  | Paqr9    |  |
| Etfb     |  |  | Cul5        |  | Pcca     |  |
| Etfdh    |  |  | Cux2        |  | Pccb     |  |
| Ethel    |  |  | Cxcr7       |  | Pctk3    |  |
| Etl4     |  |  | Cxx1b       |  | Pde11a   |  |
| Extl1    |  |  | Cyc1        |  | Pde7a    |  |
| F2rl3    |  |  | Cycs        |  | Pdk2     |  |
| Fabp3    |  |  | Cyp2b10     |  | Pet112l  |  |
| Fah      |  |  | Cyp2b9      |  | Pfkfb1   |  |
| Fam160a1 |  |  | Cyp2u1      |  | Pfkm     |  |
| Fam46b   |  |  | Cyp4b1      |  | Phf7     |  |
| Fam46c   |  |  | Cyth1       |  | Pik3c2b  |  |
| Fam59a   |  |  | Cyyl1       |  | Pik3ip1  |  |
| Fam73a   |  |  | Dap3        |  | Pink1    |  |
| Fam73b   |  |  | Dars2       |  | Pitpnc1  |  |
| Farp2    |  |  | Dbld1       |  | Pkia     |  |
| Fars2    |  |  | Dctpp1      |  | Pla2g4e  |  |
| Fastk    |  |  | Dcun1d2     |  | Plxnb1   |  |
| Fastkd1  |  |  | Ddt         |  | Pm20d1   |  |
| Fbrs     |  |  | Ddx59       |  | Polq     |  |
| Fbxo21   |  |  | Deb1        |  | Ppapdc3  |  |
| Fbxo25   |  |  | Def8        |  | Ppfibp2  |  |
| Fbxo31   |  |  | Dennd2c     |  | Ppif     |  |
| Fdft1    |  |  | Dennd3      |  | Ppm1j    |  |
| Fech     |  |  | Dgcr2       |  | Ppm1k    |  |
| Fgd4     |  |  | Dgcr6       |  | Ppp1r14c |  |
| Fh1      |  |  | Dguok       |  | Prdx5    |  |
| Fhl2     |  |  | Dhodh       |  | Prkcq    |  |
| Fhod3    |  |  | Dhrs11      |  | Prox1    |  |
| Fign     |  |  | Diablo      |  | Ptcd3    |  |
| Fitm1    |  |  | Dixdc1      |  | Ptchd3   |  |
| Fitm2    |  |  | Dkc1        |  | Ptpn3    |  |
| Fkbp4    |  |  | Dlat        |  | Ptprm    |  |
| Fmc1     |  |  | Dld         |  | Pts      |  |
| Fn3k     |  |  | Dll4        |  | Pxmp2    |  |
| Fndc5    |  |  | Dlst        |  | Pxmp4    |  |
| Foxo4    |  |  | Dmxl2       |  | Qsox2    |  |
| Fry      |  |  | Dnaja3      |  | Rbm20    |  |
| Fv1      |  |  | Dnajc15     |  | Retsat   |  |
| Fzr1     |  |  | Dnajc16     |  | Rhd      |  |
| Gal3st3  |  |  | Dnajc19     |  | Ric8b    |  |
| Galm     |  |  | Dnajc30     |  | Rnf207   |  |
| Galnt11  |  |  | Dnalc4      |  | Rnf34    |  |
| Galt     |  |  | Dnmt3a      |  | Rorc     |  |
| Garnl4   |  |  | Dpf3        |  | Rps6ka2  |  |
| Gba2     |  |  | Dpyd        |  | Rrm2b    |  |
| Gbas     |  |  | Dpysl4      |  | Rtn2     |  |
| Gca      |  |  | Drap1       |  | Scd4     |  |
| Gcat     |  |  | Dsc2        |  | Scgb1c1  |  |
| Gcdh     |  |  | Dsg1c       |  | Scn4a    |  |

|          |  |           |          |
|----------|--|-----------|----------|
| Gck      |  | Dsg2      | Sesn1    |
| Gcsh     |  | Dtd1      | Sgol2    |
| Gdpd5    |  | Dtna      | Sh2d4a   |
| Gfm1     |  | Dtnbp1    | Sh3rf2   |
| Gfm2     |  | Dtwd2     | Sipa1l2  |
| Gfra4    |  | Dub1      | Sirt5    |
| Ggnbp1   |  | Dus4l     | Slc20a2  |
| Gjb3     |  | Dusp10    | Slc22a5  |
| Glo1     |  | Dusp23    | Slc25a13 |
| Glud1    |  | Dusp7     | Slc25a20 |
| Gm129    |  | Dusp8     | Slc25a34 |
| Gm216    |  | Dut       | Slc25a38 |
| Gm561    |  | Dynll2    | Slc25a42 |
| Gm949    |  | Dyrk1b    | Slc27a1  |
| Gmfg     |  | Ecsit     | Slc36a2  |
| Gna12    |  | Eef1a2    | Slc41a1  |
| Gnpat    |  | Eef1d     | Slc46a3  |
| Got1     |  | Efcab2    | Slc47a1  |
| Got2     |  | Efemp1    | Slc9a2   |
| Gpbp111  |  | Efna5     | Sobp     |
| Gpc1     |  | Efnb3     | Srpk3    |
| Gpr157   |  | Egln1     | Stom     |
| Gpr22    |  | Egr1      | Suclg2   |
| Gpr84    |  | Ehhadh    | Synj2    |
| Gpt      |  | Eif2b4    | Tcap     |
| Gpt2     |  | Elf2      | Tcea3    |
| Grb14    |  | Elmod3    | Tef      |
| Grcc10   |  | Endog     | Thrsp    |
| Grip2    |  | Eno3      | Tmc7     |
| Grpel1   |  | Entpd4    | Tmem141  |
| Gsdmc2   |  | Epb4.1    | Tmem182  |
| Gsk3a    |  | Epb4.114a | Tmem205  |
| Gstk1    |  | Epha4     | Tmem50b  |
| Gstm7    |  | Epm2aip1  | Tmem82   |
| Gstp1    |  | Epn1      | Tmod4    |
| Gtf3c1   |  | Epn3      | Trim54   |
| Gtpbp10  |  | Eps1511   | Trim63   |
| Gtpbp5   |  | Eral1     | Trpm4    |
| Gzmc     |  | Erbp3     | Tuba4a   |
| Gzmf     |  | Esrra     | Txnrd3   |
| H2-Ke2   |  | Esrrg     | Ulk1     |
| H2-Ke6   |  | Etfp      | Unc45b   |
| H2-T24   |  | Etfhdh    | Usp54    |
| H2afv    |  | Ethel     | Vldlr    |
| Hadha    |  | Etl4      | Wdr42a   |
| Hadhb    |  | Etv3      | Wnk4     |
| Hcn2     |  | Extl1     | Xk       |
| Hdac11   |  | F11r      | Xpo4     |
| Hdac4    |  | Fahd1     | Yipf7    |
| Hdac5    |  | Fahd2a    | Zswim7   |
| Hdac9    |  | Fam116b   |          |
| Hemk1    |  | Fam158a   |          |
| Herpud1  |  | Fam160a1  |          |
| Hfe2     |  | Fam174b   |          |
| Hhatl    |  | Fam46c    |          |
| Higd1a   |  | Fam59a    |          |
| Hint2    |  | Fam73a    |          |
| Hisppd1  |  | Fam73b    |          |
| Hmgcl    |  | Fam82b    |          |
| Hnmt     |  | Farp2     |          |
| Homer2   |  | Fars2     |          |
| Hook1    |  | Fastk     |          |
| Hopx     |  | Fastkd1   |          |
| Hrc      |  | Fastkd2   |          |
| Hsd11b1  |  | Fbxl22    |          |
| Hsd17b10 |  | Fbxo25    |          |
| Hsd17b11 |  | Fbxo31    |          |
| Htra1    |  | Fbxw7     |          |
| Ifngr2   |  | Fdft1     |          |

|           |  |  |         |  |  |
|-----------|--|--|---------|--|--|
| Ifrd2     |  |  | Fdx1    |  |  |
| Igh       |  |  | Fech    |  |  |
| Igk-V21-2 |  |  | Fem1a   |  |  |
| Ikbkap    |  |  | Ferd3l  |  |  |
| Ii10rb    |  |  | Fgd4    |  |  |
| Ii11ra1   |  |  | Fgfr1op |  |  |
| Ii15      |  |  | Fh1     |  |  |
| Ii28b     |  |  | Fhl2    |  |  |
| Impa2     |  |  | Fhod3   |  |  |
| Inadl     |  |  | Fig4    |  |  |
| Inpp5e    |  |  | Figf    |  |  |
| Insr      |  |  | Filip1l |  |  |
| Irx4      |  |  | Fitm1   |  |  |
| Isca1     |  |  | Fitm2   |  |  |
| Isoc1     |  |  | Fkbp3   |  |  |
| Isoc2b    |  |  | Flad1   |  |  |
| Itgb1bp2  |  |  | Fmc1    |  |  |
| Itpkb     |  |  | Fn3k    |  |  |
| Jag2      |  |  | Fndc5   |  |  |
| Jmjd4     |  |  | Fnip1   |  |  |
| Jph2      |  |  | Foxn3   |  |  |
| Kbtbd4    |  |  | Foxo4   |  |  |
| Kcnd3     |  |  | Foxred1 |  |  |
| Kcng2     |  |  | Frap1   |  |  |
| Kcnh2     |  |  | Fry     |  |  |
| Kcnj12    |  |  | Fsd2    |  |  |
| Kcnj3     |  |  | Fstl4   |  |  |
| Kcnj4     |  |  | Fto     |  |  |
| Kcnk3     |  |  | Fv1     |  |  |
| Kcnn2     |  |  | Gabpa   |  |  |
| Kcnv2     |  |  | Gabbr2  |  |  |
| Kdm6b     |  |  | Gal3st3 |  |  |
| Klhdc6    |  |  | Galnt11 |  |  |
| Klhl21    |  |  | Galt    |  |  |
| Klhl23    |  |  | Garnl4  |  |  |
| Klhl3     |  |  | Gata6   |  |  |
| Klhl30    |  |  | Gba2    |  |  |
| Klhl31    |  |  | Gcat    |  |  |
| Klhl34    |  |  | Gck     |  |  |
| Klhl7     |  |  | Gcsh    |  |  |
| Klk1b26   |  |  | Gdpd1   |  |  |
| Klk1b9    |  |  | Gdpd5   |  |  |
| Krba1     |  |  | Gfm1    |  |  |
| L2hgdh    |  |  | Gfm2    |  |  |
| Lace1     |  |  | Gfod1   |  |  |
| Larp2     |  |  | Ggnbp1  |  |  |
| Lars2     |  |  | Ghr     |  |  |
| Lass4     |  |  | Gja3    |  |  |
| Lcmt2     |  |  | Glo1    |  |  |
| Ldb3      |  |  | Glrx5   |  |  |
| Ldhb      |  |  | Gm166   |  |  |
| Ldhd      |  |  | Gm216   |  |  |
| Leng9     |  |  | Gm561   |  |  |
| Llg12     |  |  | Gm826   |  |  |
| Lmf1      |  |  | Gml     |  |  |
| Lmo7      |  |  | Gmnn    |  |  |
| Lmod2     |  |  | Gna12   |  |  |
| Lmod3     |  |  | Gnas    |  |  |
| Lpcat3    |  |  | Gnmt    |  |  |
| Lphn2     |  |  | Gnpat   |  |  |
| Lpin1     |  |  | Got1    |  |  |
| Lpl       |  |  | Got2    |  |  |
| Lrba      |  |  | Gpam    |  |  |
| Lrpprc    |  |  | Gpbp111 |  |  |
| Lrre20    |  |  | Gpc1    |  |  |
| Lrre48    |  |  | Gpn3    |  |  |
| Lrre68    |  |  | Gpr116  |  |  |
| Lrtm1     |  |  | Gpr155  |  |  |
| Lsm14b    |  |  | Gpr157  |  |  |

|          |  |  |           |  |  |
|----------|--|--|-----------|--|--|
| Lsmd1    |  |  | Gpr173    |  |  |
| Lynx1    |  |  | Gpr22     |  |  |
| M6prbp1  |  |  | Gpsn2     |  |  |
| Macrodl  |  |  | Gpt       |  |  |
| Mad211bp |  |  | Gpt2      |  |  |
| Magi3    |  |  | Grb14     |  |  |
| Magix    |  |  | Grip2     |  |  |
| Maob     |  |  | Grm1      |  |  |
| Map3k5   |  |  | Grpel1    |  |  |
| Map4k2   |  |  | Gsk3a     |  |  |
| Mapt     |  |  | Gstm7     |  |  |
| Mars2    |  |  | Gstp1     |  |  |
| Mast2    |  |  | Gtf2i     |  |  |
| Mblac2   |  |  | Gtf3c1    |  |  |
| Mcat     |  |  | Gtpbp10   |  |  |
| Mcee     |  |  | Gtpbp2    |  |  |
| Mcpt1    |  |  | Gtpbp5    |  |  |
| Me3      |  |  | Gys1      |  |  |
| Mepce    |  |  | Gzf1      |  |  |
| Metap1   |  |  | H2-Ke6    |  |  |
| Metap11  |  |  | H2-T24    |  |  |
| Metrn    |  |  | Hadhb     |  |  |
| Mett11b  |  |  | Hand2     |  |  |
| Mfhas1   |  |  | Hars2     |  |  |
| Mfsd7c   |  |  | Hbb-b1    |  |  |
| Mgmt     |  |  | Hccs      |  |  |
| Mif4gd   |  |  | Hcn2      |  |  |
| Mipep    |  |  | Hcn4      |  |  |
| Mllt6    |  |  | Hdac11    |  |  |
| Mlxipl   |  |  | Hdac5     |  |  |
| Mlycd    |  |  | Hdac9     |  |  |
| Mmab     |  |  | Hdhd2     |  |  |
| Mmadhc   |  |  | Hemk1     |  |  |
| Mme      |  |  | Herpud1   |  |  |
| Mmp15    |  |  | Hfe2      |  |  |
| Mospd1   |  |  | Hhat1     |  |  |
| Mpnd     |  |  | Hibch     |  |  |
| Mpped2   |  |  | Hint2     |  |  |
| Mpst     |  |  | Hisppd1   |  |  |
| Mrgprh   |  |  | Hk2       |  |  |
| Mrpl1    |  |  | Hmbs      |  |  |
| Mrpl12   |  |  | Hmgb3     |  |  |
| Mrpl15   |  |  | Hmgcl     |  |  |
| Mrpl23   |  |  | Hnmt      |  |  |
| Mrpl27   |  |  | Homer1    |  |  |
| Mrpl28   |  |  | Homer2    |  |  |
| Mrpl37   |  |  | Hook1     |  |  |
| Mrpl38   |  |  | Hs3st5    |  |  |
| Mrpl41   |  |  | Hsd11b1   |  |  |
| Mrpl45   |  |  | Hsd17b4   |  |  |
| Mrpl46   |  |  | Hspd1     |  |  |
| Mrpl48   |  |  | Htra1     |  |  |
| Mrpl54   |  |  | Hus1      |  |  |
| Mrps12   |  |  | Idh1      |  |  |
| Mrps16   |  |  | Idh3a     |  |  |
| Mrps18a  |  |  | Idh3b     |  |  |
| Mrps24   |  |  | Idh3g     |  |  |
| Mrps25   |  |  | Ifngr2    |  |  |
| Mrps28   |  |  | Ifrd2     |  |  |
| Mrps30   |  |  | Ift81     |  |  |
| Mrps31   |  |  | Igk-V21-2 |  |  |
| Mrps35   |  |  | Il15ra    |  |  |
| Mrps7    |  |  | Immt      |  |  |
| Mrps9    |  |  | Impa2     |  |  |
| Mrrf     |  |  | Inadl     |  |  |
| Mrs2     |  |  | Insr      |  |  |
| Ms4a2    |  |  | Iqsec1    |  |  |
| Mtap7    |  |  | Iqwd1     |  |  |
| Mtap7d1  |  |  | Irx3      |  |  |

|            |  |  |          |  |  |
|------------|--|--|----------|--|--|
| Mtg1       |  |  | Isca1    |  |  |
| Mtif2      |  |  | Iscu     |  |  |
| Mtx1       |  |  | Isoc1    |  |  |
| Mul1       |  |  | Isyna1   |  |  |
| Murc       |  |  | Itgb1bp2 |  |  |
| Myadml2    |  |  | Itpkb    |  |  |
| Mybpc2     |  |  | Itrp2    |  |  |
| Myl2       |  |  | Ivns1abp |  |  |
| Myl3       |  |  | Jag2     |  |  |
| Mylk4      |  |  | Jam2     |  |  |
| Myo10      |  |  | Jhdm1d   |  |  |
| Myo18a     |  |  | Jmjd4    |  |  |
| Myo18b     |  |  | Jmy      |  |  |
| Myo5c      |  |  | Josd1    |  |  |
| Myocd      |  |  | Jph2     |  |  |
| Myog       |  |  | Kbtbd4   |  |  |
| Myot       |  |  | Kcnd3    |  |  |
| N6amt2     |  |  | Kcng2    |  |  |
| Narfl      |  |  | Kcnh2    |  |  |
| Nav2       |  |  | Kcnj12   |  |  |
| Ncapd3     |  |  | Kcnj2    |  |  |
| Nerna00153 |  |  | Kcnj3    |  |  |
| Ndufa11    |  |  | Kcnj5    |  |  |
| Ndufa13    |  |  | Kcnk3    |  |  |
| Ndufa2     |  |  | Kcnn2    |  |  |
| Ndufa4     |  |  | Kcnq1    |  |  |
| Ndufa5     |  |  | Kdm6b    |  |  |
| Ndufa6     |  |  | Khdrbs3  |  |  |
| Ndufa7     |  |  | Khk      |  |  |
| Ndufa8     |  |  | Kif16b   |  |  |
| Ndufab1    |  |  | Kif1b    |  |  |
| Ndufb10    |  |  | Kitl     |  |  |
| Ndufb11    |  |  | Klf15    |  |  |
| Ndufb4     |  |  | Klf9     |  |  |
| Ndufb5     |  |  | Klhdc3   |  |  |
| Ndufb7     |  |  | Klhdc6   |  |  |
| Ndufb8     |  |  | Klh121   |  |  |
| Ndufb9     |  |  | Klh123   |  |  |
| Ndufc2     |  |  | Klh124   |  |  |
| Ndufs3     |  |  | Klh13    |  |  |
| Ndufs4     |  |  | Klh130   |  |  |
| Ndufs7     |  |  | Klh131   |  |  |
| Ndufv1     |  |  | Klh138   |  |  |
| Neo1       |  |  | Klh17    |  |  |
| Neur12     |  |  | Klh19    |  |  |
| Neur14     |  |  | Klk1b9   |  |  |
| Nfs1       |  |  | Klra10   |  |  |
| Nit2       |  |  | Kpna2    |  |  |
| Nme2       |  |  | Kptn     |  |  |
| Nme3       |  |  | Kti12    |  |  |
| Nmnat1     |  |  | Ky       |  |  |
| Nmur1      |  |  | L2hgdh   |  |  |
| Notch1     |  |  | Lace1    |  |  |
| Npc1       |  |  | Lancl3   |  |  |
| Npepl1     |  |  | Larp2    |  |  |
| Nr1d1      |  |  | Larp4    |  |  |
| Nsmaf      |  |  | Lass4    |  |  |
| Nsmce1     |  |  | Lcmt2    |  |  |
| Nt5c1a     |  |  | Ldb3     |  |  |
| Nt5dc2     |  |  | Ldhh     |  |  |
| Nt5dc3     |  |  | Leng1    |  |  |
| Ntf3       |  |  | Lepr     |  |  |
| Nudt15     |  |  | Letm1    |  |  |
| Nudt6      |  |  | Lifr     |  |  |
| Nudt7      |  |  | Lims1    |  |  |
| Nudt8      |  |  | Lin52    |  |  |
| Nutf2      |  |  | Lin9     |  |  |
| Oaz2       |  |  | Lipe     |  |  |
| Obscn      |  |  | Lman2l   |  |  |



|             |  |  |          |  |  |
|-------------|--|--|----------|--|--|
| Obsl1       |  |  | Lmbr1    |  |  |
| Oma1        |  |  | Lmf1     |  |  |
| Optn        |  |  | Lmo7     |  |  |
| Osbp2       |  |  | Lmod3    |  |  |
| Osbpl3      |  |  | Lmtk2    |  |  |
| Osgep       |  |  | Lpcat3   |  |  |
| Osgep11     |  |  | Lpin1    |  |  |
| P2ry1       |  |  | Lpl      |  |  |
| Pacsin3     |  |  | Lrg1     |  |  |
| Palm2-akap2 |  |  | Lrpprc   |  |  |
| Pank1       |  |  | Lrrc20   |  |  |
| Pank4       |  |  | Lrrc68   |  |  |
| Pcca        |  |  | Lsm14b   |  |  |
| Pcnt        |  |  | Ltbp1    |  |  |
| Pcyt2       |  |  | Ly75     |  |  |
| Pde3a       |  |  | Lyrm5    |  |  |
| Pdha1       |  |  | Maf1     |  |  |
| Pdk2        |  |  | Magi3    |  |  |
| Pebp1       |  |  | Maob     |  |  |
| Peci        |  |  | Map11c3a |  |  |
| Peo1        |  |  | Map2k6   |  |  |
| Perp        |  |  | Map3k5   |  |  |
| Pex10       |  |  | Map4k2   |  |  |
| Pex11a      |  |  | Mapt     |  |  |
| Pex16       |  |  | Mars2    |  |  |
| Pex19       |  |  | Mast2    |  |  |
| Pex6        |  |  | Mat2b    |  |  |
| Pfkfb1      |  |  | Mavs     |  |  |
| Pgpep1      |  |  | Mblac2   |  |  |
| Phb         |  |  | Mcat     |  |  |
| Phb2        |  |  | Mcee     |  |  |
| Phf7        |  |  | Mdh1     |  |  |
| Phlpp       |  |  | Mdh2     |  |  |
| Phpt1       |  |  | Mecr     |  |  |
| Pigo        |  |  | Mepce    |  |  |
| Pink1       |  |  | Metap1   |  |  |
| Pitpnc1     |  |  | Metap11  |  |  |
| Pitpnm2     |  |  | Mett11d1 |  |  |
| Pkd2l2      |  |  | Mett11b  |  |  |
| Pla2g16     |  |  | Mfhas1   |  |  |
| Pla2g4e     |  |  | Mfn1     |  |  |
| Plag1       |  |  | Mfsd7c   |  |  |
| Plekhh3     |  |  | Mfsd8    |  |  |
| Plekhm2     |  |  | Mgll     |  |  |
| Plxnb1      |  |  | Mgrn1    |  |  |
| Pm20d1      |  |  | Mif4gd   |  |  |
| Pm20d2      |  |  | Mipep    |  |  |
| Pnpla2      |  |  | Mkks     |  |  |
| Poldip2     |  |  | Mknk2    |  |  |
| Polg        |  |  | Mllt6    |  |  |
| Polq        |  |  | Mlycd    |  |  |
| Polr1a      |  |  | Mmaa     |  |  |
| Polr1b      |  |  | Mmab     |  |  |
| Polr2f      |  |  | Mmachc   |  |  |
| Polrmt      |  |  | Mmadhc   |  |  |
| Ppa2        |  |  | Mme      |  |  |
| Ppapdc3     |  |  | Mmgt1    |  |  |
| Ppara       |  |  | Mmp15    |  |  |
| Ppfibp2     |  |  | Mospd1   |  |  |
| Ppil1       |  |  | Mov10l1  |  |  |
| Ppm1k       |  |  | Mpi      |  |  |
| Ppm1l       |  |  | Mpped2   |  |  |
| Ppp1r3d     |  |  | Mpst     |  |  |
| Ppp5c       |  |  | Mpv17    |  |  |
| Pptc7       |  |  | Mreg     |  |  |
| Prdm11      |  |  | Mrpl1    |  |  |
| Prdm16      |  |  | Mrpl11   |  |  |
| Prdx5       |  |  | Mrpl12   |  |  |
| Prickle3    |  |  | Mrpl14   |  |  |

|          |  |  |         |  |  |
|----------|--|--|---------|--|--|
| Prkab1   |  |  | Mrpl15  |  |  |
| Prkag1   |  |  | Mrpl18  |  |  |
| Prkcq    |  |  | Mrpl19  |  |  |
| Pr17a2   |  |  | Mrpl2   |  |  |
| Pr17b1   |  |  | Mrpl23  |  |  |
| Prlr     |  |  | Mrpl27  |  |  |
| Prodh    |  |  | Mrpl28  |  |  |
| Prox1    |  |  | Mrpl3   |  |  |
| Prpf19   |  |  | Mrpl30  |  |  |
| Prrg1    |  |  | Mrpl35  |  |  |
| Prune    |  |  | Mrpl36  |  |  |
| Psmg1    |  |  | Mrpl37  |  |  |
| Psors1c2 |  |  | Mrpl38  |  |  |
| Ptchd3   |  |  | Mrpl39  |  |  |
| Ptgds    |  |  | Mrpl4   |  |  |
| Ptov1    |  |  | Mrpl41  |  |  |
| Pxmp4    |  |  | Mrpl44  |  |  |
| Pycl     |  |  | Mrpl45  |  |  |
| Qrs1l    |  |  | Mrpl46  |  |  |
| Rab11b   |  |  | Mrpl47  |  |  |
| Rab3a    |  |  | Mrpl48  |  |  |
| Rabac1   |  |  | Mrpl50  |  |  |
| Raf1     |  |  | Mrpl51  |  |  |
| Rai2     |  |  | Mrpl55  |  |  |
| Rangrf   |  |  | Mrpl9   |  |  |
| Rbm20    |  |  | Mrps18a |  |  |
| Rbmx     |  |  | Mrps18c |  |  |
| Rbx1     |  |  | Mrps23  |  |  |
| Rcsd1    |  |  | Mrps24  |  |  |
| Rdm1     |  |  | Mrps27  |  |  |
| Reep5    |  |  | Mrps28  |  |  |
| Retsat   |  |  | Mrps30  |  |  |
| Ric8b    |  |  | Mrps31  |  |  |
| Rilp     |  |  | Mrps33  |  |  |
| Rilpl1   |  |  | Mrps35  |  |  |
| Rmnd1    |  |  | Mrps36  |  |  |
| Rnaseh2a |  |  | Mrps7   |  |  |
| Rnf122   |  |  | Mrps9   |  |  |
| Rnf166   |  |  | Mrrf    |  |  |
| Rnf187   |  |  | Mrs2    |  |  |
| Rnf34    |  |  | Msh2    |  |  |
| Rnu2     |  |  | Msh3    |  |  |
| Romo1    |  |  | Msrb2   |  |  |
| Rpl36    |  |  | Mtap7d1 |  |  |
| Rpl3l    |  |  | Mtch2   |  |  |
| Rps17    |  |  | Mtfr1   |  |  |
| Rps6ka2  |  |  | Mtg1    |  |  |
| Rpusd3   |  |  | Mtif2   |  |  |
| Rpusd4   |  |  | Mtif3   |  |  |
| Rragd    |  |  | Mtl5    |  |  |
| Rreb1    |  |  | Mto1    |  |  |
| Rsad1    |  |  | Mtrf1   |  |  |
| Rtn2     |  |  | Mtrf11  |  |  |
| Rwdd4a   |  |  | Mtus1   |  |  |
| Rxrg     |  |  | Mtx1    |  |  |
| Samm50   |  |  | Mtx2    |  |  |
| Saps2    |  |  | Mul1    |  |  |
| Sar1b    |  |  | Murc    |  |  |
| Sars2    |  |  | Mybpc2  |  |  |
| Sbk1     |  |  | Myh6    |  |  |
| Sbpl     |  |  | Myl2    |  |  |
| Scn4b    |  |  | Myo10   |  |  |
| Scube1   |  |  | Myo18b  |  |  |
| Sdhb     |  |  | Myo5c   |  |  |
| Sdhc     |  |  | Myocd   |  |  |
| Sdhd     |  |  | Myot    |  |  |
| Sec31b   |  |  | Myst1   |  |  |
| Selenbp1 |  |  | N4bp2   |  |  |
| Selenbp2 |  |  | Nap114  |  |  |

|           |  |  |            |  |  |
|-----------|--|--|------------|--|--|
| Sephs2    |  |  | Naprt1     |  |  |
| Serac1    |  |  | Narf1      |  |  |
| Serpina1d |  |  | Nars2      |  |  |
| Sertad1   |  |  | Nav2       |  |  |
| Sertad2   |  |  | Nbn        |  |  |
| Sesn1     |  |  | Ncapd3     |  |  |
| Setd1b    |  |  | Ncrna00153 |  |  |
| Sfrs12ip1 |  |  | Ndufa1     |  |  |
| Sgca      |  |  | Ndufa10    |  |  |
| Sgcg      |  |  | Ndufa12    |  |  |
| Sgo12     |  |  | Ndufa13    |  |  |
| Sh2d4a    |  |  | Ndufa2     |  |  |
| Shank3    |  |  | Ndufa4     |  |  |
| Sil1      |  |  | Ndufa5     |  |  |
| Sirt3     |  |  | Ndufa6     |  |  |
| Sirt5     |  |  | Ndufa7     |  |  |
| Siva1     |  |  | Ndufa8     |  |  |
| Slc12a7   |  |  | Ndufa9     |  |  |
| Slc16a10  |  |  | Ndufab1    |  |  |
| Slc20a2   |  |  | Ndufaf1    |  |  |
| Slc22a23  |  |  | Ndufaf4    |  |  |
| Slc22a3   |  |  | Ndufb10    |  |  |
| Slc22a5   |  |  | Ndufb11    |  |  |
| Slc25a13  |  |  | Ndufb2     |  |  |
| Slc25a15  |  |  | Ndufb4     |  |  |
| Slc25a20  |  |  | Ndufb5     |  |  |
| Slc25a22  |  |  | Ndufb6     |  |  |
| Slc25a26  |  |  | Ndufb7     |  |  |
| Slc25a42  |  |  | Ndufb8     |  |  |
| Slc26a10  |  |  | Ndufb9     |  |  |
| Slc2a12   |  |  | Ndufc1     |  |  |
| Slc2a4    |  |  | Ndufc2     |  |  |
| Slc35e1   |  |  | Ndufs1     |  |  |
| Slc37a4   |  |  | Ndufs2     |  |  |
| Slc41a1   |  |  | Ndufs3     |  |  |
| Slc46a3   |  |  | Ndufs4     |  |  |
| Slc4a3    |  |  | Ndufs5     |  |  |
| Slc9a2    |  |  | Ndufs6     |  |  |
| Slc9a3r2  |  |  | Ndufs7     |  |  |
| Slc9a6    |  |  | Ndufs8     |  |  |
| Smarcd1   |  |  | Ndufv1     |  |  |
| Smcr7     |  |  | Ndufv2     |  |  |
| Smpd2     |  |  | Necab1     |  |  |
| Smyd1     |  |  | Neurl2     |  |  |
| Snord32a  |  |  | Neurl4     |  |  |
| Snx16     |  |  | Nfs1       |  |  |
| Sobp      |  |  | Nhs11      |  |  |
| Sod2      |  |  | Nipal3     |  |  |
| Sord      |  |  | Nit2       |  |  |
| Sox6      |  |  | Nme2       |  |  |
| Spag7     |  |  | Nmnat1     |  |  |
| Spc24     |  |  | Npc1       |  |  |
| Speer4a   |  |  | Npep11     |  |  |
| Speg      |  |  | Nr0b2      |  |  |
| Spg7      |  |  | Nr1d2      |  |  |
| Spnb1     |  |  | Nsmaf      |  |  |
| Spryd4    |  |  | Nsmce1     |  |  |
| Srpk3     |  |  | Nsun4      |  |  |
| St3gal3   |  |  | Nt5c1a     |  |  |
| Stard7    |  |  | Nt5dc2     |  |  |
| Stat5a    |  |  | Nt5dc3     |  |  |
| Stfa1     |  |  | Ntf3       |  |  |
| Stfa211   |  |  | Nudc       |  |  |
| Stom      |  |  | Nudt12     |  |  |
| Sucla2    |  |  | Nudt15     |  |  |
| Suclg1    |  |  | Nudt3      |  |  |
| Suclg2    |  |  | Nudt6      |  |  |
| Sunc1     |  |  | Nudt7      |  |  |
| Supv311   |  |  | Nudt8      |  |  |

|          |  |  |          |  |  |
|----------|--|--|----------|--|--|
| Svip     |  |  | Nutf2    |  |  |
| Syt7     |  |  | Oaz1     |  |  |
| Tacstd2  |  |  | Oaz2     |  |  |
| Taf4b    |  |  | Obscn    |  |  |
| Tarsl2   |  |  | Obsl1    |  |  |
| Tbc1d16  |  |  | Ogdh     |  |  |
| Tbc1d4   |  |  | Olfr1262 |  |  |
| Tbl3     |  |  | Olfr459  |  |  |
| Tbrg4    |  |  | Olfr67   |  |  |
| Tcap     |  |  | Opa1     |  |  |
| Tcea3    |  |  | Optn     |  |  |
| Tcf15    |  |  | Osbp     |  |  |
| Tcp1l12  |  |  | Osbpl3   |  |  |
| Tecpr1   |  |  | Osbpl6   |  |  |
| Tesc     |  |  | Osgep    |  |  |
| Tfam     |  |  | Osgep11  |  |  |
| Tfb1m    |  |  | Oxa11    |  |  |
| Tfdp2    |  |  | Oxct1    |  |  |
| Tfpt     |  |  | Oxnad1   |  |  |
| Tgif2    |  |  | Pank4    |  |  |
| Thap6    |  |  | Parl     |  |  |
| Thoc6    |  |  | Parp1    |  |  |
| Thoc7    |  |  | Pcdh7    |  |  |
| Thra     |  |  | Pcmd2    |  |  |
| Thrsp    |  |  | Pent     |  |  |
| Thtpa    |  |  | Pcp4l1   |  |  |
| Tiaf2    |  |  | Pcyt2    |  |  |
| Tmc7     |  |  | Pded5    |  |  |
| Tmc8     |  |  | Pde3a    |  |  |
| Tmco7    |  |  | Pde4a    |  |  |
| Tmeff1   |  |  | Pde4c    |  |  |
| Tmem109  |  |  | Pdha1    |  |  |
| Tmem117  |  |  | Pdhb     |  |  |
| Tmem120b |  |  | Pdrg1    |  |  |
| Tmem135  |  |  | Pdss2    |  |  |
| Tmem143  |  |  | Pebp1    |  |  |
| Tmem150  |  |  | Peci     |  |  |
| Tmem159  |  |  | Pecr     |  |  |
| Tmem161b |  |  | Penk     |  |  |
| Tmem182  |  |  | Peo1     |  |  |
| Tmem201  |  |  | Perp     |  |  |
| Tmem22   |  |  | Pex10    |  |  |
| Tmem25   |  |  | Pex11a   |  |  |
| Tmem38b  |  |  | Pex16    |  |  |
| Tmem63b  |  |  | Pex19    |  |  |
| Tmem65   |  |  | Pex6     |  |  |
| Tmem66   |  |  | Pex7     |  |  |
| Tmem70   |  |  | Pfkfb2   |  |  |
| Tmem82   |  |  | Pgf      |  |  |
| Tmem86a  |  |  | Pgpep1   |  |  |
| Tnfaip8  |  |  | Phb      |  |  |
| Tnnc1    |  |  | Phb2     |  |  |
| Tnni3    |  |  | Phf2011  |  |  |
| Tnni3k   |  |  | Phlpp    |  |  |
| Tomm401  |  |  | Phospho1 |  |  |
| Tra2a    |  |  | Phpt1    |  |  |
| Trappc21 |  |  | Phtf2    |  |  |
| Trappc5  |  |  | Phyh     |  |  |
| Trdn     |  |  | Phyhd1   |  |  |
| Trim55   |  |  | Pick1    |  |  |
| Trim63   |  |  | Pigo     |  |  |
| Trim7    |  |  | Pigy     |  |  |
| Trim72   |  |  | Pik3r1   |  |  |
| Trmt2b   |  |  | Pim3     |  |  |
| Trmt1    |  |  | Pkd212   |  |  |
| Trpc1    |  |  | Pkdrej   |  |  |
| Trpm4    |  |  | Pkp4     |  |  |
| Try10    |  |  | Pla2g16  |  |  |
| Tsc22d4  |  |  | Pla2g5   |  |  |

|         |  |  |          |  |  |
|---------|--|--|----------|--|--|
| Tsfm    |  |  | Plag1    |  |  |
| Ttc19   |  |  | Plbd1    |  |  |
| Ttc30a2 |  |  | Plekhf1  |  |  |
| Ttc38   |  |  | Plekh3   |  |  |
| Ttn     |  |  | Plekhn2  |  |  |
| Tuba4a  |  |  | Plscr2   |  |  |
| Tuba8   |  |  | Plxna2   |  |  |
| Tufm    |  |  | Pm20d2   |  |  |
| Tusc4   |  |  | Pmpcb    |  |  |
| Twf2    |  |  | Pnkd     |  |  |
| U2af114 |  |  | Pnpla2   |  |  |
| Ubc1    |  |  | Pnpo     |  |  |
| Ube2d1  |  |  | Pnpt1    |  |  |
| Ube3b   |  |  | Poldip2  |  |  |
| Ubxn2a  |  |  | Polg     |  |  |
| Ugt2b38 |  |  | Poln     |  |  |
| Ugt2b5  |  |  | Polr1a   |  |  |
| Ulkl    |  |  | Polr1b   |  |  |
| Unc84b  |  |  | Polr2f   |  |  |
| Uqcr    |  |  | Polrmt   |  |  |
| Uqcrc1  |  |  | Ppa2     |  |  |
| Uqcrfs1 |  |  | Ppara    |  |  |
| Uqcrh   |  |  | Ppcs     |  |  |
| Uros    |  |  | Ppil1    |  |  |
| Ushbp1  |  |  | Ppm1l    |  |  |
| Usp2    |  |  | Ppp1r3a  |  |  |
| Usp20   |  |  | Ppp1r3d  |  |  |
| Usp28   |  |  | Ppp1r9a  |  |  |
| Uxt     |  |  | Ppp5c    |  |  |
| V1rh9   |  |  | Pptc7    |  |  |
| Vamp5   |  |  | Prdm16   |  |  |
| Vdac1   |  |  | Prdx3    |  |  |
| Vegfb   |  |  | Prei4    |  |  |
| Vmn2r33 |  |  | Prepl    |  |  |
| Vmn2r56 |  |  | Prickle1 |  |  |
| Vmn2r74 |  |  | Prickle3 |  |  |
| Vps36   |  |  | Prkaa2   |  |  |
| Wdr18   |  |  | Prkab1   |  |  |
| Wdr21   |  |  | Prkag1   |  |  |
| Wdr23   |  |  | Prkce    |  |  |
| Wdr40b  |  |  | Prlr     |  |  |
| Wdr5    |  |  | Prodh    |  |  |
| Wdr5b   |  |  | Prpf19   |  |  |
| Wfdc6a  |  |  | Prpf4    |  |  |
| Whrn    |  |  | Prps2    |  |  |
| Wnk2    |  |  | Prrg1    |  |  |
| Wnk4    |  |  | Psemb2   |  |  |
| Wscd1   |  |  | Psemb5   |  |  |
| Xk      |  |  | Psemb7   |  |  |
| Ybx2    |  |  | Psme1    |  |  |
| Yipf7   |  |  | Psmg1    |  |  |
| Zadh2   |  |  | Pstpip2  |  |  |
| Zbtb37  |  |  | Ptcd1    |  |  |
| Zc3h7b  |  |  | Ptcd2    |  |  |
| Zfand5  |  |  | Ptdss2   |  |  |
| Zfp354b |  |  | Ptgds    |  |  |
| Zfp422  |  |  | Ptges2   |  |  |
| Zfp612  |  |  | Ptgr2    |  |  |
| Zfp827  |  |  | Ptov1    |  |  |
| Zfyve21 |  |  | Ptp4a3   |  |  |
| Zh2c2   |  |  | Pygm     |  |  |
| Zim1    |  |  | Qdpr     |  |  |
| Zscan20 |  |  | Qrs1l    |  |  |
|         |  |  | Rab11b   |  |  |
|         |  |  | Rab12    |  |  |
|         |  |  | Rab3a    |  |  |
|         |  |  | Rabgta   |  |  |
|         |  |  | Raf1     |  |  |
|         |  |  | Rai2     |  |  |

|  |  |  |          |  |  |  |
|--|--|--|----------|--|--|--|
|  |  |  | Ranbp6   |  |  |  |
|  |  |  | Rangrf   |  |  |  |
|  |  |  | Rapgef2  |  |  |  |
|  |  |  | Rapgef3  |  |  |  |
|  |  |  | Rapgef4  |  |  |  |
|  |  |  | Rapsn    |  |  |  |
|  |  |  | Rasd2    |  |  |  |
|  |  |  | Rasgrp2  |  |  |  |
|  |  |  | Rbbp7    |  |  |  |
|  |  |  | Rbm24    |  |  |  |
|  |  |  | Rbm38    |  |  |  |
|  |  |  | Rdh13    |  |  |  |
|  |  |  | Rdh14    |  |  |  |
|  |  |  | Rdm1     |  |  |  |
|  |  |  | Reep1    |  |  |  |
|  |  |  | Reep5    |  |  |  |
|  |  |  | Rgs7bp   |  |  |  |
|  |  |  | Rhbdd3   |  |  |  |
|  |  |  | Rhbdl3   |  |  |  |
|  |  |  | Rhobtb3  |  |  |  |
|  |  |  | Rhot2    |  |  |  |
|  |  |  | Rilp     |  |  |  |
|  |  |  | Rilpl1   |  |  |  |
|  |  |  | Rit1     |  |  |  |
|  |  |  | Rmnd1    |  |  |  |
|  |  |  | Rmnd5a   |  |  |  |
|  |  |  | Rnaseh2a |  |  |  |
|  |  |  | Rnf114   |  |  |  |
|  |  |  | Rnf122   |  |  |  |
|  |  |  | Rnf123   |  |  |  |
|  |  |  | Rnf128   |  |  |  |
|  |  |  | Rnf166   |  |  |  |
|  |  |  | Rnf187   |  |  |  |
|  |  |  | Rnls     |  |  |  |
|  |  |  | Rnmtl1   |  |  |  |
|  |  |  | Rom1     |  |  |  |
|  |  |  | Romo1    |  |  |  |
|  |  |  | Rpa3     |  |  |  |
|  |  |  | Rpl36    |  |  |  |
|  |  |  | Rpl3l    |  |  |  |
|  |  |  | Rprd1a   |  |  |  |
|  |  |  | Rps17    |  |  |  |
|  |  |  | Rps6ka5  |  |  |  |
|  |  |  | Rpusd3   |  |  |  |
|  |  |  | Rpusd4   |  |  |  |
|  |  |  | Rragd    |  |  |  |
|  |  |  | Rreb1    |  |  |  |
|  |  |  | Rsbnl1   |  |  |  |
|  |  |  | Rtbdn    |  |  |  |
|  |  |  | Rtf1     |  |  |  |
|  |  |  | Rtn4ip1  |  |  |  |
|  |  |  | Rtn4r    |  |  |  |
|  |  |  | Rufy1    |  |  |  |
|  |  |  | Rwdd4a   |  |  |  |
|  |  |  | Rxrg     |  |  |  |
|  |  |  | Ryr2     |  |  |  |
|  |  |  | S100a1   |  |  |  |
|  |  |  | S3-12    |  |  |  |
|  |  |  | Samm50   |  |  |  |
|  |  |  | Saps2    |  |  |  |
|  |  |  | Sar1b    |  |  |  |
|  |  |  | Sars2    |  |  |  |
|  |  |  | Sbk1     |  |  |  |
|  |  |  | Sbk2     |  |  |  |
|  |  |  | Sbpl     |  |  |  |
|  |  |  | Scmh1    |  |  |  |
|  |  |  | Scn10a   |  |  |  |
|  |  |  | Scn4b    |  |  |  |
|  |  |  | Sco1     |  |  |  |

|  |  |  |           |  |  |  |
|--|--|--|-----------|--|--|--|
|  |  |  | Scrn3     |  |  |  |
|  |  |  | Sdha      |  |  |  |
|  |  |  | Sdhb      |  |  |  |
|  |  |  | Sdhc      |  |  |  |
|  |  |  | Sdhd      |  |  |  |
|  |  |  | Sdpr      |  |  |  |
|  |  |  | Sdr39u1   |  |  |  |
|  |  |  | Sec31b    |  |  |  |
|  |  |  | Sec61a2   |  |  |  |
|  |  |  | Selenbp1  |  |  |  |
|  |  |  | Selenbp2  |  |  |  |
|  |  |  | Sema3a    |  |  |  |
|  |  |  | Sema4b    |  |  |  |
|  |  |  | Serac1    |  |  |  |
|  |  |  | Serpina1d |  |  |  |
|  |  |  | Sertad2   |  |  |  |
|  |  |  | Setd1b    |  |  |  |
|  |  |  | Sfrs12ip1 |  |  |  |
|  |  |  | Sfrs14    |  |  |  |
|  |  |  | Sgca      |  |  |  |
|  |  |  | Sgcb      |  |  |  |
|  |  |  | Sgcg      |  |  |  |
|  |  |  | Shank3    |  |  |  |
|  |  |  | Sirt3     |  |  |  |
|  |  |  | Siva1     |  |  |  |
|  |  |  | Six4      |  |  |  |
|  |  |  | Slc12a7   |  |  |  |
|  |  |  | Slc16a10  |  |  |  |
|  |  |  | Slc22a23  |  |  |  |
|  |  |  | Slc22a3   |  |  |  |
|  |  |  | Slc25a11  |  |  |  |
|  |  |  | Slc25a12  |  |  |  |
|  |  |  | Slc25a15  |  |  |  |
|  |  |  | Slc25a19  |  |  |  |
|  |  |  | Slc25a22  |  |  |  |
|  |  |  | Slc25a26  |  |  |  |
|  |  |  | Slc25a3   |  |  |  |
|  |  |  | Slc25a33  |  |  |  |
|  |  |  | Slc25a4   |  |  |  |
|  |  |  | Slc26a10  |  |  |  |
|  |  |  | Slc26a6   |  |  |  |
|  |  |  | Slc2a12   |  |  |  |
|  |  |  | Slc2a4    |  |  |  |
|  |  |  | Slc35e1   |  |  |  |
|  |  |  | Slc35f5   |  |  |  |
|  |  |  | Slc37a4   |  |  |  |
|  |  |  | Slc38a3   |  |  |  |
|  |  |  | Slc38a4   |  |  |  |
|  |  |  | Slc4a3    |  |  |  |
|  |  |  | Slc5a6    |  |  |  |
|  |  |  | Slc9a3r2  |  |  |  |
|  |  |  | Slc9a6    |  |  |  |
|  |  |  | Slco5a1   |  |  |  |
|  |  |  | Smap2     |  |  |  |
|  |  |  | Smarcd1   |  |  |  |
|  |  |  | Smc7      |  |  |  |
|  |  |  | Smpd1     |  |  |  |
|  |  |  | Smpd2     |  |  |  |
|  |  |  | Smyd1     |  |  |  |
|  |  |  | Smyd2     |  |  |  |
|  |  |  | Snrpd3    |  |  |  |
|  |  |  | Snrpn     |  |  |  |
|  |  |  | Snx15     |  |  |  |
|  |  |  | Snx16     |  |  |  |
|  |  |  | Sod1      |  |  |  |
|  |  |  | Sod2      |  |  |  |
|  |  |  | Sord      |  |  |  |
|  |  |  | Sox12     |  |  |  |
|  |  |  | Spag7     |  |  |  |

|  |  |  |            |  |  |  |
|--|--|--|------------|--|--|--|
|  |  |  | Spg7       |  |  |  |
|  |  |  | Spna1      |  |  |  |
|  |  |  | Spnb1      |  |  |  |
|  |  |  | Spryd4     |  |  |  |
|  |  |  | Srfbp1     |  |  |  |
|  |  |  | Srl        |  |  |  |
|  |  |  | Sssca1     |  |  |  |
|  |  |  | St3gal3    |  |  |  |
|  |  |  | St6galnac6 |  |  |  |
|  |  |  | Stard3     |  |  |  |
|  |  |  | Stard7     |  |  |  |
|  |  |  | Stard8     |  |  |  |
|  |  |  | Stat5a     |  |  |  |
|  |  |  | Stat5b     |  |  |  |
|  |  |  | Stfa1      |  |  |  |
|  |  |  | Stradb     |  |  |  |
|  |  |  | Sucla2     |  |  |  |
|  |  |  | Suclg1     |  |  |  |
|  |  |  | Sunc1      |  |  |  |
|  |  |  | Suox       |  |  |  |
|  |  |  | Supv311    |  |  |  |
|  |  |  | Svip       |  |  |  |
|  |  |  | Syde2      |  |  |  |
|  |  |  | Syp12      |  |  |  |
|  |  |  | Syt7       |  |  |  |
|  |  |  | Tacc2      |  |  |  |
|  |  |  | Taf4a      |  |  |  |
|  |  |  | Taf6       |  |  |  |
|  |  |  | Tarbp2     |  |  |  |
|  |  |  | Tars2      |  |  |  |
|  |  |  | Tars12     |  |  |  |
|  |  |  | Tbc1d16    |  |  |  |
|  |  |  | Tbc1d24    |  |  |  |
|  |  |  | Tbc1d4     |  |  |  |
|  |  |  | Tbrg4      |  |  |  |
|  |  |  | Tcf15      |  |  |  |
|  |  |  | Tcp1112    |  |  |  |
|  |  |  | Tesc       |  |  |  |
|  |  |  | Tfam       |  |  |  |
|  |  |  | Tfb1m      |  |  |  |
|  |  |  | Tfb2m      |  |  |  |
|  |  |  | Tfdp2      |  |  |  |
|  |  |  | Tfpt       |  |  |  |
|  |  |  | Tgfr3      |  |  |  |
|  |  |  | Thap4      |  |  |  |
|  |  |  | Thap6      |  |  |  |
|  |  |  | Thrb       |  |  |  |
|  |  |  | Tiaf2      |  |  |  |
|  |  |  | Timm23     |  |  |  |
|  |  |  | Timm44     |  |  |  |
|  |  |  | Timm8b     |  |  |  |
|  |  |  | Timp4      |  |  |  |
|  |  |  | Tmc8       |  |  |  |
|  |  |  | Tmcc1      |  |  |  |
|  |  |  | Tmed4      |  |  |  |
|  |  |  | Tmeff1     |  |  |  |
|  |  |  | Tmem106b   |  |  |  |
|  |  |  | Tmem116    |  |  |  |
|  |  |  | Tmem117    |  |  |  |
|  |  |  | Tmem120b   |  |  |  |
|  |  |  | Tmem135    |  |  |  |
|  |  |  | Tmem143    |  |  |  |
|  |  |  | Tmem147    |  |  |  |
|  |  |  | Tmem150    |  |  |  |
|  |  |  | Tmem159    |  |  |  |
|  |  |  | Tmem160    |  |  |  |
|  |  |  | Tmem161a   |  |  |  |
|  |  |  | Tmem170    |  |  |  |
|  |  |  | Tmem170b   |  |  |  |



|  |  |  |          |  |  |
|--|--|--|----------|--|--|
|  |  |  | Tmem201  |  |  |
|  |  |  | Tmem22   |  |  |
|  |  |  | Tmem223  |  |  |
|  |  |  | Tmem25   |  |  |
|  |  |  | Tmem38b  |  |  |
|  |  |  | Tmem63b  |  |  |
|  |  |  | Tmem65   |  |  |
|  |  |  | Tmem66   |  |  |
|  |  |  | Tmem86a  |  |  |
|  |  |  | Tnfaip8  |  |  |
|  |  |  | Tnip3    |  |  |
|  |  |  | Tnnc1    |  |  |
|  |  |  | Tnni3    |  |  |
|  |  |  | Tnni3k   |  |  |
|  |  |  | Tnnt2    |  |  |
|  |  |  | Tomm40l  |  |  |
|  |  |  | Tomm7    |  |  |
|  |  |  | Top1mt   |  |  |
|  |  |  | Trap1    |  |  |
|  |  |  | Trappc21 |  |  |
|  |  |  | Trappc5  |  |  |
|  |  |  | Trdn     |  |  |
|  |  |  | Trim55   |  |  |
|  |  |  | Trim7    |  |  |
|  |  |  | Trim72   |  |  |
|  |  |  | Trip10   |  |  |
|  |  |  | Trmt2b   |  |  |
|  |  |  | Trmt5    |  |  |
|  |  |  | Try10    |  |  |
|  |  |  | Tsfm     |  |  |
|  |  |  | Ttc19    |  |  |
|  |  |  | Ttc21b   |  |  |
|  |  |  | Ttc30a2  |  |  |
|  |  |  | Ttc30b   |  |  |
|  |  |  | Ttc32    |  |  |
|  |  |  | Ttc38    |  |  |
|  |  |  | Ttn      |  |  |
|  |  |  | Tuba8    |  |  |
|  |  |  | Tufm     |  |  |
|  |  |  | Tusc4    |  |  |
|  |  |  | Twf2     |  |  |
|  |  |  | Txlnb    |  |  |
|  |  |  | Txnrd2   |  |  |
|  |  |  | Tysnd1   |  |  |
|  |  |  | U2af114  |  |  |
|  |  |  | Ubac1    |  |  |
|  |  |  | Ube2b    |  |  |
|  |  |  | Ube2d1   |  |  |
|  |  |  | Ube2e3   |  |  |
|  |  |  | Ube2o    |  |  |
|  |  |  | Ube3b    |  |  |
|  |  |  | Ubl3     |  |  |
|  |  |  | Ubl7     |  |  |
|  |  |  | Ubr2     |  |  |
|  |  |  | Ubr3     |  |  |
|  |  |  | Ubxn2a   |  |  |
|  |  |  | Ucp3     |  |  |
|  |  |  | Unc84b   |  |  |
|  |  |  | Ung      |  |  |
|  |  |  | Uqcc     |  |  |
|  |  |  | Uqcr     |  |  |
|  |  |  | Uqcrb    |  |  |
|  |  |  | Uqcrc1   |  |  |
|  |  |  | Uqcrc2   |  |  |
|  |  |  | Uqcrfs1  |  |  |
|  |  |  | Uqcrh    |  |  |
|  |  |  | Uqcrq    |  |  |
|  |  |  | Uros     |  |  |
|  |  |  | Ushbp1   |  |  |

|  |  |  |          |  |  |  |
|--|--|--|----------|--|--|--|
|  |  |  | Usmg5    |  |  |  |
|  |  |  | Usp2     |  |  |  |
|  |  |  | Usp28    |  |  |  |
|  |  |  | Uxt      |  |  |  |
|  |  |  | Vdac1    |  |  |  |
|  |  |  | Vdac3    |  |  |  |
|  |  |  | Vegfa    |  |  |  |
|  |  |  | Vegfb    |  |  |  |
|  |  |  | Vmn2r120 |  |  |  |
|  |  |  | Vwa3a    |  |  |  |
|  |  |  | Wbscr16  |  |  |  |
|  |  |  | Wdr18    |  |  |  |
|  |  |  | Wdr21    |  |  |  |
|  |  |  | Wdr23    |  |  |  |
|  |  |  | Wdr40b   |  |  |  |
|  |  |  | Wdr5     |  |  |  |
|  |  |  | Wdte1    |  |  |  |
|  |  |  | Wfdc1    |  |  |  |
|  |  |  | Wfdc6a   |  |  |  |
|  |  |  | Whrn     |  |  |  |
|  |  |  | Wnk2     |  |  |  |
|  |  |  | Wnt5a    |  |  |  |
|  |  |  | Wmip1    |  |  |  |
|  |  |  | Yars2    |  |  |  |
|  |  |  | Ybx2     |  |  |  |
|  |  |  | Yipf4    |  |  |  |
|  |  |  | Zadh2    |  |  |  |
|  |  |  | Zc3h7b   |  |  |  |
|  |  |  | Zdhhc7   |  |  |  |
|  |  |  | Zfand1   |  |  |  |
|  |  |  | Zfand5   |  |  |  |
|  |  |  | Zfp191   |  |  |  |
|  |  |  | Zfp358   |  |  |  |
|  |  |  | Zfp422   |  |  |  |
|  |  |  | Zfp606   |  |  |  |
|  |  |  | Zfp612   |  |  |  |
|  |  |  | Zfp715   |  |  |  |
|  |  |  | Zfp759   |  |  |  |
|  |  |  | Zfp771   |  |  |  |
|  |  |  | Zfyve21  |  |  |  |
|  |  |  | Zh2c2    |  |  |  |
|  |  |  | Zhx2     |  |  |  |
|  |  |  | Zim1     |  |  |  |
|  |  |  | Zmynd8   |  |  |  |
|  |  |  | Zscan20  |  |  |  |
|  |  |  | Zyg11b   |  |  |  |
|  |  |  | rp9      |  |  |  |

| Up-regulated ARG X GLY comparison              |                                                |                                                |                                                |                                                |                                 |                                                              |
|------------------------------------------------|------------------------------------------------|------------------------------------------------|------------------------------------------------|------------------------------------------------|---------------------------------|--------------------------------------------------------------|
| Uniquely Regulated ARG 3 months X GLY 3 months | Uniquely Regulated GLY 3 months X ARG 3 months | Commonly Regulated ARG 3 months X GLY 3 months | Uniquely Regulated ARG 6 months X GLY 6 months | Uniquely Regulated GLY 6 months X ARG 6 months | Commonly Regulate ARG 6 X GLY 6 | Commonly Regulated (Uniquely Regulated ARG 3 X GLY3) X GLY 6 |
| Aars                                           | Aass                                           | Acp5                                           | Aacs                                           | Abcb1b                                         | A4galt                          | Abhd2                                                        |
| Abhd2                                          | Abca1                                          | Acta2                                          | Abi2                                           | Adam15                                         | Abca1                           | Adams2                                                       |
| Abra                                           | Ablim2                                         | Adrbk2                                         | Acap2                                          | Adora2b                                        | Abca8a                          | Akap2                                                        |
| Acox2                                          | Acer2                                          | Amy1                                           | Acbd3                                          | Adrbk2                                         | Abca9                           | Alcam                                                        |
| Adams2                                         | Adams12                                        | Ang                                            | Acot9                                          | Ap1s2                                          | Abcc3                           | Aldh18a1                                                     |
| Adams4                                         | Adrb2                                          | Anxa1                                          | Actb                                           | Aqp4                                           | Abhd2                           | Aldh1a2                                                      |
| Adams9                                         | Aldh1b1                                        | Apoe                                           | Actg1                                          | Arhgef12                                       | Abi1                            | Ammecr1                                                      |
| Adap2                                          | Alpk2                                          | Aqp4                                           | Actr3                                          | Arrdc4                                         | Abi3bp                          | Anxa2                                                        |
| Agap1                                          | Amy2a1                                         | Armxc3                                         | Acvr1                                          | Atf4                                           | Acaca                           | Anxa4                                                        |
| Akap2                                          | Amy2a5                                         | Arntl                                          | Acvr1l                                         | Atp6v0b                                        | Ace                             | Apobec1                                                      |

|          |          |           |          |         |          |         |
|----------|----------|-----------|----------|---------|----------|---------|
| Alcam    | Angptl1  | Aspn      | Adam10   | Cacna1a | Acp2     | Apod    |
| Aldh18a1 | Ap3s1    | Atg4a     | Adam19   | Cblb    | Acp5     | Armet   |
| Aldh1a2  | Arl11    | Atp10a    | Adamts12 | Ccl19   | Acs14    | Arpc1b  |
| Alg10b   | Arsa     | Atrn11    | Adar     | Cd163   | Acs15    | Arpc3   |
| Alg8     | B3gnt1   | Bmp2      | Adecy3   | Cd209a  | Acta2    | Arrb1   |
| Amigo2   | Bhlhe40  | C1qb      | Adss     | Cd74    | Actn1    | Atf4    |
| Ammecr1  | C1r      | C1s       | Adssl1   | Cdh22   | Actn4    | Axl     |
| Anxa2    | C6       | C3        | Agap1    | Cdo1    | Adam8    | B4galt5 |
| Anxa4    | Cbr2     | C4b       | Aida     | Cenpf   | Adam9    | C1qa    |
| Ap1g2    | Ccrn4l   | C7        | Aif1     | Cflar   | Adamts10 | C1qtnf6 |
| Apobec1  | Cd300lb  | Ccl6      | Akt3     | Chd3    | Adamts2  | C4a     |
| Apod     | Cdkn2c   | Ccl9      | Aldh1a7  | Csprs   | Adamts20 | C5ar1   |
| Arhgdig  | Cep192   | Ccnd3     | Aldh3b1  | Ctnnal1 | Adamts5  | Cab39l  |
| Armet    | Cml1     | Cd109     | Alg14    | Cxcl14  | Adamts12 | Camkk2  |
| Arpc1b   | Corin    | Cd24a     | Anln     | Cyb5    | Adamts13 | Capg    |
| Arpc3    | Csf2ra   | Cd53      | Anp32b   | Cyp3a44 | Adecy7   | Car13   |
| Arpc4    | Cuzd1    | Cdh22     | Anxa7    | Dennd1c | Aebp1    | Ccdc80  |
| Arrb1    | Cxcl1    | Cdkn1a    | Apc      | Dnaja1  | Aff2     | Ccdc88a |
| Atf4     | Cyb5r4   | Cdo1      | Apobec3  | Dpep1   | Aff3     | Cd44    |
| Atf5     | Cyp2d10  | Cdv3      | App11    | Dpm2    | Agfg2    | Cd47    |
| Atp8b4   | Defa5    | Cenpf     | Ar       | Dpp6    | Ahnak2   | Cd48    |
| Axl      | Dpp6     | Cfl1      | Arhgap22 | Dusp5   | Ahsg     | Cd55    |
| Azin1    | Dppa5a   | Col3a1    | Arhgdia  | Ebp     | Akap13   | Cd68    |
| B4galt5  | Dsg1b    | Creld2    | Arhgdib  | Emilin2 | Akap2    | Cd84    |
| B4galt7  | Dusp5    | Csf1r     | Arhgdig  | Faf2    | Akna     | Cebpg   |
| Basp1    | Ear6     | Ctnnal1   | Arhgef5  | Filip11 | Akr1b8   | Clcn5   |
| Bcat1    | Ecm1     | Ctss      | Arih1    | Flnb    | Alcam    | Clec4d  |
| Bcl3     | Egn3     | Det       | Arl5a    | Gnb4    | Aldh18a1 | Cmklr1  |
| Bloc1s3  | Elk1     | Disp1     | Arpc4    | Gpbar1  | Aldh1a1  | Col14a1 |
| Bves     | Ephx3    | Dkk11     | Arsa     | Grina   | Aldh1a2  | Col16a1 |
| C1qa     | Eppk1    | Dock8     | Asah2    | H2-Ab1  | Alox5ap  | Col1a1  |
| C1qtnf6  | Erich1   | Emr1      | Ascc3    | H2-D1   | Alpk1    | Col1a2  |
| C4a      | Ero11b   | Fam122b   | Aspser1  | H2-DMa  | Ammecr1  | Col4a2  |
| C5ar1    | F8       | Fam178b   | Atad2    | Hal     | Ang      | Col5a1  |
| Cab39l   | Fam102b  | Fam46a    | Atg7     | Hcn1    | Angptl7  | Col6a2  |
| Camkk1   | Fam124a  | Fcgr2b    | Ath11    | Heatr7a | Ankfy1   | Col6a3  |
| Camkk2   | Fam168a  | Fgl2      | Atoh1    | Herc5   | Ankrd1   | Cpne8   |
| Cand1    | Fam50b   | Fhl1      | Atp13a3  | Hmcn2   | Ankrd13a | Ctsh    |
| Capg     | Fbxo8    | Fstl4     | Atp6v0d2 | Hnrnph2 | Ankrd27  | Cxcl16  |
| Car13    | Fgf11    | Galns     | Atxn10   | Hp      | Ano6     | Cyb561  |
| Car2     | Ftl1     | Galnt2    | Atxn21   | Hspa8   | Anpep    | Cyb5r3  |
| Cars     | Ftl2     | Gatsl2    | Azin1    | Hsph1   | Antxr1   | Cybb    |
| Cask     | Furin    | Gda       | B3galnt1 | Htr2b   | Anxa1    | Cyp1b1  |
| Ccdc80   | Gabrg3   | Gfpt2     | B4galt6  | Iars    | Anxa2    | Cyth4   |
| Ccdc88a  | Gas1     | Gnpnat1   | Basp1    | Ifi47   | Anxa3    | Dab2    |
| Ccr2     | Gm2a     | Golga4    | Bcat1    | Ifit1   | Anxa4    | Dap     |
| Ccrl1    | Gm628    | Gpr133    | Bcl2     | Ifitm1  | Anxa5    | Dbn1    |
| Cd44     | Gpx2     | Gpr158    | Bdh2     | Il7r    | Anxa8    | Ddr2    |
| Cd47     | H2-Ea    | Gpr65     | Bend4    | Irf7    | Aoah     | Dennd4a |
| Cd48     | H2-Eb1   | Gpx1      | Bend6    | Itga2   | Aoc3     | Derl3   |
| Cd55     | H2-T10   | Gpx3      | Best3    | Klf10   | Ap2b1    | Dock2   |
| Cd68     | Hcn1     | Gpx8      | Bhlhe40  | Kmo     | Ap3b1    | Dok5    |
| Cd84     | Hfe      | Grin2c    | Bin1     | Lrrc33  | Ap3s1    | Dzip3   |
| Cdca7    | Hist1h1c | Grk5      | Bmp4     | Lsm14a  | Apaf1    | Edem1   |
| Cebpg    | Hlx      | Hal       | Bmp6     | Ly6c1   | Apba1    | Efemp2  |
| Cenpl    | Hpse     | Hand2     | Bmx      | Mafb    | Apbb1ip  | Eln     |
| Cenpt    | Hras1    | Hexb      | Bre      | Mmp16   | Apedd1   | Elov11  |
| Cercam   | Ifi2711  | Hhip11    | Brsk1    | Mustn1  | Aph1b    | Entpd1  |
| Ch25h    | Ifnb1    | Hist1h2ao | Bzw1     | Nat13   | Apobec1  | Entpd2  |
| Chpf     | Il10ra   | Hist1h2bc | C1qtnf2  | Ncf4    | Apod     | Eps8    |
| Cleal    | Inmt     | Hist1h3d  | C1qtnf7  | Ndst2   | Apoe     | Fads1   |
| Clcn5    | Irak3    | Hsp90aa1  | Cacnb1   | Nhlrc3  | App      | Fam105a |
| Clec12a  | Itfg3    | Iah1      | Cacnb3   | Nlrc4   | Arap1    | Fbln1   |
| Clec3b   | Klk1b11  | Ifi205    | Cadps    | Nono    | Arf3     | Fbln2   |
| Clec4d   | Lgals3bp | Il6ra     | Calcr1   | Nptn    | Arf4     | Fbn1    |
| Clec5a   | Lman11   | Inhbb     | Cald1    | Nr4a3   | Arf6     | Fcer1g  |
| Cmklr1   | Lpar3    | Itga11    | Calhm2   | Nxf1    | Arfgap3  | Fcgr1   |
| Col14a1  | Lpcat2   | Itgb2     | Calu     | Obfc2a  | Arfip1   | Filip11 |
| Col16a1  | Lrp2bp   | Krt80     | Camkk1   | Pde9a   | Arhgap1  | Fn1     |

|         |           |           |            |           |           |            |
|---------|-----------|-----------|------------|-----------|-----------|------------|
| Col1a1  | Ly6a      | Lad1      | Camsap111  | Pgk1      | Arhgap11a | Fstl1      |
| Col1a2  | Mab2112   | Lilrb3    | Camta1     | Pion      | Arhgap25  | Fyb        |
| Col4a1  | Mafb      | Lipa      | Cand1      | Pira3     | Arhgap30  | Gadd45g    |
| Col4a2  | Map11c3a  | Lrrc52    | Casc4      | Pitpna    | Arhgef2   | Galc       |
| Col5a1  | Mapk10    | Lyz1      | Cask       | Pla2g2d   | Arid5b    | Gars       |
| Col6a2  | Mapkapk2  | Lyz2      | Cbara1     | Pnp1      | Arl13b    | Gatm       |
| Col6a3  | Mea1      | Maged2    | Cbl        | Pnp2      | Arl4c     | Gcnt2      |
| Cops3   | Mgat1     | Man1a     | Cbx5       | Pole2     | Arl8a     | Gmfg       |
| Cpne8   | Mif       | Mapk4     | Ccdc34     | Prpmp5    | Armex2    | Golim4     |
| Cst9    | Mrpl19    | Max       | Ccdc41     | Ptges3    | Armex3    | Gp49a      |
| Ctsh    | Mrpl20    | Mctp1     | Ccdc50     | Ptgfr     | Armet     | Gpm6b      |
| Ctsl    | Mstn      | Mfap5     | Ccnb1      | Ptprz1    | Arpc1b    | Gpnm       |
| Cx3cr1  | Naaa      | Mmp12     | Ccnb2      | Rasgrp4   | Arpc3     | Gpr137b-ps |
| Cxcl16  | Ndrg4     | Mpeg1     | Ccnc       | Rexo4     | Arrb1     | Gprc5b     |
| Cyb561  | Neil2     | Mrc1      | Ccnd1      | Ripk1     | Arrb2     | Grn        |
| Cyb5r3  | Nfil3     | Ms4a6c    | Ccnd2      | Rpgrip11  | Arsb      | Gsta1      |
| Cybb    | Ninj1     | Mt1       | Ccny11     | Rps6ka1   | Asah1     | Gsta2      |
| Cyp1b1  | Nle1      | Mt2       | Ccrl1      | Rxfp1     | Asl       | Hck        |
| Cyth4   | Osr1      | Myh7      | Cd200      | Samhd1    | Asns      | Hcls1      |
| Dab2    | Pcgf5     | N4bp211   | Cd276      | Sec31a    | Aspn      | Hmcn2      |
| Dagla   | Pctp      | Napepld   | Cd52       | Sele      | Ass1      | Hmox1      |
| Dap     | Pde1c     | Ncf4      | Cd82       | Sema4a    | At13      | Hsp90b1    |
| Dbn1    | Pde3a     | Nr2f6     | Cde16      | Serpina3c | Atp10a    | Hsph1      |
| Ddr2    | Pgam1     | Nubp1     | Cdc20      | Serpina3f | Atp1b3    | Ifi30      |
| Dennd4a | Phkg1     | Nudt4     | Cdc25b     | Serpib9   | Atp2b4    | Ifitm2     |
| Derl3   | Phlda3    | Nup62     | Cdc27      | Sh3gl2    | Atp6ap2   | Ifngr1     |
| Diap3   | Pigq      | Nupr1     | Cdk6       | Slc25a5   | Atp6v0a4  | Igf1       |
| Dock2   | Pipox     | Olfml2b   | Cdkn2c     | Slco2b1   | Atp6v1a   | Igf2bp2    |
| Dok5    | Pla2g5    | Osmr      | Cdr2l      | Sncg      | Atp6v1h   | Igfbp6     |
| Dph5    | Ppcs      | P2ry6     | Cdv3       | Snx8      | Atp7a     | Igsf6      |
| Dtx4    | Ppp2r5b   | Pacrg     | Cenpo      | Ssr2      | Atp8b1    | Il17ra     |
| Dyrk2   | Pramel5   | Pam       | Cenpt      | Stat3     | Atp8b2    | Il1r1      |
| Dzip3   | Prex1     | Pde3b     | Cep164     | Stk17b    | Atrn1     | Il4ra      |
| Edem1   | Prps2     | Pdzd2     | Cercam     | Stk38     | Axl       | Inpp5d     |
| Eef1e1  | Ptp4a3    | Pfkl      | Cerkl      | Stxbp4    | B2m       | Ints3      |
| Efemp2  | Ras110a   | Pgrmc1    | Ces2       | Supt16h   | B4galnt1  | Iqgap1     |
| Efs     | Rdh7      | Phka1     | Cfl1       | Tbc1d9    | B4galnt5  | Kcnn3      |
| Eid1    | Rfx2      | Pira2     | Chad       | Tlr3      | Bace2     | Lamc1      |
| Elfn1   | Rgma      | Plcb4     | Chd9       | Tnfsf13b  | Baiap2    | Laptm5     |
| Eln     | Rgnef     | Pnp2      | Chn2       | Tnip2     | Baz1a     | Lbp        |
| Elov11  | Rgs6      | Ppp1r14b  | Chpf       | Tpp1      | Bcr       | Lcp1       |
| Enkur   | Rilpl2    | Prss23    | Chst14     | Trim21    | Bgn       | Ldlr       |
| Entpd1  | Rnu7      | Ptprd     | Chsy1      | Ttc26     | Bicc1     | Leprel1    |
| Entpd2  | Rpp25     | Ptprj     | Cks1b      | Ttl3      | Bin3      | Lgals3     |
| Eps8    | Rps4y2    | Rab3ip    | Clec12a    | Txnip     | Birc3     | Lox        |
| Fads1   | Sap30     | Rabgap11  | Clec3b     | Ugp2      | Bmp1      | Lox11      |
| Fam105a | Sbpl      | Rad5111   | Cltb       | Zdhhc23   | Bmp2      | Lox12      |
| Fam117b | Sec11c    | Rgs2      | Cltc       |           | Bmp2k     | Lox14      |
| Fbln1   | Serpina3c | Rock2     | Cmtm3      |           | Bmper     | Lpp        |
| Fbln2   | Serping1  | Rp1       | Cnn2       |           | Bnc2      | Lsm6       |
| Fbn1    | Sh3bgr12  | Rtn4      | Cnrip1     |           | Boc       | Ly86       |
| Fcer1g  | Shroom3   | S1pr1     | Cntln      |           | C1qa      | Man2a1     |
| Fcf1    | Siah2     | Serpina3h | Col4a1     |           | C1qb      | Matn2      |
| Fcgr1   | Sid2      | Serpina3n | Col5a3     |           | C1qc      | Mertk      |
| Fgd2    | Slc17a7   | Serpine2  | Comm4      |           | C1qtnf6   | Mfsd1      |
| Fgf18   | Slc35f1   | Sh3d19    | Comm4      |           | C1r       | Mmp14      |
| Fgfr3   | Slc37a2   | Sh3gl2    | Copb1      |           | C1s       | Mmp19      |
| Filip11 | Slc4a4    | Slc10a6   | Copg       |           | C3        | Mmrn1      |
| Fkbp5   | Slc9a9    | Slc16a7   | Coro1c     |           | C3ar1     | Ms4a6b     |
| Fnl     | Slco2b1   | Slc25a5   | Coro7      |           | C4a       | Ms4a7      |
| Fstl1   | Slit3     | Slc35e4   | Creb5      |           | C4b       | Msn        |
| Fuz     | Snrpn     | Slc38a3   | Crip1      |           | C5ar1     | Mtap1b     |
| Fyb     | Socs7     | Slitrk4   | Csf1       |           | C6        | Mtmr11     |
| Gadd45g | Sstr4     | St3gal5   | Csgalnact2 |           | C7        | Myo1f      |
| Galc    | Suox      | Stk39     | Csk        |           | Cab39l    | Myo7a      |
| Gars    | Tbx5      | Stxbp2    | Csnk1g3    |           | Cachd1    | Myof       |
| Gatm    | Tmem22    | Sulf2     | Cspg4      |           | Cadm3     | Nckap11    |
| Gcnt2   | Tmem35    | Syt12     | Cstb       |           | Calr      | Nfkb2      |
| Glt8d3  | Tmprss13  | Tac1      | Ctbs       |           | Camk1d    | Nid1       |

|            |           |          |         |  |          |          |
|------------|-----------|----------|---------|--|----------|----------|
| Gmfg       | Tnfaip6   | Tbxas1   | Cthrc1  |  | Camk2n1  | Nsg1     |
| Golim4     | Tnfrsf1b  | Tfrc     | Ctnnd1  |  | Camkk2   | Pabpc1   |
| Gp49a      | Tnxb      | Timp2    | Cul2    |  | Cap1     | Pak1     |
| Gpatch4    | Tpmt      | Tmed3    | Cul4b   |  | Capg     | Pak3     |
| Gpm6b      | Trav7d-2  | Tmem100  | Cx3cr1  |  | Capn2    | Pcdhb7   |
| Gpnmb      | Trp53inp2 | Tmem176a | Cyb5r1  |  | Capz1    | Pcolce   |
| Gpr137b-ps | Tubb6     | Tnfrsf23 | Cyfp1   |  | Car13    | Pde8a    |
| Gprc5b     | Txndc2    | Trak2    | Cygb    |  | Car5b    | Pdia4    |
| Grm1       | Tyk2      | Trem2    | Cyth3   |  | Carhsp1  | Pdlim3   |
| Grn        | Zeb2      | Tspo     | Dagla   |  | Casp12   | Pdlim5   |
| Grpel2     | Zfp367    | Tubb2c   | Daglb   |  | Casp3    | Pdpn     |
| Gsta1      |           | Tyrobp   | Dchs1   |  | Casp4    | Pi16     |
| Gsta2      |           | Uap1     | Dctn5   |  | Cbr2     | Picalm   |
| Hcfc2      |           | Vav1     | Dcun1d3 |  | Ccdc136  | Pkd1     |
| Hck        |           | Vsig4    | Ddah1   |  | Ccdc68   | Plat     |
| Hcls1      |           | Wdr32    | Ddah2   |  | Ccdc80   | Plek     |
| Hecw2      |           | Zcchc5   | Ddef2   |  | Ccdc88a  | Plod3    |
| Hmcn2      |           | Zfp462   | Ddost   |  | Ccl21a   | Ppml e   |
| Hmgn3      |           |          | Ddx41   |  | Ccl6     | Pros1    |
| Hmox1      |           |          | Dennd2a |  | Ccl8     | Prr13    |
| Hpcal1     |           |          | Dennd5a |  | Ccl9     | Ptpn6    |
| Hsp90b1    |           |          | Depdc5  |  | Ccr1     | Ptprc    |
| Hspa11     |           |          | Dhcr24  |  | Cd109    | Rab23    |
| Hspa2      |           |          | Dhx9    |  | Cd14     | Rac2     |
| Hsph1      |           |          | Diap1   |  | Cd248    | Rarres2  |
| Hyal2      |           |          | Dlg5    |  | Cd24a    | Rassf2   |
| Ifi30      |           |          | Dnajc10 |  | Cd302    | Rcan1    |
| Ifitm2     |           |          | Dnajc14 |  | Cd33     | Rcn3     |
| Ifngr1     |           |          | Dock6   |  | Cd34     | Rexo2    |
| Ifrd1      |           |          | Dock8   |  | Cd37     | S100a10  |
| Igf1       |           |          | Dpep2   |  | Cd44     | S100a11  |
| Igf2bp2    |           |          | Dtx3    |  | Cd47     | S100a6   |
| Igfbp6     |           |          | Dtx4    |  | Cd48     | Scepe1   |
| Igsf6      |           |          | Dusp4   |  | Cd53     | Sdf211   |
| Il17ra     |           |          | Dync1i2 |  | Cd55     | Sec61a1  |
| Il1r1      |           |          | Dync1i1 |  | Cd63     | Selplg   |
| Il4ra      |           |          | Dync2h1 |  | Cd68     | Sema4a   |
| Inpp5d     |           |          | Dzip1   |  | Cd80     | Sfrp1    |
| Ins1       |           |          | Ebf1    |  | Cd84     | Sfxn3    |
| Ints3      |           |          | Ect2    |  | Cd86     | Sla      |
| Iqgap1     |           |          | Edem2   |  | Cd9      | Slc11a1  |
| Irf5       |           |          | Efha1   |  | Cdc42se1 | Slc35b4  |
| Irf8       |           |          | Ehd3    |  | Cdh11    | Slc6a9   |
| Kcnn3      |           |          | Ehd4    |  | Cdk5rap2 | Slc7a5   |
| Kcnq5      |           |          | Ehmt2   |  | Cdk8     | Slc7a7   |
| Klhl13     |           |          | Eid1    |  | Cdr2     | Slc9a7   |
| Klhl2      |           |          | Eif1a   |  | Cebpa    | Smc4     |
| Lair1      |           |          | Eif2ak3 |  | Cebpd    | Socs2    |
| Lamc1      |           |          | Eif3a   |  | Cebpg    | Sparc    |
| Laptm5     |           |          | Eif4a1  |  | Cep170   | Ssr2     |
| Lbp        |           |          | Eif5a2  |  | Cep192   | Stab1    |
| Lcn2       |           |          | Eif6    |  | Cfb      | Stx11    |
| Lcp1       |           |          | Elmo2   |  | Cfh      | Taok3    |
| Lcp2       |           |          | Elovl6  |  | Cfi      | Tctn2    |
| Ldlr       |           |          | Elp2    |  | Cfp      | Timp1    |
| Lepre11    |           |          | Eml4    |  | Chi311   | Tm6sf1   |
| Lgals3     |           |          | Endod1  |  | Chrd11   | Tmem106a |
| Lox        |           |          | Enpp3   |  | Chst12   | Tmem39a  |
| Lox11      |           |          | Epha7   |  | Cilp     | Tmem43   |
| Lox12      |           |          | Eprs    |  | Ckap4    | Tnc      |
| Lox14      |           |          | Erbb2ip |  | Ckmt1    | Tns3     |
| Lpin3      |           |          | Ergic1  |  | Clcn5    | Tram2    |
| Lpp        |           |          | Ergic3  |  | Clec11a  | Trf      |
| Lrp8       |           |          | Erlin1  |  | Clec2d   | Trpv4    |
| Lsm6       |           |          | Ero11   |  | Clec4a1  | Tubb5    |
| Ly86       |           |          | Evi2a   |  | Clec4a3  | Twf1     |
| Mak10      |           |          | Evi5    |  | Clec4d   | Uchl1    |
| Malt1      |           |          | Exoc5   |  | Clec4n   | Uck2     |
| Man2a1     |           |          | Exoc6b  |  | Clic1    | Ucp2     |

|         |  |  |         |  |            |         |
|---------|--|--|---------|--|------------|---------|
| Map3k6  |  |  | F2r     |  | Clip3      | Unc93b1 |
| Matn2   |  |  | Fads2   |  | Cmah       | Vim     |
| Mertk   |  |  | Fam105b |  | Cmklr1     | Wipf1   |
| Mfsd1   |  |  | Fam115a |  | Cndp2      | Zdhhc2  |
| Mgat4b  |  |  | Fam122b |  | Cnn3       |         |
| Mmp14   |  |  | Fam124a |  | Cnot6      |         |
| Mmp19   |  |  | Fam126b |  | Cnpy4      |         |
| Mmp3    |  |  | Fam13c  |  | Col12a1    |         |
| Mmm1    |  |  | Fam162a |  | Col14a1    |         |
| Mrm1    |  |  | Fam164a |  | Col15a1    |         |
| Ms4a4d  |  |  | Fam20a  |  | Col16a1    |         |
| Ms4a6b  |  |  | Fam20c  |  | Col18a1    |         |
| Ms4a7   |  |  | Fam26e  |  | Col1a1     |         |
| Msn     |  |  | Fam38b  |  | Col1a2     |         |
| Mtap1b  |  |  | Fam38b2 |  | Col3a1     |         |
| Mtmr11  |  |  | Fam3a   |  | Col4a2     |         |
| Myd116  |  |  | Fam46a  |  | Col4a4     |         |
| Myolf   |  |  | Fam48a  |  | Col4a5     |         |
| Myo7a   |  |  | Fam50a  |  | Col5a1     |         |
| Myof    |  |  | Fbln7   |  | Col5a2     |         |
| Nckap11 |  |  | Fbn2    |  | Col6a1     |         |
| Nfkb2   |  |  | Fbxw17  |  | Col6a2     |         |
| Nid1    |  |  | Fdps    |  | Col6a3     |         |
| Nid2    |  |  | Fez2    |  | Col8a1     |         |
| Nme5    |  |  | Fgd2    |  | Colec12    |         |
| Nsg1    |  |  | Fkbp10  |  | Comp       |         |
| Nudcd1  |  |  | Fkbp9   |  | Coro1a     |         |
| Nudt5   |  |  | Flnc    |  | Cotl1      |         |
| Nxt1    |  |  | Fmr1    |  | Cp         |         |
| Opalin  |  |  | Fosl2   |  | Cpeb1      |         |
| Pabpc1  |  |  | Frem1   |  | Cpne2      |         |
| Pak1    |  |  | Fstl3   |  | Cpne8      |         |
| Pak3    |  |  | Fzd2    |  | Cpt1c      |         |
| Pcdhb7  |  |  | Galns   |  | Cpxm1      |         |
| Pcolce  |  |  | Gan     |  | Cpxm2      |         |
| Pde8a   |  |  | Gas1    |  | Creb3l1    |         |
| Pdia4   |  |  | Gas2l1  |  | Creb3l2    |         |
| Pdlim3  |  |  | Gbe1    |  | Creld2     |         |
| Pdlim5  |  |  | Gbgt1   |  | Crispld1   |         |
| Pdpc1   |  |  | Gclc    |  | Crispld2   |         |
| Pdpcn   |  |  | Gdf6    |  | Crlf1      |         |
| Peli1   |  |  | Gfpt1   |  | Crtap      |         |
| Peli3   |  |  | Glb1    |  | Csf1r      |         |
| Pgf     |  |  | Glb1l   |  | Csf2ra     |         |
| Phyhip  |  |  | Gli2    |  | Csf2rb     |         |
| Pi16    |  |  | Glt8d1  |  | Csf2rb2    |         |
| Picalm  |  |  | Gmppa   |  | Csgalnact1 |         |
| Pkd1    |  |  | Gnb1    |  | Cspp1      |         |
| Plat    |  |  | Gng12   |  | Csrp1      |         |
| Plek    |  |  | Gng8    |  | Csrp2      |         |
| Plekha3 |  |  | Golgb1  |  | Cst3       |         |
| Plod3   |  |  | Gosr2   |  | Ctdspl     |         |
| Ppap2a  |  |  | Gpr52   |  | Ctgf       |         |
| Ppil6   |  |  | Gpx8    |  | Ctla2a     |         |
| Ppm1e   |  |  | Grip1   |  | Ctps2      |         |
| Pros1   |  |  | Gss     |  | Ctsb       |         |
| Prr13   |  |  | Gtpbp4  |  | Ctsc       |         |
| Ptgs2   |  |  | Gucy1a3 |  | Ctsh       |         |
| Ptgr1   |  |  | Gucy1b3 |  | Ctsk       |         |
| Ptpn6   |  |  | Gulp1   |  | Ctss       |         |
| Ptpn9   |  |  | Gyg     |  | Ctsz       |         |
| Ptprc   |  |  | H3f3b   |  | Ctnn       |         |
| Qprt    |  |  | Hbegf   |  | Ctnnbp2nl  |         |
| Rab13   |  |  | Hdgfrp3 |  | Cx3cl1     |         |
| Rab23   |  |  | Heatr5a |  | Cxcl16     |         |
| Rab27a  |  |  | Hgs     |  | Cxcr4      |         |
| Rac2    |  |  | Hhipl1  |  | Cyb561     |         |
| Rap2a   |  |  | Hiatl1  |  | Cyb5r3     |         |
| Rarres2 |  |  | Hif1a   |  | Cyba       |         |

|           |  |          |         |
|-----------|--|----------|---------|
| Rars      |  | Hivep1   | Cybb    |
| Rasgef1b  |  | Hltf     | Cyld    |
| Rassf2    |  | Hmgcr    | Cyp1b1  |
| Rassf4    |  | Hmgcn3   | Cyp20a1 |
| Rcan1     |  | Hn1      | Cyp27a1 |
| Rcn3      |  | Hr       | Cyp39a1 |
| Rexo2     |  | Hs2st1   | Cyp7b1  |
| Rfxank    |  | Hsd17b12 | Cysltr1 |
| Rhoc      |  | Hsd17b7  | Cyth4   |
| Rtn4rl1   |  | Hspa11   | Cyt11   |
| S100a10   |  | Hspbap1  | Dab2    |
| S100a11   |  | Hvcn1    | Dact1   |
| S100a6    |  | Hyal1    | Dap     |
| Scn2a1    |  | Icam1    | Dbn1    |
| Scpep1    |  | Id4      | Dbn1    |
| Sdf211    |  | Idi1     | Dcbld2  |
| Sec22b    |  | Iffo1    | Dclk1   |
| Sec61a1   |  | Ifrd1    | Dclre1c |
| Selplg    |  | Igsf3    | Dcn     |
| Sema3f    |  | Il17rc   | Dct     |
| Sema4a    |  | Il1rl2   | Ddr2    |
| Sema6b    |  | Il21r    | Ddx26b  |
| Sema7a    |  | Ints2    | Ddx58   |
| Serpinh1  |  | Ipo4     | Dennd4a |
| Sfrp1     |  | Ipo7     | Derl3   |
| Sfxn3     |  | Ipo9     | Des     |
| Sh3gl1    |  | Iqgap3   | Dio2    |
| Sla       |  | Irf5     | Disp1   |
| Slc11a1   |  | Ism1     | Dkk3    |
| Slc16a14  |  | Itga1    | Dnajb11 |
| Slc16a3   |  | Itga9    | Dnajc3  |
| Slc25a30  |  | Itgb1    | Dnm1    |
| Slc35b4   |  | Itgb3bp  | Dnm3os  |
| Slc39a13  |  | Itih4    | Dnmt1   |
| Slc39a14  |  | Itm2a    | Dock1   |
| Slc6a9    |  | Kbtbd11  | Dock10  |
| Slc7a5    |  | Kcnab2   | Dock11  |
| Slc7a7    |  | Kcnma1   | Dock2   |
| Slc9a7    |  | Kcnq5    | Dock7   |
| Slfn2     |  | Kctd10   | Dok1    |
| Smarca1   |  | Kctd17   | Dok5    |
| Smc4      |  | Kif13b   | Dopey2  |
| Socs2     |  | Kif1a    | Dpp3    |
| Socs3     |  | Kif21b   | Dpp7    |
| Sorbs3    |  | Kif3a    | Dpt     |
| Sparc     |  | Kif3c    | Dpy19l1 |
| Ssr2      |  | Kif5c    | Dpysl2  |
| St3gal1   |  | Klhl13   | Dpysl3  |
| Stab1     |  | Kpnb1    | Dse     |
| Stx11     |  | Krt80    | Dsel    |
| Stxbp6    |  | Lass2    | Dstn    |
| Taldo1    |  | Lass5    | Dynll1  |
| Taok3     |  | Ldlrad3  | Dzip3   |
| Tctex1d2  |  | Lepre1   | Ebf2    |
| Tctn2     |  | Lgals1   | Ece2    |
| Thop1     |  | Lgi2     | Ecm1    |
| Timp1     |  | Lhfp12   | Ecm2    |
| Tiparp    |  | Lmcd1    | Edem1   |
| Tlr7      |  | Lmo4     | Eef1a1  |
| Tm2d2     |  | Lonrf3   | Efemp2  |
| Tm6sf1    |  | Lpar4    | Efhd1   |
| Tmem106a  |  | Lrig3    | Efhd2   |
| Tmem39a   |  | Lrp5     | Egfr    |
| Tmem43    |  | Lrp8     | Egr2    |
| Tnc       |  | Lrrc25   | Eid3    |
| Tnfrsf11a |  | Lrrc40   | Elmo1   |
| Tns3      |  | Lrrc49   | Eln     |
| Tram2     |  | Lrrc51   | Elov11  |
| Trappc6b  |  | Lrrc59   | Emb     |

|          |  |  |          |  |          |  |
|----------|--|--|----------|--|----------|--|
| Trdn     |  |  | Lxn      |  | Emilin1  |  |
| Trf      |  |  | Ly9      |  | Emp1     |  |
| Trib3    |  |  | Lypd1    |  | Emp3     |  |
| Trp53i13 |  |  | Lyplal1  |  | Emr1     |  |
| Trpv4    |  |  | Lztr1    |  | Enah     |  |
| Tubb5    |  |  | Mak16    |  | Eno1     |  |
| Twf1     |  |  | Malt1    |  | Eno2     |  |
| Uchl1    |  |  | Mamdc2   |  | Enpp1    |  |
| Uck2     |  |  | Maml2    |  | Entpd1   |  |
| Ucp2     |  |  | Map3k3   |  | Entpd2   |  |
| Ugt1a9   |  |  | Map3k8   |  | Epb4.112 |  |
| Unc93b1  |  |  | Mapk7    |  | Ephx1    |  |
| Vim      |  |  | Mast4    |  | Eps15    |  |
| Wipf1    |  |  | Mbtps1   |  | Eps8     |  |
| Zbtb16   |  |  | Mcam     |  | Ero11b   |  |
| Zbtb8b   |  |  | Mcm2     |  | Esd      |  |
| Zdhhc2   |  |  | Mcm6     |  | Etv1     |  |
| Zfp133   |  |  | Mcm7     |  | Etv5     |  |
| Zfp826   |  |  | Mdk      |  | Etv6     |  |
|          |  |  | Me2      |  | Evc      |  |
|          |  |  | Med10    |  | Evc2     |  |
|          |  |  | Megf10   |  | Fads1    |  |
|          |  |  | Megf8    |  | Fam102b  |  |
|          |  |  | Mfap3    |  | Fam105a  |  |
|          |  |  | Mfsd10   |  | Fam114a1 |  |
|          |  |  | Mib1     |  | Fam129a  |  |
|          |  |  | Mik1     |  | Fam129b  |  |
|          |  |  | Mllt11   |  | Fam13b   |  |
|          |  |  | Mmgt2    |  | Fam149a  |  |
|          |  |  | Mmp3     |  | Fam168a  |  |
|          |  |  | Mpz11    |  | Fam3c    |  |
|          |  |  | Mttr12   |  | Fam70b   |  |
|          |  |  | Muc15    |  | Far1     |  |
|          |  |  | Mum111   |  | Farp1    |  |
|          |  |  | Mvp      |  | Fasn     |  |
|          |  |  | Myl12b   |  | Fat1     |  |
|          |  |  | Myl9     |  | Fbln1    |  |
|          |  |  | Myo1c    |  | Fbln2    |  |
|          |  |  | Myo9b    |  | Fbln5    |  |
|          |  |  | Myrip    |  | Fbn1     |  |
|          |  |  | Naalad12 |  | Fbxl16   |  |
|          |  |  | Nagk     |  | Fcer1g   |  |
|          |  |  | Naglu    |  | Fcgr1    |  |
|          |  |  | Napepld  |  | Fcgr2b   |  |
|          |  |  | Nckap1   |  | Fchsd2   |  |
|          |  |  | Necap2   |  | Fcrls    |  |
|          |  |  | Nedd9    |  | Fermt3   |  |
|          |  |  | Negr1    |  | Fgf7     |  |
|          |  |  | Nelf     |  | Fgfr1    |  |
|          |  |  | Nfat5    |  | Fgl2     |  |
|          |  |  | Nfkbie   |  | Fhl1     |  |
|          |  |  | Nfx11    |  | Fibin    |  |
|          |  |  | Nin      |  | Figf     |  |
|          |  |  | Nktr     |  | Fkbp14   |  |
|          |  |  | Nol3     |  | Fkbp7    |  |
|          |  |  | Nop58    |  | Flna     |  |
|          |  |  | Nppb     |  | Flrt2    |  |
|          |  |  | Npr3     |  | Flt3l    |  |
|          |  |  | Nr6a1    |  | Flt4     |  |
|          |  |  | Nrg1     |  | Fmnl2    |  |
|          |  |  | Nt5e     |  | Fmod     |  |
|          |  |  | Nuak1    |  | Fn1      |  |
|          |  |  | Nucb1    |  | Fndc1    |  |
|          |  |  | Nudt5    |  | Fndc3a   |  |
|          |  |  | Nup205   |  | Fndc3b   |  |
|          |  |  | Nup93    |  | Folr2    |  |
|          |  |  | Oaf      |  | Foxp1    |  |
|          |  |  | Obscn    |  | Foxp2    |  |
|          |  |  | Olfm1    |  | Frmd4b   |  |



|  |  |          |            |
|--|--|----------|------------|
|  |  | Omd      | Frzb       |
|  |  | Ophn1    | Fstl1      |
|  |  | Orc2l    | Ftl1       |
|  |  | Osdbl5   | Ftl2       |
|  |  | Osdbl9   | Fuca1      |
|  |  | P4ha3    | Fut11      |
|  |  | Pacs2    | Fxyd5      |
|  |  | Paf1     | Fxyd6      |
|  |  | Pak2     | Fyb        |
|  |  | Pard3b   | Fzd1       |
|  |  | Parn     | Fzd7       |
|  |  | Parva    | G6pdx      |
|  |  | Pcdhb13  | Gab2       |
|  |  | Pcnp     | Gadd45g    |
|  |  | Pcnxl3   | Galc       |
|  |  | Pcsk5    | Galntl1    |
|  |  | Pdcd6ip  | Gars       |
|  |  | Pde10a   | Gas2l3     |
|  |  | Pde5a    | Gas5       |
|  |  | Pdgfrb   | Gas6       |
|  |  | Peg10    | Gas7       |
|  |  | Peli1    | Gatm       |
|  |  | Pemt     | Gba        |
|  |  | Pes1     | Gclm       |
|  |  | Pfkfb4   | Gcnt2      |
|  |  | Pgm3     | Gda        |
|  |  | Phgdh    | Gdap2      |
|  |  | Phldb2   | Gdf15      |
|  |  | Pi15     | Gfpt2      |
|  |  | Pias3    | Ggh        |
|  |  | Pigb     | Gla        |
|  |  | Pigt     | Glecc1     |
|  |  | Pik3ap1  | Gli3       |
|  |  | Pik3c2a  | Glipr2     |
|  |  | Pik3r5   | Glis2      |
|  |  | Pikfyve  | Glt8d4     |
|  |  | Pknox2   | Gltp       |
|  |  | Pla2g15  | Gm2a       |
|  |  | Pla2r1   | Gm885      |
|  |  | Plac9    | Gmfb       |
|  |  | Plagl1   | Gmfg       |
|  |  | Plcb1    | Gmip       |
|  |  | Plce1    | Gna13      |
|  |  | Pld1     | Gnai2      |
|  |  | Pldn     | Gnai3      |
|  |  | Plekha3  | Gnao1      |
|  |  | Plekhg2  | Golim4     |
|  |  | Plekho2  | Golt1b     |
|  |  | Plod2    | Gp49a      |
|  |  | Plxna3   | Gpc4       |
|  |  | Plxna4   | Gpc6       |
|  |  | Pml      | Gpm6b      |
|  |  | Pmm1     | Gpnm6      |
|  |  | Podn     | Gpr124     |
|  |  | Pola1    | Gpr133     |
|  |  | Pold4    | Gpr137b    |
|  |  | Pole3    | Gpr137b-ps |
|  |  | Pon3     | Gpr153     |
|  |  | Ppfial   | Gpr161     |
|  |  | Ppfibp1  | Gpr177     |
|  |  | Ppic     | Gpr64      |
|  |  | Ppmlm    | Gpr65      |
|  |  | Ppp1r14b | Gprc5b     |
|  |  | Ppp1r3c  | Gpx1       |
|  |  | Ppp1r9b  | Gpx3       |
|  |  | Prc1     | Gria3      |
|  |  | Prex1    | Grin2c     |
|  |  | Prh1     | Grk5       |
|  |  | Prim1    | Grn        |

|  |  |  |          |  |          |  |
|--|--|--|----------|--|----------|--|
|  |  |  | Prim2    |  | Gsn      |  |
|  |  |  | Prkab2   |  | Gsta1    |  |
|  |  |  | Prkar1a  |  | Gsta2    |  |
|  |  |  | Prkca    |  | Gtf2h1   |  |
|  |  |  | Prkcdbp  |  | Gusb     |  |
|  |  |  | Prkci    |  | H2-Aa    |  |
|  |  |  | Prkcsh   |  | H2-Eb1   |  |
|  |  |  | Prmt2    |  | H2-T10   |  |
|  |  |  | Prrg3    |  | Hck      |  |
|  |  |  | Prune2   |  | Hcls1    |  |
|  |  |  | Psmc8    |  | Hdac1    |  |
|  |  |  | Ptgs2    |  | Hectd1   |  |
|  |  |  | Ptges    |  | Hectd2   |  |
|  |  |  | Ptgs1    |  | Heg1     |  |
|  |  |  | Pth1r    |  | Hexa     |  |
|  |  |  | Ptplad2  |  | Hexb     |  |
|  |  |  | Ptpn13   |  | Hfe      |  |
|  |  |  | Ptpn23   |  | Hgf      |  |
|  |  |  | Ptpn9    |  | Hip1     |  |
|  |  |  | Ptpra    |  | Hmha1    |  |
|  |  |  | Ptrh1    |  | Hmox1    |  |
|  |  |  | Pvrl1    |  | Hn11     |  |
|  |  |  | Pycr1    |  | Hnrmpa3  |  |
|  |  |  | Qser1    |  | Hnrnpf   |  |
|  |  |  | R3hcc1   |  | Hps3     |  |
|  |  |  | Rab34    |  | Hpse     |  |
|  |  |  | Rab3gap2 |  | Hsp90aa1 |  |
|  |  |  | Rab43    |  | Hsp90b1  |  |
|  |  |  | Rab5c    |  | Hspa13   |  |
|  |  |  | Rab15    |  | Hspa1a   |  |
|  |  |  | Rad18    |  | Hspb1    |  |
|  |  |  | Rad50    |  | Htra3    |  |
|  |  |  | Rad9     |  | Htra4    |  |
|  |  |  | Rag1ap1  |  | Hyou1    |  |
|  |  |  | Raph1    |  | Iah1     |  |
|  |  |  | Rars     |  | Id2      |  |
|  |  |  | Rasgef1a |  | Ifi202b  |  |
|  |  |  | Rasl11b  |  | Ifi204   |  |
|  |  |  | Rassf4   |  | Ifi205   |  |
|  |  |  | Rbm3     |  | Ifi2711  |  |
|  |  |  | Rbm47    |  | Ifi2712a |  |
|  |  |  | Rcn1     |  | Ifi30    |  |
|  |  |  | Rdh11    |  | Ifih1    |  |
|  |  |  | Recql    |  | Ifitm2   |  |
|  |  |  | Relb     |  | Ifitm3   |  |
|  |  |  | Reps2    |  | Ifngr1   |  |
|  |  |  | Rftn2    |  | Ift122   |  |
|  |  |  | Rgs10    |  | Ift80    |  |
|  |  |  | Rgs11    |  | Igf1     |  |
|  |  |  | Rgs19    |  | Igf1r    |  |
|  |  |  | Rhbdf1   |  | Igf2bp2  |  |
|  |  |  | Rhoc     |  | Igfbp4   |  |
|  |  |  | Ric3     |  | Igfbp5   |  |
|  |  |  | Rnd1     |  | Igfbp6   |  |
|  |  |  | Rnf149   |  | Igfbp7   |  |
|  |  |  | Rnf2     |  | Igsf10   |  |
|  |  |  | Rnft1    |  | Igsf6    |  |
|  |  |  | Rock2    |  | Ikbke    |  |
|  |  |  | Rod1     |  | Ii10ra   |  |
|  |  |  | Rp2h     |  | Ii16     |  |
|  |  |  | Rpe      |  | Ii17ra   |  |
|  |  |  | Rpl39    |  | Ii17rd   |  |
|  |  |  | Rps12    |  | Ii1r1    |  |
|  |  |  | Rrm2     |  | Ii33     |  |
|  |  |  | Rrp12    |  | Ii4ra    |  |
|  |  |  | Rsu1     |  | Ii6ra    |  |
|  |  |  | Rtp4     |  | Ii6st    |  |
|  |  |  | Runx2    |  | Ildr2    |  |
|  |  |  | Ryr3     |  | Iik      |  |

|  |  |  |           |  |          |  |
|--|--|--|-----------|--|----------|--|
|  |  |  | Samd4     |  | Inpp5d   |  |
|  |  |  | Samd4b    |  | Inpp5f   |  |
|  |  |  | Sardh     |  | Ints3    |  |
|  |  |  | Sars      |  | Invs     |  |
|  |  |  | Sash1     |  | Iqgap1   |  |
|  |  |  | Scarf2    |  | Irak3    |  |
|  |  |  | Scd2      |  | Irak4    |  |
|  |  |  | Sdc1      |  | Irf9     |  |
|  |  |  | Sdc4      |  | Islr     |  |
|  |  |  | Sec11a    |  | Itga11   |  |
|  |  |  | Sec24d    |  | Itga5    |  |
|  |  |  | Sema3b    |  | Itgam    |  |
|  |  |  | Sema3d    |  | Itgav    |  |
|  |  |  | Serf2     |  | Itgb1bp3 |  |
|  |  |  | Serpinb1c |  | Itgb2    |  |
|  |  |  | Serpinb6a |  | Itgb5    |  |
|  |  |  | Setbp1    |  | Itgb8    |  |
|  |  |  | Sfrp4     |  | Itgb11   |  |
|  |  |  | Sfxn1     |  | Itih2    |  |
|  |  |  | Sgsh      |  | Itih5    |  |
|  |  |  | Sh3gl1    |  | Itm2c    |  |
|  |  |  | Sh3kbp1   |  | Itpk1    |  |
|  |  |  | She1      |  | Itpripl2 |  |
|  |  |  | She2      |  | Itsn1    |  |
|  |  |  | Shisa3    |  | Jag1     |  |
|  |  |  | Shkbp1    |  | Jak2     |  |
|  |  |  | Sipa111   |  | Kalrn    |  |
|  |  |  | Slamf9    |  | Kcne4    |  |
|  |  |  | Slc10a7   |  | Kcnk6    |  |
|  |  |  | Slc13a4   |  | Kcnn3    |  |
|  |  |  | Slc16a2   |  | Kcnt2    |  |
|  |  |  | Slc16a3   |  | Kdelc2   |  |
|  |  |  | Slc16a6   |  | Kdelr3   |  |
|  |  |  | Slc17a5   |  | Kif3b    |  |
|  |  |  | Slc1a1    |  | Kif5b    |  |
|  |  |  | Slc1a2    |  | Kirrel   |  |
|  |  |  | Slc1a3    |  | Klc1     |  |
|  |  |  | Slc20a1   |  | Klhl29   |  |
|  |  |  | Slc25a1   |  | Klraq1   |  |
|  |  |  | Slc25a17  |  | Krt18    |  |
|  |  |  | Slc2a10   |  | Ktelc1   |  |
|  |  |  | Slc2a13   |  | Lamc1    |  |
|  |  |  | Slc35d2   |  | Lamp2    |  |
|  |  |  | Slc35e4   |  | Laptm5   |  |
|  |  |  | Slc36a4   |  | Lass6    |  |
|  |  |  | Slc39a13  |  | Lats1    |  |
|  |  |  | Slc43a2   |  | Layn     |  |
|  |  |  | Slc5a3    |  | Lbp      |  |
|  |  |  | Slc6a6    |  | Lcp1     |  |
|  |  |  | Slc7a2    |  | Ldlr     |  |
|  |  |  | Slfn2     |  | Leprel1  |  |
|  |  |  | Smap1     |  | Leprel2  |  |
|  |  |  | Smo       |  | Leprot   |  |
|  |  |  | Smoc1     |  | Lgals3   |  |
|  |  |  | Smurf2    |  | Lgals3bp |  |
|  |  |  | Snhg1     |  | Lgals9   |  |
|  |  |  | Snx29     |  | Lgmn     |  |
|  |  |  | Snx6      |  | Lhfp     |  |
|  |  |  | Snx9      |  | Lig1     |  |
|  |  |  | Sorbs2    |  | Lilrb3   |  |
|  |  |  | Sorbs3    |  | Lilrb4   |  |
|  |  |  | Sox9      |  | Lipa     |  |
|  |  |  | Spats2    |  | Litaf    |  |
|  |  |  | Spcs3     |  | Lmna     |  |
|  |  |  | Spg21     |  | Lox      |  |
|  |  |  | Sphk1     |  | Lox11    |  |
|  |  |  | Spire1    |  | Lox12    |  |
|  |  |  | Spna2     |  | Lox13    |  |
|  |  |  | Spns2     |  | Lox14    |  |

|  |  |           |         |
|--|--|-----------|---------|
|  |  | Spon1     | Lpar1   |
|  |  | Spon2     | Lpcat2  |
|  |  | Spred1    | Lpin2   |
|  |  | Spry1     | Lpp     |
|  |  | Sqle      | Lrp1    |
|  |  | Sqstm1    | Lrrc16a |
|  |  | Srbd1     | Lrrk1   |
|  |  | Srebf2    | Lrm4cl  |
|  |  | Srgap2    | Lsm6    |
|  |  | Srgap3    | Lsp1    |
|  |  | Sri       | Ltbp2   |
|  |  | Ssu72     | Ltbp3   |
|  |  | St3gal2   | Ltbp4   |
|  |  | Stam2     | Lum     |
|  |  | Star      | Ly6a    |
|  |  | Stard5    | Ly86    |
|  |  | Stk3      | Lyst    |
|  |  | Ston1     | Lyz1    |
|  |  | Stt3b     | Lyz2    |
|  |  | Sugt1     | Maf     |
|  |  | Sumf1     | Mafk    |
|  |  | Supt5h    | Maged2  |
|  |  | Tacc3     | Mamld1  |
|  |  | Taf1      | Man1a   |
|  |  | Tax1bp3   | Man1a2  |
|  |  | Tbc1d2b   | Man2a1  |
|  |  | Tbcd      | Man2b1  |
|  |  | Tbcel     | Man2b2  |
|  |  | Tbl1x     | Maoa    |
|  |  | Tc2n      | Map3k12 |
|  |  | Tceal     | Map3k14 |
|  |  | Tceb3     | Mapre1  |
|  |  | Tcf3      | Marcks  |
|  |  | Tcfe3     | Mark1   |
|  |  | Tgfb1     | Matn2   |
|  |  | Tgfb1i1   | Mbc2    |
|  |  | Thbs1     | Mcm3    |
|  |  | Tiam2     | Mdfic   |
|  |  | Tln1      | Med15   |
|  |  | Tlr13     | Meg3    |
|  |  | Tlr4      | Meox1   |
|  |  | Tm7sf3    | Mertk   |
|  |  | Tm9sf3    | Mfap2   |
|  |  | Tmed10    | Mfap4   |
|  |  | Tmem104   | Mfap5   |
|  |  | Tmem123   | Mfge8   |
|  |  | Tmem138   | Mfsd1   |
|  |  | Tmem144   | Mfsd6   |
|  |  | Tmem184b  | Mgat2   |
|  |  | Tmem219   | Mgl1    |
|  |  | Tmem49    | Mgl2    |
|  |  | Tmem62    | Mgp     |
|  |  | Tmsb4x    | Mical1  |
|  |  | Tnfaip3   | Mical2  |
|  |  | Tnfrsf12a | Mif     |
|  |  | Tnfrsf23  | Mlec    |
|  |  | Topbp1    | Mmp12   |
|  |  | Tor3a     | Mmp14   |
|  |  | Traf3     | Mmp19   |
|  |  | Traf7     | Mmp2    |
|  |  | Trak2     | Mmp23   |
|  |  | Trem2     | Mmrn1   |
|  |  | Trerf1    | Mobkl1b |
|  |  | Trib3     | Mobkl2a |
|  |  | Trim2     | Morc3   |
|  |  | Trim37    | Morf412 |
|  |  | Trim44    | Mpeg1   |
|  |  | Trip13    | Mpp1    |
|  |  | Trove2    | Mras    |

|  |  |  |           |  |           |  |
|--|--|--|-----------|--|-----------|--|
|  |  |  | Trp53     |  | Mrc1      |  |
|  |  |  | Tspan6    |  | Mrc2      |  |
|  |  |  | Tspan9    |  | Ms4a14    |  |
|  |  |  | Tssec4    |  | Ms4a4a    |  |
|  |  |  | Ttbk2     |  | Ms4a6b    |  |
|  |  |  | Ttc9      |  | Ms4a6c    |  |
|  |  |  | Ttyh3     |  | Ms4a6d    |  |
|  |  |  | Tubb2b    |  | Ms4a7     |  |
|  |  |  | Tubb6     |  | Msn       |  |
|  |  |  | Tulp3     |  | Msr1      |  |
|  |  |  | Tulp4     |  | Mt2       |  |
|  |  |  | Txndc16   |  | Mtap1a    |  |
|  |  |  | Tyms      |  | Mtap1b    |  |
|  |  |  | Ube2e2    |  | Mtap4     |  |
|  |  |  | Ube2l6    |  | Mtap6     |  |
|  |  |  | Ubd2      |  | Mtap7d3   |  |
|  |  |  | Ugt1a9    |  | Mthfd2    |  |
|  |  |  | Uhrf1     |  | Mtmr11    |  |
|  |  |  | Uhrf1bp11 |  | Mtmr6     |  |
|  |  |  | Ulk3      |  | Mtpn      |  |
|  |  |  | Unc5b     |  | Mxra7     |  |
|  |  |  | Usp47     |  | Mxra8     |  |
|  |  |  | Usp6nl    |  | Myb11     |  |
|  |  |  | Vamp7     |  | Myc       |  |
|  |  |  | Vav1      |  | Mycbp2    |  |
|  |  |  | Vav3      |  | Myh10     |  |
|  |  |  | Vegfc     |  | Myh7      |  |
|  |  |  | Vgl13     |  | Myh9      |  |
|  |  |  | Vrk2      |  | Myo1d     |  |
|  |  |  | Wbp5      |  | Myo1e     |  |
|  |  |  | Wdfy1     |  | Myo1f     |  |
|  |  |  | Wdr47     |  | Myo1g     |  |
|  |  |  | Wdr67     |  | Myo5a     |  |
|  |  |  | Wwp2      |  | Myo7a     |  |
|  |  |  | Wwtr1     |  | Myo9a     |  |
|  |  |  | Xirp2     |  | Myoc      |  |
|  |  |  | Xpot      |  | Myof      |  |
|  |  |  | Yars      |  | Naaa      |  |
|  |  |  | Yipf1     |  | Naalad2   |  |
|  |  |  | Ywhab     |  | Nab1      |  |
|  |  |  | Zbtb7c    |  | Nalcn     |  |
|  |  |  | Zc3h7a    |  | Nans      |  |
|  |  |  | Zc4h2     |  | Nap111    |  |
|  |  |  | Zcchc24   |  | Nars      |  |
|  |  |  | Zdhhc24   |  | Nav1      |  |
|  |  |  | Zfhx3     |  | Nbl1      |  |
|  |  |  | Zfp260    |  | Ncam1     |  |
|  |  |  | Zfp354c   |  | Ncapg2    |  |
|  |  |  | Zfp462    |  | Ncf1      |  |
|  |  |  | Zmiz1     |  | Ncf2      |  |
|  |  |  | Zswim4    |  | Nckap11   |  |
|  |  |  |           |  | Ncoa7     |  |
|  |  |  |           |  | Ndn       |  |
|  |  |  |           |  | Ndr4      |  |
|  |  |  |           |  | Nek6      |  |
|  |  |  |           |  | Neur13    |  |
|  |  |  |           |  | Nfatc4    |  |
|  |  |  |           |  | Nfil3     |  |
|  |  |  |           |  | Nfkb1     |  |
|  |  |  |           |  | Nfkb2     |  |
|  |  |  |           |  | Nfkbiz    |  |
|  |  |  |           |  | Nfya      |  |
|  |  |  |           |  | Ngef      |  |
|  |  |  |           |  | Ngf       |  |
|  |  |  |           |  | Nid1      |  |
|  |  |  |           |  | Nipsnap3a |  |
|  |  |  |           |  | Nkd2      |  |
|  |  |  |           |  | Nlgn2     |  |
|  |  |  |           |  | Nme1      |  |

|  |  |  |  |  |          |  |
|--|--|--|--|--|----------|--|
|  |  |  |  |  | Nmt2     |  |
|  |  |  |  |  | Notch2   |  |
|  |  |  |  |  | Nox4     |  |
|  |  |  |  |  | Npc2     |  |
|  |  |  |  |  | Npdc1    |  |
|  |  |  |  |  | Npl      |  |
|  |  |  |  |  | Npm1     |  |
|  |  |  |  |  | Nppa     |  |
|  |  |  |  |  | Nsdhl    |  |
|  |  |  |  |  | Nsg1     |  |
|  |  |  |  |  | Nt5c     |  |
|  |  |  |  |  | Nuak2    |  |
|  |  |  |  |  | Nubp1    |  |
|  |  |  |  |  | Nucb2    |  |
|  |  |  |  |  | Numbl    |  |
|  |  |  |  |  | Nupr1    |  |
|  |  |  |  |  | Oas2     |  |
|  |  |  |  |  | Oasl2    |  |
|  |  |  |  |  | Odz3     |  |
|  |  |  |  |  | Ogn      |  |
|  |  |  |  |  | Olfml1   |  |
|  |  |  |  |  | Olfml2b  |  |
|  |  |  |  |  | Olfml3   |  |
|  |  |  |  |  | Os9      |  |
|  |  |  |  |  | Osmr     |  |
|  |  |  |  |  | Ostc     |  |
|  |  |  |  |  | Otub2    |  |
|  |  |  |  |  | P2rx4    |  |
|  |  |  |  |  | P2rx7    |  |
|  |  |  |  |  | P2ry6    |  |
|  |  |  |  |  | P4ha1    |  |
|  |  |  |  |  | P4hb     |  |
|  |  |  |  |  | Pabpc1   |  |
|  |  |  |  |  | Pafah1b2 |  |
|  |  |  |  |  | Pak1     |  |
|  |  |  |  |  | Pak3     |  |
|  |  |  |  |  | Pam      |  |
|  |  |  |  |  | Pamr1    |  |
|  |  |  |  |  | Panx1    |  |
|  |  |  |  |  | Papd4    |  |
|  |  |  |  |  | Papss2   |  |
|  |  |  |  |  | Parp3    |  |
|  |  |  |  |  | Parp9    |  |
|  |  |  |  |  | Parvg    |  |
|  |  |  |  |  | Pbx3     |  |
|  |  |  |  |  | Pcdh9    |  |
|  |  |  |  |  | Pcdhb16  |  |
|  |  |  |  |  | Pcdhb7   |  |
|  |  |  |  |  | Pcolce   |  |
|  |  |  |  |  | Pcolce2  |  |
|  |  |  |  |  | Pcyox1   |  |
|  |  |  |  |  | Pdcd4    |  |
|  |  |  |  |  | Pde1a    |  |
|  |  |  |  |  | Pde3b    |  |
|  |  |  |  |  | Pde7b    |  |
|  |  |  |  |  | Pde8a    |  |
|  |  |  |  |  | Pdgfc    |  |
|  |  |  |  |  | Pdgfra   |  |
|  |  |  |  |  | Pdgfrl   |  |
|  |  |  |  |  | Pdia3    |  |
|  |  |  |  |  | Pdia4    |  |
|  |  |  |  |  | Pdia6    |  |
|  |  |  |  |  | Pdk3     |  |
|  |  |  |  |  | Pdlim3   |  |
|  |  |  |  |  | Pdlim5   |  |
|  |  |  |  |  | Pdlim7   |  |
|  |  |  |  |  | Pdpn     |  |
|  |  |  |  |  | Pdzd11   |  |
|  |  |  |  |  | Pea15a   |  |

|  |  |  |  |  |          |  |
|--|--|--|--|--|----------|--|
|  |  |  |  |  | Pfkfb3   |  |
|  |  |  |  |  | Pfkip    |  |
|  |  |  |  |  | Pftk1    |  |
|  |  |  |  |  | Pgam1    |  |
|  |  |  |  |  | Pgcp     |  |
|  |  |  |  |  | Pgd      |  |
|  |  |  |  |  | Pgm1     |  |
|  |  |  |  |  | Phf21a   |  |
|  |  |  |  |  | Phka1    |  |
|  |  |  |  |  | Phlda3   |  |
|  |  |  |  |  | Phtf1    |  |
|  |  |  |  |  | Pi16     |  |
|  |  |  |  |  | Pi4k2a   |  |
|  |  |  |  |  | Picalm   |  |
|  |  |  |  |  | Pik3cg   |  |
|  |  |  |  |  | Pip4k2a  |  |
|  |  |  |  |  | Pira2    |  |
|  |  |  |  |  | Pisd-ps1 |  |
|  |  |  |  |  | Pkd1     |  |
|  |  |  |  |  | Pkd2     |  |
|  |  |  |  |  | Pla1a    |  |
|  |  |  |  |  | Pla2g4a  |  |
|  |  |  |  |  | Pla2g7   |  |
|  |  |  |  |  | Plaa     |  |
|  |  |  |  |  | Plat     |  |
|  |  |  |  |  | Plcb4    |  |
|  |  |  |  |  | Plcg2    |  |
|  |  |  |  |  | Pld3     |  |
|  |  |  |  |  | Pld4     |  |
|  |  |  |  |  | Plek     |  |
|  |  |  |  |  | Plekha4  |  |
|  |  |  |  |  | Plekho1  |  |
|  |  |  |  |  | Plk2     |  |
|  |  |  |  |  | Plod3    |  |
|  |  |  |  |  | Plp2     |  |
|  |  |  |  |  | Pls3     |  |
|  |  |  |  |  | Pltp     |  |
|  |  |  |  |  | Plvap    |  |
|  |  |  |  |  | Plxdc2   |  |
|  |  |  |  |  | Plxnb2   |  |
|  |  |  |  |  | Plxnc1   |  |
|  |  |  |  |  | Pmepa1   |  |
|  |  |  |  |  | Pmp22    |  |
|  |  |  |  |  | Polr3e   |  |
|  |  |  |  |  | Pon2     |  |
|  |  |  |  |  | Postn    |  |
|  |  |  |  |  | Ppap2b   |  |
|  |  |  |  |  | Ppap2c   |  |
|  |  |  |  |  | Ppapdc1b |  |
|  |  |  |  |  | Ppia     |  |
|  |  |  |  |  | Ppib     |  |
|  |  |  |  |  | Ppm1e    |  |
|  |  |  |  |  | Pqlc3    |  |
|  |  |  |  |  | Praf2    |  |
|  |  |  |  |  | Prdx4    |  |
|  |  |  |  |  | Prelid1  |  |
|  |  |  |  |  | Prelp    |  |
|  |  |  |  |  | Prg4     |  |
|  |  |  |  |  | Prkcb    |  |
|  |  |  |  |  | Prkcd    |  |
|  |  |  |  |  | Prkd3    |  |
|  |  |  |  |  | Pros1    |  |
|  |  |  |  |  | Prr13    |  |
|  |  |  |  |  | Prrx2    |  |
|  |  |  |  |  | Prss23   |  |
|  |  |  |  |  | Ptbp1    |  |
|  |  |  |  |  | Ptger4   |  |
|  |  |  |  |  | Ptgfrn   |  |
|  |  |  |  |  | Ptgis    |  |

|  |  |  |  |  |          |  |
|--|--|--|--|--|----------|--|
|  |  |  |  |  | Ptgs2    |  |
|  |  |  |  |  | Ptk2b    |  |
|  |  |  |  |  | Ptms     |  |
|  |  |  |  |  | Ptn      |  |
|  |  |  |  |  | Ptpn1    |  |
|  |  |  |  |  | Ptpn12   |  |
|  |  |  |  |  | Ptpn6    |  |
|  |  |  |  |  | Ptprc    |  |
|  |  |  |  |  | Ptprf    |  |
|  |  |  |  |  | Ptprij   |  |
|  |  |  |  |  | Pvrl3    |  |
|  |  |  |  |  | Pvt1     |  |
|  |  |  |  |  | Qpct     |  |
|  |  |  |  |  | Qsox1    |  |
|  |  |  |  |  | Rab23    |  |
|  |  |  |  |  | Rab31    |  |
|  |  |  |  |  | Rab3d    |  |
|  |  |  |  |  | Rab3il1  |  |
|  |  |  |  |  | Rab3ip   |  |
|  |  |  |  |  | Rab4b    |  |
|  |  |  |  |  | Rab711   |  |
|  |  |  |  |  | Rab8a    |  |
|  |  |  |  |  | Rab8b    |  |
|  |  |  |  |  | Rabgap11 |  |
|  |  |  |  |  | Rac2     |  |
|  |  |  |  |  | Rad5111  |  |
|  |  |  |  |  | Rai14    |  |
|  |  |  |  |  | Rangap1  |  |
|  |  |  |  |  | Rap1b    |  |
|  |  |  |  |  | Rarres2  |  |
|  |  |  |  |  | Rasa3    |  |
|  |  |  |  |  | Rassf2   |  |
|  |  |  |  |  | Rbl1     |  |
|  |  |  |  |  | Rbm7     |  |
|  |  |  |  |  | Rbms3    |  |
|  |  |  |  |  | Rbp1     |  |
|  |  |  |  |  | Rbpj     |  |
|  |  |  |  |  | Rcan1    |  |
|  |  |  |  |  | Rcn3     |  |
|  |  |  |  |  | Reck     |  |
|  |  |  |  |  | Renbp    |  |
|  |  |  |  |  | Rexo2    |  |
|  |  |  |  |  | Rhog     |  |
|  |  |  |  |  | Rhoj     |  |
|  |  |  |  |  | Rhou     |  |
|  |  |  |  |  | Rnase1   |  |
|  |  |  |  |  | Rnf141   |  |
|  |  |  |  |  | Rnf145   |  |
|  |  |  |  |  | Rnf19b   |  |
|  |  |  |  |  | Rnf213   |  |
|  |  |  |  |  | Rnh1     |  |
|  |  |  |  |  | Robo1    |  |
|  |  |  |  |  | Rock1    |  |
|  |  |  |  |  | Rpl23a   |  |
|  |  |  |  |  | Rpl3     |  |
|  |  |  |  |  | Rpn2     |  |
|  |  |  |  |  | Rps6ka3  |  |
|  |  |  |  |  | Rras     |  |
|  |  |  |  |  | Rrbp1    |  |
|  |  |  |  |  | Rrm1     |  |
|  |  |  |  |  | Rtn4     |  |
|  |  |  |  |  | Runx1    |  |
|  |  |  |  |  | Rusc2    |  |
|  |  |  |  |  | S100a10  |  |
|  |  |  |  |  | S100a11  |  |
|  |  |  |  |  | S100a6   |  |
|  |  |  |  |  | Sat1     |  |
|  |  |  |  |  | Sbno2    |  |
|  |  |  |  |  | Sc4mol   |  |



|  |  |  |  |  |           |  |
|--|--|--|--|--|-----------|--|
|  |  |  |  |  | Scara3    |  |
|  |  |  |  |  | Scd1      |  |
|  |  |  |  |  | Scn1b     |  |
|  |  |  |  |  | Scn7a     |  |
|  |  |  |  |  | Scpep1    |  |
|  |  |  |  |  | Scrn1     |  |
|  |  |  |  |  | Sdc2      |  |
|  |  |  |  |  | Sdc3      |  |
|  |  |  |  |  | Sdf211    |  |
|  |  |  |  |  | Sec11c    |  |
|  |  |  |  |  | Sec16b    |  |
|  |  |  |  |  | Sec23b    |  |
|  |  |  |  |  | Sec61a1   |  |
|  |  |  |  |  | Sel11     |  |
|  |  |  |  |  | Selp      |  |
|  |  |  |  |  | Selplg    |  |
|  |  |  |  |  | Sema3c    |  |
|  |  |  |  |  | Senp2     |  |
|  |  |  |  |  | Sepn1     |  |
|  |  |  |  |  | Sepp1     |  |
|  |  |  |  |  | Serinc2   |  |
|  |  |  |  |  | Serp1     |  |
|  |  |  |  |  | Serpina3h |  |
|  |  |  |  |  | Serpina3n |  |
|  |  |  |  |  | Serpinb1a |  |
|  |  |  |  |  | Serpine1  |  |
|  |  |  |  |  | Serpine2  |  |
|  |  |  |  |  | Serpinf1  |  |
|  |  |  |  |  | Serping1  |  |
|  |  |  |  |  | Sertad4   |  |
|  |  |  |  |  | Sfpi1     |  |
|  |  |  |  |  | Sfrp1     |  |
|  |  |  |  |  | Sfrp2     |  |
|  |  |  |  |  | Sfxn3     |  |
|  |  |  |  |  | Sgce      |  |
|  |  |  |  |  | Sgms2     |  |
|  |  |  |  |  | Sgp11     |  |
|  |  |  |  |  | Sh3bgr1   |  |
|  |  |  |  |  | Sh3bgr13  |  |
|  |  |  |  |  | Sh3bp2    |  |
|  |  |  |  |  | Sh3d19    |  |
|  |  |  |  |  | Sh3pxd2b  |  |
|  |  |  |  |  | Sh3rf3    |  |
|  |  |  |  |  | Shisa4    |  |
|  |  |  |  |  | Shisa5    |  |
|  |  |  |  |  | Shroom3   |  |
|  |  |  |  |  | Siglec1   |  |
|  |  |  |  |  | Siglece   |  |
|  |  |  |  |  | Sigmar1   |  |
|  |  |  |  |  | Sirpa     |  |
|  |  |  |  |  | Skap2     |  |
|  |  |  |  |  | Ski       |  |
|  |  |  |  |  | Skil      |  |
|  |  |  |  |  | Sla       |  |
|  |  |  |  |  | Slc11a1   |  |
|  |  |  |  |  | Slc15a3   |  |
|  |  |  |  |  | Slc1a5    |  |
|  |  |  |  |  | Slc22a4   |  |
|  |  |  |  |  | Slc25a24  |  |
|  |  |  |  |  | Slc25a45  |  |
|  |  |  |  |  | Slc29a3   |  |
|  |  |  |  |  | Slc2a1    |  |
|  |  |  |  |  | Slc30a4   |  |
|  |  |  |  |  | Slc35b4   |  |
|  |  |  |  |  | Slc37a2   |  |
|  |  |  |  |  | Slc38a1   |  |
|  |  |  |  |  | Slc39a1   |  |
|  |  |  |  |  | Slc39a6   |  |
|  |  |  |  |  | Slc3a2    |  |

|  |  |  |  |  |         |  |
|--|--|--|--|--|---------|--|
|  |  |  |  |  | Slc41a2 |  |
|  |  |  |  |  | Slc44a1 |  |
|  |  |  |  |  | Slc6a9  |  |
|  |  |  |  |  | Slc7a11 |  |
|  |  |  |  |  | Slc7a5  |  |
|  |  |  |  |  | Slc7a7  |  |
|  |  |  |  |  | Slc7a8  |  |
|  |  |  |  |  | Slc9a3  |  |
|  |  |  |  |  | Slc9a7  |  |
|  |  |  |  |  | Slc9a9  |  |
|  |  |  |  |  | Slco2a1 |  |
|  |  |  |  |  | Slit2   |  |
|  |  |  |  |  | Slit3   |  |
|  |  |  |  |  | Smad1   |  |
|  |  |  |  |  | Smc2    |  |
|  |  |  |  |  | Smc4    |  |
|  |  |  |  |  | Snai1   |  |
|  |  |  |  |  | Sntb2   |  |
|  |  |  |  |  | Snx1    |  |
|  |  |  |  |  | Snx10   |  |
|  |  |  |  |  | Snx7    |  |
|  |  |  |  |  | Soat1   |  |
|  |  |  |  |  | Socs2   |  |
|  |  |  |  |  | Sod3    |  |
|  |  |  |  |  | Sox5    |  |
|  |  |  |  |  | Sp140   |  |
|  |  |  |  |  | Sparc   |  |
|  |  |  |  |  | Spata6  |  |
|  |  |  |  |  | Sprr1a  |  |
|  |  |  |  |  | Sptlc2  |  |
|  |  |  |  |  | Srd5a3  |  |
|  |  |  |  |  | Srpx    |  |
|  |  |  |  |  | Srpx2   |  |
|  |  |  |  |  | Srxn1   |  |
|  |  |  |  |  | Ssfa2   |  |
|  |  |  |  |  | Ssh3    |  |
|  |  |  |  |  | St6gal1 |  |
|  |  |  |  |  | Stab1   |  |
|  |  |  |  |  | Stim2   |  |
|  |  |  |  |  | Stk32b  |  |
|  |  |  |  |  | Stk38l  |  |
|  |  |  |  |  | Strn    |  |
|  |  |  |  |  | Stt3a   |  |
|  |  |  |  |  | Stx11   |  |
|  |  |  |  |  | Stx2    |  |
|  |  |  |  |  | Stxbp1  |  |
|  |  |  |  |  | Stxbp2  |  |
|  |  |  |  |  | Sulf1   |  |
|  |  |  |  |  | Sulf2   |  |
|  |  |  |  |  | Susd2   |  |
|  |  |  |  |  | Svep1   |  |
|  |  |  |  |  | Syk     |  |
|  |  |  |  |  | Synj1   |  |
|  |  |  |  |  | Synm    |  |
|  |  |  |  |  | Synpo   |  |
|  |  |  |  |  | Syt11   |  |
|  |  |  |  |  | Tagln2  |  |
|  |  |  |  |  | Tanc2   |  |
|  |  |  |  |  | Taok3   |  |
|  |  |  |  |  | Tapbp   |  |
|  |  |  |  |  | Tbc1d14 |  |
|  |  |  |  |  | Tbc1d19 |  |
|  |  |  |  |  | Tbc1d8b |  |
|  |  |  |  |  | Tbx15   |  |
|  |  |  |  |  | Tbx20   |  |
|  |  |  |  |  | Tbxas1  |  |
|  |  |  |  |  | Tcf12   |  |
|  |  |  |  |  | Tcf21   |  |
|  |  |  |  |  | Tcirl1  |  |

|  |  |  |  |  |          |  |
|--|--|--|--|--|----------|--|
|  |  |  |  |  | Tcn2     |  |
|  |  |  |  |  | Tctn2    |  |
|  |  |  |  |  | Tep1     |  |
|  |  |  |  |  | Tgfb2    |  |
|  |  |  |  |  | Tgfb3    |  |
|  |  |  |  |  | Tgfb1    |  |
|  |  |  |  |  | Tgibr1   |  |
|  |  |  |  |  | Tgibr2   |  |
|  |  |  |  |  | Tgif1    |  |
|  |  |  |  |  | Tgm2     |  |
|  |  |  |  |  | Thbs2    |  |
|  |  |  |  |  | Thbs3    |  |
|  |  |  |  |  | Thbs4    |  |
|  |  |  |  |  | Thsd7a   |  |
|  |  |  |  |  | Tiam1    |  |
|  |  |  |  |  | Tifab    |  |
|  |  |  |  |  | Timp1    |  |
|  |  |  |  |  | Timp2    |  |
|  |  |  |  |  | Tjp2     |  |
|  |  |  |  |  | Tle3     |  |
|  |  |  |  |  | Tlr2     |  |
|  |  |  |  |  | Tlr8     |  |
|  |  |  |  |  | Tm6sf1   |  |
|  |  |  |  |  | Tmbim1   |  |
|  |  |  |  |  | Tmed3    |  |
|  |  |  |  |  | Tmem100  |  |
|  |  |  |  |  | Tmem106a |  |
|  |  |  |  |  | Tmem119  |  |
|  |  |  |  |  | Tmem167  |  |
|  |  |  |  |  | Tmem173  |  |
|  |  |  |  |  | Tmem176a |  |
|  |  |  |  |  | Tmem176b |  |
|  |  |  |  |  | Tmem183a |  |
|  |  |  |  |  | Tmem184c |  |
|  |  |  |  |  | Tmem195  |  |
|  |  |  |  |  | Tmem2    |  |
|  |  |  |  |  | Tmem209  |  |
|  |  |  |  |  | Tmem39a  |  |
|  |  |  |  |  | Tmem43   |  |
|  |  |  |  |  | Tmem45a  |  |
|  |  |  |  |  | Tmem50a  |  |
|  |  |  |  |  | Tmem97   |  |
|  |  |  |  |  | Tmsb10   |  |
|  |  |  |  |  | Tnc      |  |
|  |  |  |  |  | Tnfaip6  |  |
|  |  |  |  |  | Tnfrsf1a |  |
|  |  |  |  |  | Tnfrsf1b |  |
|  |  |  |  |  | Tnip1    |  |
|  |  |  |  |  | Tns3     |  |
|  |  |  |  |  | Tnxb     |  |
|  |  |  |  |  | Tpcn2    |  |
|  |  |  |  |  | Tpd52    |  |
|  |  |  |  |  | Tpm3     |  |
|  |  |  |  |  | Tpm4     |  |
|  |  |  |  |  | Tpx2     |  |
|  |  |  |  |  | Tram1    |  |
|  |  |  |  |  | Tram2    |  |
|  |  |  |  |  | Trf      |  |
|  |  |  |  |  | Trim30   |  |
|  |  |  |  |  | Trim41   |  |
|  |  |  |  |  | Trim47   |  |
|  |  |  |  |  | Trps1    |  |
|  |  |  |  |  | Trpv2    |  |
|  |  |  |  |  | Trpv4    |  |
|  |  |  |  |  | Tspan17  |  |
|  |  |  |  |  | Tspan5   |  |
|  |  |  |  |  | Tspo     |  |
|  |  |  |  |  | Tsr1     |  |
|  |  |  |  |  | Tssc1    |  |

|  |  |  |  |  |         |  |
|--|--|--|--|--|---------|--|
|  |  |  |  |  | Ttc37   |  |
|  |  |  |  |  | Ttc8    |  |
|  |  |  |  |  | Ttl112  |  |
|  |  |  |  |  | Ttl7    |  |
|  |  |  |  |  | Tuba1a  |  |
|  |  |  |  |  | Tuba1b  |  |
|  |  |  |  |  | Tuba1c  |  |
|  |  |  |  |  | Tubb2a  |  |
|  |  |  |  |  | Tubb5   |  |
|  |  |  |  |  | Tubgcp4 |  |
|  |  |  |  |  | Twf1    |  |
|  |  |  |  |  | Txndc5  |  |
|  |  |  |  |  | Txnrd1  |  |
|  |  |  |  |  | Tyk2    |  |
|  |  |  |  |  | Tyrobp  |  |
|  |  |  |  |  | Uap1    |  |
|  |  |  |  |  | Uap111  |  |
|  |  |  |  |  | Ubxn4   |  |
|  |  |  |  |  | Uchl1   |  |
|  |  |  |  |  | Uck2    |  |
|  |  |  |  |  | Ucp2    |  |
|  |  |  |  |  | Ufm1    |  |
|  |  |  |  |  | Ufsp2   |  |
|  |  |  |  |  | Ugcgl2  |  |
|  |  |  |  |  | Ugdh    |  |
|  |  |  |  |  | Unc13b  |  |
|  |  |  |  |  | Unc93b1 |  |
|  |  |  |  |  | Uprt    |  |
|  |  |  |  |  | Uso1    |  |
|  |  |  |  |  | Usp16   |  |
|  |  |  |  |  | Ust     |  |
|  |  |  |  |  | Uvrag   |  |
|  |  |  |  |  | Vat1    |  |
|  |  |  |  |  | Vcam1   |  |
|  |  |  |  |  | Vcan    |  |
|  |  |  |  |  | Vgll2   |  |
|  |  |  |  |  | Vim     |  |
|  |  |  |  |  | Vit     |  |
|  |  |  |  |  | Vkorc1  |  |
|  |  |  |  |  | Vsig4   |  |
|  |  |  |  |  | Vwa5a   |  |
|  |  |  |  |  | Vwf     |  |
|  |  |  |  |  | Wdfy4   |  |
|  |  |  |  |  | Wdr19   |  |
|  |  |  |  |  | Wdr32   |  |
|  |  |  |  |  | Wdr44   |  |
|  |  |  |  |  | Wipf1   |  |
|  |  |  |  |  | Wisp2   |  |
|  |  |  |  |  | Xylt1   |  |
|  |  |  |  |  | Yipf5   |  |
|  |  |  |  |  | Ywhah   |  |
|  |  |  |  |  | Zc3hav1 |  |
|  |  |  |  |  | Zcchc7  |  |
|  |  |  |  |  | Zdhhc2  |  |
|  |  |  |  |  | Zdhhc20 |  |
|  |  |  |  |  | Zeb2    |  |
|  |  |  |  |  | Zfc3h1  |  |
|  |  |  |  |  | Zfp3612 |  |
|  |  |  |  |  | Zfp423  |  |
|  |  |  |  |  | Zfp521  |  |
|  |  |  |  |  | Zyx     |  |

| Down-regulated ARG X GLY comparison            |                                                |                                                |                                                |                                                |                                 |                                                            |
|------------------------------------------------|------------------------------------------------|------------------------------------------------|------------------------------------------------|------------------------------------------------|---------------------------------|------------------------------------------------------------|
| Uniquely Regulated ARG 3 months X GLY 3 months | Uniquely Regulated GLY 3 months X ARG 3 months | Commonly Regulated ARG 3 months X GLY 3 months | Uniquely Regulated ARG 6 months X GLY 6 months | Uniquely Regulated GLY 6 months X ARG 6 months | Commonly Regulate ARG 6 X GLY 6 | Commonly Regulated (Uniquely Regulated ARG 3 X GLY3) X GLY |

|          |            |          |          |           |          |          |
|----------|------------|----------|----------|-----------|----------|----------|
|          |            |          |          |           |          | 6        |
| Abat     | Acot2      | A2bp1    | Aars2    | Adam1b    | A2bp1    | Abca6    |
| Abca6    | Adam24     | Abcc1    | Abca3    | Adra1d    | Aadacl1  | Abcc8    |
| Abcc8    | Agxt2l2    | Abcd2    | Abcb4    | Aig1      | Aamp     | Acaa2    |
| Acaa2    | Akap11     | Abhd1    | Abcd1    | Ak3l1     | Aarsd1   | Acadv1   |
| Acad8    | Akr1c14    | Acadm    | Abhd11   | Alkbh5    | Aasdhppt | Acs11    |
| Acadv1   | Akr1c19    | Acata1   | Abhd5    | Alox12    | Abca12   | Acy3     |
| Acs11    | Aldh7a1    | Acot1    | Abhd6    | Alpk2     | Abcb10   | Adi1     |
| Acy3     | Aldh9a1    | Acsf2    | Abhd8    | Amz2      | Abcb8    | Akr1b3   |
| Adi1     | Ankrd10    | Acta1    | Ablim2   | Ankrd52   | Abcb9    | Alad     |
| Akr1b3   | Ankrd12    | Actr3b   | Abtb1    | Anxa11    | Abcb8    | Aldh4a1  |
| Alad     | Ankrd33b   | Adamts6  | Acad11   | Arfgef2   | Abcc8    | Aldh6a1  |
| Aldh4a1  | Arhgef9    | Adhfe1   | Acad8    | Arhgef10l | Abcc9    | Ankrd32  |
| Aldh6a1  | Atr        | Adk      | Acad9    | Arl2      | Abcd2    | Ano5     |
| Amph     | Bach2      | Adra1a   | Acadl    | Bag4      | Abcd3    | Arhgap20 |
| Angpt1   | Bcap29     | Agpat2   | Aco2     | Bche      | Abhd1    | Arhgap26 |
| Ankrd32  | Bmp4       | Agpat9   | Acot11   | Bcl2l12   | Abhd10   | Armc2    |
| Ano5     | Cacna1g    | Agtr1a   | Acot13   | Bicap     | Ablim1   | Armet1   |
| Apol10b  | Camta1     | Akap5    | Acox1    | Btc       | Acaa2    | Art1     |
| Aqp7     | Car3       | Aldh2    | Acs16    | Cav2      | Acacb    | As3mt    |
| Arhgap20 | Carf       | Ano4     | Adam11   | Cbwd1     | Acadm    | Asb10    |
| Arhgap26 | Cd1d1      | Aplp2    | Adipor2  | Ccni      | Acads    | Asb14    |
| Arl6ip6  | Cd274      | Arap2    | Adra1b   | Cox7b2    | Acadv1   | Asb15    |
| Armc2    | Cldn12     | Art3     | Aes      | Dcps      | Acad1    | Asb2     |
| Armet1   | Clpx       | Asb5     | Afg3l1   | Defb34    | Acot1    | Atg10    |
| Art1     | Cluap1     | Atf7ip   | Agl      | Dexi      | Acot2    | Atp1a2   |
| As3mt    | Cnksr3     | Atp8a1   | Agpat2   | Dok4      | Acot7    | Atpaf1   |
| Asap3    | D0H4S114   | B3gal2   | Agtpbp1  | Dot11     | Acp6     | Auh      |
| Asb10    | D2hgdh     | Bbs2     | Akt1s1   | EG215895  | Acsf2    | Cabc1    |
| Asb14    | Dcp1a      | Beat2    | Alas2    | EG384589  | Acsf3    | Cacna1s  |
| Asb15    | Def8       | Bekdha   | Aldh9a1  | EG546944  | Acs11    | Ccb12    |
| Asb2     | Dgke       | Bcl9     | Alkbh7   | EG668786  | Acsm5    | Celsr2   |
| Atg10    | Dnmt3a     | Cacna2d1 | Amy1     | Esrrb     | Acss1    | Clcn1    |
| Atm      | Dtd1       | Calcoco1 | Amy2a1   | F2rl3     | Actr3b   | Clpb     |
| Atp1a2   | Efnal      | Camk2d   | Amy2a5   | Fam46b    | Acy1     | Cpeb3    |
| Atpaf1   | Egr2       | Cand2    | Angpt1   | Fbrs      | Acy3     | Cpt2     |
| Auh      | Ehmt1      | Capn3    | Angptl3  | Frmd6     | Acyp2    | Crat     |
| B3gnt3   | Eml5       | Casq1    | Ank      | Fzr1      | Adamts3  | Cyfp2    |
| Bat2l    | Ercc4      | Ccdc21   | Ank2     | Gfra4     | Adamts7  | Daam1    |
| Bcl7a    | Esrrb      | Cdh13    | Ankrd9   | Gjb3      | Adck1    | Dbt      |
| Bhlhb9   | Etv3       | Cdk11    | Ano4     | Glud1     | Adecy6   | Decr1    |
| Bhlhe41  | Fam116b    | Cecr2    | Ap4s1    | Gm428     | Adhfe1   | Dgat2    |
| Cabc1    | Fam178a    | Cenpp    | Apoo-ps  | Gm949     | Adi1     | Dhrs7c   |
| Cacna1s  | Fam69a     | Ces3     | App12    | Gmfg      | Adk      | Dnajc28  |
| Ccb12    | Fap        | Chmp4c   | Aqp7     | Gpr84     | Adprhl1  | Echs1    |
| Ccdc28a  | Fbx122     | Cirbp    | Arfgap2  | Gsdmc2    | Adra1a   | Egf      |
| Ccdc69   | Fkbp3      | Clcn3    | Arfgef1  | Gzmc      | Adsl     | Erbp4    |
| Cd300e   | Fnip2      | Colq     | Arfrp1   | Gzmf      | Agpat3   | Etfb     |
| Cd59a    | Frmd6      | Comt1    | Arhgef9  | Higd1a    | Agpat9   | Fabp3    |
| Cdc42ep2 | Gart       | Coro6    | Arl5b    | Hsd17b11  | Agtr1a   | Fah      |
| Cdc42ep3 | Gas5       | Crot     | Asb12    | Igh       | Aifm1    | Fbxo21   |
| Celsr1   | Gipc2      | Cry2     | Atl2     | Ikbkap    | Ak1      | Fkbp4    |
| Celsr2   | Gm428      | Cutc     | Atp5c1   | Il11ra1   | Akap1    | Galm     |
| Clasp1   | Gm826      | Cxadr    | Atp5d    | Il28b     | Akr1b3   | Gbas     |
| Clcn1    | Gpr112     | Dach1    | Atp5g3   | Insig1    | Akt2     | Gca      |
| Clpb     | Gtlf3a     | Dbp      | Atp5h    | Isoc2b    | Alad     | Gcdh     |
| Cmb1     | Gypc       | Dei      | Atp5j2   | Kcnj4     | Alas1    | Gm129    |
| Cpeb3    | Haus2      | Dcpp3    | Atpaf2   | Klhl34    | Aldh2    | Grc10    |
| Cpt2     | Hbegf      | Ddah1    | Atpgd1   | Krba1     | Aldh4a1  | Gstk1    |
| Crat     | Hcn4       | Ddo      | Aurkaip1 | Larp7     | Aldh5a1  | H2-Ke2   |
| Cyb5d2   | Hes1       | Dennd4b  | Avpr1a   | Leng9     | Aldh6a1  | H2afv    |
| Cyfp2    | Hist2h2aa1 | Dhrs4    | Bach2    | Lmod2     | Aldob    | Hadha    |
| Daam1    | Hmgb2      | Dhtkd1   | Bag3     | Lrba      | Amacr    | Hdac4    |
| Dbt      | Hnrnp3     | Dip2b    | Bak1     | Lrre48    | Amd1     | Hopx     |
| Decr1    | Hs3st5     | Dip2c    | Bbs2     | Lrre55    | Amtn     | Hrc      |
| Dgat2    | Hspb3      | Doc2g    | Bckdk    | Lsmd1     | Anapc13  | Hsd17b10 |
| Dhrs7c   | Htr1b      | Dusp16   | Bcl2111  | Lynx1     | Ankrd32  | Il10rb   |
| Dmpk     | Ift81      | Dusp27   | Bcl6b    | Mad2l1bp  | Ankrd33b | Il15     |
| Dnajc28  | Ing5       | Ech1     | Bcl7a    | Mcpt1     | Anks1    | Inpp5e   |

|          |          |         |         |             |          |          |
|----------|----------|---------|---------|-------------|----------|----------|
| Echs1    | Ino80    | Echdc2  | Bhlhb9  | Metrn       | Ano5     | Irx4     |
| Efcab4b  | Insig1   | Echdc3  | Bloc1s1 | Mmd         | Apbb1    | Kcnv2    |
| Egf      | Irx3     | Eepd1   | Bola3   | Mpnd        | Apex2    | Klk1b26  |
| Eml2     | Itga9    | Eif3m   | Brp44   | Mrpl54      | Apip     | Lars2    |
| Epb4.115 | Jam3     | Eif4e   | Brp44l  | Mrps12      | Arhgap20 | Ldhd     |
| Erb4     | Kbtbd7   | Entpd6  | C1qbp   | Mrps16      | Arhgap26 | Llg12    |
| Etfb     | Klf12    | Ephb3   | Cacna1c | Ms4a2       | Arhgef15 | Lphn2    |
| Evl1     | Klf9     | Ephx2   | Cacna1g | Myog        | Arl3     | Lrtm1    |
| Extl2    | Klra10   | Erc1    | Cacnb2  | Ndufa11     | Armc2    | M6prbp1  |
| Fabp3    | Ky       | Fam65b  | Camk2a  | Nme3        | Armet1   | Macrodl  |
| Fah      | Larp4    | Fblim1  | Car4    | Nmur1       | Art1     | Magix    |
| Fam100a  | Larp7    | Fbp2    | Card6   | Notch1      | Art3     | Me3      |
| Fam113b  | Lepr     | Fgf1    | Ccbl1   | Nr1d1       | As3mt    | Mgmt     |
| Fam78a   | Lsm3     | Fgf16   | Ccdc47  | Palm2-akap2 | Asb10    | Mlxipl   |
| Fanc1    | Mier3    | Frem2   | Ccdc69  | Pitpnm2     | Asb11    | Mrgprh   |
| Fbxo21   | Mmd      | Fyco1   | Ccdc90a | Prdm11      | Asb14    | Mrps25   |
| Fbxo3    | Mov10    | Gab1    | Ccl24   | Pr17a2      | Asb15    | Mtap7    |
| Fgf13    | Mrpl52   | Gcnt1   | Ccnh    | Pr17b1      | Asb18    | Myadml2  |
| Fgf9     | Msto1    | Gcom1   | Ccrl2   | Prune       | Asb2     | Myl3     |
| Fkbp4    | Mthfd1   | Gdap10  | Cd1d2   | Psors1c2    | Asb5     | Mylk4    |
| Foxo3    | Mttp     | Ggct    | Cd36    | Ptpn4       | Asrgl1   | Myo18a   |
| Frag1    | Myef2    | Gm889   | Cdc3711 | Pycl1       | Atg10    | N6amt2   |
| Frm48    | Necab1   | Gmpr    | Cdc40   | Rabac1      | Atg2a    | Neo1     |
| Fzd8     | Nes      | Gnb3    | Cdh23   | RbmX        | Atg4d    | Oma1     |
| Galm     | Nln      | Gpd11   | Cdkn1c  | Rbx1        | Atp1a2   | Osbp2    |
| Gbas     | Nod1     | Gramd1b | Cds1    | Rcor2       | Atp5e    | P2ry1    |
| Gbp3     | Nr1d2    | Grit    | Celsr1  | Rcsd1       | Atp5f1   | Pacsin3  |
| Gca      | Nr3c1    | Guk1    | Cep70   | Rnu2        | Atp5g1   | Pank1    |
| Gcdh     | Odc1     | Hadh    | Chac2   | Rrp9        | Atp5g2   | Pcca     |
| Gm129    | Pcdh7    | Herc3   | Chchd3  | Rsad1       | Atp5k    | Pdk2     |
| Gpatch8  | Pdhh     | Hlf     | Chchd7  | Scube1      | Atp5l    | Pfkfb1   |
| Grcc10   | Pdrg1    | Hmcn1   | Chkb    | Sephs2      | Atp5o    | Phf7     |
| Gsta4    | Pex7     | Hmgn2   | Cidea   | Sertad1     | Atp5sl   | Pink1    |
| Gstk1    | Pick1    | Hrasl3  | Clpx    | Shmt2       | Atp6v1g1 | Pitpnc1  |
| Gstz1    | Plcl2    | Hsdl2   | Clybl   | Sil1        | Atp8a1   | Pla2g4e  |
| Gzme     | Plscr2   | Idh2    | Cmb1    | Snord32a    | Atpaf1   | Plxnb1   |
| H2-Ke2   | Pnmal2   | Igsf1   | Cmya5   | Sox6        | Auh      | Pm20d1   |
| H2afv    | Prepl    | Il13ra1 | Cnga3   | Spe24       | Bag1     | Polq     |
| Hadha    | Prpf4    | Immp2l  | Cnksr3  | Speer4a     | Bcam     | Ppapdc3  |
| Hcfc1r1  | Prpsap2  | Intu    | Cnot10  | Speg        | Bcap29   | Ppfibp2  |
| Hdac4    | Rapgef5  | Ipo13   | Cog5    | St6galnac3  | Bcat2    | Ppm1k    |
| Helz     | Rasd2    | Itga7   | Cops6   | Stfa2l1     | Bckdha   | Prdx5    |
| Hibadh   | Rbak     | Itgb6   | Coq3    | Tacstd2     | Bckdhh   | Prkcq    |
| Hmgb1    | Rev1     | Ivd     | Coq4    | Taf4b       | Bcl11a   | Prox1    |
| Hopx     | Rfc1     | Jarid2  | Coq5    | Tbl3        | Bcl11b   | Ptchd3   |
| Hrc      | Rps10    | Jph1    | Cox15   | Tecpr1      | Bcl2l13  | Pxmp4    |
| Hsd17b10 | Rrp9     | Kcnip2  | Cox4i1  | Tgif2       | Bcl9     | Rbm20    |
| Il10rb   | Rtf1     | Kcnj11  | Cox5b   | Thoc6       | Bdh1     | Retsat   |
| Il15     | Safb     | Kdm6a   | Cox7a2  | Thoc7       | Bend5    | Ric8b    |
| Inpp5e   | Scaper   | Klhdc1  | Crip2   | Thra        | Bex1     | Rnf34    |
| Iqgap2   | Scnm1    | Krt222  | Cryba4  | Thtpa       | Bsg      | Rps6ka2  |
| Irf9     | Sep2     | Lama5   | Crybb1  | Tmco7       | Btnl9    | Rtn2     |
| Irx4     | Senp7    | Lbh     | Cs      | Tmem109     | Bzw2     | Sesn1    |
| Jup      | Sfrs14   | Lclat1  | Ctage5  | Tmem161b    | Cabc1    | Sgol2    |
| Kbtbd3   | Sfrs3    | Lgals4  | Cul5    | Tmem70      | Cacna1s  | Sh2d4a   |
| Kcnb1    | Sft2d3   | Lgi1    | Cutc    | Tra2a       | Cadm4    | Sirt5    |
| Kcnd2    | Six4     | Limch1  | Cux2    | Trmt1       | Calcoco1 | Slc20a2  |
| Kcnf1    | Slc25a28 | Lmo2    | Cxcr7   | Trpc1       | Camta1   | Slc22a5  |
| Kcnv2    | Slc25a33 | Lonrf1  | Cxx1b   | Tsc22d4     | Cand2    | Slc25a13 |
| Kctd9    | Slc35a4  | Lrrc39  | Cycs    | Ugt2b38     | Capn3    | Slc25a20 |
| Kif26b   | Smndc1   | Lrrc4b  | Cyp2u1  | Ugt2b5      | Car14    | Slc25a42 |
| Klhdc8a  | Smoc2    | Lrrc55  | Cyth1   | Usp20       | Car8     | Slc41a1  |
| Klk1b26  | Snape1   | Lysmd4  | Cyrr1   | V1rh9       | Cars2    | Slc46a3  |
| Lars2    | Snapi1   | Lzic    | Dap3    | Vamp5       | Casq1    | Slc9a2   |
| Ldhd     | Snord53  | Mboat2  | Dars2   | Vmn2r33     | Casz1    | Sobp     |
| Llg12    | Snrpg    | Mccc1   | Dcbld1  | Vmn2r56     | Cbfa2t3  | Spca24   |
| Lphn2    | Sp110    | Mccc2   | Dctpp1  | Vmn2r74     | Cbr4     | Srp3     |
| Lrrc61   | Synpo21  | Med12l  | Ddx59   | Vps36       | Ccbl2    | Stom     |
| Lrtm1    | Taf1a    | Med4    | Dennd2c | Wdr5b       | Ccdc12   | Suc1g2   |

|          |         |            |           |         |             |         |
|----------|---------|------------|-----------|---------|-------------|---------|
| M6prbp1  | Tmem87a | Mef2a      | Dennd3    | Wscd1   | Ccdc21      | Tcap    |
| Macrodl  | Tmem93  | Meis2      | Dgcr6     | Zbtb37  | Ccdc44      | Tcea3   |
| Magi2    | Tra2b   | Mgst3      | Dhodh     | Zfp354b | Ccl11       | Tecpr1  |
| Magix    | Trdmt1  | Mitf       | Diablo    | Zfp827  | Ccnk        | Thrsp   |
| Me3      | Trib1   | Mlf1       | Dixdc1    |         | Cdh4        | Tmc7    |
| Med16    | Trim16  | Mut        | Dkc1      |         | Cdk5rap1    | Tmem182 |
| Mef2c    | Trmt12  | Myh7b      | Dlat      |         | Cdk11       | Tmem82  |
| Meig1    | Txnip   | Myo5b      | Dld       |         | Cdk15       | Trim63  |
| Mgmt     | Ube2o   | Myo9a      | Dmxl2     |         | Cecr2       | Trpm4   |
| Mid1ip1  | Usp10   | Myom2      | Dnaje16   |         | Cecr5       | Tuba4a  |
| Mlxipl   | Usp21   | N6amt1     | Dnaje19   |         | Celsr2      | Ulk1    |
| Mrgprh   | Usp22   | Nampt      | Dnalc4    |         | Cenpv       | Vamp5   |
| Mrsps25  | Wdfy1   | Nnt        | Dpyd      |         | Cep68       | Wnk4    |
| Mtap7    | Wdr53   | Nqo1       | Dtnbp1    |         | Ces3        | Xk      |
| Mterfd2  | Wipi1   | Nr3c2      | Dus4l     |         | Chchd2      | Yipf7   |
| Mtss1    | X99384  | Nrap       | Dynll2    |         | Chd7        |         |
| Myadml2  | Xlr     | Nt5c3      | Dyrk1b    |         | Chpt1       |         |
| Myl3     | Yeats2  | Ogdhl      | Eef1a2    |         | Churc1      |         |
| Mylk4    | Zbtb10  | Oplah      | Efcab2    |         | Ciao1       |         |
| Myo18a   | Zfand1  | Pah        | Efemp1    |         | Cirbp       |         |
| N6amt2   | Zfp1    | Paqr9      | Egln1     |         | Cisd1       |         |
| Ndufa3   | Zfp46   | Pccb       | Egr1      |         | Ckm         |         |
| Neo1     | Zfp509  | Pctk3      | Eif4e     |         | Ckmt2       |         |
| Nfe2l3   | Zfp518  | Pde11a     | Elf2      |         | Clcn1       |         |
| Nfyc     | Zfp799  | Pde7a      | Elmod3    |         | Clcn3       |         |
| Nmnat3   | Zfp93   | Per3       | Eno3      |         | Clpb        |         |
| Npr2     | Zxdc    | Pet112l    | Entpd4    |         | Clpp        |         |
| Nudt16l1 | Zyg11b  | Pik3c2b    | Epb4.1    |         | Cmtm8       |         |
| Nudt2    |         | Pik3ip1    | Epb4.114a |         | Cobl1       |         |
| Nup54    |         | Pkia       | Epb4.115  |         | Cog6        |         |
| Oat      |         | Pnet-ps    | Epn1      |         | Coq10a      |         |
| Ociad2   |         | Ppif       | Epn3      |         | Coq2        |         |
| Oma1     |         | Ppml d     | Eps1511   |         | Coq6        |         |
| Osbp2    |         | Ppmlj      | Etfa      |         | Coq7        |         |
| Otud1    |         | Ppm2c      | Etv3      |         | Coq9        |         |
| P2ry1    |         | Ppp1r14c   | F11r      |         | Coro6       |         |
| Pacsin3  |         | Ptpn3      | Fahd1     |         | Cox10       |         |
| Pak6     |         | Ptpn4      | Fahd2a    |         | Cox5a       |         |
| Pank1    |         | Ptpm       | Fam113b   |         | Cox6a2      |         |
| Parp8    |         | Pts        | Fam158a   |         | Cox6b1      |         |
| Pcca     |         | Pxmp2      | Fam174b   |         | Cox6c       |         |
| Pdk2     |         | Rbbp6      | Fam78a    |         | Cox7a1      |         |
| Pfkfb1   |         | Rcor2      | Fam82b    |         | Cox7b       |         |
| Pfkm     |         | Rhd        | Fastkd2   |         | Cox7c       |         |
| Phf7     |         | Rhobtb2    | Fblim1    |         | Cox8b       |         |
| Pink1    |         | Rnf207     | Fbxo3     |         | Cpeb2       |         |
| Pisd     |         | Rpp40      | Fbxw7     |         | Cpeb3       |         |
| Pitpnc1  |         | Rrm2b      | Fdx1      |         | Cpox        |         |
| Pla2g4e  |         | Scd4       | Fem1a     |         | Cpt1b       |         |
| Plekha6  |         | Scgb1c1    | Ferd3l    |         | Cpt2        |         |
| Plxnb1   |         | Scn4a      | Fgf13     |         | Crat        |         |
| Pm20d1   |         | Sema4d     | Fgf9      |         | Creg1       |         |
| Polq     |         | Sh3rf2     | Fgfr1op   |         | Crhr2       |         |
| Polr2e   |         | Shmt2      | Fig4      |         | Crygb       |         |
| Ppapdc3  |         | Sipa1l2    | Filip1l   |         | Csdc2       |         |
| Ppfbp2   |         | Slc25a34   | Flad1     |         | Csnk2a1-rs2 |         |
| Ppm1k    |         | Slc25a38   | Fnipl     |         | Cth         |         |
| Ppp1r3b  |         | Slc27a1    | Foxn3     |         | Ctla4       |         |
| Prdx5    |         | Slc36a2    | Foxo3     |         | Ctnna3      |         |
| Prkcq    |         | Slc44a2    | Foxred1   |         | Cxadr       |         |
| Prox1    |         | Sntb1      | Frap1     |         | Cyc1        |         |
| Prss3    |         | Sp4        | Fsd2      |         | Cyfp2       |         |
| Psmc1    |         | St6galnac3 | Fstl4     |         | Cyp2b10     |         |
| Ptcd3    |         | Synj2      | Fto       |         | Cyp2b9      |         |
| Ptchd3   |         | Tef        | Gabpa     |         | Cyp4b1      |         |
| Pxmp4    |         | Tmem205    | Gabbr2    |         | Daam1       |         |
| Pygb     |         | Tmem50b    | Gata6     |         | Dbt         |         |
| Qsox2    |         | Tmod4      | Gcnt1     |         | Dci         |         |
| Rad54l2  |         | Trim54     | Gdpd1     |         | Dcun1d2     |         |

|          |  |        |          |  |          |  |
|----------|--|--------|----------|--|----------|--|
| Rad9b    |  | Ttc39b | Gfod1    |  | Ddo      |  |
| Rassf9   |  | Txnrd3 | Ghr      |  | Ddt      |  |
| Rbl2     |  | Vldlr  | Gja3     |  | Deb1     |  |
| Rbm20    |  | Wdr36  | Glrx5    |  | Decr1    |  |
| Retsat   |  | Xpo4   | Gm166    |  | Def8     |  |
| Rfwd3    |  | Zfp30  | Gml      |  | Dennd4b  |  |
| Ric8b    |  | Zswim7 | Gmnn     |  | Dgat2    |  |
| Rnase9   |  |        | Gnas     |  | Dgcr2    |  |
| Rnf34    |  |        | Gnmt     |  | Dguok    |  |
| Rorc     |  |        | Gpam     |  | Dhrs11   |  |
| Rps6ka2  |  |        | Gpd11    |  | Dhrs4    |  |
| Rtn2     |  |        | Gpn3     |  | Dhrs7c   |  |
| Runx1t1  |  |        | Gpr116   |  | Dhtkd1   |  |
| Sesn1    |  |        | Gpr155   |  | Dip2c    |  |
| Sgol2    |  |        | Gpr173   |  | Dll4     |  |
| Sh2d4a   |  |        | Gpsn2    |  | Dlst     |  |
| Sirt5    |  |        | Grm1     |  | Dnaja3   |  |
| Slc20a2  |  |        | Gstz1    |  | Dnajc15  |  |
| Slc22a5  |  |        | Gtf2i    |  | Dnajc28  |  |
| Slc25a13 |  |        | Gtpbbp2  |  | Dnajc30  |  |
| Slc25a20 |  |        | Gys1     |  | Dnmt3a   |  |
| Slc25a42 |  |        | Gzf1     |  | Doc2g    |  |
| Slc40a1  |  |        | Hand2    |  | Dpf3     |  |
| Slc41a1  |  |        | Hars2    |  | Dpysl4   |  |
| Slc46a3  |  |        | Hbb-b1   |  | Drap1    |  |
| Slc47a1  |  |        | Hccs     |  | Dsc2     |  |
| Slc9a10  |  |        | Hdhd2    |  | Dsg1c    |  |
| Slc9a2   |  |        | Helz     |  | Dsg2     |  |
| Snora34  |  |        | Hibadh   |  | Dtd1     |  |
| Sobp     |  |        | Hibch    |  | Dtna     |  |
| Sox4     |  |        | Hk2      |  | Dtwd2    |  |
| Spc24    |  |        | Hmbs     |  | Dub1     |  |
| Srpk3    |  |        | Hmgb3    |  | Dusp10   |  |
| Stom     |  |        | Homer1   |  | Dusp23   |  |
| Suclg2   |  |        | Hsd17b4  |  | Dusp7    |  |
| Taf7     |  |        | Hspd1    |  | Dusp8    |  |
| Tanc1    |  |        | Hus1     |  | Dut      |  |
| Tcap     |  |        | Idh1     |  | Ech1     |  |
| Tcea3    |  |        | Idh3a    |  | Echdc2   |  |
| Tecpr1   |  |        | Idh3b    |  | Echdc3   |  |
| Tet1     |  |        | Idh3g    |  | Echs1    |  |
| Tgtp     |  |        | Il15ra   |  | Ecsit    |  |
| Thrsp    |  |        | Immt     |  | Eef1d    |  |
| Tjp1     |  |        | Iqgap2   |  | Eepd1    |  |
| Tmc7     |  |        | Iqsec1   |  | Efna5    |  |
| Tmem141  |  |        | Iqwd1    |  | Efnb3    |  |
| Tmem182  |  |        | Irx3     |  | Egf      |  |
| Tmem196  |  |        | Iscu     |  | Ehhadh   |  |
| Tmem82   |  |        | Isyna1   |  | Eif2b4   |  |
| Trim13   |  |        | Itpr2    |  | Endog    |  |
| Trim63   |  |        | Ivns1abp |  | Entpd6   |  |
| Trpm4    |  |        | Jam2     |  | Epha4    |  |
| Tspan13  |  |        | Jarid2   |  | Ephb3    |  |
| Tuba4a   |  |        | Jhdm1d   |  | Ephx2    |  |
| Ulk1     |  |        | Jmy      |  | Epm2aip1 |  |
| Unc45b   |  |        | Josd1    |  | Eral1    |  |
| Usp54    |  |        | Kbtbd3   |  | Erbp3    |  |
| V1rc25   |  |        | Kcnd2    |  | Erbp4    |  |
| Vamp5    |  |        | Kcnj2    |  | Erc1     |  |
| Wdr42a   |  |        | Kcnj5    |  | Esrra    |  |
| Wif1     |  |        | Kcnq1    |  | Esrrg    |  |
| Wnk4     |  |        | Kctd9    |  | Etfb     |  |
| Xk       |  |        | Khdrbs3  |  | Etfhdh   |  |
| Yipf7    |  |        | Khk      |  | Ethe1    |  |
| Zcche17  |  |        | Kif16b   |  | Etl4     |  |
| Zkscan3  |  |        | Kif1b    |  | Extl1    |  |
|          |  |        | Kitl     |  | Fabp3    |  |
|          |  |        | Klf15    |  | Fah      |  |
|          |  |        | Klhdc3   |  | Fam116b  |  |



|  |  |  |          |  |          |  |
|--|--|--|----------|--|----------|--|
|  |  |  | Klhdc8a  |  | Fam160a1 |  |
|  |  |  | Klh124   |  | Fam46c   |  |
|  |  |  | Klh138   |  | Fam59a   |  |
|  |  |  | Klh19    |  | Fam65b   |  |
|  |  |  | Kpna2    |  | Fam73a   |  |
|  |  |  | Kptn     |  | Fam73b   |  |
|  |  |  | Kti12    |  | Farp2    |  |
|  |  |  | Lancl3   |  | Fars2    |  |
|  |  |  | Leng1    |  | Fastk    |  |
|  |  |  | Letm1    |  | Fastkd1  |  |
|  |  |  | Lifr     |  | Fbp2     |  |
|  |  |  | Lims1    |  | Fbx122   |  |
|  |  |  | Lin52    |  | Fbxo21   |  |
|  |  |  | Lin9     |  | Fbxo25   |  |
|  |  |  | Lipe     |  | Fbxo31   |  |
|  |  |  | Lman2l   |  | Fdft1    |  |
|  |  |  | Lmbr1    |  | Fech     |  |
|  |  |  | Lmtk2    |  | Fgd4     |  |
|  |  |  | Lonrf1   |  | Fgf16    |  |
|  |  |  | Lrg1     |  | Fh1      |  |
|  |  |  | Ltbp1    |  | Fhl2     |  |
|  |  |  | Ly75     |  | Fhod3    |  |
|  |  |  | Lym5     |  | Figl     |  |
|  |  |  | Maf1     |  | Fitm1    |  |
|  |  |  | Magi2    |  | Fitm2    |  |
|  |  |  | Map1lc3a |  | Fkbp3    |  |
|  |  |  | Map2k6   |  | Fkbp4    |  |
|  |  |  | Mat2b    |  | Fmc1     |  |
|  |  |  | Mavs     |  | Fn3k     |  |
|  |  |  | Mdh1     |  | Fndc5    |  |
|  |  |  | Mdh2     |  | Foxo4    |  |
|  |  |  | Mecr     |  | Frem2    |  |
|  |  |  | Med16    |  | Fry      |  |
|  |  |  | Mef2a    |  | Fv1      |  |
|  |  |  | Mett11d1 |  | Fyco1    |  |
|  |  |  | Mfn1     |  | Gab1     |  |
|  |  |  | Mfsd8    |  | Gal3st3  |  |
|  |  |  | Mgll     |  | Galm     |  |
|  |  |  | Mgrn1    |  | Galnt11  |  |
|  |  |  | Mid1ip1  |  | Galt     |  |
|  |  |  | Mkks     |  | Garnl4   |  |
|  |  |  | Mknk2    |  | Gba2     |  |
|  |  |  | Mmaa     |  | Gbas     |  |
|  |  |  | Mmachc   |  | Gca      |  |
|  |  |  | Mmgt1    |  | Gcat     |  |
|  |  |  | Mov10l1  |  | Gcdh     |  |
|  |  |  | Mpi      |  | Gck      |  |
|  |  |  | Mpv17    |  | Gcom1    |  |
|  |  |  | Mreg     |  | Gcsh     |  |
|  |  |  | Mrpl11   |  | Gdap10   |  |
|  |  |  | Mrpl14   |  | Gdpc5    |  |
|  |  |  | Mrpl18   |  | Gfm1     |  |
|  |  |  | Mrpl19   |  | Gfm2     |  |
|  |  |  | Mrpl2    |  | Ggnbp1   |  |
|  |  |  | Mrpl3    |  | Glo1     |  |
|  |  |  | Mrpl30   |  | Gm129    |  |
|  |  |  | Mrpl35   |  | Gm216    |  |
|  |  |  | Mrpl36   |  | Gm561    |  |
|  |  |  | Mrpl39   |  | Gm826    |  |
|  |  |  | Mrpl4    |  | Gm889    |  |
|  |  |  | Mrpl44   |  | Gmpr     |  |
|  |  |  | Mrpl47   |  | Gna12    |  |
|  |  |  | Mrpl50   |  | Gnb3     |  |
|  |  |  | Mrpl51   |  | Gnpat    |  |
|  |  |  | Mrpl55   |  | Got1     |  |
|  |  |  | Mrpl9    |  | Got2     |  |
|  |  |  | Mrps18c  |  | Gpbp111  |  |
|  |  |  | Mrps23   |  | Gpc1     |  |
|  |  |  | Mrps27   |  | Gpr157   |  |

|  |  |  |         |  |           |  |
|--|--|--|---------|--|-----------|--|
|  |  |  | Mrps33  |  | Gpr22     |  |
|  |  |  | Mrps36  |  | Gpt       |  |
|  |  |  | Msh2    |  | Gpt2      |  |
|  |  |  | Msh3    |  | Grb14     |  |
|  |  |  | Msrb2   |  | Grcc10    |  |
|  |  |  | Mtch2   |  | Grip2     |  |
|  |  |  | Mtfr1   |  | Grpel1    |  |
|  |  |  | Mtif3   |  | Gsk3a     |  |
|  |  |  | Mtl5    |  | Gstk1     |  |
|  |  |  | Mto1    |  | Gstm7     |  |
|  |  |  | Mtrf1   |  | Gstp1     |  |
|  |  |  | Mtrf11  |  | Gtf3c1    |  |
|  |  |  | Mtus1   |  | Gtpbp10   |  |
|  |  |  | Mtx2    |  | Gtpbp5    |  |
|  |  |  | Myh6    |  | H2-Ke2    |  |
|  |  |  | Myst1   |  | H2-Ke6    |  |
|  |  |  | N4bp2   |  | H2-T24    |  |
|  |  |  | Nap114  |  | H2afv     |  |
|  |  |  | Naprt1  |  | Hadh      |  |
|  |  |  | Nars2   |  | Hadha     |  |
|  |  |  | Nbn     |  | Hadhb     |  |
|  |  |  | Ndufa1  |  | Hcn2      |  |
|  |  |  | Ndufa10 |  | Hcn4      |  |
|  |  |  | Ndufa12 |  | Hdac11    |  |
|  |  |  | Ndufa3  |  | Hdac4     |  |
|  |  |  | Ndufa9  |  | Hdac5     |  |
|  |  |  | Ndufaf1 |  | Hdac9     |  |
|  |  |  | Ndufaf4 |  | Hemk1     |  |
|  |  |  | Ndufb2  |  | Herc3     |  |
|  |  |  | Ndufb6  |  | Herpud1   |  |
|  |  |  | Ndufc1  |  | Hfe2      |  |
|  |  |  | Ndufs1  |  | Hhat1     |  |
|  |  |  | Ndufs2  |  | Hint2     |  |
|  |  |  | Ndufs5  |  | Hisppd1   |  |
|  |  |  | Ndufs6  |  | Hlf       |  |
|  |  |  | Ndufs8  |  | Hmcn1     |  |
|  |  |  | Ndufv2  |  | Hmgcl     |  |
|  |  |  | Nfyc    |  | Hmgn2     |  |
|  |  |  | Nhsl1   |  | Hnmt      |  |
|  |  |  | Nipal3  |  | Homer2    |  |
|  |  |  | Nr0b2   |  | Hook1     |  |
|  |  |  | Nsun4   |  | Hopx      |  |
|  |  |  | Nudc    |  | Hrasls    |  |
|  |  |  | Nudt12  |  | Hrc       |  |
|  |  |  | Nudt3   |  | Hs3st5    |  |
|  |  |  | Oat     |  | Hsd11b1   |  |
|  |  |  | Oaz1    |  | Hsd17b10  |  |
|  |  |  | Ociad2  |  | Hsd12     |  |
|  |  |  | Ogdh    |  | Htra1     |  |
|  |  |  | Opal    |  | Idh2      |  |
|  |  |  | Osbp    |  | Ifngr2    |  |
|  |  |  | Osbpl6  |  | Ifrd2     |  |
|  |  |  | Oxa11   |  | Ift81     |  |
|  |  |  | Oxct1   |  | Igk-V21-2 |  |
|  |  |  | Oxnad1  |  | Il10rb    |  |
|  |  |  | Parl    |  | Il15      |  |
|  |  |  | Parp1   |  | Impa2     |  |
|  |  |  | Pcmdt2  |  | Inadl     |  |
|  |  |  | Pcp411  |  | Inpp5e    |  |
|  |  |  | Pdc5    |  | Insr      |  |
|  |  |  | Pde4a   |  | Intu      |  |
|  |  |  | Pde4c   |  | Ipo13     |  |
|  |  |  | Pde7a   |  | Irx4      |  |
|  |  |  | Pdhh    |  | Isca1     |  |
|  |  |  | Pdrg1   |  | Isoc1     |  |
|  |  |  | Pdss2   |  | Itga7     |  |
|  |  |  | Pecr    |  | Itgb1bp2  |  |
|  |  |  | Penk    |  | Itgb6     |  |
|  |  |  | Pfkfb2  |  | Itpkb     |  |

|  |  |  |          |  |         |  |
|--|--|--|----------|--|---------|--|
|  |  |  | Pfkm     |  | Ivd     |  |
|  |  |  | Pgf      |  | Jag2    |  |
|  |  |  | Phf2011  |  | Jmjd4   |  |
|  |  |  | Phospho1 |  | Jph1    |  |
|  |  |  | Phtf2    |  | Jph2    |  |
|  |  |  | Phyh     |  | Kbtbd4  |  |
|  |  |  | Phyhd1   |  | Kcnd3   |  |
|  |  |  | Pigy     |  | Kcng2   |  |
|  |  |  | Pik3r1   |  | Kcnh2   |  |
|  |  |  | Pim3     |  | Kcnip2  |  |
|  |  |  | Pkdrej   |  | Kcnj11  |  |
|  |  |  | Pkp4     |  | Kcnj12  |  |
|  |  |  | Pla2g5   |  | Kcnj3   |  |
|  |  |  | Plbd1    |  | Kcnk3   |  |
|  |  |  | Plekhf1  |  | Kcnn2   |  |
|  |  |  | Plxna2   |  | Kcv2    |  |
|  |  |  | Pmpcb    |  | Kdm6b   |  |
|  |  |  | Pnk      |  | Klf9    |  |
|  |  |  | Pnp      |  | Klhdc1  |  |
|  |  |  | Pnpt1    |  | Klhdc6  |  |
|  |  |  | Poln     |  | Klhl21  |  |
|  |  |  | Ppcs     |  | Klhl23  |  |
|  |  |  | Ppp1r14c |  | Klhl3   |  |
|  |  |  | Ppp1r3a  |  | Klhl30  |  |
|  |  |  | Ppp1r9a  |  | Klhl31  |  |
|  |  |  | Prdx3    |  | Klhl7   |  |
|  |  |  | Prei4    |  | Klk1b26 |  |
|  |  |  | Prickle1 |  | Klk1b9  |  |
|  |  |  | Prkaa2   |  | Klra10  |  |
|  |  |  | Prkce    |  | Krt222  |  |
|  |  |  | Prpf4    |  | Ky      |  |
|  |  |  | Prps2    |  | L2hgdh  |  |
|  |  |  | Psmb2    |  | Lace1   |  |
|  |  |  | Psmb5    |  | Lama5   |  |
|  |  |  | Psmb7    |  | Larp2   |  |
|  |  |  | Psmel    |  | Larp4   |  |
|  |  |  | Pstpip2  |  | Lars2   |  |
|  |  |  | Ptcd1    |  | Lass4   |  |
|  |  |  | Ptcd2    |  | Lbh     |  |
|  |  |  | Ptcd3    |  | Lclat1  |  |
|  |  |  | Ptdss2   |  | Lcmt2   |  |
|  |  |  | Ptges2   |  | Ldb3    |  |
|  |  |  | Ptgr2    |  | Ldhh    |  |
|  |  |  | Ptp4a3   |  | Ldhd    |  |
|  |  |  | Pygm     |  | Lepr    |  |
|  |  |  | Qdpr     |  | Lgals4  |  |
|  |  |  | Qsox2    |  | Lgi1    |  |
|  |  |  | Rab12    |  | Limch1  |  |
|  |  |  | Rabgta   |  | Llgl2   |  |
|  |  |  | Ranbp6   |  | Lmf1    |  |
|  |  |  | Rapgef2  |  | Lmo7    |  |
|  |  |  | Rapgef3  |  | Lmod3   |  |
|  |  |  | Rapgef4  |  | Lpcat3  |  |
|  |  |  | Rapsn    |  | Lphn2   |  |
|  |  |  | Rasgrp2  |  | Lpin1   |  |
|  |  |  | Rbbp7    |  | Lpl     |  |
|  |  |  | Rbm24    |  | Lrppre  |  |
|  |  |  | Rbm38    |  | Lrrc20  |  |
|  |  |  | Rdh13    |  | Lrrc39  |  |
|  |  |  | Rdh14    |  | Lrrc4b  |  |
|  |  |  | Reep1    |  | Lrrc68  |  |
|  |  |  | Rgs7bp   |  | Lrtm1   |  |
|  |  |  | Rhbdd3   |  | Lsm14b  |  |
|  |  |  | Rhbdl3   |  | Lzic    |  |
|  |  |  | Rhobtb3  |  | M6prbp1 |  |
|  |  |  | Rhot2    |  | Macrodl |  |
|  |  |  | Rit1     |  | Magi3   |  |
|  |  |  | Rmnd5a   |  | Magix   |  |
|  |  |  | Rnf114   |  | Maob    |  |

|  |  |            |         |
|--|--|------------|---------|
|  |  | Rnf123     | Map3k5  |
|  |  | Rnf128     | Map4k2  |
|  |  | Rnls       | Mapt    |
|  |  | Rnmtl1     | Mars2   |
|  |  | Rom1       | Mast2   |
|  |  | Rorc       | Mblac2  |
|  |  | Rpa3       | Mboat2  |
|  |  | Rprd1a     | Mcat    |
|  |  | Rps6ka5    | Mccc1   |
|  |  | Rrm2b      | Mccc2   |
|  |  | Rsb1l1     | Mcee    |
|  |  | Rtbdn      | Me3     |
|  |  | Rtf1       | Med12l  |
|  |  | Rtn4ip1    | Mepece  |
|  |  | Rtn4r      | Metap1  |
|  |  | Rufy1      | Metap11 |
|  |  | Ryr2       | Metl11b |
|  |  | S100a1     | Mfhas1  |
|  |  | S3-12      | Mfsd7c  |
|  |  | Sbk2       | Mgmt    |
|  |  | Scmh1      | Mgst3   |
|  |  | Scn10a     | Mif4gd  |
|  |  | Sco1       | Mipep   |
|  |  | Scrn3      | Mitf    |
|  |  | Sdha       | Mlf1    |
|  |  | Sdpr       | Mllt6   |
|  |  | Sdr39u1    | Mlxipl  |
|  |  | Sec61a2    | Mlycd   |
|  |  | Sema3a     | Mmab    |
|  |  | Sema4b     | Mmadhc  |
|  |  | Sfrs14     | Mme     |
|  |  | Sgcb       | Mmp15   |
|  |  | Sipa112    | Mospd1  |
|  |  | Six4       | Mpped2  |
|  |  | Slc25a11   | Mpst    |
|  |  | Slc25a12   | Mrgprh  |
|  |  | Slc25a19   | Mrpl1   |
|  |  | Slc25a3    | Mrpl12  |
|  |  | Slc25a33   | Mrpl15  |
|  |  | Slc25a4    | Mrpl23  |
|  |  | Slc26a6    | Mrpl27  |
|  |  | Slc35f5    | Mrpl28  |
|  |  | Slc38a3    | Mrpl37  |
|  |  | Slc38a4    | Mrpl38  |
|  |  | Slc47a1    | Mrpl41  |
|  |  | Slc5a6     | Mrpl45  |
|  |  | Slco5a1    | Mrpl46  |
|  |  | Smap2      | Mrpl48  |
|  |  | Smpd1      | Mrps18a |
|  |  | Smyd2      | Mrps24  |
|  |  | Snrpd3     | Mrps25  |
|  |  | Snrpn      | Mrps28  |
|  |  | Snx15      | Mrps30  |
|  |  | Sod1       | Mrps31  |
|  |  | Sox12      | Mrps35  |
|  |  | Spna1      | Mrps7   |
|  |  | Srfbp1     | Mrps9   |
|  |  | Srl        | Mrf     |
|  |  | Sssca1     | Mrs2    |
|  |  | St6galnac6 | Mtap7   |
|  |  | Stard3     | Mtap7d1 |
|  |  | Stard8     | Mtg1    |
|  |  | Stat5b     | Mtif2   |
|  |  | Stradb     | Mtx1    |
|  |  | Suox       | Mul1    |
|  |  | Syde2      | Murc    |
|  |  | Sypl2      | Mut     |
|  |  | Tacc2      | Myadml2 |
|  |  | Taf4a      | Mybpc2  |

|  |  |  |          |  |            |  |
|--|--|--|----------|--|------------|--|
|  |  |  | Taf6     |  | Myh7b      |  |
|  |  |  | Tarbp2   |  | Myl2       |  |
|  |  |  | Tars2    |  | Myl3       |  |
|  |  |  | Tbc1d24  |  | Mylk4      |  |
|  |  |  | Tfb2m    |  | Myo10      |  |
|  |  |  | Tgfbr3   |  | Myo18a     |  |
|  |  |  | Thap4    |  | Myo18b     |  |
|  |  |  | Thrb     |  | Myo5c      |  |
|  |  |  | Timm23   |  | Myocd      |  |
|  |  |  | Timm44   |  | Myot       |  |
|  |  |  | Timm8b   |  | N6amt2     |  |
|  |  |  | Timp4    |  | Nampt      |  |
|  |  |  | Tmcc1    |  | Narf1      |  |
|  |  |  | Tmed4    |  | Nav2       |  |
|  |  |  | Tmem106b |  | Ncapd3     |  |
|  |  |  | Tmem116  |  | Ncrna00153 |  |
|  |  |  | Tmem141  |  | Ndufa13    |  |
|  |  |  | Tmem147  |  | Ndufa2     |  |
|  |  |  | Tmem160  |  | Ndufa4     |  |
|  |  |  | Tmem161a |  | Ndufa5     |  |
|  |  |  | Tmem170  |  | Ndufa6     |  |
|  |  |  | Tmem170b |  | Ndufa7     |  |
|  |  |  | Tmem223  |  | Ndufa8     |  |
|  |  |  | Tmem50b  |  | Ndufab1    |  |
|  |  |  | Tnip3    |  | Ndufb10    |  |
|  |  |  | Tnnt2    |  | Ndufb11    |  |
|  |  |  | Tomm7    |  | Ndufb4     |  |
|  |  |  | Top1mt   |  | Ndufb5     |  |
|  |  |  | Trap1    |  | Ndufb7     |  |
|  |  |  | Trip10   |  | Ndufb8     |  |
|  |  |  | Trmt5    |  | Ndufb9     |  |
|  |  |  | Ttc21b   |  | Ndufc2     |  |
|  |  |  | Ttc30b   |  | Ndufs3     |  |
|  |  |  | Ttc32    |  | Ndufs4     |  |
|  |  |  | Txlnb    |  | Ndufs7     |  |
|  |  |  | Txnrd2   |  | Ndufv1     |  |
|  |  |  | Txnrd3   |  | Necab1     |  |
|  |  |  | Tysnd1   |  | Neo1       |  |
|  |  |  | Ube2b    |  | Neurl2     |  |
|  |  |  | Ube2e3   |  | Neurl4     |  |
|  |  |  | Ubl3     |  | Nfs1       |  |
|  |  |  | Ubl7     |  | Nit2       |  |
|  |  |  | Ubr2     |  | Nme2       |  |
|  |  |  | Ubr3     |  | Nmnat1     |  |
|  |  |  | Ucp3     |  | Nnt        |  |
|  |  |  | Unc45b   |  | Npc1       |  |
|  |  |  | Ung      |  | Npepl1     |  |
|  |  |  | Uqcc     |  | Nr1d2      |  |
|  |  |  | Uqcrb    |  | Nr3c2      |  |
|  |  |  | Uqcrc2   |  | Nsmaf      |  |
|  |  |  | Uqcrq    |  | Nsmce1     |  |
|  |  |  | Usmg5    |  | Nt5c1a     |  |
|  |  |  | Usp54    |  | Nt5c3      |  |
|  |  |  | Vdac3    |  | Nt5dc2     |  |
|  |  |  | Vegfa    |  | Nt5dc3     |  |
|  |  |  | Vmn2r120 |  | Ntf3       |  |
|  |  |  | Vwa3a    |  | Nudt15     |  |
|  |  |  | Wbscr16  |  | Nudt6      |  |
|  |  |  | Wdr42a   |  | Nudt7      |  |
|  |  |  | Wdte1    |  | Nudt8      |  |
|  |  |  | Wfdc1    |  | Nutf2      |  |
|  |  |  | Wnt5a    |  | Oaz2       |  |
|  |  |  | Wmip1    |  | Obscn      |  |
|  |  |  | Yars2    |  | Obsl1      |  |
|  |  |  | Yipf4    |  | Ogdhl      |  |
|  |  |  | Zdhhc7   |  | Oma1       |  |
|  |  |  | Zfp191   |  | Oplah      |  |
|  |  |  | Zfp358   |  | Optn       |  |
|  |  |  | Zfp606   |  | Osbp2      |  |

|  |  |        |  |         |  |
|--|--|--------|--|---------|--|
|  |  | Zfp715 |  | Osbpl3  |  |
|  |  | Zfp759 |  | Osgep   |  |
|  |  | Zfp771 |  | Osgepl1 |  |
|  |  | Zhx2   |  | P2ry1   |  |
|  |  | Zmynd8 |  | Pacsin3 |  |
|  |  | rp9    |  | Pah     |  |
|  |  |        |  | Pank1   |  |
|  |  |        |  | Pank4   |  |
|  |  |        |  | Paqr9   |  |
|  |  |        |  | Pcca    |  |
|  |  |        |  | Pccb    |  |
|  |  |        |  | Pcdh7   |  |
|  |  |        |  | Pcnt    |  |
|  |  |        |  | Pctk3   |  |
|  |  |        |  | Pcyt2   |  |
|  |  |        |  | Pde11a  |  |
|  |  |        |  | Pde3a   |  |
|  |  |        |  | Pdhal   |  |
|  |  |        |  | Pdk2    |  |
|  |  |        |  | Pebpl   |  |
|  |  |        |  | Peci    |  |
|  |  |        |  | Peo1    |  |
|  |  |        |  | Perp    |  |
|  |  |        |  | Pet112l |  |
|  |  |        |  | Pex10   |  |
|  |  |        |  | Pex11a  |  |
|  |  |        |  | Pex16   |  |
|  |  |        |  | Pex19   |  |
|  |  |        |  | Pex6    |  |
|  |  |        |  | Pex7    |  |
|  |  |        |  | Pfkfb1  |  |
|  |  |        |  | Pgpepl  |  |
|  |  |        |  | Phb     |  |
|  |  |        |  | Phb2    |  |
|  |  |        |  | Phf7    |  |
|  |  |        |  | Phlpp   |  |
|  |  |        |  | Phpt1   |  |
|  |  |        |  | Pick1   |  |
|  |  |        |  | Pigo    |  |
|  |  |        |  | Pik3c2b |  |
|  |  |        |  | Pik3ip1 |  |
|  |  |        |  | Pink1   |  |
|  |  |        |  | Pitpnc1 |  |
|  |  |        |  | Pkd2l2  |  |
|  |  |        |  | Pkia    |  |
|  |  |        |  | Pla2g16 |  |
|  |  |        |  | Pla2g4e |  |
|  |  |        |  | Plag1   |  |
|  |  |        |  | Plekhh3 |  |
|  |  |        |  | Plekhm2 |  |
|  |  |        |  | Plscr2  |  |
|  |  |        |  | Plxnb1  |  |
|  |  |        |  | Pm20d1  |  |
|  |  |        |  | Pm20d2  |  |
|  |  |        |  | Pnpla2  |  |
|  |  |        |  | Poldip2 |  |
|  |  |        |  | Polg    |  |
|  |  |        |  | Polq    |  |
|  |  |        |  | Polr1a  |  |
|  |  |        |  | Polr1b  |  |
|  |  |        |  | Polr2f  |  |
|  |  |        |  | Polrmt  |  |
|  |  |        |  | Ppa2    |  |
|  |  |        |  | Ppapdc3 |  |
|  |  |        |  | Ppara   |  |
|  |  |        |  | Ppfibp2 |  |
|  |  |        |  | Ppif    |  |
|  |  |        |  | Ppil1   |  |
|  |  |        |  | Ppmlj   |  |

|  |  |  |  |  |          |  |
|--|--|--|--|--|----------|--|
|  |  |  |  |  | Ppm1k    |  |
|  |  |  |  |  | Ppm1l    |  |
|  |  |  |  |  | Ppp1r3d  |  |
|  |  |  |  |  | Ppp5c    |  |
|  |  |  |  |  | Pptc7    |  |
|  |  |  |  |  | Prdm16   |  |
|  |  |  |  |  | Prdx5    |  |
|  |  |  |  |  | Prepl    |  |
|  |  |  |  |  | Prickle3 |  |
|  |  |  |  |  | Prkab1   |  |
|  |  |  |  |  | Prkag1   |  |
|  |  |  |  |  | Prkcq    |  |
|  |  |  |  |  | Prlr     |  |
|  |  |  |  |  | Prodh    |  |
|  |  |  |  |  | Prox1    |  |
|  |  |  |  |  | Prpf19   |  |
|  |  |  |  |  | Prrg1    |  |
|  |  |  |  |  | Psmg1    |  |
|  |  |  |  |  | Ptchd3   |  |
|  |  |  |  |  | Ptgds    |  |
|  |  |  |  |  | Ptov1    |  |
|  |  |  |  |  | Ptpn3    |  |
|  |  |  |  |  | Ptpm     |  |
|  |  |  |  |  | Pts      |  |
|  |  |  |  |  | Pxmp2    |  |
|  |  |  |  |  | Pxmp4    |  |
|  |  |  |  |  | Qrs1l    |  |
|  |  |  |  |  | Rab11b   |  |
|  |  |  |  |  | Rab3a    |  |
|  |  |  |  |  | Raf1     |  |
|  |  |  |  |  | Rai2     |  |
|  |  |  |  |  | Rangrf   |  |
|  |  |  |  |  | Rasd2    |  |
|  |  |  |  |  | Rbm20    |  |
|  |  |  |  |  | Rdm1     |  |
|  |  |  |  |  | Reep5    |  |
|  |  |  |  |  | Retsat   |  |
|  |  |  |  |  | Rhd      |  |
|  |  |  |  |  | Ric8b    |  |
|  |  |  |  |  | Rilp     |  |
|  |  |  |  |  | Rilpl1   |  |
|  |  |  |  |  | Rmnd1    |  |
|  |  |  |  |  | Rnaseh2a |  |
|  |  |  |  |  | Rnf122   |  |
|  |  |  |  |  | Rnf166   |  |
|  |  |  |  |  | Rnf187   |  |
|  |  |  |  |  | Rnf207   |  |
|  |  |  |  |  | Rnf34    |  |
|  |  |  |  |  | Romo1    |  |
|  |  |  |  |  | Rpl36    |  |
|  |  |  |  |  | Rpl3l    |  |
|  |  |  |  |  | Rps17    |  |
|  |  |  |  |  | Rps6ka2  |  |
|  |  |  |  |  | Rpusd3   |  |
|  |  |  |  |  | Rpusd4   |  |
|  |  |  |  |  | Rragd    |  |
|  |  |  |  |  | Rreb1    |  |
|  |  |  |  |  | Rtn2     |  |
|  |  |  |  |  | Rwdd4a   |  |
|  |  |  |  |  | Rxrg     |  |
|  |  |  |  |  | Samm50   |  |
|  |  |  |  |  | Saps2    |  |
|  |  |  |  |  | Sar1b    |  |
|  |  |  |  |  | Sars2    |  |
|  |  |  |  |  | Sbk1     |  |
|  |  |  |  |  | Sbpl     |  |
|  |  |  |  |  | Scd4     |  |
|  |  |  |  |  | Scgb1c1  |  |
|  |  |  |  |  | Scn4a    |  |

|  |  |  |  |  |           |  |
|--|--|--|--|--|-----------|--|
|  |  |  |  |  | Scn4b     |  |
|  |  |  |  |  | Sdhb      |  |
|  |  |  |  |  | Sdhc      |  |
|  |  |  |  |  | Sdhd      |  |
|  |  |  |  |  | Sec31b    |  |
|  |  |  |  |  | Selenbp1  |  |
|  |  |  |  |  | Selenbp2  |  |
|  |  |  |  |  | Serac1    |  |
|  |  |  |  |  | Serpina1d |  |
|  |  |  |  |  | Sertad2   |  |
|  |  |  |  |  | Sesn1     |  |
|  |  |  |  |  | Setd1b    |  |
|  |  |  |  |  | Sfrs12ip1 |  |
|  |  |  |  |  | Sgca      |  |
|  |  |  |  |  | Sgcg      |  |
|  |  |  |  |  | Sgol2     |  |
|  |  |  |  |  | Sh2d4a    |  |
|  |  |  |  |  | Sh3rf2    |  |
|  |  |  |  |  | Shank3    |  |
|  |  |  |  |  | Sirt3     |  |
|  |  |  |  |  | Sirt5     |  |
|  |  |  |  |  | Siva1     |  |
|  |  |  |  |  | Slc12a7   |  |
|  |  |  |  |  | Slc16a10  |  |
|  |  |  |  |  | Slc20a2   |  |
|  |  |  |  |  | Slc22a23  |  |
|  |  |  |  |  | Slc22a3   |  |
|  |  |  |  |  | Slc22a5   |  |
|  |  |  |  |  | Slc25a13  |  |
|  |  |  |  |  | Slc25a15  |  |
|  |  |  |  |  | Slc25a20  |  |
|  |  |  |  |  | Slc25a22  |  |
|  |  |  |  |  | Slc25a26  |  |
|  |  |  |  |  | Slc25a34  |  |
|  |  |  |  |  | Slc25a38  |  |
|  |  |  |  |  | Slc25a42  |  |
|  |  |  |  |  | Slc26a10  |  |
|  |  |  |  |  | Slc27a1   |  |
|  |  |  |  |  | Slc2a12   |  |
|  |  |  |  |  | Slc2a4    |  |
|  |  |  |  |  | Slc35e1   |  |
|  |  |  |  |  | Slc36a2   |  |
|  |  |  |  |  | Slc37a4   |  |
|  |  |  |  |  | Slc41a1   |  |
|  |  |  |  |  | Slc46a3   |  |
|  |  |  |  |  | Slc4a3    |  |
|  |  |  |  |  | Slc9a2    |  |
|  |  |  |  |  | Slc9a3r2  |  |
|  |  |  |  |  | Slc9a6    |  |
|  |  |  |  |  | Smarcd1   |  |
|  |  |  |  |  | Smer7     |  |
|  |  |  |  |  | Smpd2     |  |
|  |  |  |  |  | Smyd1     |  |
|  |  |  |  |  | Snx16     |  |
|  |  |  |  |  | Sobp      |  |
|  |  |  |  |  | Sod2      |  |
|  |  |  |  |  | Sord      |  |
|  |  |  |  |  | Spag7     |  |
|  |  |  |  |  | Spq7      |  |
|  |  |  |  |  | Spnb1     |  |
|  |  |  |  |  | Spryd4    |  |
|  |  |  |  |  | Srpk3     |  |
|  |  |  |  |  | St3gal3   |  |
|  |  |  |  |  | Stard7    |  |
|  |  |  |  |  | Stat5a    |  |
|  |  |  |  |  | Stfa1     |  |
|  |  |  |  |  | Stom      |  |
|  |  |  |  |  | Sucla2    |  |
|  |  |  |  |  | Suc1g1    |  |



|  |  |  |  |  |          |  |
|--|--|--|--|--|----------|--|
|  |  |  |  |  | Suclg2   |  |
|  |  |  |  |  | Sunc1    |  |
|  |  |  |  |  | Supv311  |  |
|  |  |  |  |  | Svip     |  |
|  |  |  |  |  | Synj2    |  |
|  |  |  |  |  | Syt7     |  |
|  |  |  |  |  | Tarsl2   |  |
|  |  |  |  |  | Tbc1d16  |  |
|  |  |  |  |  | Tbc1d4   |  |
|  |  |  |  |  | Tbrg4    |  |
|  |  |  |  |  | Tcap     |  |
|  |  |  |  |  | Tcea3    |  |
|  |  |  |  |  | Tcf15    |  |
|  |  |  |  |  | Tcp1l12  |  |
|  |  |  |  |  | Tef      |  |
|  |  |  |  |  | Tesc     |  |
|  |  |  |  |  | Tfam     |  |
|  |  |  |  |  | Tfb1m    |  |
|  |  |  |  |  | Tfdp2    |  |
|  |  |  |  |  | Tfpt     |  |
|  |  |  |  |  | Thap6    |  |
|  |  |  |  |  | Thrsp    |  |
|  |  |  |  |  | Tiaf2    |  |
|  |  |  |  |  | Tmc7     |  |
|  |  |  |  |  | Tmc8     |  |
|  |  |  |  |  | Tmeff1   |  |
|  |  |  |  |  | Tmem117  |  |
|  |  |  |  |  | Tmem120b |  |
|  |  |  |  |  | Tmem135  |  |
|  |  |  |  |  | Tmem143  |  |
|  |  |  |  |  | Tmem150  |  |
|  |  |  |  |  | Tmem159  |  |
|  |  |  |  |  | Tmem182  |  |
|  |  |  |  |  | Tmem201  |  |
|  |  |  |  |  | Tmem205  |  |
|  |  |  |  |  | Tmem22   |  |
|  |  |  |  |  | Tmem25   |  |
|  |  |  |  |  | Tmem38b  |  |
|  |  |  |  |  | Tmem63b  |  |
|  |  |  |  |  | Tmem65   |  |
|  |  |  |  |  | Tmem66   |  |
|  |  |  |  |  | Tmem82   |  |
|  |  |  |  |  | Tmem86a  |  |
|  |  |  |  |  | Tmod4    |  |
|  |  |  |  |  | Tnfaip8  |  |
|  |  |  |  |  | Tnnc1    |  |
|  |  |  |  |  | Tnni3    |  |
|  |  |  |  |  | Tnni3k   |  |
|  |  |  |  |  | Tomm40l  |  |
|  |  |  |  |  | Trappc2l |  |
|  |  |  |  |  | Trappc5  |  |
|  |  |  |  |  | Trdn     |  |
|  |  |  |  |  | Trim54   |  |
|  |  |  |  |  | Trim55   |  |
|  |  |  |  |  | Trim63   |  |
|  |  |  |  |  | Trim7    |  |
|  |  |  |  |  | Trim72   |  |
|  |  |  |  |  | Trmt2b   |  |
|  |  |  |  |  | Trpm4    |  |
|  |  |  |  |  | Try10    |  |
|  |  |  |  |  | Tsfm     |  |
|  |  |  |  |  | Ttc19    |  |
|  |  |  |  |  | Ttc30a2  |  |
|  |  |  |  |  | Ttc38    |  |
|  |  |  |  |  | Ttn      |  |
|  |  |  |  |  | Tuba4a   |  |
|  |  |  |  |  | Tuba8    |  |
|  |  |  |  |  | Tufm     |  |
|  |  |  |  |  | Tusc4    |  |

|  |  |  |  |  |         |  |
|--|--|--|--|--|---------|--|
|  |  |  |  |  | Twf2    |  |
|  |  |  |  |  | U2af114 |  |
|  |  |  |  |  | Ubac1   |  |
|  |  |  |  |  | Ube2d1  |  |
|  |  |  |  |  | Ube2o   |  |
|  |  |  |  |  | Ube3b   |  |
|  |  |  |  |  | Ubxn2a  |  |
|  |  |  |  |  | Ulk1    |  |
|  |  |  |  |  | Unc84b  |  |
|  |  |  |  |  | Uqcr    |  |
|  |  |  |  |  | Uqcrc1  |  |
|  |  |  |  |  | Uqcrfs1 |  |
|  |  |  |  |  | Uqcrh   |  |
|  |  |  |  |  | Uros    |  |
|  |  |  |  |  | Ushbp1  |  |
|  |  |  |  |  | Usp2    |  |
|  |  |  |  |  | Usp28   |  |
|  |  |  |  |  | Uxt     |  |
|  |  |  |  |  | Vdac1   |  |
|  |  |  |  |  | Vegfb   |  |
|  |  |  |  |  | Vldlr   |  |
|  |  |  |  |  | Wdr18   |  |
|  |  |  |  |  | Wdr21   |  |
|  |  |  |  |  | Wdr23   |  |
|  |  |  |  |  | Wdr40b  |  |
|  |  |  |  |  | Wdr5    |  |
|  |  |  |  |  | Wfdc6a  |  |
|  |  |  |  |  | Whrn    |  |
|  |  |  |  |  | Wnk2    |  |
|  |  |  |  |  | Wnk4    |  |
|  |  |  |  |  | Xk      |  |
|  |  |  |  |  | Xpo4    |  |
|  |  |  |  |  | Ybx2    |  |
|  |  |  |  |  | Yipf7   |  |
|  |  |  |  |  | Zadh2   |  |
|  |  |  |  |  | Zc3h7b  |  |
|  |  |  |  |  | Zfand1  |  |
|  |  |  |  |  | Zfand5  |  |
|  |  |  |  |  | Zfp422  |  |
|  |  |  |  |  | Zfp612  |  |
|  |  |  |  |  | Zfyve21 |  |
|  |  |  |  |  | Zh2c2   |  |
|  |  |  |  |  | Zim1    |  |
|  |  |  |  |  | Zscan20 |  |
|  |  |  |  |  | Zswim7  |  |
|  |  |  |  |  | Zyg11b  |  |

**Table S2:** Ingenuity Pathway analysis. Biological function of genes regulated in 6 month old Arg and Gly transgenic models was subjected to Ingenuity Pathway analysis and is described in the table.

| Gene Annotation                         | Down-Reg Arg | Down-Reg Gly | Up-Reg Arg | Up-Reg Gly |
|-----------------------------------------|--------------|--------------|------------|------------|
| Metabolic Diseases                      | 385          | 248          | 442        | 334        |
| Cellular Growth and Proliferation       | 46           | 16           | 568        | 442        |
| Lipid Metabolism (including fatty acid) | 171          | 110          | 188        | 116        |
| Gene Expression                         | 27           | 32           | 88         | 64         |
| Molecular Transport                     | 167          | 95           | 138        | 154        |
| Cell Signaling                          | 6            | 20           | 120        | 122        |
| Cardiovascular Disease                  | 291          | 200          | 438        | 319        |
| Inflammatory Disease                    | 42           | 35           | 537        | 418        |
| Inflammatory Response                   | 4            | 4            | 347        | 306        |
| Apoptosis                               | 58           | 5            | 431        | 336        |

**Table S3:** Ingenuity Pathway analysis. Biological function of genes regulated in 3 month old Arg and Gly transgenic models was subjected to Ingenuity Pathway analysis and is described in the table.

| Gene Annotation                         | Down-Reg Arg | Down-Reg Gly | Up-Reg Arg | Up-Reg Gly |
|-----------------------------------------|--------------|--------------|------------|------------|
| Metabolic Diseases                      | 129          | 89           | 12         | 18         |
| Cellular Growth and Proliferation       | 5            | 26           | 182        | 93         |
| Lipid Metabolism (including fatty acid) | 52           | 37           | 7          | 42         |
| Gene Expression                         | 19           | 53           | 9          | 63         |
| Molecular Transport                     | 60           | 29           | 58         | 42         |
| Cell Signaling                          | 4            | 3            | 81         | 44         |
| Cardiovascular Disease                  | 107          | 80           | 48         | 73         |
| Inflammatory Disease                    | 8            | 14           | 177        | 99         |
| Inflammatory Response                   | 5            | 2            | 134        | 66         |
| Apoptosis                               |              | 3            | 133        | 70         |

**Table S4:** Ingenuity Pathway analysis. Biological function of genes regulated in all transgenic models was subjected to Ingenuity Pathway analysis and is described in the table.

| Gene Annotation                         | Down-Reg - All | Up-Reg - All |
|-----------------------------------------|----------------|--------------|
| Metabolic Diseases                      | 7              | 38           |
| Cellular Growth and Proliferation       | 35             | 4            |
| Lipid Metabolism (including fatty acid) | 21             | 17           |
| Gene Expression                         | 7              | 1            |
| Molecular Transport                     | 20             | 22           |
| Cell Signaling                          | 4              | 19           |
| Cardiovascular Disease                  | 33             | 15           |
| Inflammatory Disease                    | 4              | 39           |
| Inflammatory Response                   | 1              | 30           |
| Apoptosis                               | 1              | 26           |

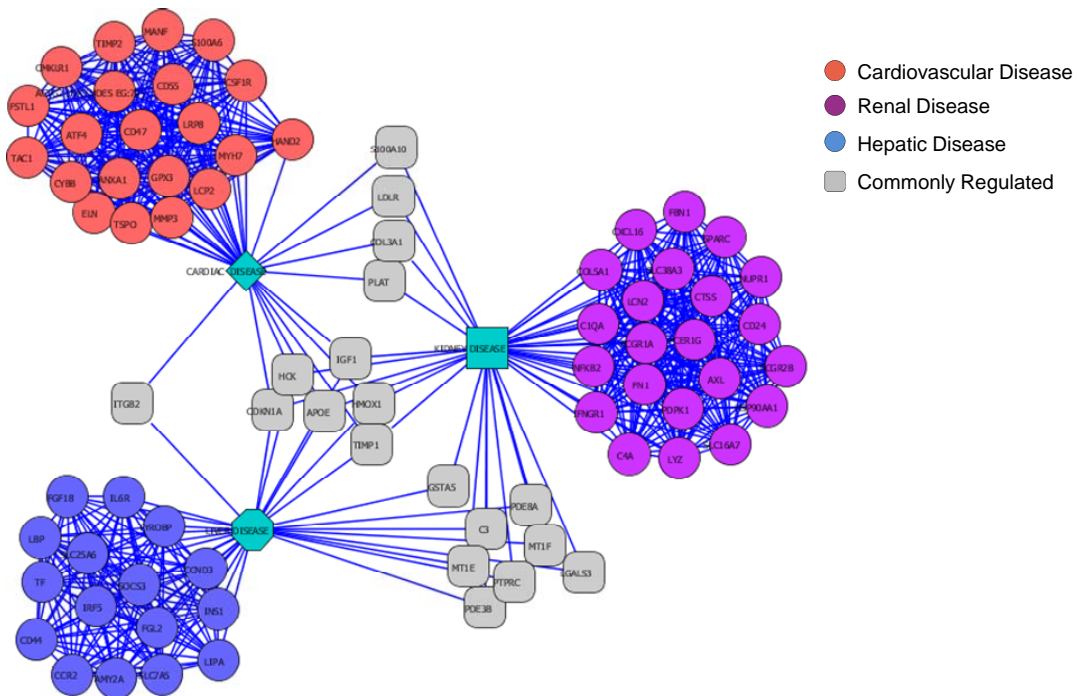

A

3 months  $\beta_1$ Arg389 up-regulated genes

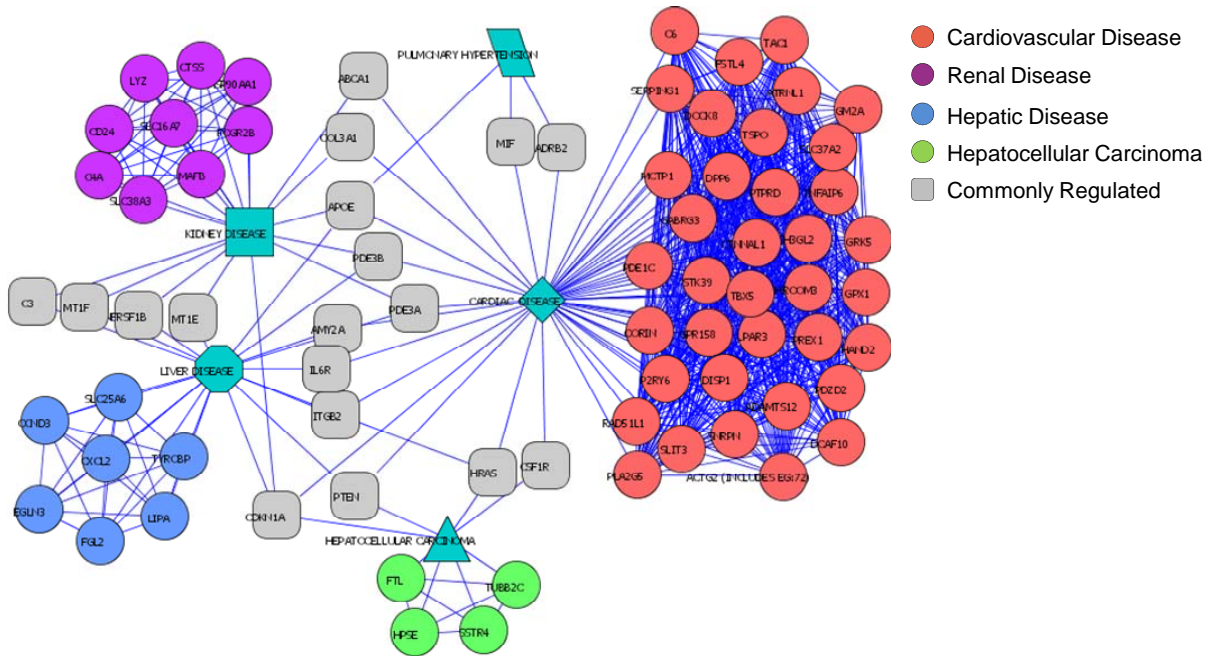

B

3 months  $\beta_1$ Gly389 up-regulated genes

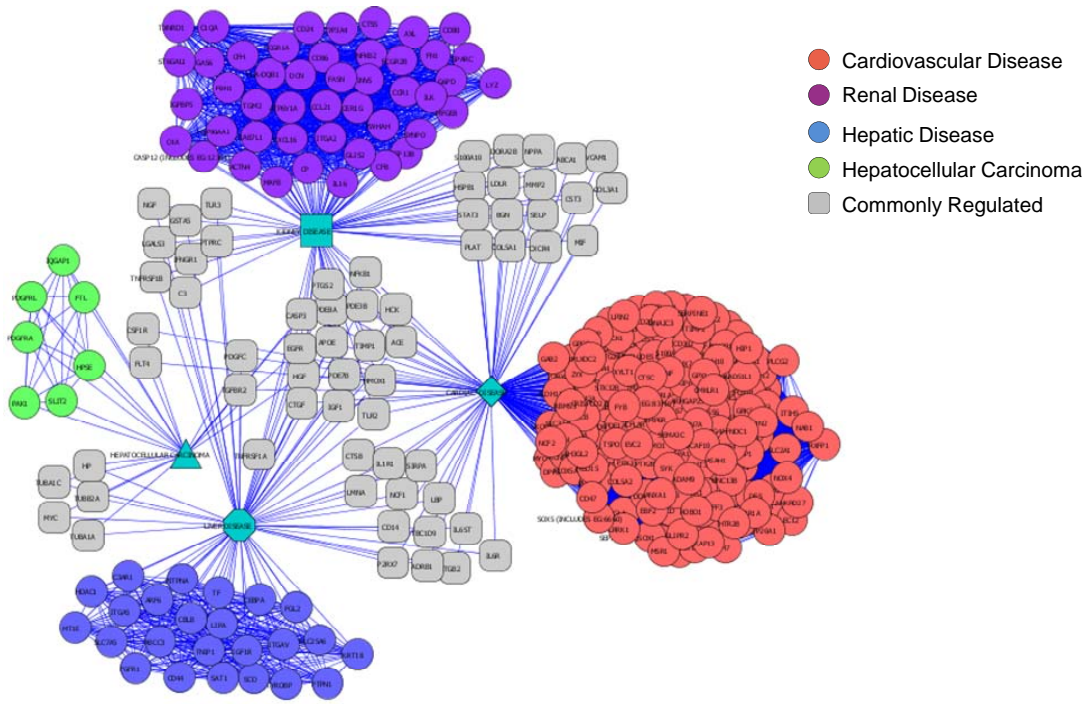

C

6 months  $\beta_1$ Gly389 up-regulated genes

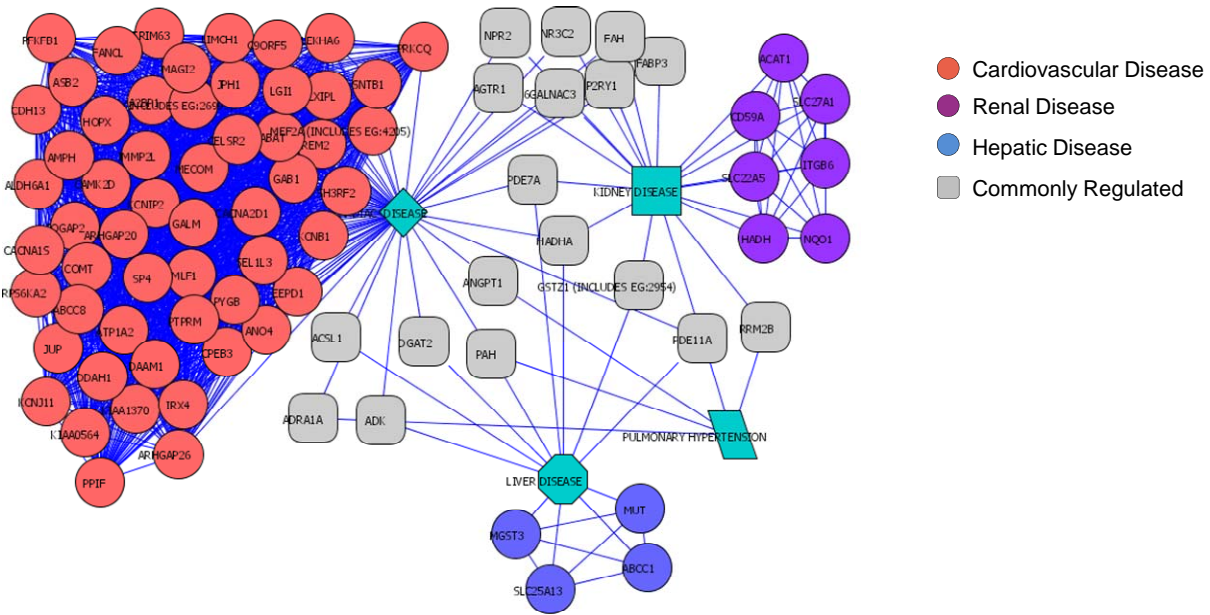

D

3 months  $\beta_1$ Arg389 down-regulated genes

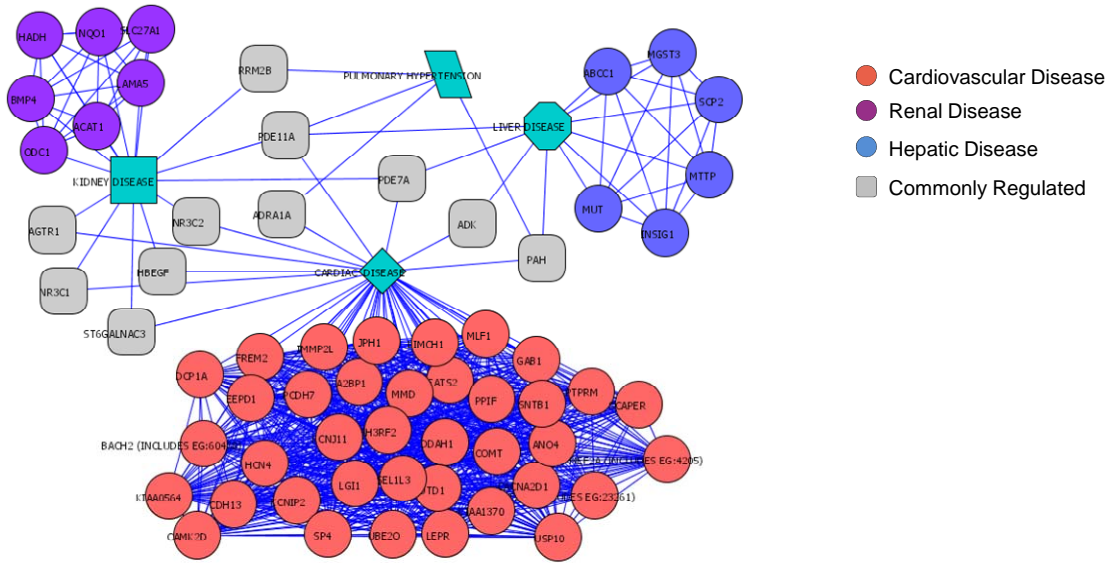

**E** 3 months  $\beta_1$ Gly389 down-regulated genes

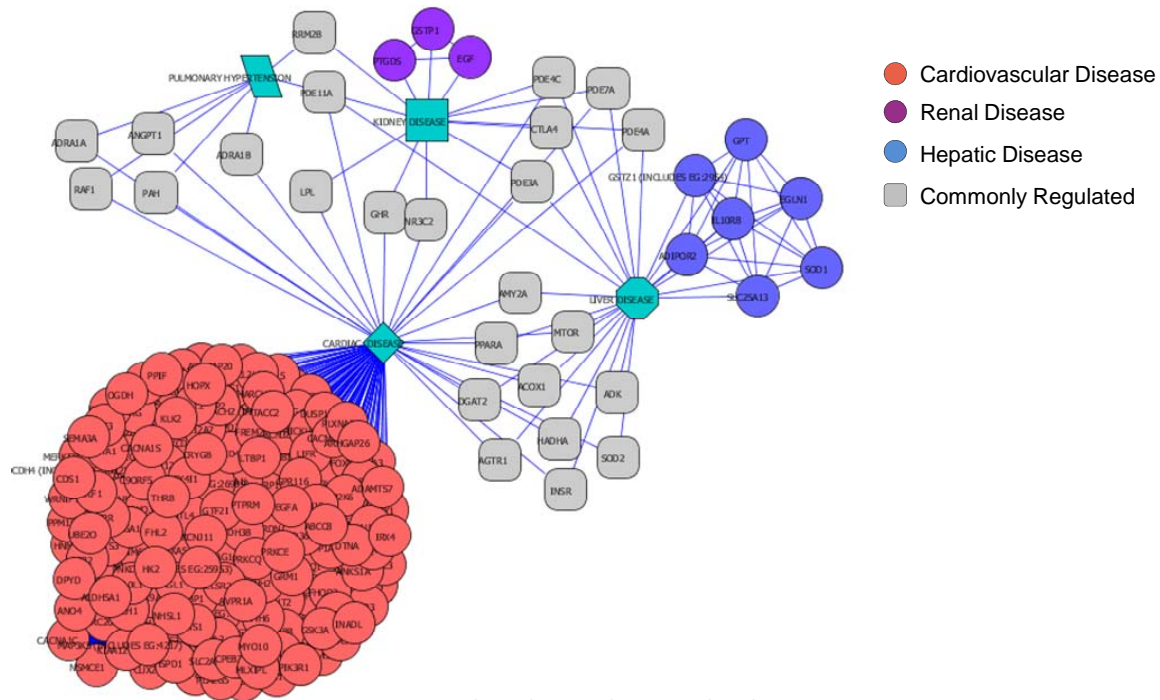

**F** 6 months  $\beta_1$ Arg389 down-regulated genes

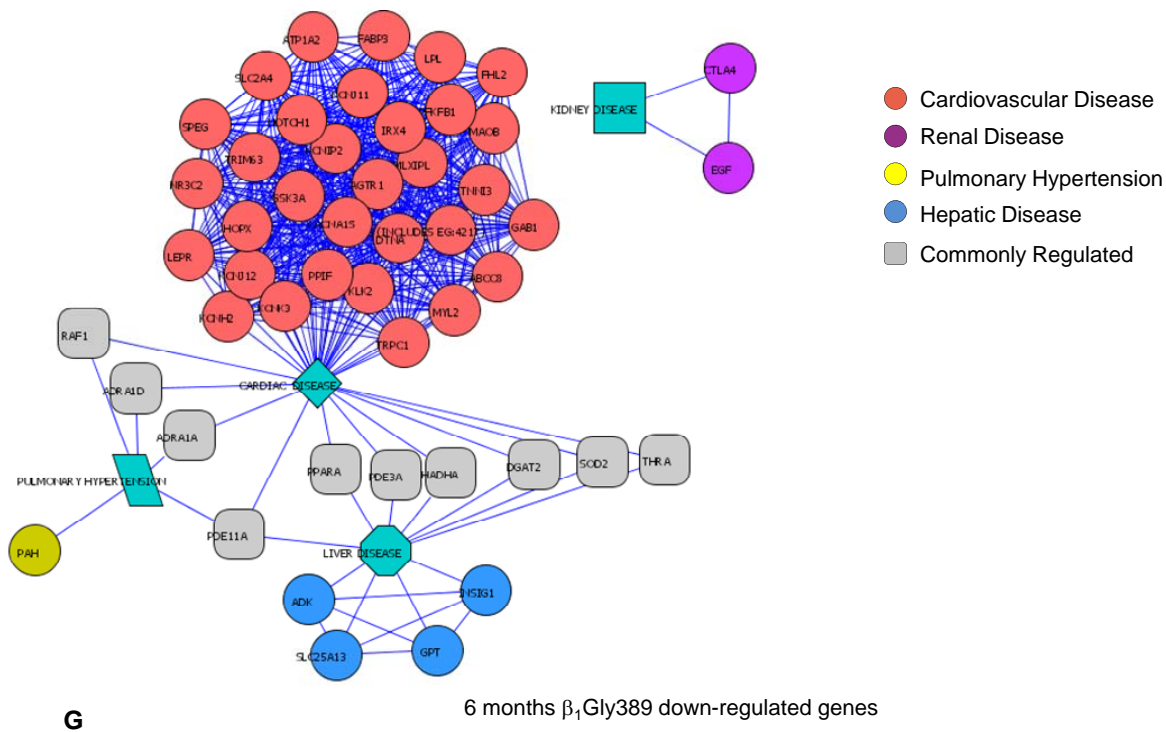

Figure S1: Network of Disease analysis of differentially regulated genes. Genes up- or down-regulated in  $\beta_1$ -Arg389 or  $\beta_1$ -Gly389 transgenic animals were subjected to Ingenuity Pathway analysis. Based on the toxicology function results, a Network of Diseases was generated. (A) 3 months  $\beta_1$ Arg389 up-regulated genes, (B) pathways 3 months  $\beta_1$ Gly389 up-regulated genes, (C) 6 months  $\beta_1$ Gly389 up-regulated genes, (D) 3 months  $\beta_1$ Arg389 down-regulated genes, (E) 3 months  $\beta_1$ Gly389 down-regulated genes, (F) 6 months  $\beta_1$ Arg389 down-regulated genes, (G) 6 months  $\beta_1$ Gly389 down-regulated genes. Diseases are color coded according and genes commonly regulated in multiples diseases are linked by a line.

Table S5: Network of Diseases and representative genes. Colors and geometrical symbols are represented on Figures 4 and S1.

| 3 months $\beta_1$ Arg389 up-regulated |                        |                    |       |                                                                                                                                                                                                                |
|----------------------------------------|------------------------|--------------------|-------|----------------------------------------------------------------------------------------------------------------------------------------------------------------------------------------------------------------|
| Gene Symbol                            | Disease - General      | Geometrical symbol | Color | Disease - Specified                                                                                                                                                                                            |
| ACTG2                                  | Cardiovascular disease | circle             | pink  | Cardiovascular Infarction                                                                                                                                                                                      |
| CD47                                   | Cardiovascular disease | circle             | pink  | Cardiovascular Infarction                                                                                                                                                                                      |
| CD55                                   | Cardiovascular disease | circle             | pink  | Cardiovascular Infarction                                                                                                                                                                                      |
| CSF1R                                  | Cardiovascular disease | circle             | pink  | Cardiovascular Infarction                                                                                                                                                                                      |
| CYBB                                   | Cardiovascular disease | circle             | pink  | Cardiovascular Infarction                                                                                                                                                                                      |
| FSTL1                                  | Cardiovascular disease | circle             | pink  | Cardiovascular Infarction,Cardiovascular Necrosis/Cell Death                                                                                                                                                   |
| LRP8                                   | Cardiovascular disease | circle             | pink  | Cardiovascular Infarction                                                                                                                                                                                      |
| TSPO                                   | Cardiovascular disease | circle             | pink  | Cardiovascular Infarction                                                                                                                                                                                      |
| LCP2                                   | Cardiovascular disease | circle             | pink  | Tachycardia                                                                                                                                                                                                    |
| TAC1                                   | Cardiovascular disease | circle             | pink  | Tachycardia                                                                                                                                                                                                    |
| MANF                                   | Cardiovascular disease | circle             | pink  | Cardiovascular Necrosis/Cell Death                                                                                                                                                                             |
| TIMP2                                  | Cardiovascular disease | circle             | pink  | Cardiovascular Necrosis/Cell Death,Cardiovascular Stenosis                                                                                                                                                     |
| ANXA1                                  | Cardiovascular disease | circle             | pink  | Cardiovascular Damage                                                                                                                                                                                          |
| ATF4                                   | Cardiovascular disease | circle             | pink  | Cardiovascular Damage                                                                                                                                                                                          |
| MYH7                                   | Cardiovascular disease | circle             | pink  | Cardiovascular Damage                                                                                                                                                                                          |
| ELN                                    | Cardiovascular disease | circle             | pink  | Cardiovascular Stenosis                                                                                                                                                                                        |
| MMP3                                   | Cardiovascular disease | circle             | pink  | Cardiovascular Stenosis                                                                                                                                                                                        |
| HAND2                                  | Cardiovascular disease | circle             | pink  | Cardiovascular Proliferation                                                                                                                                                                                   |
| CMKLR1                                 | Cardiovascular disease | circle             | pink  | Cardiovascular Hypertrophy                                                                                                                                                                                     |
| GPX3                                   | Cardiovascular disease | circle             | pink  | Cardiovascular Hypertrophy                                                                                                                                                                                     |
| S100A6                                 | Cardiovascular disease | circle             | pink  | Cardiovascular Hypertrophy                                                                                                                                                                                     |
| COL3A1                                 | complex                | Rounded square     | gray  | Renal Tubule Injury,Cardiovascular Infarction                                                                                                                                                                  |
| GSTA5                                  | complex                | Rounded square     | gray  | Renal Tubule Injury,Hepatic Hyperbilirubinemia                                                                                                                                                                 |
| IGF1                                   | complex                | Rounded square     | gray  | Renal Tubule Injury,Hepatic Necrosis/Cell Death,Hepatic Proliferation,Renal Damage,Renal Proliferation,Renal Necrosis/Cell Death,Cardiovascular Damage,Cardiovascular Proliferation,Cardiovascular Hypertrophy |
| LGALS3                                 | complex                | Rounded square     | gray  | Renal Tubule Injury,Hepatic Proliferation,Glomerular Injury                                                                                                                                                    |
| S100A10                                | complex                | Rounded square     | gray  | Renal Tubule Injury,Cardiovascular Hypertrophy                                                                                                                                                                 |
| TIMP1                                  | complex                | Rounded square     | gray  | Renal Tubule Injury,Hepatic Necrosis/Cell Death,Hepatic Hyperplasia/Hyperproliferation,Cardiovascular Stenosis,Cardiovascular Hypertrophy                                                                      |
| MT1E                                   | complex                | Rounded square     | gray  | Hepatic Necrosis/Cell Death,Renal Enlargement,Hepatic Hemorrhaging,Hepatic Damage                                                                                                                              |
| MT1F                                   | complex                | Rounded square     | gray  | Hepatic Necrosis/Cell Death,Renal Enlargement,Hepatic Hemorrhaging,Renal Necrosis/Cell Death,Hepatic Damage                                                                                                    |
| APOE                                   | complex                | Rounded square     | gray  | Cardiovascular Infarction,Hepatic Necrosis/Cell Death,Glomerular Injury,Renal Proliferation,Renal Necrosis/Cell Death,Hepatic Steatosis                                                                        |
| C3                                     | complex                | Rounded square     | gray  | Hepatic Proliferation,Hepatic Hyperplasia/Hyperproliferation,Glomerular Injury,Renal Damage,Hepatic Damage                                                                                                     |
| HCK                                    | complex                | Rounded square     | gray  | Renal Damage,Hepatic Damage,Cardiovascular Hypertrophy                                                                                                                                                         |



|          |                 |                |        |                                                                                                                                                                   |
|----------|-----------------|----------------|--------|-------------------------------------------------------------------------------------------------------------------------------------------------------------------|
| PLAT     | complex         | Rounded square | gray   | Cardiovascular Infarction, Renal Damage                                                                                                                           |
| CDKN1A   | complex         | Rounded square | gray   | Hepatic Necrosis/Cell Death, Hepatic Proliferation, Renal Nephritis, Cardiovascular Necrosis/Cell Death, Renal Necrosis/Cell Death, Hepatic Damage, Renal Failure |
| PTPRC    | complex         | Rounded square | gray   | Hepatic Necrosis/Cell Death, Renal Nephritis                                                                                                                      |
| PDE3B    | complex         | Rounded square | gray   | Renal Nephritis, Renal Failure, Hepatic Steatosis                                                                                                                 |
| PDE8A    | complex         | Rounded square | gray   | Renal Nephritis, Renal Failure, Hepatic Steatosis                                                                                                                 |
| LDLR     | complex         | Rounded square | gray   | Cardiovascular Stenosis, Renal Failure                                                                                                                            |
| HMOX1    | complex         | Rounded square | gray   | Hepatic Necrosis/Cell Death, Cardiovascular Damage, Renal Failure, Hepatic Hyperbilirubinemia                                                                     |
| ITGB2    | complex         | Rounded square | gray   | Cardiovascular Infarction, Hepatic Necrosis/Cell Death, Hepatic Damage, Cardiovascular Damage, Cardiovascular Proliferation                                       |
| CD24     | Renal disease   | circle         | purple | Renal Tubule Injury                                                                                                                                               |
| COL5A1   | Renal disease   | circle         | purple | Renal Tubule Injury                                                                                                                                               |
| CTSS     | Renal disease   | circle         | purple | Renal Tubule Injury                                                                                                                                               |
| FBN1     | Renal disease   | circle         | purple | Renal Tubule Injury                                                                                                                                               |
| FN1      | Renal disease   | circle         | purple | Renal Tubule Injury, Glomerular Injury                                                                                                                            |
| HSP90AA1 | Renal disease   | circle         | purple | Renal Tubule Injury                                                                                                                                               |
| LYZ      | Renal disease   | circle         | purple | Renal Tubule Injury                                                                                                                                               |
| SLC16A7  | Renal disease   | circle         | purple | Renal Tubule Injury                                                                                                                                               |
| SLC38A3  | Renal disease   | circle         | purple | Renal Tubule Injury                                                                                                                                               |
| FCER1G   | Renal disease   | circle         | purple | Glomerular Injury, Renal Proliferation, Renal Failure                                                                                                             |
| SPARC    | Renal disease   | circle         | purple | Glomerular Injury, Renal Proliferation                                                                                                                            |
| C1QA     | Renal disease   | circle         | purple | Renal Damage, Renal Nephritis                                                                                                                                     |
| C4A      | Renal disease   | circle         | purple | Renal Damage, Renal Nephritis                                                                                                                                     |
| FCGR1A   | Renal disease   | circle         | purple | Renal Damage                                                                                                                                                      |
| FCGR2B   | Renal disease   | circle         | purple | Renal Nephritis                                                                                                                                                   |
| IFNGR1   | Renal disease   | circle         | purple | Renal Nephritis                                                                                                                                                   |
| NFKB2    | Renal disease   | circle         | purple | Renal Nephritis                                                                                                                                                   |
| AXL      | Renal disease   | circle         | purple | Renal Proliferation                                                                                                                                               |
| LCN2     | Renal disease   | circle         | purple | Renal Proliferation, Renal Necrosis/Cell Death, Renal Failure                                                                                                     |
| CXCL16   | Renal disease   | circle         | purple | Renal Nephritis                                                                                                                                                   |
| NUPR1    | Renal disease   | circle         | purple | Renal Hypertrophy                                                                                                                                                 |
| PDPK1    | Renal disease   | circle         | purple | Renal Hypertrophy                                                                                                                                                 |
| CCR2     | Hepatic disease | circle         | blue   | Hepatic Necrosis/Cell Death, Hepatic Steatosis                                                                                                                    |
| FGL2     | Hepatic disease | circle         | blue   | Hepatic Necrosis/Cell Death                                                                                                                                       |
| SOCS3    | Hepatic disease | circle         | blue   | Hepatic Necrosis/Cell Death, Hepatic Proliferation                                                                                                                |
| CCND3    | Hepatic disease | circle         | blue   | Hepatic Proliferation                                                                                                                                             |
| FGF18    | Hepatic disease | circle         | blue   | Hepatic Proliferation                                                                                                                                             |
| INS1     | Hepatic disease | circle         | blue   | Hepatic Proliferation                                                                                                                                             |
| SLC7A5   | Hepatic disease | circle         | blue   | Hepatic Proliferation                                                                                                                                             |
| TF       | Hepatic disease | circle         | blue   | Hepatic Proliferation                                                                                                                                             |
| IRF5     | Hepatic disease | circle         | blue   | Hepatic Necrosis/Cell Death                                                                                                                                       |
| SLC25A6  | Hepatic disease | circle         | blue   | Hepatic Necrosis/Cell Death                                                                                                                                       |
| CD44     | Hepatic disease | circle         | blue   | Hepatic Damage                                                                                                                                                    |
| IL6R     | Hepatic disease | circle         | blue   | Hepatic Damage                                                                                                                                                    |
| TYROBP   | Hepatic disease | circle         | blue   | Hepatic Necrosis/Cell Death                                                                                                                                       |
| AMY2A    | Hepatic disease | circle         | blue   | Hepatic Steatosis                                                                                                                                                 |
| LBP      | Hepatic disease | circle         | blue   | Hepatic Steatosis                                                                                                                                                 |
| LIPA     | Hepatic disease | circle         | blue   | Hepatic Steatosis                                                                                                                                                 |

| 3 months $\beta_1$ Gly389 up-regulated |                        |                    |       |                                                        |
|----------------------------------------|------------------------|--------------------|-------|--------------------------------------------------------|
| Gene Symbol                            | Disease - General      | Geometrical symbol | Color | Disease - Specified                                    |
| ACTG2                                  | Cardiovascular disease | circle             | pink  | Cardiovascular Infarction, Cardiovascular Hypertrophy  |
| C6                                     | Cardiovascular disease | circle             | pink  | Cardiovascular Infarction, Cardiovascular Arteriopathy |
| TSPO                                   | Cardiovascular disease | circle             | pink  | Cardiovascular Infarction                              |
| GPX1                                   | Cardiovascular disease | circle             | pink  | Cardiovascular Fibrosis                                |
| TAC1                                   | Cardiovascular disease | circle             | pink  | Tachycardia                                            |

|          |                        |                |      |                                                                                                                                                                                                          |
|----------|------------------------|----------------|------|----------------------------------------------------------------------------------------------------------------------------------------------------------------------------------------------------------|
| SERPING1 | Cardiovascular disease | circle         | pink | Cardiovascular Damage                                                                                                                                                                                    |
| HAND2    | Cardiovascular disease | circle         | pink | Cardiovascular Proliferation                                                                                                                                                                             |
| TBX5     | Cardiovascular disease | circle         | pink | Cardiovascular Proliferation                                                                                                                                                                             |
| ADAMTS12 | Cardiovascular disease | circle         | pink | Cardiovascular Arteriopathy                                                                                                                                                                              |
| ATRNL1   | Cardiovascular disease | circle         | pink | Cardiovascular Arteriopathy                                                                                                                                                                              |
| CTNNAL1  | Cardiovascular disease | circle         | pink | Cardiovascular Arteriopathy                                                                                                                                                                              |
| DCAF10   | Cardiovascular disease | circle         | pink | Cardiovascular Arteriopathy                                                                                                                                                                              |
| DISP1    | Cardiovascular disease | circle         | pink | Cardiovascular Arteriopathy                                                                                                                                                                              |
| DOCK8    | Cardiovascular disease | circle         | pink | Cardiovascular Arteriopathy                                                                                                                                                                              |
| DPP6     | Cardiovascular disease | circle         | pink | Cardiovascular Arteriopathy                                                                                                                                                                              |
| FSTL4    | Cardiovascular disease | circle         | pink | Cardiovascular Arteriopathy                                                                                                                                                                              |
| GABRG3   | Cardiovascular disease | circle         | pink | Cardiovascular Arteriopathy                                                                                                                                                                              |
| GM2A     | Cardiovascular disease | circle         | pink | Cardiovascular Arteriopathy                                                                                                                                                                              |
| GPR158   | Cardiovascular disease | circle         | pink | Cardiovascular Arteriopathy                                                                                                                                                                              |
| GRK5     | Cardiovascular disease | circle         | pink | Cardiovascular Arteriopathy                                                                                                                                                                              |
| LPAR3    | Cardiovascular disease | circle         | pink | Cardiovascular Arteriopathy                                                                                                                                                                              |
| MCTP1    | Cardiovascular disease | circle         | pink | Cardiovascular Arteriopathy                                                                                                                                                                              |
| P2RY6    | Cardiovascular disease | circle         | pink | Cardiovascular Arteriopathy                                                                                                                                                                              |
| PDE1C    | Cardiovascular disease | circle         | pink | Cardiovascular Arteriopathy                                                                                                                                                                              |
| PDZD2    | Cardiovascular disease | circle         | pink | Cardiovascular Arteriopathy                                                                                                                                                                              |
| PLA2G5   | Cardiovascular disease | circle         | pink | Cardiovascular Arteriopathy                                                                                                                                                                              |
| PREX1    | Cardiovascular disease | circle         | pink | Cardiovascular Arteriopathy                                                                                                                                                                              |
| PTPRD    | Cardiovascular disease | circle         | pink | Cardiovascular Arteriopathy                                                                                                                                                                              |
| RAD51L1  | Cardiovascular disease | circle         | pink | Cardiovascular Arteriopathy                                                                                                                                                                              |
| SH3GL2   | Cardiovascular disease | circle         | pink | Cardiovascular Arteriopathy                                                                                                                                                                              |
| SHROOM3  | Cardiovascular disease | circle         | pink | Cardiovascular Arteriopathy                                                                                                                                                                              |
| SLC37A2  | Cardiovascular disease | circle         | pink | Cardiovascular Arteriopathy                                                                                                                                                                              |
| SLIT3    | Cardiovascular disease | circle         | pink | Cardiovascular Arteriopathy                                                                                                                                                                              |
| SNRPN    | Cardiovascular disease | circle         | pink | Cardiovascular Arteriopathy                                                                                                                                                                              |
| STK39    | Cardiovascular disease | circle         | pink | Cardiovascular Arteriopathy                                                                                                                                                                              |
| TNFAIP6  | Cardiovascular disease | circle         | pink | Cardiovascular Arteriopathy                                                                                                                                                                              |
| CORIN    | Cardiovascular disease | circle         | pink | Cardiovascular Hypertrophy                                                                                                                                                                               |
| ADRB1    | complex                | Rounded square | gray | Cardiovascular Infarction,Cardiovascular Fibrosis,Tachycardia,Pulmonary Hypertension,Cardiovascular Arrhythmia,Heart Failure,Cardiovascular Congestive Cardiovascular Failure                            |
| ADRB2    | complex                | Rounded square | gray | Cardiovascular Infarction,Cardiovascular Fibrosis,Tachycardia,Pulmonary Hypertension,Heart Failure,Cardiovascular Hypertrophy,Cardiovascular Thrombosis,Cardiovascular Congestive Cardiovascular Failure |
| APOE     | complex                | Rounded        | gray | Cardiovascular Infarction,Hepatic Necrosis/Cell Death,Hepatic Steatosis,Renal                                                                                                                            |

|          |                          |                |        |                                                                                                                                                                                      |
|----------|--------------------------|----------------|--------|--------------------------------------------------------------------------------------------------------------------------------------------------------------------------------------|
|          |                          | square         |        | Necrosis/Cell Death,Pulmonary Hypertension,Cardiovascular Arteriopathy                                                                                                               |
| COL3A1   | complex                  | Rounded square | gray   | Cardiovascular Infarction,Renal Tubule Injury                                                                                                                                        |
| CSF1R    | complex                  | Rounded square | gray   | Cardiovascular Infarction,Hepatocellular Carcinoma                                                                                                                                   |
| ITGB2    | complex                  | Rounded square | gray   | Cardiovascular Infarction,Hepatic Necrosis/Cell Death,Hepatic Damage,Cardiovascular Arteriopathy,Cardiovascular Proliferation,Cardiovascular Arteriopathy,Hepatic Inflammation       |
| HRAS     | complex                  | Rounded square | gray   | Hepatic Necrosis/Cell Death,Cardiovascular Fibrosis,Hepatic Proliferation,Hepatocellular Carcinoma,Cardiovascular Arrhythmia                                                         |
| ABCA1    | complex                  | Rounded square | gray   | Cardiovascular Arteriopathy,Renal Nephritis                                                                                                                                          |
| AMY2A    | complex                  | Rounded square | gray   | Hepatic Steatosis,Cardiovascular Arteriopathy                                                                                                                                        |
| PDE3A    | complex                  | Rounded square | gray   | Hepatic Steatosis,Heart Failure,Cardiovascular Arteriopathy,Renal Nephritis,Renal Failure,Hepatic Hepatitis,Hepatic Steatohepatitis,Cardiovascular Congestive Cardiovascular Failure |
| PDE3B    | complex                  | Rounded square | gray   | Hepatic Steatosis,Heart Failure,Cardiovascular Arteriopathy,Renal Nephritis,Renal Failure,Hepatic Hepatitis,Hepatic Steatohepatitis,Cardiovascular Congestive Cardiovascular Failure |
| CDKN1A   | complex                  | Rounded square | gray   | Hepatic Necrosis/Cell Death,Hepatic Damage,Renal Necrosis/Cell Death,Hepatic Proliferation,Hepatocellular Carcinoma,Renal Nephritis,Cardiovascular Hypertrophy,Renal Failure         |
| MIF      | complex                  | Rounded square | gray   | Pulmonary Hypertension,Cardiovascular Hypertrophy                                                                                                                                    |
| PTEN     | complex                  | Rounded square | gray   | Hepatic Hyperplasia/Hyperproliferation,Hepatic Steatosis,Hepatocellular Carcinoma,Cardiovascular Hypertrophy,Hepatic Hepatitis,Hepatic Steatohepatitis                               |
| IL6R     | complex                  | Rounded square | gray   | Hepatic Damage,Cardiovascular Hypertrophy                                                                                                                                            |
| C3       | complex                  | Rounded square | gray   | Hepatic Hyperplasia/Hyperproliferation,Hepatic Damage,Hepatic Proliferation,Renal Damage,Renal Dysfunction                                                                           |
| MT1E     | complex                  | Rounded square | gray   | Renal Enlargement,Hepatic Hemorrhaging,Hepatic Necrosis/Cell Death,Hepatic Damage                                                                                                    |
| MT1F     | complex                  | Rounded square | gray   | Renal Enlargement,Hepatic Hemorrhaging,Hepatic Necrosis/Cell Death,Hepatic Damage,Renal Necrosis/Cell Death,Renal Degeneration                                                       |
| TNFRSF1B | complex                  | Rounded square | gray   | Hepatic Necrosis/Cell Death,Hepatic Damage,Renal Necrosis/Cell Death,Hepatic Proliferation,Hepatic Inflammation,Hepatic Hepatitis,Renal Dysfunction                                  |
| FTL      | Hepatocellular Carcinoma | circle         | green  | Hepatocellular Carcinoma                                                                                                                                                             |
| HPSE     | Hepatocellular Carcinoma | circle         | green  | Hepatocellular Carcinoma                                                                                                                                                             |
| SSTR4    | Hepatocellular Carcinoma | circle         | green  | Hepatocellular Carcinoma                                                                                                                                                             |
| TUBB2C   | Hepatocellular Carcinoma | circle         | green  | Hepatocellular Carcinoma                                                                                                                                                             |
| CD24     | Renal disease            | circle         | purple | Renal Tubule Injury                                                                                                                                                                  |
| CTSS     | Renal disease            | circle         | purple | Renal Tubule Injury                                                                                                                                                                  |
| HSP90AA1 | Renal disease            | circle         | purple | Renal Tubule Injury                                                                                                                                                                  |
| LYZ      | Renal disease            | circle         | purple | Renal Tubule Injury                                                                                                                                                                  |
| SLC16A7  | Renal disease            | circle         | purple | Renal Tubule Injury                                                                                                                                                                  |
| SLC38A3  | Renal disease            | circle         | purple | Renal Tubule Injury                                                                                                                                                                  |
| MAFB     | Renal disease            | circle         | purple | Renal Necrosis/Cell Death                                                                                                                                                            |
| C4A      | Renal disease            | circle         | purple | Renal Nephritis                                                                                                                                                                      |
| FCGR2B   | Renal disease            | circle         | purple | Renal Nephritis                                                                                                                                                                      |
| FGL2     | Hepatic disease          | circle         | blue   | Hepatic Necrosis/Cell Death                                                                                                                                                          |
| EGLN3    | Hepatic disease          | circle         | blue   | Hepatic Steatosis                                                                                                                                                                    |
| LIPA     | Hepatic disease          | circle         | blue   | Hepatic Steatosis                                                                                                                                                                    |
| TYROBP   | Hepatic disease          | circle         | blue   | Hepatic Necrosis/Cell Death,Hepatic Hepatitis                                                                                                                                        |
| CCND3    | Hepatic disease          | circle         | blue   | Hepatic Proliferation                                                                                                                                                                |
| SLC25A6  | Hepatic disease          | circle         | blue   | Hepatic Necrosis/Cell Death                                                                                                                                                          |
| CXCL2    | Hepatic disease          | circle         | blue   | Hepatic Inflammation                                                                                                                                                                 |

| 6 months $\beta_1$ Arg389 up-regulated |                        |                    |       |                                                       |
|----------------------------------------|------------------------|--------------------|-------|-------------------------------------------------------|
| Gene Symbol                            | Disease - General      | Geometrical symbol | Color | Disease - Specified                                   |
| ACTG2                                  | Cardiovascular disease | circle             | pink  | Cardiovascular Infarction,Cardiovascular Hypertrophy  |
| C6                                     | Cardiovascular disease | circle             | pink  | Cardiovascular Infarction,Cardiovascular Arteriopathy |

|          |                        |        |      |                                                                                                        |
|----------|------------------------|--------|------|--------------------------------------------------------------------------------------------------------|
| CD47     | Cardiovascular disease | circle | pink | Cardiovascular Infarction,Cardiovascular Arteriopathy                                                  |
| CD55     | Cardiovascular disease | circle | pink | Cardiovascular Infarction,Cardiovascular Arteriopathy                                                  |
| CYBA     | Cardiovascular disease | circle | pink | Cardiovascular Infarction                                                                              |
| CYBB     | Cardiovascular disease | circle | pink | Cardiovascular Infarction                                                                              |
| FSTL1    | Cardiovascular disease | circle | pink | Cardiovascular Infarction,Cardiovascular Necrosis/Cell Death                                           |
| GUCY1A3  | Cardiovascular disease | circle | pink | Cardiovascular Infarction,Cardiovascular Arteriopathy,Cardiovascular Hypertrophy                       |
| GUCY1B3  | Cardiovascular disease | circle | pink | Cardiovascular Infarction,Cardiovascular Arteriopathy                                                  |
| ITGAM    | Cardiovascular disease | circle | pink | Cardiovascular Infarction,Cardiovascular Arteriopathy                                                  |
| LRP1     | Cardiovascular disease | circle | pink | Cardiovascular Infarction,Cardiovascular Arteriopathy                                                  |
| LRP8     | Cardiovascular disease | circle | pink | Cardiovascular Infarction                                                                              |
| NCF2     | Cardiovascular disease | circle | pink | Cardiovascular Infarction                                                                              |
| POSTN    | Cardiovascular disease | circle | pink | Cardiovascular Infarction,Cardiovascular Arteriopathy,Cardiovascular Hypertrophy,Cardiovascular Damage |
| TSPO     | Cardiovascular disease | circle | pink | Cardiovascular Infarction                                                                              |
| VKORC1   | Cardiovascular disease | circle | pink | Cardiovascular Infarction,Cardiovascular Pulmonary Embolism                                            |
| ABI2     | Cardiovascular disease | circle | pink | Cardiovascular Arteriopathy                                                                            |
| ACBD3    | Cardiovascular disease | circle | pink | Cardiovascular Arteriopathy                                                                            |
| ADAM9    | Cardiovascular disease | circle | pink | Cardiovascular Arteriopathy                                                                            |
| ADAM19   | Cardiovascular disease | circle | pink | Cardiovascular Arteriopathy,Cardiovascular Stenosis                                                    |
| ADAMTS2  | Cardiovascular disease | circle | pink | Cardiovascular Arteriopathy                                                                            |
| ADAMTS12 | Cardiovascular disease | circle | pink | Cardiovascular Arteriopathy                                                                            |
| AFF3     | Cardiovascular disease | circle | pink | Cardiovascular Arteriopathy                                                                            |
| AKAP13   | Cardiovascular disease | circle | pink | Cardiovascular Arteriopathy                                                                            |
| ALDH18A1 | Cardiovascular disease | circle | pink | Cardiovascular Arteriopathy                                                                            |
| ALDH1A1  | Cardiovascular disease | circle | pink | Cardiovascular Arteriopathy                                                                            |
| ALG14    | Cardiovascular disease | circle | pink | Cardiovascular Arteriopathy                                                                            |
| ALOX5AP  | Cardiovascular disease | circle | pink | Cardiovascular Arteriopathy                                                                            |
| ANKRD27  | Cardiovascular disease | circle | pink | Cardiovascular Arteriopathy                                                                            |
| ANO6     | Cardiovascular disease | circle | pink | Cardiovascular Arteriopathy                                                                            |
| ANXA4    | Cardiovascular disease | circle | pink | Cardiovascular Arteriopathy                                                                            |
| ARHGAP25 | Cardiovascular disease | circle | pink | Cardiovascular Arteriopathy                                                                            |
| ARSB     | Cardiovascular disease | circle | pink | Cardiovascular Arteriopathy                                                                            |
| ASAH1    | Cardiovascular disease | circle | pink | Cardiovascular Arteriopathy                                                                            |
| ASAM     | Cardiovascular disease | circle | pink | Cardiovascular Arteriopathy                                                                            |
| ATP6V0D2 | Cardiovascular disease | circle | pink | Cardiovascular Arteriopathy                                                                            |
| ATP6V1H  | Cardiovascular disease | circle | pink | Cardiovascular Arteriopathy                                                                            |
| ATRNL1   | Cardiovascular         | circle | pink | Cardiovascular Arteriopathy                                                                            |

|          |                        |        |      |                             |
|----------|------------------------|--------|------|-----------------------------|
|          | disease                |        |      |                             |
| BCAT1    | Cardiovascular disease | circle | pink | Cardiovascular Arteriopathy |
| BDH2     | Cardiovascular disease | circle | pink | Cardiovascular Arteriopathy |
| BEND6    | Cardiovascular disease | circle | pink | Cardiovascular Arteriopathy |
| BIN1     | Cardiovascular disease | circle | pink | Cardiovascular Arteriopathy |
| BMPER    | Cardiovascular disease | circle | pink | Cardiovascular Arteriopathy |
| C14orf49 | Cardiovascular disease | circle | pink | Cardiovascular Arteriopathy |
| C9orf25  | Cardiovascular disease | circle | pink | Cardiovascular Arteriopathy |
| CADPS    | Cardiovascular disease | circle | pink | Cardiovascular Arteriopathy |
| CAMKK1   | Cardiovascular disease | circle | pink | Cardiovascular Arteriopathy |
| CAMTA1   | Cardiovascular disease | circle | pink | Cardiovascular Arteriopathy |
| CCDC50   | Cardiovascular disease | circle | pink | Cardiovascular Arteriopathy |
| CD302    | Cardiovascular disease | circle | pink | Cardiovascular Arteriopathy |
| CDK14    | Cardiovascular disease | circle | pink | Cardiovascular Arteriopathy |
| CDR2L    | Cardiovascular disease | circle | pink | Cardiovascular Arteriopathy |
| CERKL    | Cardiovascular disease | circle | pink | Cardiovascular Arteriopathy |
| CHN2     | Cardiovascular disease | circle | pink | Cardiovascular Arteriopathy |
| COL12A1  | Cardiovascular disease | circle | pink | Cardiovascular Arteriopathy |
| COL4A1   | Cardiovascular disease | circle | pink | Cardiovascular Arteriopathy |
| COL4A2   | Cardiovascular disease | circle | pink | Cardiovascular Arteriopathy |
| COL5A2   | Cardiovascular disease | circle | pink | Cardiovascular Arteriopathy |
| COLEC12  | Cardiovascular disease | circle | pink | Cardiovascular Arteriopathy |
| CORO7    | Cardiovascular disease | circle | pink | Cardiovascular Arteriopathy |
| CREB5    | Cardiovascular disease | circle | pink | Cardiovascular Arteriopathy |
| CRISPLD2 | Cardiovascular disease | circle | pink | Cardiovascular Arteriopathy |
| CTSH     | Cardiovascular disease | circle | pink | Cardiovascular Arteriopathy |
| CX3CR1   | Cardiovascular disease | circle | pink | Cardiovascular Arteriopathy |
| CYP20A1  | Cardiovascular disease | circle | pink | Cardiovascular Arteriopathy |
| CYP39A1  | Cardiovascular disease | circle | pink | Cardiovascular Arteriopathy |
| DCAF10   | Cardiovascular disease | circle | pink | Cardiovascular Arteriopathy |
| DDAH1    | Cardiovascular disease | circle | pink | Cardiovascular Arteriopathy |
| DDR2     | Cardiovascular disease | circle | pink | Cardiovascular Arteriopathy |
| DISP1    | Cardiovascular disease | circle | pink | Cardiovascular Arteriopathy |
| DOCK1    | Cardiovascular disease | circle | pink | Cardiovascular Arteriopathy |
| DOCK2    | Cardiovascular disease | circle | pink | Cardiovascular Arteriopathy |
| DOCK8    | Cardiovascular disease | circle | pink | Cardiovascular Arteriopathy |

|          |                        |        |      |                                                                                  |
|----------|------------------------|--------|------|----------------------------------------------------------------------------------|
| DPP3     | Cardiovascular disease | circle | pink | Cardiovascular Arteriopathy                                                      |
| DYNC2H1  | Cardiovascular disease | circle | pink | Cardiovascular Arteriopathy                                                      |
| EBF2     | Cardiovascular disease | circle | pink | Cardiovascular Arteriopathy                                                      |
| EFHA1    | Cardiovascular disease | circle | pink | Cardiovascular Arteriopathy                                                      |
| ELMO1    | Cardiovascular disease | circle | pink | Cardiovascular Arteriopathy                                                      |
| EPHA7    | Cardiovascular disease | circle | pink | Cardiovascular Arteriopathy                                                      |
| EVC2     | Cardiovascular disease | circle | pink | Cardiovascular Arteriopathy                                                      |
| F2R      | Cardiovascular disease | circle | pink | Cardiovascular Arteriopathy,Cardiovascular Dilatation,Cardiovascular Hypertrophy |
| FAM114A1 | Cardiovascular disease | circle | pink | Cardiovascular Arteriopathy                                                      |
| FAM129B  | Cardiovascular disease | circle | pink | Cardiovascular Arteriopathy                                                      |
| FAM13C   | Cardiovascular disease | circle | pink | Cardiovascular Arteriopathy                                                      |
| FBN2     | Cardiovascular disease | circle | pink | Cardiovascular Arteriopathy                                                      |
| FNDC1    | Cardiovascular disease | circle | pink | Cardiovascular Arteriopathy                                                      |
| FOXP1    | Cardiovascular disease | circle | pink | Cardiovascular Arteriopathy                                                      |
| FRMD4B   | Cardiovascular disease | circle | pink | Cardiovascular Arteriopathy                                                      |
| FXYD6    | Cardiovascular disease | circle | pink | Cardiovascular Arteriopathy                                                      |
| FYB      | Cardiovascular disease | circle | pink | Cardiovascular Arteriopathy                                                      |
| GAS7     | Cardiovascular disease | circle | pink | Cardiovascular Arteriopathy                                                      |
| GBE1     | Cardiovascular disease | circle | pink | Cardiovascular Arteriopathy                                                      |
| GLI3     | Cardiovascular disease | circle | pink | Cardiovascular Arteriopathy                                                      |
| GLIPR2   | Cardiovascular disease | circle | pink | Cardiovascular Arteriopathy                                                      |
| GM2A     | Cardiovascular disease | circle | pink | Cardiovascular Arteriopathy                                                      |
| GOSR2    | Cardiovascular disease | circle | pink | Cardiovascular Arteriopathy                                                      |
| GPC6     | Cardiovascular disease | circle | pink | Cardiovascular Arteriopathy                                                      |
| GRK5     | Cardiovascular disease | circle | pink | Cardiovascular Arteriopathy                                                      |
| HDGFRP3  | Cardiovascular disease | circle | pink | Cardiovascular Arteriopathy                                                      |
| HIP1     | Cardiovascular disease | circle | pink | Cardiovascular Arteriopathy                                                      |
| HSD17B12 | Cardiovascular disease | circle | pink | Cardiovascular Arteriopathy                                                      |
| IKBIP    | Cardiovascular disease | circle | pink | Cardiovascular Arteriopathy                                                      |
| IL33     | Cardiovascular disease | circle | pink | Cardiovascular Arteriopathy,Cardiovascular Hypertrophy                           |
| IL17RA   | Cardiovascular disease | circle | pink | Cardiovascular Arteriopathy                                                      |
| ITIH5    | Cardiovascular disease | circle | pink | Cardiovascular Arteriopathy                                                      |
| ITPK1    | Cardiovascular disease | circle | pink | Cardiovascular Arteriopathy                                                      |
| KCNMA1   | Cardiovascular disease | circle | pink | Cardiovascular Arteriopathy                                                      |
| KCNN3    | Cardiovascular disease | circle | pink | Cardiovascular Arteriopathy                                                      |
| KCNQ5    | Cardiovascular         | circle | pink | Cardiovascular Arteriopathy                                                      |

|         |                        |        |      |                                                                |
|---------|------------------------|--------|------|----------------------------------------------------------------|
|         | disease                |        |      |                                                                |
| LASS6   | Cardiovascular disease | circle | pink | Cardiovascular Arteriopathy                                    |
| LGMN    | Cardiovascular disease | circle | pink | Cardiovascular Arteriopathy                                    |
| LPIN2   | Cardiovascular disease | circle | pink | Cardiovascular Arteriopathy                                    |
| LRRK1   | Cardiovascular disease | circle | pink | Cardiovascular Arteriopathy                                    |
| MAMDC2  | Cardiovascular disease | circle | pink | Cardiovascular Arteriopathy                                    |
| MAML2   | Cardiovascular disease | circle | pink | Cardiovascular Arteriopathy                                    |
| MAN2A1  | Cardiovascular disease | circle | pink | Cardiovascular Arteriopathy                                    |
| MAP4    | Cardiovascular disease | circle | pink | Cardiovascular Arteriopathy                                    |
| MATN2   | Cardiovascular disease | circle | pink | Cardiovascular Arteriopathy                                    |
| MED15   | Cardiovascular disease | circle | pink | Cardiovascular Arteriopathy                                    |
| MICAL2  | Cardiovascular disease | circle | pink | Cardiovascular Arteriopathy                                    |
| MSR1    | Cardiovascular disease | circle | pink | Cardiovascular Arteriopathy                                    |
| MYH10   | Cardiovascular disease | circle | pink | Cardiovascular Arteriopathy                                    |
| MYO1D   | Cardiovascular disease | circle | pink | Cardiovascular Arteriopathy                                    |
| MYRIP   | Cardiovascular disease | circle | pink | Cardiovascular Arteriopathy                                    |
| NCOA7   | Cardiovascular disease | circle | pink | Cardiovascular Arteriopathy                                    |
| NRG1    | Cardiovascular disease | circle | pink | Cardiovascular Arteriopathy,Cardiovascular Necrosis/Cell Death |
| P2RY6   | Cardiovascular disease | circle | pink | Cardiovascular Arteriopathy                                    |
| PAMR1   | Cardiovascular disease | circle | pink | Cardiovascular Arteriopathy                                    |
| PAR3B   | Cardiovascular disease | circle | pink | Cardiovascular Arteriopathy                                    |
| PARVA   | Cardiovascular disease | circle | pink | Cardiovascular Arteriopathy                                    |
| PBX3    | Cardiovascular disease | circle | pink | Cardiovascular Arteriopathy,Cardiovascular Hypertrophy         |
| PDE10A  | Cardiovascular disease | circle | pink | Cardiovascular Arteriopathy                                    |
| PDE1A   | Cardiovascular disease | circle | pink | Cardiovascular Arteriopathy                                    |
| PEAK1   | Cardiovascular disease | circle | pink | Cardiovascular Arteriopathy                                    |
| PGCP    | Cardiovascular disease | circle | pink | Cardiovascular Arteriopathy                                    |
| PHGDH   | Cardiovascular disease | circle | pink | Cardiovascular Arteriopathy                                    |
| PLA2G7  | Cardiovascular disease | circle | pink | Cardiovascular Arteriopathy                                    |
| PLCB1   | Cardiovascular disease | circle | pink | Cardiovascular Arteriopathy,Cardiovascular Hypertrophy         |
| PLCG2   | Cardiovascular disease | circle | pink | Cardiovascular Arteriopathy                                    |
| PLD1    | Cardiovascular disease | circle | pink | Cardiovascular Arteriopathy                                    |
| PLXDC2  | Cardiovascular disease | circle | pink | Cardiovascular Arteriopathy                                    |
| PMEPA1  | Cardiovascular disease | circle | pink | Cardiovascular Arteriopathy                                    |
| PON2    | Cardiovascular disease | circle | pink | Cardiovascular Arteriopathy                                    |
| PPFIBP1 | Cardiovascular disease | circle | pink | Cardiovascular Arteriopathy                                    |

|          |                        |        |      |                                                                                                                                                                         |
|----------|------------------------|--------|------|-------------------------------------------------------------------------------------------------------------------------------------------------------------------------|
| PREX1    | Cardiovascular disease | circle | pink | Cardiovascular Arteriopathy                                                                                                                                             |
| QSOX1    | Cardiovascular disease | circle | pink | Cardiovascular Arteriopathy                                                                                                                                             |
| RAD51L1  | Cardiovascular disease | circle | pink | Cardiovascular Arteriopathy                                                                                                                                             |
| RAPH1    | Cardiovascular disease | circle | pink | Cardiovascular Arteriopathy                                                                                                                                             |
| RBM47    | Cardiovascular disease | circle | pink | Cardiovascular Arteriopathy                                                                                                                                             |
| RBMS3    | Cardiovascular disease | circle | pink | Cardiovascular Arteriopathy                                                                                                                                             |
| ROBO1    | Cardiovascular disease | circle | pink | Cardiovascular Arteriopathy                                                                                                                                             |
| RYR3     | Cardiovascular disease | circle | pink | Cardiovascular Arteriopathy                                                                                                                                             |
| SAMD4A   | Cardiovascular disease | circle | pink | Cardiovascular Arteriopathy                                                                                                                                             |
| SCN7A    | Cardiovascular disease | circle | pink | Cardiovascular Arteriopathy                                                                                                                                             |
| SEMA3C   | Cardiovascular disease | circle | pink | Cardiovascular Arteriopathy                                                                                                                                             |
| SEPN1    | Cardiovascular disease | circle | pink | Cardiovascular Arteriopathy                                                                                                                                             |
| SERPINE1 | Cardiovascular disease | circle | pink | Cardiovascular Arteriopathy,Cardiovascular Dilatation,Cardiovascular Hypertrophy,Cardiovascular Dysfunction,Cardiovascular Fibrosis,Heart Failure,Cardiovascular Damage |
| SETBP1   | Cardiovascular disease | circle | pink | Cardiovascular Arteriopathy                                                                                                                                             |
| SHROOM3  | Cardiovascular disease | circle | pink | Cardiovascular Arteriopathy                                                                                                                                             |
| SLC1A1   | Cardiovascular disease | circle | pink | Cardiovascular Arteriopathy                                                                                                                                             |
| SLC1A2   | Cardiovascular disease | circle | pink | Cardiovascular Arteriopathy                                                                                                                                             |
| SLC2A13  | Cardiovascular disease | circle | pink | Cardiovascular Arteriopathy                                                                                                                                             |
| SLC37A2  | Cardiovascular disease | circle | pink | Cardiovascular Arteriopathy                                                                                                                                             |
| SLIT3    | Cardiovascular disease | circle | pink | Cardiovascular Arteriopathy                                                                                                                                             |
| SNX7     | Cardiovascular disease | circle | pink | Cardiovascular Arteriopathy                                                                                                                                             |
| SNX29    | Cardiovascular disease | circle | pink | Cardiovascular Arteriopathy                                                                                                                                             |
| SOX5     | Cardiovascular disease | circle | pink | Cardiovascular Arteriopathy                                                                                                                                             |
| SPATS2   | Cardiovascular disease | circle | pink | Cardiovascular Arteriopathy                                                                                                                                             |
| SPON1    | Cardiovascular disease | circle | pink | Cardiovascular Arteriopathy                                                                                                                                             |
| SRBD1    | Cardiovascular disease | circle | pink | Cardiovascular Arteriopathy                                                                                                                                             |
| SRGAP3   | Cardiovascular disease | circle | pink | Cardiovascular Arteriopathy                                                                                                                                             |
| STK32B   | Cardiovascular disease | circle | pink | Cardiovascular Arteriopathy                                                                                                                                             |
| SYK      | Cardiovascular disease | circle | pink | Cardiovascular Arteriopathy                                                                                                                                             |
| TNFAIP6  | Cardiovascular disease | circle | pink | Cardiovascular Arteriopathy                                                                                                                                             |
| TNS3     | Cardiovascular disease | circle | pink | Cardiovascular Arteriopathy                                                                                                                                             |
| TPCN2    | Cardiovascular disease | circle | pink | Cardiovascular Arteriopathy                                                                                                                                             |
| TRIM44   | Cardiovascular disease | circle | pink | Cardiovascular Arteriopathy                                                                                                                                             |
| TSPAN9   | Cardiovascular disease | circle | pink | Cardiovascular Arteriopathy                                                                                                                                             |
| TTC9     | Cardiovascular disease | circle | pink | Cardiovascular Arteriopathy                                                                                                                                             |



|         |                        |        |      |                                                                                       |
|---------|------------------------|--------|------|---------------------------------------------------------------------------------------|
| UHRF1   | Cardiovascular disease | circle | pink | Cardiovascular Arteriopathy                                                           |
| UNC13B  | Cardiovascular disease | circle | pink | Cardiovascular Arteriopathy                                                           |
| VAV3    | Cardiovascular disease | circle | pink | Cardiovascular Arteriopathy                                                           |
| XYLT1   | Cardiovascular disease | circle | pink | Cardiovascular Arteriopathy                                                           |
| ZMIZ1   | Cardiovascular disease | circle | pink | Cardiovascular Arteriopathy                                                           |
| ELN     | Cardiovascular disease | circle | pink | Cardiovascular Stenosis,Cardiovascular Hypertrophy                                    |
| LRP5    | Cardiovascular disease | circle | pink | Cardiovascular Stenosis                                                               |
| MMP3    | Cardiovascular disease | circle | pink | Cardiovascular Stenosis                                                               |
| RUNX2   | Cardiovascular disease | circle | pink | Cardiovascular Stenosis                                                               |
| SOX9    | Cardiovascular disease | circle | pink | Cardiovascular Stenosis                                                               |
| TIMP2   | Cardiovascular disease | circle | pink | Cardiovascular Stenosis,Cardiovascular Necrosis/Cell Death                            |
| GAB2    | Cardiovascular disease | circle | pink | Cardiovascular Dilation                                                               |
| GPX1    | Cardiovascular disease | circle | pink | Cardiovascular Dilation                                                               |
| PTGES   | Cardiovascular disease | circle | pink | Cardiovascular Dilation,Cardiovascular Hypertrophy                                    |
| SLC2A1  | Cardiovascular disease | circle | pink | Cardiovascular Dilation                                                               |
| CSK     | Cardiovascular disease | circle | pink | Cardiovascular Necrosis/Cell Death                                                    |
| GSN     | Cardiovascular disease | circle | pink | Cardiovascular Necrosis/Cell Death                                                    |
| MANF    | Cardiovascular disease | circle | pink | Cardiovascular Necrosis/Cell Death                                                    |
| MAOA    | Cardiovascular disease | circle | pink | Cardiovascular Necrosis/Cell Death                                                    |
| MTPN    | Cardiovascular disease | circle | pink | Cardiovascular Necrosis/Cell Death,Cardiovascular Hypertrophy                         |
| NOL3    | Cardiovascular disease | circle | pink | Cardiovascular Necrosis/Cell Death                                                    |
| PRKCB   | Cardiovascular disease | circle | pink | Cardiovascular Necrosis/Cell Death,Cardiovascular Hypertrophy,Cardiovascular Fibrosis |
| PTH1R   | Cardiovascular disease | circle | pink | Cardiovascular Necrosis/Cell Death                                                    |
| PTK2B   | Cardiovascular disease | circle | pink | Cardiovascular Necrosis/Cell Death                                                    |
| PTN     | Cardiovascular disease | circle | pink | Cardiovascular Necrosis/Cell Death                                                    |
| SPRR1A  | Cardiovascular disease | circle | pink | Cardiovascular Necrosis/Cell Death                                                    |
| TNFAIP3 | Cardiovascular disease | circle | pink | Cardiovascular Necrosis/Cell Death,Cardiovascular Hypertrophy                         |
| ZYX     | Cardiovascular disease | circle | pink | Cardiovascular Necrosis/Cell Death                                                    |
| BMX     | Cardiovascular disease | circle | pink | Cardiovascular Hypertrophy                                                            |
| MYH7    | Cardiovascular disease | circle | pink | Cardiovascular Hypertrophy                                                            |
| PLA2G4A | Cardiovascular disease | circle | pink | Cardiovascular Hypertrophy                                                            |
| RCAN1   | Cardiovascular disease | circle | pink | Cardiovascular Hypertrophy                                                            |
| DES     | Cardiovascular disease | circle | pink | Cardiovascular Hypertrophy                                                            |
| GLA     | Cardiovascular disease | circle | pink | Cardiovascular Hypertrophy                                                            |
| GNAI2   | Cardiovascular disease | circle | pink | Cardiovascular Hypertrophy                                                            |
| HSPA1A  | Cardiovascular         | circle | pink | Cardiovascular Hypertrophy                                                            |

|          |                        |                |      |                                                                                                                                                                                                                                                                                                                         |
|----------|------------------------|----------------|------|-------------------------------------------------------------------------------------------------------------------------------------------------------------------------------------------------------------------------------------------------------------------------------------------------------------------------|
|          | disease                |                |      |                                                                                                                                                                                                                                                                                                                         |
| MAPK7    | Cardiovascular disease | circle         | pink | Cardiovascular Hypertrophy                                                                                                                                                                                                                                                                                              |
| NAB1     | Cardiovascular disease | circle         | pink | Cardiovascular Hypertrophy                                                                                                                                                                                                                                                                                              |
| NFATC4   | Cardiovascular disease | circle         | pink | Cardiovascular Hypertrophy                                                                                                                                                                                                                                                                                              |
| PIK3CG   | Cardiovascular disease | circle         | pink | Cardiovascular Hypertrophy                                                                                                                                                                                                                                                                                              |
| PRKCD    | Cardiovascular disease | circle         | pink | Cardiovascular Hypertrophy                                                                                                                                                                                                                                                                                              |
| CMKLR1   | Cardiovascular disease | circle         | pink | Cardiovascular Hypertrophy                                                                                                                                                                                                                                                                                              |
| CTSC     | Cardiovascular disease | circle         | pink | Cardiovascular Hypertrophy                                                                                                                                                                                                                                                                                              |
| DNAJC3   | Cardiovascular disease | circle         | pink | Cardiovascular Hypertrophy                                                                                                                                                                                                                                                                                              |
| GPX3     | Cardiovascular disease | circle         | pink | Cardiovascular Hypertrophy                                                                                                                                                                                                                                                                                              |
| S100A6   | Cardiovascular disease | circle         | pink | Cardiovascular Hypertrophy                                                                                                                                                                                                                                                                                              |
| SHC1     | Cardiovascular disease | circle         | pink | Cardiovascular Hypertrophy                                                                                                                                                                                                                                                                                              |
| VWF      | Cardiovascular disease | circle         | pink | Heart Failure                                                                                                                                                                                                                                                                                                           |
| SERPING1 | Cardiovascular disease | circle         | pink | Cardiovascular Damage                                                                                                                                                                                                                                                                                                   |
| ACE      | complex                | Rounded square | gray | Cardiovascular Infarction,Cardiovascular Arteriopathy,Renal Nephritis,Renal Damage,Cardiovascular Hypertrophy,Renal Failure,Hepatic Cirrhosis                                                                                                                                                                           |
| ADRB1    | complex                | Rounded square | gray | Cardiovascular Infarction,Cardiovascular Necrosis/Cell Death,Pulmonary Hypertension,Cardiovascular Hypertrophy,Cardiovascular Dysfunction,Hepatic Cirrhosis                                                                                                                                                             |
| APOE     | complex                | Rounded square | gray | Cardiovascular Infarction,Renal Tubule Injury,Cardiovascular Arteriopathy,Renal Necrosis/Cell Death,Renal Damage,Hepatic Necrosis/Cell Death,Glomerular Injury,Pulmonary Hypertension,Renal Proliferation,Cardiovascular Hypertrophy,Hepatic Steatosis                                                                  |
| CD14     | complex                | Rounded square | gray | Cardiovascular Infarction,Cardiovascular Arteriopathy,Hepatic Hepatitis,Hepatic Steatosis,Hepatic Steatohepatitis                                                                                                                                                                                                       |
| COL3A1   | complex                | Rounded square | gray | Cardiovascular Infarction,Renal Tubule Injury                                                                                                                                                                                                                                                                           |
| CSF1     | complex                | Rounded square | gray | Cardiovascular Infarction,Renal Tubule Injury,Renal Damage,Cardiovascular Dysfunction                                                                                                                                                                                                                                   |
| CSF1R    | complex                | Rounded square | gray | Cardiovascular Infarction,Hepatocellular Carcinoma                                                                                                                                                                                                                                                                      |
| CXCR4    | complex                | Rounded square | gray | Cardiovascular Infarction,Renal Tubule Injury                                                                                                                                                                                                                                                                           |
| HGF      | complex                | Rounded square | gray | Cardiovascular Infarction,Renal Tubule Injury,Cardiovascular Arteriopathy,Renal Necrosis/Cell Death,Renal Damage,Hepatic Proliferation,Hepatic Regeneration,Cardiovascular Necrosis/Cell Death,Renal Inflammation,Renal Proliferation,Hepatocellular Carcinoma,Hepatic Hepatitis,Hepatic Hyperplasia/Hyperproliferation |
| HMGCR    | complex                | Rounded square | gray | Cardiovascular Infarction,Cardiovascular Arteriopathy,Cardiovascular Stenosis,Pulmonary Hypertension,Hepatic Hepatitis,Hepatic Cirrhosis                                                                                                                                                                                |
| ITGB2    | complex                | Rounded square | gray | Cardiovascular Infarction,Cardiovascular Arteriopathy,Hepatic Necrosis/Cell Death,Hepatic Damage,Cardiovascular Damage                                                                                                                                                                                                  |
| NPPB     | complex                | Rounded square | gray | Cardiovascular Infarction,Pulmonary Hypertension,Cardiovascular Pulmonary Embolism                                                                                                                                                                                                                                      |
| PLAT     | complex                | Rounded square | gray | Cardiovascular Infarction,Renal Damage,Cardiovascular Pulmonary Embolism                                                                                                                                                                                                                                                |
| SELP     | complex                | Rounded square | gray | Cardiovascular Infarction,Cardiovascular Arteriopathy,Renal Nephritis,Renal Damage                                                                                                                                                                                                                                      |
| TLR2     | complex                | Rounded square | gray | Cardiovascular Infarction,Renal Tubule Injury,Renal Nephritis,Renal Necrosis/Cell Death,Renal Damage,Renal Inflammation,Hepatic Damage,Renal Thrombosis                                                                                                                                                                 |
| ABCA1    | complex                | Rounded square | gray | Cardiovascular Arteriopathy,Renal Nephritis                                                                                                                                                                                                                                                                             |
| BCL2     | complex                | Rounded square | gray | Cardiovascular Arteriopathy,Renal Nephritis,Renal Necrosis/Cell Death,Hepatic Necrosis/Cell Death,Hepatic Proliferation,Cardiovascular Necrosis/Cell Death,Cardiovascular Hypertrophy,Hepatocellular Carcinoma                                                                                                          |
| COL5A1   | complex                | Rounded square | gray | Renal Tubule Injury,Cardiovascular Arteriopathy                                                                                                                                                                                                                                                                         |
| EGFR     | complex                | Rounded        | gray | Cardiovascular Arteriopathy,Hepatic Necrosis/Cell Death,Renal                                                                                                                                                                                                                                                           |

|        |         |                |      |                                                                                                                                                                                                                                                                                                       |
|--------|---------|----------------|------|-------------------------------------------------------------------------------------------------------------------------------------------------------------------------------------------------------------------------------------------------------------------------------------------------------|
|        |         | square         |      | Proliferation,Cardiovascular Hypertrophy,Hepatocellular Carcinoma                                                                                                                                                                                                                                     |
| HBEGF  | complex | Rounded square | gray | Renal Tubule Injury,Cardiovascular Arteriopathy,Renal Nephritis,Renal Damage,Glomerular Injury,Cardiovascular Dilatation,Cardiovascular Hypertrophy                                                                                                                                                   |
| ICAM1  | complex | Rounded square | gray | Renal Tubule Injury,Cardiovascular Arteriopathy,Renal Nephritis,Renal Necrosis/Cell Death,Renal Damage,Cardiovascular Stenosis                                                                                                                                                                        |
| IL1R1  | complex | Rounded square | gray | Cardiovascular Arteriopathy,Hepatic Damage                                                                                                                                                                                                                                                            |
| LBP    | complex | Rounded square | gray | Cardiovascular Arteriopathy,Hepatic Steatosis                                                                                                                                                                                                                                                         |
| LDLR   | complex | Rounded square | gray | Cardiovascular Arteriopathy,Cardiovascular Stenosis,Renal Failure                                                                                                                                                                                                                                     |
| NOX4   | complex | Rounded square | gray | Cardiovascular Arteriopathy,Renal Hypertrophy                                                                                                                                                                                                                                                         |
| NPR3   | complex | Rounded square | gray | Cardiovascular Arteriopathy,Renal Failure                                                                                                                                                                                                                                                             |
| P2RX7  | complex | Rounded square | gray | Cardiovascular Arteriopathy,Hepatic Damage                                                                                                                                                                                                                                                            |
| PDE3B  | complex | Rounded square | gray | Cardiovascular Arteriopathy,Renal Nephritis,Nephrosis,Renal Failure,Hepatic Hepatitis,Hepatic Steatosis,Hepatic Steatohepatitis                                                                                                                                                                       |
| PDE5A  | complex | Rounded square | gray | Cardiovascular Arteriopathy,Renal Nephritis,Nephrosis,Pulmonary Hypertension,Renal Failure,Hepatic Hepatitis,Hepatic Steatosis,Hepatic Steatohepatitis                                                                                                                                                |
| PDE7B  | complex | Rounded square | gray | Cardiovascular Arteriopathy,Renal Nephritis,Nephrosis,Renal Failure,Hepatic Hepatitis,Hepatic Steatosis,Hepatic Steatohepatitis                                                                                                                                                                       |
| PDE8A  | complex | Rounded square | gray | Cardiovascular Arteriopathy,Renal Nephritis,Nephrosis,Renal Failure,Hepatic Hepatitis,Hepatic Steatosis,Hepatic Steatohepatitis                                                                                                                                                                       |
| SIRPA  | complex | Rounded square | gray | Cardiovascular Arteriopathy,Hepatic Steatosis                                                                                                                                                                                                                                                         |
| TGFB1  | complex | Rounded square | gray | Cardiovascular Arteriopathy,Renal Nephritis,Renal Necrosis/Cell Death,Renal Damage,Hepatic Necrosis/Cell Death,Hepatic Proliferation,Glomerular Injury,Hepatic Cirrhosis,Renal Hypertrophy                                                                                                            |
| THBS1  | complex | Rounded square | gray | Renal Tubule Injury,Cardiovascular Arteriopathy,Renal Damage,Renal Failure                                                                                                                                                                                                                            |
| TLR4   | complex | Rounded square | gray | Renal Tubule Injury,Cardiovascular Arteriopathy,Renal Nephritis,Renal Necrosis/Cell Death,Renal Damage,Hepatic Necrosis/Cell Death,Hepatic Regeneration,Cardiovascular Necrosis/Cell Death,Renal Failure,Hepatic Damage,Hepatic Hepatitis,Hepatic Cirrhosis,Hepatic Steatosis,Hepatic Steatohepatitis |
| MMP2   | complex | Rounded square | gray | Cardiovascular Stenosis,Cardiovascular Necrosis/Cell Death,Renal Failure                                                                                                                                                                                                                              |
| NPPA   | complex | Rounded square | gray | Renal Tubule Injury,Renal Necrosis/Cell Death,Renal Damage,Cardiovascular Stenosis,Cardiovascular Necrosis/Cell Death,Cardiovascular Hypertrophy                                                                                                                                                      |
| TIMP1  | complex | Rounded square | gray | Renal Tubule Injury,Hepatic Necrosis/Cell Death,Cardiovascular Stenosis,Cardiovascular Dilatation,Cardiovascular Hypertrophy,Cardiovascular Dysfunction,Cardiovascular Fibrosis,Hepatic Hepatitis,Hepatic Hyperplasia/Hyperproliferation                                                              |
| VCAM1  | complex | Rounded square | gray | Renal Nephritis,Cardiovascular Stenosis                                                                                                                                                                                                                                                               |
| BGN    | complex | Rounded square | gray | Renal Necrosis/Cell Death,Cardiovascular Dilatation,Renal Proliferation,Cardiovascular Damage                                                                                                                                                                                                         |
| LMNA   | complex | Rounded square | gray | Cardiovascular Dilatation,Hepatic Steatosis                                                                                                                                                                                                                                                           |
| NCF1   | complex | Rounded square | gray | Hepatic Necrosis/Cell Death,Cardiovascular Dilatation,Cardiovascular Hypertrophy,Hepatic Damage,Cardiovascular Dysfunction,Cardiovascular Fibrosis                                                                                                                                                    |
| PLCE1  | complex | Rounded square | gray | Cardiovascular Stenosis,Nephrosis,Cardiovascular Dilatation                                                                                                                                                                                                                                           |
| TGFBR2 | complex | Rounded square | gray | Hepatic Proliferation,Cardiovascular Dilatation,Hepatocellular Carcinoma,Cardiovascular Dysfunction                                                                                                                                                                                                   |
| CASP3  | complex | Rounded square | gray | Renal Necrosis/Cell Death,Hepatic Necrosis/Cell Death,Cardiovascular Necrosis/Cell Death,Hepatocellular Carcinoma,Hepatic Hepatitis                                                                                                                                                                   |
| HSPB1  | complex | Rounded square | gray | Renal Tubule Injury,Cardiovascular Necrosis/Cell Death                                                                                                                                                                                                                                                |
| IGF1   | complex | Rounded square | gray | Renal Tubule Injury,Renal Necrosis/Cell Death,Renal Damage,Hepatic Necrosis/Cell Death,Hepatic Proliferation,Cardiovascular Necrosis/Cell Death,Renal Inflammation,Renal Proliferation,Cardiovascular Hypertrophy,Cardiovascular Damage                                                               |
| IL6ST  | complex | Rounded square | gray | Hepatic Necrosis/Cell Death,Cardiovascular Necrosis/Cell Death                                                                                                                                                                                                                                        |
| MDK    | complex | Rounded square | gray | Renal Tubule Injury,Renal Damage,Cardiovascular Necrosis/Cell Death                                                                                                                                                                                                                                   |
| TP53   | complex | Rounded square | gray | Renal Nephritis,Hepatic Necrosis/Cell Death,Hepatic Proliferation,Cardiovascular Necrosis/Cell Death,Hepatocellular Carcinoma                                                                                                                                                                         |

|          |                          |                |       |                                                                                                                                                                                               |
|----------|--------------------------|----------------|-------|-----------------------------------------------------------------------------------------------------------------------------------------------------------------------------------------------|
| HIF1A    | complex                  | Rounded square | gray  | Cardiovascular Hypertrophy,Hepatocellular Carcinoma                                                                                                                                           |
| PTGS2    | complex                  | Rounded square | gray  | Renal Necrosis/Cell Death,Hepatic Necrosis/Cell Death,Hepatic Regeneration,Cardiovascular Hypertrophy,Renal Failure,Hepatic Damage,Hepatocellular Carcinoma,Cardiovascular Pulmonary Embolism |
| HMOX1    | complex                  | Rounded square | gray  | Hepatic Necrosis/Cell Death,Cardiovascular Hypertrophy,Renal Failure                                                                                                                          |
| MIF      | complex                  | Rounded square | gray  | Renal Damage,Pulmonary Hypertension,Cardiovascular Hypertrophy                                                                                                                                |
| NT5E     | complex                  | Rounded square | gray  | Cardiovascular Hypertrophy,Hepatic Damage                                                                                                                                                     |
| PDGFC    | complex                  | Rounded square | gray  | Cardiovascular Hypertrophy,Hepatocellular Carcinoma,Hepatic Steatosis                                                                                                                         |
| CTSB     | complex                  | Rounded square | gray  | Hepatic Necrosis/Cell Death,Cardiovascular Hypertrophy,Hepatic Damage                                                                                                                         |
| HCK      | complex                  | Rounded square | gray  | Renal Damage,Cardiovascular Hypertrophy,Hepatic Damage                                                                                                                                        |
| S100A10  | complex                  | Rounded square | gray  | Renal Tubule Injury,Cardiovascular Hypertrophy                                                                                                                                                |
| ITGB1    | complex                  | Rounded square | gray  | Renal Necrosis/Cell Death,Renal Damage,Nephrosis,Cardiovascular Fibrosis                                                                                                                      |
| NFKB1    | complex                  | Rounded square | gray  | Renal Inflammation,Cardiovascular Fibrosis                                                                                                                                                    |
| PTGS1    | complex                  | Rounded square | gray  | Hepatic Regeneration,Hepatocellular Carcinoma,Cardiovascular Pulmonary Embolism                                                                                                               |
| LGALS1   | complex                  | Rounded square | gray  | Renal Tubule Injury,Hepatic Proliferation                                                                                                                                                     |
| LGALS3   | complex                  | Rounded square | gray  | Renal Tubule Injury,Hepatic Proliferation,Glomerular Injury                                                                                                                                   |
| NGF      | complex                  | Rounded square | gray  | Renal Tubule Injury,Hepatic Necrosis/Cell Death                                                                                                                                               |
| IFNGR1   | complex                  | Rounded square | gray  | Renal Nephritis,Hepatic Cirrhosis                                                                                                                                                             |
| PTPRC    | complex                  | Rounded square | gray  | Renal Nephritis,Hepatic Necrosis/Cell Death,Hepatic Hepatitis                                                                                                                                 |
| TNFRSF1A | complex                  | Rounded square | gray  | Renal Nephritis,Hepatic Necrosis/Cell Death,Hepatic Proliferation,Renal Inflammation,Hepatic Damage,Hepatic Hepatitis,Hepatic Cirrhosis,Hepatic Steatosis,Hepatic Steatohepatitis             |
| CTGF     | complex                  | Rounded square | gray  | Renal Necrosis/Cell Death,Hepatic Adhesion                                                                                                                                                    |
| TNFRSF1B | complex                  | Rounded square | gray  | Renal Necrosis/Cell Death,Hepatic Necrosis/Cell Death,Hepatic Proliferation,Hepatic Damage,Hepatic Hepatitis                                                                                  |
| C3       | complex                  | Rounded square | gray  | Renal Damage,Hepatic Proliferation,Hepatic Regeneration,Glomerular Injury,Hepatic Damage,Hepatic Hyperplasia/Hyperproliferation                                                               |
| PDGFRB   | complex                  | Rounded square | gray  | Glomerular Injury,Pulmonary Hypertension,Renal Proliferation,Hepatocellular Carcinoma                                                                                                         |
| MYC      | complex                  | Rounded square | gray  | Hepatic Necrosis/Cell Death,Hepatic Proliferation,Hepatocellular Carcinoma,Hepatic Hyperplasia/Hyperproliferation                                                                             |
| PML      | complex                  | Rounded square | gray  | Hepatic Proliferation,Hepatocellular Carcinoma                                                                                                                                                |
| TUBA1A   | complex                  | Rounded square | gray  | Hepatocellular Carcinoma,Hepatic Cirrhosis                                                                                                                                                    |
| TUBA1C   | complex                  | Rounded square | gray  | Hepatocellular Carcinoma,Hepatic Cirrhosis                                                                                                                                                    |
| TUBB2A   | complex                  | Rounded square | gray  | Hepatocellular Carcinoma,Hepatic Cirrhosis                                                                                                                                                    |
| POLA1    | complex                  | Rounded square | gray  | Hepatocellular Carcinoma,Hepatic Hepatitis                                                                                                                                                    |
| FLT4     | complex                  | Rounded square | gray  | Pulmonary Hypertension,Hepatocellular Carcinoma                                                                                                                                               |
| PDGFRA   | complex                  | Rounded square | gray  | Pulmonary Hypertension,Hepatocellular Carcinoma                                                                                                                                               |
| ACTG1    | Hepatocellular Carcinoma | circle         | green | Hepatocellular Carcinoma                                                                                                                                                                      |
| FTL      | Hepatocellular Carcinoma | circle         | green | Hepatocellular Carcinoma                                                                                                                                                                      |
| HPSE     | Hepatocellular Carcinoma | circle         | green | Hepatocellular Carcinoma                                                                                                                                                                      |
| IQGAP1   | Hepatocellular Carcinoma | circle         | green | Hepatocellular Carcinoma                                                                                                                                                                      |
| PAK1     | Hepatocellular           | circle         | green | Hepatocellular Carcinoma                                                                                                                                                                      |

|          |                          |        |        |                                                                     |
|----------|--------------------------|--------|--------|---------------------------------------------------------------------|
|          | Carcinoma                |        |        |                                                                     |
| PDGFRL   | Hepatocellular Carcinoma | circle | green  | Hepatocellular Carcinoma                                            |
| SLIT2    | Hepatocellular Carcinoma | circle | green  | Hepatocellular Carcinoma                                            |
| TYMS     | Hepatocellular Carcinoma | circle | green  | Hepatocellular Carcinoma                                            |
| BCR      | Hypertension             | circle | olive  | Pulmonary Hypertension                                              |
| RRM2     | Hypertension             | circle | olive  | Pulmonary Hypertension                                              |
| BMP4     | Renal disease            | circle | purple | Renal Tubule Injury                                                 |
| CD24     | Renal disease            | circle | purple | Renal Tubule Injury                                                 |
| CP       | Renal disease            | circle | purple | Renal Tubule Injury                                                 |
| CTSS     | Renal disease            | circle | purple | Renal Tubule Injury                                                 |
| FASN     | Renal disease            | circle | purple | Renal Tubule Injury                                                 |
| FBN1     | Renal disease            | circle | purple | Renal Tubule Injury                                                 |
| FN1      | Renal disease            | circle | purple | Renal Tubule Injury,Glomerular Injury                               |
| G6PD     | Renal disease            | circle | purple | Renal Tubule Injury                                                 |
| GSS      | Renal disease            | circle | purple | Renal Tubule Injury                                                 |
| GSTA5    | Renal disease            | circle | purple | Renal Tubule Injury                                                 |
| HSP90AA1 | Renal disease            | circle | purple | Renal Tubule Injury                                                 |
| IGFBP5   | Renal disease            | circle | purple | Renal Tubule Injury                                                 |
| LYZ      | Renal disease            | circle | purple | Renal Tubule Injury                                                 |
| RAB7L1   | Renal disease            | circle | purple | Renal Tubule Injury                                                 |
| ST6GAL1  | Renal disease            | circle | purple | Renal Tubule Injury                                                 |
| TMSB4X   | Renal disease            | circle | purple | Renal Tubule Injury                                                 |
| TXNRD1   | Renal disease            | circle | purple | Renal Tubule Injury                                                 |
| YWHAH    | Renal disease            | circle | purple | Renal Tubule Injury                                                 |
| ACTN4    | Renal disease            | circle | purple | Renal Nephritis,Glomerular Injury                                   |
| C1QA     | Renal disease            | circle | purple | Renal Nephritis,Renal Damage,Renal Thrombosis                       |
| C4A      | Renal disease            | circle | purple | Renal Nephritis,Renal Damage                                        |
| CCR1     | Renal disease            | circle | purple | Renal Nephritis                                                     |
| CD80     | Renal disease            | circle | purple | Renal Nephritis                                                     |
| CD86     | Renal disease            | circle | purple | Renal Nephritis                                                     |
| CFH      | Renal disease            | circle | purple | Renal Nephritis,Renal Damage                                        |
| CXCL16   | Renal disease            | circle | purple | Renal Nephritis                                                     |
| FCGR2B   | Renal disease            | circle | purple | Renal Nephritis                                                     |
| IL16     | Renal disease            | circle | purple | Renal Nephritis                                                     |
| MFGE8    | Renal disease            | circle | purple | Renal Nephritis                                                     |
| NFKB2    | Renal disease            | circle | purple | Renal Nephritis                                                     |
| TGM2     | Renal disease            | circle | purple | Renal Nephritis                                                     |
| CASP12   | Renal disease            | circle | purple | Renal Necrosis/Cell Death                                           |
| DCN      | Renal disease            | circle | purple | Renal Necrosis/Cell Death                                           |
| ILK      | Renal disease            | circle | purple | Renal Necrosis/Cell Death,Renal Failure                             |
| CFB      | Renal disease            | circle | purple | Renal Damage,Renal Inflammation,Renal Failure,Renal Thrombosis      |
| FCGR1A   | Renal disease            | circle | purple | Renal Damage                                                        |
| ATP6V1A  | Renal disease            | circle | purple | Nephrosis                                                           |
| CLTC     | Renal disease            | circle | purple | Nephrosis                                                           |
| CST3     | Renal disease            | circle | purple | Nephrosis                                                           |
| GLIS2    | Renal disease            | circle | purple | Nephrosis                                                           |
| INVS     | Renal disease            | circle | purple | Nephrosis                                                           |
| ITGA1    | Renal disease            | circle | purple | Nephrosis,Glomerular Injury                                         |
| SYNPO    | Renal disease            | circle | purple | Nephrosis                                                           |
| FCER1G   | Renal disease            | circle | purple | Glomerular Injury,Renal Proliferation                               |
| GAS6     | Renal disease            | circle | purple | Glomerular Injury,Renal Proliferation                               |
| SPARC    | Renal disease            | circle | purple | Glomerular Injury,Renal Proliferation                               |
| AXL      | Renal disease            | circle | purple | Renal Proliferation                                                 |
| CCL21    | Renal disease            | circle | purple | Renal Proliferation                                                 |
| KIF3A    | Renal disease            | circle | purple | Renal Failure                                                       |
| AR       | Renal disease            | circle | purple | Renal Failure                                                       |
| RELB     | Renal disease            | circle | purple | Renal Inflammation                                                  |
| ARF6     | Hepatic disease          | circle | blue   | Hepatic Necrosis/Cell Death                                         |
| ASAH2    | Hepatic disease          | circle | blue   | Hepatic Necrosis/Cell Death                                         |
| CCND1    | Hepatic disease          | circle | blue   | Hepatic Necrosis/Cell Death,Hepatic Proliferation,Hepatic Steatosis |
| FGL2     | Hepatic disease          | circle | blue   | Hepatic Necrosis/Cell Death                                         |
| IRF5     | Hepatic disease          | circle | blue   | Hepatic Necrosis/Cell Death                                         |
| ITGAV    | Hepatic disease          | circle | blue   | Hepatic Necrosis/Cell Death,Hepatic Proliferation                   |
| PTPN1    | Hepatic disease          | circle | blue   | Hepatic Necrosis/Cell Death,Hepatic Damage                          |
| TNIP1    | Hepatic disease          | circle | blue   | Hepatic Necrosis/Cell Death                                         |
| C3AR1    | Hepatic disease          | circle | blue   | Hepatic Proliferation,Hepatic Regeneration                          |

|           |                 |        |      |                                                             |
|-----------|-----------------|--------|------|-------------------------------------------------------------|
| CEBPA     | Hepatic disease | circle | blue | Hepatic Proliferation                                       |
| IGF1R     | Hepatic disease | circle | blue | Hepatic Proliferation,Hepatic Hepatitis                     |
| SLC7A5    | Hepatic disease | circle | blue | Hepatic Proliferation                                       |
| TF        | Hepatic disease | circle | blue | Hepatic Proliferation,Hepatic Cirrhosis                     |
| TNFRSF12A | Hepatic disease | circle | blue | Hepatic Proliferation                                       |
| SAT1      | Hepatic disease | circle | blue | Hepatic Proliferation,Hepatic Regeneration                  |
| CD44      | Hepatic disease | circle | blue | Hepatic Damage,Hepatic Hepatitis                            |
| GCLC      | Hepatic disease | circle | blue | Hepatic Damage                                              |
| IL6R      | Hepatic disease | circle | blue | Hepatic Damage                                              |
| KRT18     | Hepatic disease | circle | blue | Hepatic Damage,Hepatic Cirrhosis                            |
| MT1E      | Hepatic disease | circle | blue | Hepatic Damage                                              |
| SDC4      | Hepatic disease | circle | blue | Hepatic Damage                                              |
| ABCC3     | Hepatic disease | circle | blue | Hepatic Cirrhosis                                           |
| LIPA      | Hepatic disease | circle | blue | Hepatic Steatosis                                           |
| PEMT      | Hepatic disease | circle | blue | Hepatic Hepatitis,Hepatic Steatosis,Hepatic Steatohepatitis |
| SCD       | Hepatic disease | circle | blue | Hepatic Steatosis                                           |
| SLC17A5   | Hepatic disease | circle | blue | Hepatic Steatosis                                           |
| ITGA5     | Hepatic disease | circle | blue | Hepatic Adhesion                                            |
| HDAC1     | Hepatic disease | circle | blue | Hepatic Proliferation                                       |
| TYROBP    | Hepatic disease | circle | blue | Hepatic Hepatitis                                           |

| 6 months $\beta_1$ Gly389 up-regulated |                        |                    |       |                                                                                                        |
|----------------------------------------|------------------------|--------------------|-------|--------------------------------------------------------------------------------------------------------|
| Gene Symbol                            | Disease - General      | Geometrical symbol | Color | Disease - Specified                                                                                    |
| ACTG2                                  | Cardiovascular disease | circle             | pink  | Cardiovascular Infarction,Cardiovascular Hypertrophy                                                   |
| C6                                     | Cardiovascular disease | circle             | pink  | Cardiovascular Infarction,Cardiovascular Arteriopathy                                                  |
| CD47                                   | Cardiovascular disease | circle             | pink  | Cardiovascular Infarction,Cardiovascular Arteriopathy                                                  |
| CD55                                   | Cardiovascular disease | circle             | pink  | Cardiovascular Infarction,Cardiovascular Arteriopathy                                                  |
| CD163                                  | Cardiovascular disease | circle             | pink  | Cardiovascular Infarction,Cardiovascular Arteriopathy                                                  |
| CYBA                                   | Cardiovascular disease | circle             | pink  | Cardiovascular Infarction                                                                              |
| CYBB                                   | Cardiovascular disease | circle             | pink  | Cardiovascular Infarction                                                                              |
| FSTL1                                  | Cardiovascular disease | circle             | pink  | Cardiovascular Infarction,Cardiovascular Necrosis/Cell Death                                           |
| ITGAM                                  | Cardiovascular disease | circle             | pink  | Cardiovascular Infarction,Cardiovascular Arteriopathy                                                  |
| LRP1                                   | Cardiovascular disease | circle             | pink  | Cardiovascular Infarction,Cardiovascular Arteriopathy                                                  |
| NCF2                                   | Cardiovascular disease | circle             | pink  | Cardiovascular Infarction                                                                              |
| POSTN                                  | Cardiovascular disease | circle             | pink  | Cardiovascular Infarction,Cardiovascular Hypertrophy,Cardiovascular Arteriopathy,Cardiovascular Damage |
| TSPO                                   | Cardiovascular disease | circle             | pink  | Cardiovascular Infarction                                                                              |
| VKORC1                                 | Cardiovascular disease | circle             | pink  | Cardiovascular Infarction                                                                              |
| GSN                                    | Cardiovascular disease | circle             | pink  | Cardiovascular Necrosis/Cell Death                                                                     |
| HTR2B                                  | Cardiovascular disease | circle             | pink  | Cardiovascular Necrosis/Cell Death,Cardiovascular Hypertrophy,Heart Failure                            |
| MANF                                   | Cardiovascular disease | circle             | pink  | Cardiovascular Necrosis/Cell Death                                                                     |
| MAOA                                   | Cardiovascular disease | circle             | pink  | Cardiovascular Necrosis/Cell Death                                                                     |
| MTPN                                   | Cardiovascular disease | circle             | pink  | Cardiovascular Necrosis/Cell Death,Cardiovascular Hypertrophy,Heart Failure                            |
| PRKCB                                  | Cardiovascular disease | circle             | pink  | Cardiovascular Necrosis/Cell Death,Cardiovascular Hypertrophy,Heart Failure,Cardiovascular Fibrosis    |
| PTK2B                                  | Cardiovascular disease | circle             | pink  | Cardiovascular Necrosis/Cell Death                                                                     |
| PTN                                    | Cardiovascular disease | circle             | pink  | Cardiovascular Necrosis/Cell Death                                                                     |

|          |                        |        |      |                                                            |
|----------|------------------------|--------|------|------------------------------------------------------------|
| SPRR1A   | Cardiovascular disease | circle | pink | Cardiovascular Necrosis/Cell Death                         |
| TIMP2    | Cardiovascular disease | circle | pink | Cardiovascular Necrosis/Cell Death,Cardiovascular Stenosis |
| TXNIP    | Cardiovascular disease | circle | pink | Cardiovascular Necrosis/Cell Death                         |
| ZYX      | Cardiovascular disease | circle | pink | Cardiovascular Necrosis/Cell Death                         |
| DES      | Cardiovascular disease | circle | pink | Cardiovascular Hypertrophy                                 |
| ELN      | Cardiovascular disease | circle | pink | Cardiovascular Hypertrophy,Cardiovascular Stenosis         |
| GLA      | Cardiovascular disease | circle | pink | Cardiovascular Hypertrophy                                 |
| GNAI2    | Cardiovascular disease | circle | pink | Cardiovascular Hypertrophy                                 |
| HSPA1A   | Cardiovascular disease | circle | pink | Cardiovascular Hypertrophy                                 |
| NAB1     | Cardiovascular disease | circle | pink | Cardiovascular Hypertrophy                                 |
| NFATC4   | Cardiovascular disease | circle | pink | Cardiovascular Hypertrophy                                 |
| PIK3CG   | Cardiovascular disease | circle | pink | Cardiovascular Hypertrophy,Heart Failure                   |
| PRKCD    | Cardiovascular disease | circle | pink | Cardiovascular Hypertrophy                                 |
| RCAN1    | Cardiovascular disease | circle | pink | Cardiovascular Hypertrophy                                 |
| ADAM9    | Cardiovascular disease | circle | pink | Cardiovascular Arteriopathy                                |
| ADAMTS2  | Cardiovascular disease | circle | pink | Cardiovascular Arteriopathy                                |
| AFF3     | Cardiovascular disease | circle | pink | Cardiovascular Arteriopathy                                |
| AKAP13   | Cardiovascular disease | circle | pink | Cardiovascular Arteriopathy                                |
| ALDH18A1 | Cardiovascular disease | circle | pink | Cardiovascular Arteriopathy                                |
| ALDH1A1  | Cardiovascular disease | circle | pink | Cardiovascular Arteriopathy                                |
| ALOX5AP  | Cardiovascular disease | circle | pink | Cardiovascular Arteriopathy                                |
| ANKRD27  | Cardiovascular disease | circle | pink | Cardiovascular Arteriopathy                                |
| ANO6     | Cardiovascular disease | circle | pink | Cardiovascular Arteriopathy                                |
| ANXA4    | Cardiovascular disease | circle | pink | Cardiovascular Arteriopathy                                |
| ARHGAP25 | Cardiovascular disease | circle | pink | Cardiovascular Arteriopathy                                |
| ARSB     | Cardiovascular disease | circle | pink | Cardiovascular Arteriopathy                                |
| ASAH1    | Cardiovascular disease | circle | pink | Cardiovascular Arteriopathy                                |
| ASAM     | Cardiovascular disease | circle | pink | Cardiovascular Arteriopathy                                |
| ATP6V1H  | Cardiovascular disease | circle | pink | Cardiovascular Arteriopathy                                |
| ATRNL1   | Cardiovascular disease | circle | pink | Cardiovascular Arteriopathy                                |
| BMPER    | Cardiovascular disease | circle | pink | Cardiovascular Arteriopathy                                |
| CD209    | Cardiovascular disease | circle | pink | Cardiovascular Arteriopathy                                |
| CD302    | Cardiovascular disease | circle | pink | Cardiovascular Arteriopathy                                |
| CDK14    | Cardiovascular disease | circle | pink | Cardiovascular Arteriopathy                                |
| COL12A1  | Cardiovascular disease | circle | pink | Cardiovascular Arteriopathy                                |
| COL4A2   | Cardiovascular         | circle | pink | Cardiovascular Arteriopathy                                |

|          |                        |        |      |                                                        |
|----------|------------------------|--------|------|--------------------------------------------------------|
|          | disease                |        |      |                                                        |
| COL5A2   | Cardiovascular disease | circle | pink | Cardiovascular Arteriopathy                            |
| COLEC12  | Cardiovascular disease | circle | pink | Cardiovascular Arteriopathy                            |
| CRISPLD2 | Cardiovascular disease | circle | pink | Cardiovascular Arteriopathy                            |
| CTNNAL1  | Cardiovascular disease | circle | pink | Cardiovascular Arteriopathy                            |
| CTSH     | Cardiovascular disease | circle | pink | Cardiovascular Arteriopathy                            |
| CYB5A    | Cardiovascular disease | circle | pink | Cardiovascular Arteriopathy                            |
| CYP20A1  | Cardiovascular disease | circle | pink | Cardiovascular Arteriopathy                            |
| CYP39A1  | Cardiovascular disease | circle | pink | Cardiovascular Arteriopathy                            |
| DCAF10   | Cardiovascular disease | circle | pink | Cardiovascular Arteriopathy                            |
| DDR2     | Cardiovascular disease | circle | pink | Cardiovascular Arteriopathy                            |
| DISP1    | Cardiovascular disease | circle | pink | Cardiovascular Arteriopathy                            |
| DOCK1    | Cardiovascular disease | circle | pink | Cardiovascular Arteriopathy                            |
| DOCK2    | Cardiovascular disease | circle | pink | Cardiovascular Arteriopathy                            |
| DPP3     | Cardiovascular disease | circle | pink | Cardiovascular Arteriopathy                            |
| DPP6     | Cardiovascular disease | circle | pink | Cardiovascular Arteriopathy                            |
| EBF2     | Cardiovascular disease | circle | pink | Cardiovascular Arteriopathy                            |
| ELMO1    | Cardiovascular disease | circle | pink | Cardiovascular Arteriopathy                            |
| EVC2     | Cardiovascular disease | circle | pink | Cardiovascular Arteriopathy                            |
| FAM114A1 | Cardiovascular disease | circle | pink | Cardiovascular Arteriopathy                            |
| FAM129B  | Cardiovascular disease | circle | pink | Cardiovascular Arteriopathy                            |
| FNDC1    | Cardiovascular disease | circle | pink | Cardiovascular Arteriopathy                            |
| FOXP1    | Cardiovascular disease | circle | pink | Cardiovascular Arteriopathy                            |
| FRMD4B   | Cardiovascular disease | circle | pink | Cardiovascular Arteriopathy                            |
| FXYP6    | Cardiovascular disease | circle | pink | Cardiovascular Arteriopathy                            |
| FYB      | Cardiovascular disease | circle | pink | Cardiovascular Arteriopathy                            |
| GAS7     | Cardiovascular disease | circle | pink | Cardiovascular Arteriopathy                            |
| GLI3     | Cardiovascular disease | circle | pink | Cardiovascular Arteriopathy                            |
| GLIPR2   | Cardiovascular disease | circle | pink | Cardiovascular Arteriopathy                            |
| GM2A     | Cardiovascular disease | circle | pink | Cardiovascular Arteriopathy                            |
| GPC6     | Cardiovascular disease | circle | pink | Cardiovascular Arteriopathy                            |
| GRK5     | Cardiovascular disease | circle | pink | Cardiovascular Arteriopathy                            |
| HIP1     | Cardiovascular disease | circle | pink | Cardiovascular Arteriopathy                            |
| IL33     | Cardiovascular disease | circle | pink | Cardiovascular Hypertrophy,Cardiovascular Arteriopathy |
| IL17RA   | Cardiovascular disease | circle | pink | Cardiovascular Arteriopathy                            |
| ITIH5    | Cardiovascular disease | circle | pink | Cardiovascular Arteriopathy                            |



|          |                        |        |      |                                                                                                                                                                         |
|----------|------------------------|--------|------|-------------------------------------------------------------------------------------------------------------------------------------------------------------------------|
| ITPK1    | Cardiovascular disease | circle | pink | Cardiovascular Arteriopathy                                                                                                                                             |
| KCNN3    | Cardiovascular disease | circle | pink | Cardiovascular Arteriopathy                                                                                                                                             |
| LASS6    | Cardiovascular disease | circle | pink | Cardiovascular Arteriopathy                                                                                                                                             |
| LGMN     | Cardiovascular disease | circle | pink | Cardiovascular Arteriopathy                                                                                                                                             |
| LPIN2    | Cardiovascular disease | circle | pink | Cardiovascular Arteriopathy                                                                                                                                             |
| LRRK1    | Cardiovascular disease | circle | pink | Cardiovascular Arteriopathy                                                                                                                                             |
| MAN2A1   | Cardiovascular disease | circle | pink | Cardiovascular Arteriopathy                                                                                                                                             |
| MAP4     | Cardiovascular disease | circle | pink | Cardiovascular Arteriopathy                                                                                                                                             |
| MATN2    | Cardiovascular disease | circle | pink | Cardiovascular Arteriopathy                                                                                                                                             |
| MED15    | Cardiovascular disease | circle | pink | Cardiovascular Arteriopathy                                                                                                                                             |
| MICAL2   | Cardiovascular disease | circle | pink | Cardiovascular Arteriopathy                                                                                                                                             |
| MSR1     | Cardiovascular disease | circle | pink | Cardiovascular Arteriopathy                                                                                                                                             |
| MYH10    | Cardiovascular disease | circle | pink | Cardiovascular Arteriopathy                                                                                                                                             |
| MYO1D    | Cardiovascular disease | circle | pink | Cardiovascular Arteriopathy                                                                                                                                             |
| NCOA7    | Cardiovascular disease | circle | pink | Cardiovascular Arteriopathy                                                                                                                                             |
| NOX4     | Cardiovascular disease | circle | pink | Cardiovascular Arteriopathy                                                                                                                                             |
| P2RY6    | Cardiovascular disease | circle | pink | Cardiovascular Arteriopathy                                                                                                                                             |
| PAMR1    | Cardiovascular disease | circle | pink | Cardiovascular Arteriopathy                                                                                                                                             |
| PBX3     | Cardiovascular disease | circle | pink | Cardiovascular Hypertrophy,Cardiovascular Arteriopathy                                                                                                                  |
| PDE1A    | Cardiovascular disease | circle | pink | Cardiovascular Arteriopathy                                                                                                                                             |
| PGCP     | Cardiovascular disease | circle | pink | Cardiovascular Arteriopathy                                                                                                                                             |
| PLA2G7   | Cardiovascular disease | circle | pink | Cardiovascular Arteriopathy                                                                                                                                             |
| PLCG2    | Cardiovascular disease | circle | pink | Cardiovascular Arteriopathy                                                                                                                                             |
| PLXDC2   | Cardiovascular disease | circle | pink | Cardiovascular Arteriopathy                                                                                                                                             |
| PMEPA1   | Cardiovascular disease | circle | pink | Cardiovascular Arteriopathy                                                                                                                                             |
| PON2     | Cardiovascular disease | circle | pink | Cardiovascular Arteriopathy                                                                                                                                             |
| QSOX1    | Cardiovascular disease | circle | pink | Cardiovascular Arteriopathy                                                                                                                                             |
| RAD51L1  | Cardiovascular disease | circle | pink | Cardiovascular Arteriopathy                                                                                                                                             |
| RBMS3    | Cardiovascular disease | circle | pink | Cardiovascular Arteriopathy                                                                                                                                             |
| ROBO1    | Cardiovascular disease | circle | pink | Cardiovascular Arteriopathy                                                                                                                                             |
| SCN7A    | Cardiovascular disease | circle | pink | Cardiovascular Arteriopathy                                                                                                                                             |
| SELE     | Cardiovascular disease | circle | pink | Cardiovascular Arteriopathy,Cardiovascular Stenosis                                                                                                                     |
| SEMA3C   | Cardiovascular disease | circle | pink | Cardiovascular Arteriopathy                                                                                                                                             |
| SEPN1    | Cardiovascular disease | circle | pink | Cardiovascular Arteriopathy                                                                                                                                             |
| SERPINE1 | Cardiovascular disease | circle | pink | Cardiovascular Hypertrophy,Cardiovascular Arteriopathy,Cardiovascular Damage,Cardiovascular Dilatation,Heart Failure,Cardiovascular Dysfunction,Cardiovascular Fibrosis |

|          |                        |                |      |                                                                                                                                                             |
|----------|------------------------|----------------|------|-------------------------------------------------------------------------------------------------------------------------------------------------------------|
| SH3GL2   | Cardiovascular disease | circle         | pink | Cardiovascular Arteriopathy                                                                                                                                 |
| SHROOM3  | Cardiovascular disease | circle         | pink | Cardiovascular Arteriopathy                                                                                                                                 |
| SLC37A2  | Cardiovascular disease | circle         | pink | Cardiovascular Arteriopathy                                                                                                                                 |
| SLIT3    | Cardiovascular disease | circle         | pink | Cardiovascular Arteriopathy                                                                                                                                 |
| SNX7     | Cardiovascular disease | circle         | pink | Cardiovascular Arteriopathy                                                                                                                                 |
| SOX5     | Cardiovascular disease | circle         | pink | Cardiovascular Arteriopathy                                                                                                                                 |
| STK32B   | Cardiovascular disease | circle         | pink | Cardiovascular Arteriopathy                                                                                                                                 |
| SYK      | Cardiovascular disease | circle         | pink | Cardiovascular Arteriopathy                                                                                                                                 |
| TNFAIP6  | Cardiovascular disease | circle         | pink | Cardiovascular Arteriopathy                                                                                                                                 |
| TNS3     | Cardiovascular disease | circle         | pink | Cardiovascular Arteriopathy                                                                                                                                 |
| TPCN2    | Cardiovascular disease | circle         | pink | Cardiovascular Arteriopathy                                                                                                                                 |
| UNC13B   | Cardiovascular disease | circle         | pink | Cardiovascular Arteriopathy                                                                                                                                 |
| XYLT1    | Cardiovascular disease | circle         | pink | Cardiovascular Arteriopathy                                                                                                                                 |
| SERPING1 | Cardiovascular disease | circle         | pink | Cardiovascular Damage                                                                                                                                       |
| GAB2     | Cardiovascular disease | circle         | pink | Cardiovascular Dilatation,Heart Failure                                                                                                                     |
| GPX1     | Cardiovascular disease | circle         | pink | Cardiovascular Dilatation                                                                                                                                   |
| SLC2A1   | Cardiovascular disease | circle         | pink | Cardiovascular Dilatation                                                                                                                                   |
| MYH7     | Cardiovascular disease | circle         | pink | Cardiovascular Hypertrophy,Cardiovascular Damage,Heart Failure                                                                                              |
| PLA2G4A  | Cardiovascular disease | circle         | pink | Cardiovascular Hypertrophy                                                                                                                                  |
| VWF      | Cardiovascular disease | circle         | pink | Heart Failure                                                                                                                                               |
| CALR     | Cardiovascular disease | circle         | pink | Bradycardia                                                                                                                                                 |
| TRIM21   | Cardiovascular disease | circle         | pink | Bradycardia                                                                                                                                                 |
| ANXA1    | Cardiovascular disease | circle         | pink | Cardiovascular Damage                                                                                                                                       |
| ATF4     | Cardiovascular disease | circle         | pink | Cardiovascular Damage                                                                                                                                       |
| CMKLR1   | Cardiovascular disease | circle         | pink | Cardiovascular Hypertrophy                                                                                                                                  |
| CTSC     | Cardiovascular disease | circle         | pink | Cardiovascular Hypertrophy                                                                                                                                  |
| DNAJC3   | Cardiovascular disease | circle         | pink | Cardiovascular Hypertrophy                                                                                                                                  |
| GPX3     | Cardiovascular disease | circle         | pink | Cardiovascular Hypertrophy                                                                                                                                  |
| S100A6   | Cardiovascular disease | circle         | pink | Cardiovascular Hypertrophy                                                                                                                                  |
| CFLAR    | Cardiovascular disease | circle         | pink | Heart Failure                                                                                                                                               |
| PTGER4   | Cardiovascular disease | circle         | pink | Heart Failure                                                                                                                                               |
| RXFP1    | Cardiovascular disease | circle         | pink | Heart Failure                                                                                                                                               |
| ACE      | complex                | Rounded square | gray | Cardiovascular Infarction,Renal Nephritis,Renal Damage,Hepatic Cirrhosis,Cardiovascular Hypertrophy,Cardiovascular Arteriopathy,Heart Failure,Renal Failure |
| ADORA2B  | complex                | Rounded square | gray | Cardiovascular Infarction,Renal Inflammation,Cardiovascular Arteriopathy                                                                                    |
| ADRB1    | complex                | Rounded square | gray | Cardiovascular Infarction,Cardiovascular Necrosis/Cell Death,Hepatic Cirrhosis,Cardiovascular Hypertrophy,Heart Failure,Cardiovascular Dysfunction          |

|        |         |                |      |                                                                                                                                                                                                                                                                                                  |
|--------|---------|----------------|------|--------------------------------------------------------------------------------------------------------------------------------------------------------------------------------------------------------------------------------------------------------------------------------------------------|
| APOE   | complex | Rounded square | gray | Cardiovascular Infarction, Renal Necrosis/Cell Death, Renal Proliferation, Hepatic Necrosis/Cell Death, Glomerular Injury, Cardiovascular Hypertrophy, Cardiovascular Arteriopathy, Hepatic Steatosis                                                                                            |
| CD14   | complex | Rounded square | gray | Cardiovascular Infarction, Cardiovascular Arteriopathy, Hepatic Inflammation, Hepatic Steatosis, Hepatic Hepatitis                                                                                                                                                                               |
| COL3A1 | complex | Rounded square | gray | Cardiovascular Infarction, Renal Tubule Injury                                                                                                                                                                                                                                                   |
| CSF1R  | complex | Rounded square | gray | Cardiovascular Infarction, Hepatocellular Carcinoma                                                                                                                                                                                                                                              |
| CXCR4  | complex | Rounded square | gray | Cardiovascular Infarction, Renal Tubule Injury                                                                                                                                                                                                                                                   |
| HGF    | complex | Rounded square | gray | Cardiovascular Infarction, Renal Necrosis/Cell Death, Renal Proliferation, Renal Inflammation, Cardiovascular Necrosis/Cell Death, Cardiovascular Arteriopathy, Hepatic Regeneration, Hepatic Proliferation, Hepatic Hyperplasia/Hyperproliferation, Hepatocellular Carcinoma, Hepatic Hepatitis |
| ITGB2  | complex | Rounded square | gray | Cardiovascular Infarction, Hepatic Necrosis/Cell Death, Hepatic Damage, Cardiovascular Arteriopathy, Cardiovascular Damage, Hepatic Inflammation                                                                                                                                                 |
| PLAT   | complex | Rounded square | gray | Cardiovascular Infarction, Renal Damage                                                                                                                                                                                                                                                          |
| SELP   | complex | Rounded square | gray | Cardiovascular Infarction, Renal Nephritis, Renal Damage, Cardiovascular Arteriopathy                                                                                                                                                                                                            |
| TLR2   | complex | Rounded square | gray | Cardiovascular Infarction, Renal Nephritis, Renal Necrosis/Cell Death, Renal Damage, Renal Inflammation, Hepatic Damage, Renal Thrombosis                                                                                                                                                        |
| CASP3  | complex | Rounded square | gray | Renal Necrosis/Cell Death, Hepatic Necrosis/Cell Death, Cardiovascular Necrosis/Cell Death, Hepatocellular Carcinoma, Hepatic Hepatitis                                                                                                                                                          |
| HSPB1  | complex | Rounded square | gray | Renal Tubule Injury, Cardiovascular Necrosis/Cell Death                                                                                                                                                                                                                                          |
| IGF1   | complex | Rounded square | gray | Renal Tubule Injury, Renal Necrosis/Cell Death, Renal Proliferation, Renal Damage, Hepatic Necrosis/Cell Death, Renal Inflammation, Cardiovascular Necrosis/Cell Death, Cardiovascular Hypertrophy, Cardiovascular Damage, Hepatic Proliferation                                                 |
| IL6ST  | complex | Rounded square | gray | Hepatic Necrosis/Cell Death, Cardiovascular Necrosis/Cell Death                                                                                                                                                                                                                                  |
| MMP2   | complex | Rounded square | gray | Cardiovascular Necrosis/Cell Death, Cardiovascular Stenosis, Renal Failure                                                                                                                                                                                                                       |
| NPPA   | complex | Rounded square | gray | Renal Necrosis/Cell Death, Cardiovascular Necrosis/Cell Death, Cardiovascular Hypertrophy, Heart Failure, Cardiovascular Stenosis                                                                                                                                                                |
| EGFR   | complex | Rounded square | gray | Renal Proliferation, Hepatic Necrosis/Cell Death, Cardiovascular Hypertrophy, Cardiovascular Arteriopathy, Hepatocellular Carcinoma                                                                                                                                                              |
| HMOX1  | complex | Rounded square | gray | Hepatic Necrosis/Cell Death, Cardiovascular Hypertrophy, Cardiovascular Damage, Renal Failure, Hepatic Hyperbilirubinemia                                                                                                                                                                        |
| MIF    | complex | Rounded square | gray | Renal Damage, Cardiovascular Hypertrophy                                                                                                                                                                                                                                                         |
| PDGFC  | complex | Rounded square | gray | Cardiovascular Hypertrophy, Hepatocellular Carcinoma, Hepatic Fibrosis, Hepatic Steatosis                                                                                                                                                                                                        |
| IL6R   | complex | Rounded square | gray | Hepatic Damage, Cardiovascular Hypertrophy                                                                                                                                                                                                                                                       |
| NFKB1  | complex | Rounded square | gray | Renal Inflammation, Cardiovascular Hypertrophy, Heart Failure, Hepatic Inflammation, Cardiovascular Fibrosis, Hepatic Fibrosis                                                                                                                                                                   |
| STAT3  | complex | Rounded square | gray | Renal Proliferation, Cardiovascular Hypertrophy, Cardiovascular Damage                                                                                                                                                                                                                           |
| ABCA1  | complex | Rounded square | gray | Renal Nephritis, Cardiovascular Arteriopathy                                                                                                                                                                                                                                                     |
| COL5A1 | complex | Rounded square | gray | Renal Tubule Injury, Cardiovascular Arteriopathy                                                                                                                                                                                                                                                 |
| IL1R1  | complex | Rounded square | gray | Hepatic Damage, Cardiovascular Arteriopathy, Hepatic Inflammation                                                                                                                                                                                                                                |
| LBP    | complex | Rounded square | gray | Cardiovascular Arteriopathy, Hepatic Steatosis                                                                                                                                                                                                                                                   |
| LDLR   | complex | Rounded square | gray | Cardiovascular Arteriopathy, Cardiovascular Stenosis, Renal Failure                                                                                                                                                                                                                              |
| P2RX7  | complex | Rounded square | gray | Hepatic Damage, Cardiovascular Arteriopathy                                                                                                                                                                                                                                                      |
| PDE3B  | complex | Rounded square | gray | Renal Nephritis, Cardiovascular Arteriopathy, Nephrosis, Heart Failure, Renal Failure, Hepatic Steatosis, Hepatic Hepatitis                                                                                                                                                                      |
| PDE7B  | complex | Rounded square | gray | Renal Nephritis, Cardiovascular Arteriopathy, Nephrosis, Heart Failure, Renal Failure, Hepatic Steatosis, Hepatic Hepatitis                                                                                                                                                                      |
| PDE8A  | complex | Rounded square | gray | Renal Nephritis, Cardiovascular Arteriopathy, Nephrosis, Heart Failure, Renal Failure, Hepatic Steatosis, Hepatic Hepatitis                                                                                                                                                                      |
| SIRPA  | complex | Rounded square | gray | Cardiovascular Arteriopathy, Hepatic Steatosis                                                                                                                                                                                                                                                   |

|          |                         |                |       |                                                                                                                                                                                                                                                     |
|----------|-------------------------|----------------|-------|-----------------------------------------------------------------------------------------------------------------------------------------------------------------------------------------------------------------------------------------------------|
| TBC1D9   | complex                 | Rounded square | gray  | Hepatic Cirrhosis,Cardiovascular Arteriopathy                                                                                                                                                                                                       |
| BGN      | complex                 | Rounded square | gray  | Renal Necrosis/Cell Death,Renal Proliferation,Cardiovascular Damage,Cardiovascular Dilaton                                                                                                                                                          |
| LMNA     | complex                 | Rounded square | gray  | Cardiovascular Dilaton,Hepatic Steatosis                                                                                                                                                                                                            |
| TGFB2    | complex                 | Rounded square | gray  | Cardiovascular Dilaton,Hepatic Proliferation,Cardiovascular Dysfunction,Hepatoellular Carcinoma,Hepatic Fibrosis                                                                                                                                    |
| TIMP1    | complex                 | Rounded square | gray  | Renal Tubule Injury,Hepatic Necrosis/Cell Death,Cardiovascular Hypertrophy,Cardiovascular Dilaton,Heart Failure,Hepatic Hyperplasia/Hyperproliferation,Cardiovascular Dysfunction,Cardiovascular Fibrosis,Cardiovascular Stenosis,Hepatic Hepatitis |
| PTGS2    | complex                 | Rounded square | gray  | Renal Necrosis/Cell Death,Hepatic Necrosis/Cell Death,Hepatic Damage,Cardiovascular Hypertrophy,Hepatic Regeneration,Heart Failure,Hepatoellular Carcinoma,Renal Failure                                                                            |
| NCF1     | complex                 | Rounded square | gray  | Hepatic Necrosis/Cell Death,Hepatic Damage,Cardiovascular Hypertrophy,Cardiovascular Dilaton,Cardiovascular Dysfunction,Cardiovascular Fibrosis,Hepatic Fibrosis                                                                                    |
| VCAM1    | complex                 | Rounded square | gray  | Renal Nephritis,Cardiovascular Stenosis                                                                                                                                                                                                             |
| CTSB     | complex                 | Rounded square | gray  | Hepatic Necrosis/Cell Death,Hepatic Damage,Cardiovascular Hypertrophy                                                                                                                                                                               |
| HCK      | complex                 | Rounded square | gray  | Renal Damage,Hepatic Damage,Cardiovascular Hypertrophy                                                                                                                                                                                              |
| S100A10  | complex                 | Rounded square | gray  | Renal Tubule Injury,Cardiovascular Hypertrophy                                                                                                                                                                                                      |
| FLT4     | complex                 | Rounded square | gray  | Heart Failure,Hepatoellular Carcinoma                                                                                                                                                                                                               |
| CST3     | complex                 | Rounded square | gray  | Nephrosis,Heart Failure                                                                                                                                                                                                                             |
| CTGF     | complex                 | Rounded square | gray  | Renal Necrosis/Cell Death,Heart Failure,Hepatic Adhesion                                                                                                                                                                                            |
| GSTA5    | complex                 | Rounded square | gray  | Renal Tubule Injury,Hepatic Hyperbilirubinemia                                                                                                                                                                                                      |
| LGALS3   | complex                 | Rounded square | gray  | Renal Tubule Injury,Glomerular Injury,Hepatic Proliferation                                                                                                                                                                                         |
| NGF      | complex                 | Rounded square | gray  | Renal Tubule Injury,Hepatic Necrosis/Cell Death                                                                                                                                                                                                     |
| IFNGR1   | complex                 | Rounded square | gray  | Renal Nephritis,Hepatic Cirrhosis                                                                                                                                                                                                                   |
| PTPRC    | complex                 | Rounded square | gray  | Renal Nephritis,Hepatic Necrosis/Cell Death,Hepatic Hepatitis                                                                                                                                                                                       |
| TLR3     | complex                 | Rounded square | gray  | Renal Nephritis,Hepatic Damage,Hepatic Cirrhosis,Hepatic Hepatitis                                                                                                                                                                                  |
| TNFRSF1A | complex                 | Rounded square | gray  | Renal Nephritis,Hepatic Necrosis/Cell Death,Renal Inflammation,Hepatic Damage,Hepatic Cirrhosis,Hepatic Proliferation,Hepatic Inflammation,Hepatic Steatosis,Hepatic Hepatitis                                                                      |
| TNFRSF1B | complex                 | Rounded square | gray  | Renal Necrosis/Cell Death,Hepatic Necrosis/Cell Death,Hepatic Damage,Hepatic Proliferation,Hepatic Inflammation,Hepatic Hepatitis                                                                                                                   |
| C3       | complex                 | Rounded square | gray  | Renal Damage,Hepatic Damage,Glomerular Injury,Hepatic Regeneration,Hepatic Proliferation,Hepatic Hyperplasia/Hyperproliferation                                                                                                                     |
| MYC      | complex                 | Rounded square | gray  | Hepatic Necrosis/Cell Death,Hepatic Proliferation,Hepatic Hyperplasia/Hyperproliferation,Hepatoellular Carcinoma                                                                                                                                    |
| TUBA1A   | complex                 | Rounded square | gray  | Hepatic Cirrhosis,Hepatoellular Carcinoma                                                                                                                                                                                                           |
| TUBA1C   | complex                 | Rounded square | gray  | Hepatic Cirrhosis,Hepatoellular Carcinoma                                                                                                                                                                                                           |
| TUBB2A   | complex                 | Rounded square | gray  | Hepatic Cirrhosis,Hepatoellular Carcinoma                                                                                                                                                                                                           |
| HP       | complex                 | Rounded square | gray  | Hepatic Inflammation,Hepatoellular Carcinoma,Hepatic Fibrosis                                                                                                                                                                                       |
| FTL      | Hepatoellular Carcinoma | circle         | green | Hepatoellular Carcinoma                                                                                                                                                                                                                             |
| HPSE     | Hepatoellular Carcinoma | circle         | green | Hepatoellular Carcinoma                                                                                                                                                                                                                             |
| IQGAP1   | Hepatoellular Carcinoma | circle         | green | Hepatoellular Carcinoma                                                                                                                                                                                                                             |
| PAK1     | Hepatoellular Carcinoma | circle         | green | Hepatoellular Carcinoma                                                                                                                                                                                                                             |
| PDGFRA   | Hepatoellular Carcinoma | circle         | green | Hepatoellular Carcinoma                                                                                                                                                                                                                             |

|          |                          |        |        |                                                                |
|----------|--------------------------|--------|--------|----------------------------------------------------------------|
| PDGFRL   | Hepatocellular Carcinoma | circle | green  | Hepatocellular Carcinoma                                       |
| SLIT2    | Hepatocellular Carcinoma | circle | green  | Hepatocellular Carcinoma                                       |
| CD24     | Renal disease            | circle | purple | Renal Tubule Injury                                            |
| CP       | Renal disease            | circle | purple | Renal Tubule Injury                                            |
| CTSS     | Renal disease            | circle | purple | Renal Tubule Injury                                            |
| FASN     | Renal disease            | circle | purple | Renal Tubule Injury                                            |
| FBN1     | Renal disease            | circle | purple | Renal Tubule Injury                                            |
| FN1      | Renal disease            | circle | purple | Renal Tubule Injury,Glomerular Injury                          |
| G6PD     | Renal disease            | circle | purple | Renal Tubule Injury                                            |
| HSP90AA1 | Renal disease            | circle | purple | Renal Tubule Injury                                            |
| IGFBP5   | Renal disease            | circle | purple | Renal Tubule Injury                                            |
| LYZ      | Renal disease            | circle | purple | Renal Tubule Injury                                            |
| RAB7L1   | Renal disease            | circle | purple | Renal Tubule Injury                                            |
| ST6GAL1  | Renal disease            | circle | purple | Renal Tubule Injury                                            |
| TXNRD1   | Renal disease            | circle | purple | Renal Tubule Injury                                            |
| YWHAH    | Renal disease            | circle | purple | Renal Tubule Injury                                            |
| ACTN4    | Renal disease            | circle | purple | Renal Nephritis,Glomerular Injury                              |
| C1QA     | Renal disease            | circle | purple | Renal Nephritis,Renal Damage,Renal Thrombosis                  |
| C4A      | Renal disease            | circle | purple | Renal Nephritis,Renal Damage                                   |
| CCR1     | Renal disease            | circle | purple | Renal Nephritis                                                |
| CD80     | Renal disease            | circle | purple | Renal Nephritis                                                |
| CD86     | Renal disease            | circle | purple | Renal Nephritis                                                |
| CFH      | Renal disease            | circle | purple | Renal Nephritis,Renal Damage                                   |
| CXCL16   | Renal disease            | circle | purple | Renal Nephritis                                                |
| FCGR2B   | Renal disease            | circle | purple | Renal Nephritis                                                |
| HLA-DQB1 | Renal disease            | circle | purple | Renal Nephritis                                                |
| IL16     | Renal disease            | circle | purple | Renal Nephritis                                                |
| MFGE8    | Renal disease            | circle | purple | Renal Nephritis                                                |
| NFKB2    | Renal disease            | circle | purple | Renal Nephritis                                                |
| TGM2     | Renal disease            | circle | purple | Renal Nephritis                                                |
| TNFSF13B | Renal disease            | circle | purple | Renal Nephritis                                                |
| CASP12   | Renal disease            | circle | purple | Renal Necrosis/Cell Death                                      |
| DCN      | Renal disease            | circle | purple | Renal Necrosis/Cell Death                                      |
| ILK      | Renal disease            | circle | purple | Renal Necrosis/Cell Death,Renal Failure                        |
| MAFB     | Renal disease            | circle | purple | Renal Necrosis/Cell Death                                      |
| AXL      | Renal disease            | circle | purple | Renal Proliferation                                            |
| CCL21    | Renal disease            | circle | purple | Renal Proliferation                                            |
| FCER1G   | Renal disease            | circle | purple | Renal Proliferation,Glomerular Injury                          |
| GAS6     | Renal disease            | circle | purple | Renal Proliferation,Glomerular Injury                          |
| SPARC    | Renal disease            | circle | purple | Renal Proliferation,Glomerular Injury                          |
| CFB      | Renal disease            | circle | purple | Renal Damage,Renal Inflammation,Renal Thrombosis,Renal Failure |
| FCGR1A   | Renal disease            | circle | purple | Renal Damage                                                   |
| ATP6V1A  | Renal disease            | circle | purple | Nephrosis                                                      |
| GLIS2    | Renal disease            | circle | purple | Nephrosis                                                      |
| INVS     | Renal disease            | circle | purple | Nephrosis                                                      |
| ITGA2    | Renal disease            | circle | purple | Nephrosis                                                      |
| SYNPO    | Renal disease            | circle | purple | Nephrosis                                                      |
| CYP3A4   | Renal disease            | circle | purple | Renal Failure                                                  |
| ARF6     | Hepatic disease          | circle | blue   | Hepatic Necrosis/Cell Death                                    |
| FGL2     | Hepatic disease          | circle | blue   | Hepatic Necrosis/Cell Death                                    |
| ITGAV    | Hepatic disease          | circle | blue   | Hepatic Necrosis/Cell Death,Hepatic Proliferation              |
| PTPN1    | Hepatic disease          | circle | blue   | Hepatic Necrosis/Cell Death,Hepatic Damage                     |
| SLC25A6  | Hepatic disease          | circle | blue   | Hepatic Necrosis/Cell Death                                    |
| TNIP1    | Hepatic disease          | circle | blue   | Hepatic Necrosis/Cell Death                                    |
| CBLB     | Hepatic disease          | circle | blue   | Hepatic Damage                                                 |
| CD44     | Hepatic disease          | circle | blue   | Hepatic Damage,Hepatic Hepatitis                               |
| KRT18    | Hepatic disease          | circle | blue   | Hepatic Damage,Hepatic Cirrhosis                               |
| MT1E     | Hepatic disease          | circle | blue   | Hepatic Damage                                                 |
| ABCC3    | Hepatic disease          | circle | blue   | Hepatic Cirrhosis,Hepatic Hyperbilirubinemia                   |
| TF       | Hepatic disease          | circle | blue   | Hepatic Cirrhosis,Hepatic Proliferation                        |
| C3AR1    | Hepatic disease          | circle | blue   | Hepatic Regeneration,Hepatic Proliferation                     |
| SAT1     | Hepatic disease          | circle | blue   | Hepatic Regeneration,Hepatic Proliferation                     |
| CEBPA    | Hepatic disease          | circle | blue   | Hepatic Proliferation                                          |
| IGF1R    | Hepatic disease          | circle | blue   | Hepatic Proliferation,Hepatic Hepatitis                        |
| SLC7A5   | Hepatic disease          | circle | blue   | Hepatic Proliferation                                          |
| ITGA5    | Hepatic disease          | circle | blue   | Hepatic Adhesion                                               |
| HDAC1    | Hepatic disease          | circle | blue   | Hepatic Proliferation                                          |

|        |                 |        |      |                   |
|--------|-----------------|--------|------|-------------------|
| FGFR1  | Hepatic disease | circle | blue | Hepatic Fibrosis  |
| LIPA   | Hepatic disease | circle | blue | Hepatic Steatosis |
| PITPNA | Hepatic disease | circle | blue | Hepatic Steatosis |
| SCD    | Hepatic disease | circle | blue | Hepatic Steatosis |
| TYROBP | Hepatic disease | circle | blue | Hepatic Hepatitis |

| 3 months $\beta_1$ Arg389 down-regulated |                        |                    |       |                                                   |
|------------------------------------------|------------------------|--------------------|-------|---------------------------------------------------|
| Gene Symbol                              | Disease - General      | Geometrical symbol | Color | Disease - Specified                               |
| JUP                                      | Cardiovascular disease | circle             | pink  | Tachycardia                                       |
| SP4                                      | Cardiovascular disease | circle             | pink  | Tachycardia                                       |
| ABCC8                                    | Cardiovascular disease | circle             | pink  | Cardiovascular Stenosis                           |
| KCNJ11                                   | Cardiovascular disease | circle             | pink  | Cardiovascular Stenosis,Cardiovascular Arrhythmia |
| MLXIPL                                   | Cardiovascular disease | circle             | pink  | Cardiovascular Stenosis                           |
| PPIF                                     | Cardiovascular disease | circle             | pink  | Cardiovascular Necrosis/Cell Death,Heart Failure  |
| A2BP1                                    | Cardiovascular disease | circle             | pink  | Cardiovascular Arteriopathy                       |
| ABAT                                     | Cardiovascular disease | circle             | pink  | Cardiovascular Arteriopathy                       |
| ALDH6A1                                  | Cardiovascular disease | circle             | pink  | Cardiovascular Arteriopathy                       |
| AMPH                                     | Cardiovascular disease | circle             | pink  | Cardiovascular Arteriopathy                       |
| ANO4                                     | Cardiovascular disease | circle             | pink  | Cardiovascular Arteriopathy                       |
| ARHGAP20                                 | Cardiovascular disease | circle             | pink  | Cardiovascular Arteriopathy                       |
| ARHGAP26                                 | Cardiovascular disease | circle             | pink  | Cardiovascular Arteriopathy                       |
| ASB2                                     | Cardiovascular disease | circle             | pink  | Cardiovascular Arteriopathy                       |
| C9ORF5                                   | Cardiovascular disease | circle             | pink  | Cardiovascular Arteriopathy                       |
| CACNA2D1                                 | Cardiovascular disease | circle             | pink  | Cardiovascular Arteriopathy,Heart Failure         |
| CAMK2D                                   | Cardiovascular disease | circle             | pink  | Cardiovascular Arteriopathy                       |
| CDH13                                    | Cardiovascular disease | circle             | pink  | Cardiovascular Arteriopathy                       |
| CELSR2                                   | Cardiovascular disease | circle             | pink  | Cardiovascular Arteriopathy                       |
| COMT                                     | Cardiovascular disease | circle             | pink  | Cardiovascular Arteriopathy                       |
| CPEB3                                    | Cardiovascular disease | circle             | pink  | Cardiovascular Arteriopathy                       |
| CYFIP2                                   | Cardiovascular disease | circle             | pink  | Cardiovascular Arteriopathy                       |
| DAAM1                                    | Cardiovascular disease | circle             | pink  | Cardiovascular Arteriopathy                       |
| DDAH1                                    | Cardiovascular disease | circle             | pink  | Cardiovascular Arteriopathy                       |
| EEPD1                                    | Cardiovascular disease | circle             | pink  | Cardiovascular Arteriopathy                       |
| FANCL                                    | Cardiovascular disease | circle             | pink  | Cardiovascular Arteriopathy                       |
| FREM2                                    | Cardiovascular disease | circle             | pink  | Cardiovascular Arteriopathy                       |
| GALM                                     | Cardiovascular disease | circle             | pink  | Cardiovascular Arteriopathy                       |
| IMMP2L                                   | Cardiovascular disease | circle             | pink  | Cardiovascular Arteriopathy                       |
| IQGAP2                                   | Cardiovascular disease | circle             | pink  | Cardiovascular Arteriopathy                       |

|          |                        |                |      |                                                                                                                                                             |
|----------|------------------------|----------------|------|-------------------------------------------------------------------------------------------------------------------------------------------------------------|
| JPH1     | Cardiovascular disease | circle         | pink | Cardiovascular Arteriopathy                                                                                                                                 |
| KCNB1    | Cardiovascular disease | circle         | pink | Cardiovascular Arteriopathy                                                                                                                                 |
| KIAA0564 | Cardiovascular disease | circle         | pink | Cardiovascular Arteriopathy                                                                                                                                 |
| KIAA1370 | Cardiovascular disease | circle         | pink | Cardiovascular Arteriopathy                                                                                                                                 |
| LGI1     | Cardiovascular disease | circle         | pink | Cardiovascular Arteriopathy                                                                                                                                 |
| LIMCH1   | Cardiovascular disease | circle         | pink | Cardiovascular Arteriopathy                                                                                                                                 |
| MAGI2    | Cardiovascular disease | circle         | pink | Cardiovascular Arteriopathy                                                                                                                                 |
| MECOM    | Cardiovascular disease | circle         | pink | Cardiovascular Arteriopathy                                                                                                                                 |
| MEF2A    | Cardiovascular disease | circle         | pink | Cardiovascular Arteriopathy                                                                                                                                 |
| MLF1     | Cardiovascular disease | circle         | pink | Cardiovascular Arteriopathy                                                                                                                                 |
| PLEKHA6  | Cardiovascular disease | circle         | pink | Cardiovascular Arteriopathy                                                                                                                                 |
| PRKCQ    | Cardiovascular disease | circle         | pink | Cardiovascular Arteriopathy                                                                                                                                 |
| PTPRM    | Cardiovascular disease | circle         | pink | Cardiovascular Arteriopathy                                                                                                                                 |
| PYGB     | Cardiovascular disease | circle         | pink | Cardiovascular Arteriopathy                                                                                                                                 |
| RPS6KA2  | Cardiovascular disease | circle         | pink | Cardiovascular Arteriopathy                                                                                                                                 |
| SEL1L3   | Cardiovascular disease | circle         | pink | Cardiovascular Arteriopathy                                                                                                                                 |
| SH3RF2   | Cardiovascular disease | circle         | pink | Cardiovascular Arteriopathy                                                                                                                                 |
| SNTB1    | Cardiovascular disease | circle         | pink | Cardiovascular Arteriopathy                                                                                                                                 |
| HOPX     | Cardiovascular disease | circle         | pink | Cardiovascular Hypertrophy,Cardiovascular Fibrosis                                                                                                          |
| IRX4     | Cardiovascular disease | circle         | pink | Cardiovascular Hypertrophy                                                                                                                                  |
| PFKFB1   | Cardiovascular disease | circle         | pink | Cardiovascular Hypertrophy                                                                                                                                  |
| TRIM63   | Cardiovascular disease | circle         | pink | Cardiovascular Hypertrophy                                                                                                                                  |
| ATP1A2   | Cardiovascular disease | circle         | pink | Heart Failure,Cardiovascular Arrhythmia                                                                                                                     |
| CACNA1S  | Cardiovascular disease | circle         | pink | Heart Failure,Cardiovascular Congestive Cardiovascular Failure                                                                                              |
| GAB1     | Cardiovascular disease | circle         | pink | Heart Failure                                                                                                                                               |
| KCNIP2   | Cardiovascular disease | circle         | pink | Cardiovascular Arrhythmia                                                                                                                                   |
| ADRA1A   | complex                | Rounded square | gray | Cardiovascular Necrosis/Cell Death,Pulmonary Hypertension,Heart Failure,Cardiovascular Congestive Cardiovascular Failure,Cardiovascular Arrhythmia          |
| HADHA    | complex                | Rounded square | gray | Cardiovascular Necrosis/Cell Death,Renal Tubule Injury,Hepatic Steatosis                                                                                    |
| ACSL1    | complex                | Rounded square | gray | Cardiovascular Arteriopathy,Hepatic Cholestasis                                                                                                             |
| ADK      | complex                | Rounded square | gray | Cardiovascular Arteriopathy,Hepatic Steatosis                                                                                                               |
| FAH      | complex                | Rounded square | gray | Cardiovascular Arteriopathy,Renal Damage                                                                                                                    |
| NPR2     | complex                | Rounded square | gray | Cardiovascular Stenosis,Cardiovascular Arteriopathy,Heart Failure,Cardiovascular Hypertrophy,Cardiovascular Congestive Cardiovascular Failure,Renal Failure |
| NR3C2    | complex                | Rounded square | gray | Cardiovascular Arteriopathy,Heart Failure,Cardiovascular Hypertrophy,Cardiovascular Congestive Cardiovascular Failure,Renal Failure,Cardiovascular Fibrosis |
| P2RY1    | complex                | Rounded square | gray | Cardiovascular Arteriopathy,Renal Fibrosis                                                                                                                  |
| PAH      | complex                | Rounded square | gray | Pulmonary Hypertension,Cardiovascular Arteriopathy,Hepatic Cholestasis                                                                                      |

|            |                 |                |        |                                                                                                                                                                         |
|------------|-----------------|----------------|--------|-------------------------------------------------------------------------------------------------------------------------------------------------------------------------|
| PDE11A     | complex         | Rounded square | gray   | Pulmonary Hypertension,Cardiovascular Arteriopathy,Heart Failure,Hepatic Steatosis,Renal Failure                                                                        |
| PDE7A      | complex         | Rounded square | gray   | Cardiovascular Arteriopathy,Heart Failure,Cardiovascular Congestive Cardiovascular Failure,Hepatic Steatosis,Renal Failure                                              |
| ST6GALNAC3 | complex         | Rounded square | gray   | Cardiovascular Arteriopathy,Renal Tubule Injury                                                                                                                         |
| AGTR1      | complex         | Rounded square | gray   | Heart Failure,Cardiovascular Hypertrophy,Cardiovascular Congestive Cardiovascular Failure,Renal Fibrosis,Cardiovascular Arrhythmia,Renal Damage,Cardiovascular Fibrosis |
| DGAT2      | complex         | Rounded square | gray   | Heart Failure,Hepatic Steatosis                                                                                                                                         |
| ANGPT1     | complex         | Rounded square | gray   | Pulmonary Hypertension,Cardiovascular Hypertrophy                                                                                                                       |
| FABP3      | complex         | Rounded square | gray   | Cardiovascular Hypertrophy,Renal Tubule Injury                                                                                                                          |
| RRM2B      | complex         | Rounded square | gray   | Pulmonary Hypertension,Renal Failure                                                                                                                                    |
| GSTZ1      | complex         | Rounded square | gray   | Hepatic Steatosis,Renal Damage                                                                                                                                          |
| ACAT1      | Renal disease   | circle         | purple | Renal Tubule Injury                                                                                                                                                     |
| HADH       | Renal disease   | circle         | purple | Renal Tubule Injury                                                                                                                                                     |
| NQO1       | Renal disease   | circle         | purple | Renal Tubule Injury                                                                                                                                                     |
| SLC22A5    | Renal disease   | circle         | purple | Renal Tubule Injury                                                                                                                                                     |
| SLC27A1    | Renal disease   | circle         | purple | Renal Tubule Injury                                                                                                                                                     |
| CD59A      | Renal disease   | circle         | purple | Renal Fibrosis                                                                                                                                                          |
| ITGB6      | Renal disease   | circle         | purple | Renal Damage                                                                                                                                                            |
| SLC25A13   | Hepatic disease | circle         | blue   | Hepatic Steatosis,Hepatic Cholestasis                                                                                                                                   |
| MGST3      | Hepatic disease | circle         | blue   | Hepatic Cholestasis                                                                                                                                                     |
| MUT        | Hepatic disease | circle         | blue   | Hepatic Cholestasis                                                                                                                                                     |
| ABCC1      | Hepatic disease | circle         | blue   | Hepatic Cholestasis                                                                                                                                                     |

| 3 months $\beta_1$ Gly389 down-regulated |                        |                    |       |                                                       |
|------------------------------------------|------------------------|--------------------|-------|-------------------------------------------------------|
| Gene Symbol                              | Disease - General      | Geometrical symbol | Color | Disease - Specified                                   |
| A2BP1                                    | Cardiovascular disease | circle             | pink  | Cardiovascular Arteriopathy                           |
| ANO4                                     | Cardiovascular disease | circle             | pink  | Cardiovascular Arteriopathy                           |
| BACH2 (includes EG:60468)                | Cardiovascular disease | circle             | pink  | Cardiovascular Arteriopathy                           |
| CACNA2D1                                 | Cardiovascular disease | circle             | pink  | Cardiovascular Arteriopathy,Heart Failure             |
| CAMK2D                                   | Cardiovascular disease | circle             | pink  | Cardiovascular Arteriopathy,Cardiovascular Dilatation |
| CAMTA1 (includes EG:23261)               | Cardiovascular disease | circle             | pink  | Cardiovascular Arteriopathy                           |
| CDH13                                    | Cardiovascular disease | circle             | pink  | Cardiovascular Arteriopathy                           |
| COMT                                     | Cardiovascular disease | circle             | pink  | Cardiovascular Arteriopathy                           |
| DCP1A                                    | Cardiovascular disease | circle             | pink  | Cardiovascular Arteriopathy                           |
| DDAH1                                    | Cardiovascular disease | circle             | pink  | Cardiovascular Arteriopathy                           |
| DTD1                                     | Cardiovascular disease | circle             | pink  | Cardiovascular Arteriopathy                           |
| EEPD1                                    | Cardiovascular disease | circle             | pink  | Cardiovascular Arteriopathy                           |
| FREM2                                    | Cardiovascular disease | circle             | pink  | Cardiovascular Arteriopathy                           |
| IMMP2L                                   | Cardiovascular disease | circle             | pink  | Cardiovascular Arteriopathy                           |
| JPH1                                     | Cardiovascular disease | circle             | pink  | Cardiovascular Arteriopathy                           |
| KIAA0564                                 | Cardiovascular disease | circle             | pink  | Cardiovascular Arteriopathy                           |
| KIAA1370                                 | Cardiovascular         | circle             | pink  | Cardiovascular Arteriopathy                           |



|                          |                        |                |        |                                                                                                                                                                 |
|--------------------------|------------------------|----------------|--------|-----------------------------------------------------------------------------------------------------------------------------------------------------------------|
|                          | disease                |                |        |                                                                                                                                                                 |
| LEPR                     | Cardiovascular disease | circle         | pink   | Cardiovascular Arteriopathy                                                                                                                                     |
| LGI1                     | Cardiovascular disease | circle         | pink   | Cardiovascular Arteriopathy                                                                                                                                     |
| LIMCH1                   | Cardiovascular disease | circle         | pink   | Cardiovascular Arteriopathy                                                                                                                                     |
| MEF2A (includes EG:4205) | Cardiovascular disease | circle         | pink   | Cardiovascular Arteriopathy,Cardiovascular Dilation                                                                                                             |
| MLF1                     | Cardiovascular disease | circle         | pink   | Cardiovascular Arteriopathy                                                                                                                                     |
| MMD                      | Cardiovascular disease | circle         | pink   | Cardiovascular Arteriopathy                                                                                                                                     |
| PCDH7                    | Cardiovascular disease | circle         | pink   | Cardiovascular Arteriopathy                                                                                                                                     |
| PTPRM                    | Cardiovascular disease | circle         | pink   | Cardiovascular Arteriopathy                                                                                                                                     |
| SCAPER                   | Cardiovascular disease | circle         | pink   | Cardiovascular Arteriopathy                                                                                                                                     |
| SEL1L3                   | Cardiovascular disease | circle         | pink   | Cardiovascular Arteriopathy                                                                                                                                     |
| SH3RF2                   | Cardiovascular disease | circle         | pink   | Cardiovascular Arteriopathy                                                                                                                                     |
| SNTB1                    | Cardiovascular disease | circle         | pink   | Cardiovascular Arteriopathy                                                                                                                                     |
| UBE2O                    | Cardiovascular disease | circle         | pink   | Cardiovascular Arteriopathy                                                                                                                                     |
| USP10                    | Cardiovascular disease | circle         | pink   | Cardiovascular Arteriopathy                                                                                                                                     |
| YEATS2                   | Cardiovascular disease | circle         | pink   | Cardiovascular Arteriopathy                                                                                                                                     |
| HCN4                     | Cardiovascular disease | circle         | pink   | Bradycardia                                                                                                                                                     |
| SP4                      | Cardiovascular disease | circle         | pink   | Bradycardia,Tachycardia                                                                                                                                         |
| GAB1                     | Cardiovascular disease | circle         | pink   | Cardiovascular Dilation,Heart Failure                                                                                                                           |
| PPIF                     | Cardiovascular disease | circle         | pink   | Heart Failure,Cardiovascular Necrosis/Cell Death                                                                                                                |
| KCNIP2                   | Cardiovascular disease | circle         | pink   | Cardiovascular Arrythmia                                                                                                                                        |
| KCNJ11                   | Cardiovascular disease | circle         | pink   | Cardiovascular Arrythmia                                                                                                                                        |
| ST6GALNAC3               | complex                | Rounded square | gray   | Renal Tubule Injury,Cardiovascular Arteriopathy                                                                                                                 |
| NR3C1                    | complex                | Rounded square | gray   | Cardiovascular Arteriopathy,Heart Failure,Cardiovascular Congestive Cardiovascular Failure,Renal Failure                                                        |
| NR3C2                    | complex                | Rounded square | gray   | Cardiovascular Arteriopathy,Heart Failure,Cardiovascular Congestive Cardiovascular Failure,Renal Failure                                                        |
| PDE11A                   | complex                | Rounded square | gray   | Pulmonary Hypertension,Cardiovascular Arteriopathy,Heart Failure,Renal Failure,Hepatic Steatosis                                                                |
| PDE7A                    | complex                | Rounded square | gray   | Cardiovascular Arteriopathy,Heart Failure,Cardiovascular Congestive Cardiovascular Failure,Renal Failure,Hepatic Steatosis                                      |
| RRM2B                    | complex                | Rounded square | gray   | Pulmonary Hypertension,Renal Failure                                                                                                                            |
| AGTR1                    | complex                | Rounded square | gray   | Bradycardia,Heart Failure,Cardiovascular Congestive Cardiovascular Failure,Cardiovascular Arrythmia,Renal Atrophy,Cardiovascular Hyperplasia/Hyperproliferation |
| HBEGF                    | complex                | Rounded square | gray   | Cardiovascular Arteriopathy,Cardiovascular Dilation,Cardiovascular Enlargement,Renal Nephritis                                                                  |
| ADRA1A                   | complex                | Rounded square | gray   | Pulmonary Hypertension,Heart Failure,Cardiovascular Congestive Cardiovascular Failure,Cardiovascular Necrosis/Cell Death,Cardiovascular Arrythmia               |
| PAH                      | complex                | Rounded square | gray   | Pulmonary Hypertension,Cardiovascular Arteriopathy,Hepatic Cholestasis                                                                                          |
| ADK                      | complex                | Rounded square | gray   | Cardiovascular Arteriopathy,Hepatic Steatosis                                                                                                                   |
| ACAT1                    | Renal disease          | circle         | purple | Renal Tubule Injury                                                                                                                                             |
| BMP4                     | Renal disease          | circle         | purple | Renal Tubule Injury                                                                                                                                             |
| HADH                     | Renal disease          | circle         | purple | Renal Tubule Injury                                                                                                                                             |
| NQO1                     | Renal disease          | circle         | purple | Renal Tubule Injury                                                                                                                                             |

|         |                 |        |        |                                       |
|---------|-----------------|--------|--------|---------------------------------------|
| ODC1    | Renal disease   | circle | purple | Renal Tubule Injury                   |
| SLC27A1 | Renal disease   | circle | purple | Renal Tubule Injury                   |
| LAMA5   | Renal disease   | circle | purple | Renal Degradation                     |
| ABCC1   | Hepatic disease | circle | blue   | Hepatic Cholestasis                   |
| MGST3   | Hepatic disease | circle | blue   | Hepatic Cholestasis                   |
| MTTP    | Hepatic disease | circle | blue   | Hepatic Cholestasis,Hepatic Steatosis |
| MUT     | Hepatic disease | circle | blue   | Hepatic Cholestasis                   |
| SCP2    | Hepatic disease | circle | blue   | Hepatic Cholestasis                   |
| INSIG1  | Hepatic disease | circle | blue   | Hepatic Steatosis                     |

| 6 months $\beta_1$ Arg389 down-regulated |                        |                    |       |                                                                                                                                                             |
|------------------------------------------|------------------------|--------------------|-------|-------------------------------------------------------------------------------------------------------------------------------------------------------------|
| Gene Symbol                              | Disease - General      | Geometrical symbol | Color | Disease - Specified                                                                                                                                         |
| AVPR1A                                   | Cardiovascular disease | circle             | pink  | Cardiovascular Congestive Cardiovascular Failure,Heart Failure                                                                                              |
| CACNA1C                                  | Cardiovascular disease | circle             | pink  | Cardiovascular Congestive Cardiovascular Failure,Heart Failure,Cardiovascular Arrhythmia,Tachycardia,Cardiovascular Hypertrophy,Cardiovascular Arteriopathy |
| CACNA1S                                  | Cardiovascular disease | circle             | pink  | Cardiovascular Congestive Cardiovascular Failure,Heart Failure                                                                                              |
| KCNJ2                                    | Cardiovascular disease | circle             | pink  | Cardiovascular Congestive Cardiovascular Failure,Heart Failure,Cardiovascular Arrhythmia,Tachycardia                                                        |
| KCNJ5                                    | Cardiovascular disease | circle             | pink  | Cardiovascular Congestive Cardiovascular Failure,Heart Failure,Cardiovascular Arrhythmia,Cardiovascular Stenosis,Tachycardia                                |
| KCNJ12                                   | Cardiovascular disease | circle             | pink  | Cardiovascular Congestive Cardiovascular Failure,Heart Failure,Cardiovascular Arrhythmia, Tachycardia                                                       |
| KCNK3                                    | Cardiovascular disease | circle             | pink  | Cardiovascular Congestive Cardiovascular Failure,Heart Failure,Cardiovascular Arrhythmia, Tachycardia                                                       |
| THRB                                     | Cardiovascular disease | circle             | pink  | Cardiovascular Congestive Cardiovascular Failure,Heart Failure,Cardiovascular Arrhythmia, Tachycardia,Cardiovascular Arteriopathy                           |
| TNNT2                                    | Cardiovascular disease | circle             | pink  | Cardiovascular Congestive Cardiovascular Failure,Heart Failure,Cardiovascular Arrhythmia, Tachycardia,Cardiovascular Arteriopathy                           |
| ATP1A2                                   | Cardiovascular disease | circle             | pink  | Heart Failure,Cardiovascular Arrhythmia                                                                                                                     |
| KCNH2                                    | Cardiovascular disease | circle             | pink  | Cardiovascular Arrhythmia, Tachycardia                                                                                                                      |
| KCNIP2                                   | Cardiovascular disease | circle             | pink  | Cardiovascular Arrhythmia                                                                                                                                   |
| KCNJ11                                   | Cardiovascular disease | circle             | pink  | Cardiovascular Arrhythmia,Cardiovascular Stenosis                                                                                                           |
| KCNQ1                                    | Cardiovascular disease | circle             | pink  | Cardiovascular Arrhythmia,Cardiovascular Arteriopathy                                                                                                       |
| MAOB                                     | Cardiovascular disease | circle             | pink  | Cardiovascular Arrhythmia, Tachycardia                                                                                                                      |
| GNAS                                     | Cardiovascular disease | circle             | pink  | Cardiovascular Dilation                                                                                                                                     |
| IRX4                                     | Cardiovascular disease | circle             | pink  | Cardiovascular Dilation,Cardiovascular Hypertrophy                                                                                                          |
| KLK2                                     | Cardiovascular disease | circle             | pink  | Cardiovascular Dilation                                                                                                                                     |
| MAP3K5                                   | Cardiovascular disease | circle             | pink  | Cardiovascular Dilation,Cardiovascular Dysfunction,Cardiovascular Fibrosis,Cardiovascular Necrosis/Cell Death,Cardiovascular Hypertrophy                    |
| TNNI3                                    | Cardiovascular disease | circle             | pink  | Heart Failure,Cardiovascular Dilation,Cardiovascular Dysfunction                                                                                            |
| ABCC8                                    | Cardiovascular disease | circle             | pink  | Cardiovascular Stenosis                                                                                                                                     |
| GTF2I                                    | Cardiovascular disease | circle             | pink  | Cardiovascular Stenosis                                                                                                                                     |
| MLXIPL                                   | Cardiovascular disease | circle             | pink  | Cardiovascular Stenosis                                                                                                                                     |
| CACNB2                                   | Cardiovascular disease | circle             | pink  | Heart Failure,Cardiovascular Dysfunction,Cardiovascular Necrosis/Cell Death,Cardiovascular Arteriopathy                                                     |
| CDS1                                     | Cardiovascular disease | circle             | pink  | Heart Failure                                                                                                                                               |
| GAB1                                     | Cardiovascular disease | circle             | pink  | Heart Failure                                                                                                                                               |
| LIMS1                                    | Cardiovascular disease | circle             | pink  | Heart Failure,Cardiovascular Fibrosis                                                                                                                       |
| MYL2                                     | Cardiovascular disease | circle             | pink  | Heart Failure                                                                                                                                               |

|          |                        |        |      |                                                                                           |
|----------|------------------------|--------|------|-------------------------------------------------------------------------------------------|
| PPIF     | Cardiovascular disease | circle | pink | Heart Failure,Cardiovascular Necrosis/Cell Death                                          |
| RAPGEF3  | Cardiovascular disease | circle | pink | Heart Failure                                                                             |
| RYR2     | Cardiovascular disease | circle | pink | Heart Failure,Tachycardia                                                                 |
| KITLG    | Cardiovascular disease | circle | pink | Tachycardia,Cardiovascular Output                                                         |
| CD36     | Cardiovascular disease | circle | pink | Cardiovascular Dysfunction,Cardiovascular Output,Cardiovascular Arteriopathy              |
| GSK3A    | Cardiovascular disease | circle | pink | Cardiovascular Dysfunction,Cardiovascular Necrosis/Cell Death                             |
| HOPX     | Cardiovascular disease | circle | pink | Cardiovascular Fibrosis,Cardiovascular Hypertrophy                                        |
| KLF15    | Cardiovascular disease | circle | pink | Cardiovascular Fibrosis                                                                   |
| PNKD     | Cardiovascular disease | circle | pink | Cardiovascular Fibrosis,Cardiovascular Hypertrophy,Cardiovascular Arteriopathy            |
| MLYCD    | Cardiovascular disease | circle | pink | Cardiovascular Output                                                                     |
| FABP3    | Cardiovascular disease | circle | pink | Cardiovascular Hypertrophy                                                                |
| FHL2     | Cardiovascular disease | circle | pink | Cardiovascular Hypertrophy                                                                |
| LEPR     | Cardiovascular disease | circle | pink | Cardiovascular Necrosis/Cell Death,Cardiovascular Hypertrophy,Cardiovascular Arteriopathy |
| MAP2K6   | Cardiovascular disease | circle | pink | Cardiovascular Hypertrophy                                                                |
| PARP1    | Cardiovascular disease | circle | pink | Cardiovascular Necrosis/Cell Death,Cardiovascular Hypertrophy                             |
| PFKFB1   | Cardiovascular disease | circle | pink | Cardiovascular Hypertrophy                                                                |
| PIK3R1   | Cardiovascular disease | circle | pink | Cardiovascular Hypertrophy                                                                |
| PRKCE    | Cardiovascular disease | circle | pink | Cardiovascular Hypertrophy,Cardiovascular Arteriopathy                                    |
| SLC2A4   | Cardiovascular disease | circle | pink | Cardiovascular Hypertrophy                                                                |
| TRIM63   | Cardiovascular disease | circle | pink | Cardiovascular Hypertrophy                                                                |
| MOV10L1  | Cardiovascular disease | circle | pink | Cardiovascular Hyperplasia/Hyperproliferation                                             |
| A2BP1    | Cardiovascular disease | circle | pink | Cardiovascular Arteriopathy                                                               |
| ABCA12   | Cardiovascular disease | circle | pink | Cardiovascular Arteriopathy                                                               |
| ACSL1    | Cardiovascular disease | circle | pink | Cardiovascular Arteriopathy                                                               |
| ADAMTS3  | Cardiovascular disease | circle | pink | Cardiovascular Arteriopathy                                                               |
| ADAMTS7  | Cardiovascular disease | circle | pink | Cardiovascular Arteriopathy                                                               |
| ALDH5A1  | Cardiovascular disease | circle | pink | Cardiovascular Arteriopathy                                                               |
| ALDH6A1  | Cardiovascular disease | circle | pink | Cardiovascular Arteriopathy                                                               |
| ANKS1A   | Cardiovascular disease | circle | pink | Cardiovascular Arteriopathy                                                               |
| ANO4     | Cardiovascular disease | circle | pink | Cardiovascular Arteriopathy                                                               |
| ARHGAP20 | Cardiovascular disease | circle | pink | Cardiovascular Arteriopathy                                                               |
| ARHGAP26 | Cardiovascular disease | circle | pink | Cardiovascular Arteriopathy                                                               |
| ASB2     | Cardiovascular disease | circle | pink | Cardiovascular Arteriopathy                                                               |
| ASRGL1   | Cardiovascular disease | circle | pink | Cardiovascular Arteriopathy                                                               |
| BACH2    | Cardiovascular disease | circle | pink | Cardiovascular Arteriopathy                                                               |
| BZW2     | Cardiovascular         | circle | pink | Cardiovascular Arteriopathy                                                               |

|          |                        |        |      |                             |
|----------|------------------------|--------|------|-----------------------------|
|          | disease                |        |      |                             |
| C9orf5   | Cardiovascular disease | circle | pink | Cardiovascular Arteriopathy |
| C9orf68  | Cardiovascular disease | circle | pink | Cardiovascular Arteriopathy |
| CAMTA1   | Cardiovascular disease | circle | pink | Cardiovascular Arteriopathy |
| CBFA2T3  | Cardiovascular disease | circle | pink | Cardiovascular Arteriopathy |
| CDH4     | Cardiovascular disease | circle | pink | Cardiovascular Arteriopathy |
| CELSR2   | Cardiovascular disease | circle | pink | Cardiovascular Arteriopathy |
| COQ6     | Cardiovascular disease | circle | pink | Cardiovascular Arteriopathy |
| COX4I1   | Cardiovascular disease | circle | pink | Cardiovascular Arteriopathy |
| CPEB3    | Cardiovascular disease | circle | pink | Cardiovascular Arteriopathy |
| CRYGB    | Cardiovascular disease | circle | pink | Cardiovascular Arteriopathy |
| CTNNA3   | Cardiovascular disease | circle | pink | Cardiovascular Arteriopathy |
| CUX2     | Cardiovascular disease | circle | pink | Cardiovascular Arteriopathy |
| CYFIP2   | Cardiovascular disease | circle | pink | Cardiovascular Arteriopathy |
| DAAM1    | Cardiovascular disease | circle | pink | Cardiovascular Arteriopathy |
| DFNB31   | Cardiovascular disease | circle | pink | Cardiovascular Arteriopathy |
| DPF3     | Cardiovascular disease | circle | pink | Cardiovascular Arteriopathy |
| DPYD     | Cardiovascular disease | circle | pink | Cardiovascular Arteriopathy |
| DTD1     | Cardiovascular disease | circle | pink | Cardiovascular Arteriopathy |
| DTNA     | Cardiovascular disease | circle | pink | Cardiovascular Arteriopathy |
| DUSP10   | Cardiovascular disease | circle | pink | Cardiovascular Arteriopathy |
| EEPD1    | Cardiovascular disease | circle | pink | Cardiovascular Arteriopathy |
| EPB41L4A | Cardiovascular disease | circle | pink | Cardiovascular Arteriopathy |
| ESRRG    | Cardiovascular disease | circle | pink | Cardiovascular Arteriopathy |
| FAH      | Cardiovascular disease | circle | pink | Cardiovascular Arteriopathy |
| FHOD3    | Cardiovascular disease | circle | pink | Cardiovascular Arteriopathy |
| FOXN3    | Cardiovascular disease | circle | pink | Cardiovascular Arteriopathy |
| FOXO3    | Cardiovascular disease | circle | pink | Cardiovascular Arteriopathy |
| FREM2    | Cardiovascular disease | circle | pink | Cardiovascular Arteriopathy |
| FSTL4    | Cardiovascular disease | circle | pink | Cardiovascular Arteriopathy |
| GALM     | Cardiovascular disease | circle | pink | Cardiovascular Arteriopathy |
| GFOD1    | Cardiovascular disease | circle | pink | Cardiovascular Arteriopathy |
| GPR116   | Cardiovascular disease | circle | pink | Cardiovascular Arteriopathy |
| GRM1     | Cardiovascular disease | circle | pink | Cardiovascular Arteriopathy |
| HDAC9    | Cardiovascular disease | circle | pink | Cardiovascular Arteriopathy |
| HNMT     | Cardiovascular disease | circle | pink | Cardiovascular Arteriopathy |

|          |                        |        |      |                             |
|----------|------------------------|--------|------|-----------------------------|
| IDH3B    | Cardiovascular disease | circle | pink | Cardiovascular Arteriopathy |
| INADL    | Cardiovascular disease | circle | pink | Cardiovascular Arteriopathy |
| IQGAP2   | Cardiovascular disease | circle | pink | Cardiovascular Arteriopathy |
| ISCA1L   | Cardiovascular disease | circle | pink | Cardiovascular Arteriopathy |
| ITPR2    | Cardiovascular disease | circle | pink | Cardiovascular Arteriopathy |
| JPH1     | Cardiovascular disease | circle | pink | Cardiovascular Arteriopathy |
| KIAA0564 | Cardiovascular disease | circle | pink | Cardiovascular Arteriopathy |
| KIAA1217 | Cardiovascular disease | circle | pink | Cardiovascular Arteriopathy |
| LGI1     | Cardiovascular disease | circle | pink | Cardiovascular Arteriopathy |
| LIFR     | Cardiovascular disease | circle | pink | Cardiovascular Arteriopathy |
| LIMCH1   | Cardiovascular disease | circle | pink | Cardiovascular Arteriopathy |
| LRRC20   | Cardiovascular disease | circle | pink | Cardiovascular Arteriopathy |
| LTBP1    | Cardiovascular disease | circle | pink | Cardiovascular Arteriopathy |
| MAGI2    | Cardiovascular disease | circle | pink | Cardiovascular Arteriopathy |
| MAGI3    | Cardiovascular disease | circle | pink | Cardiovascular Arteriopathy |
| 6-Mar    | Cardiovascular disease | circle | pink | null                        |
| MEF2A    | Cardiovascular disease | circle | pink | Cardiovascular Arteriopathy |
| MLF1     | Cardiovascular disease | circle | pink | Cardiovascular Arteriopathy |
| MRPS7    | Cardiovascular disease | circle | pink | Cardiovascular Arteriopathy |
| MYH6     | Cardiovascular disease | circle | pink | Cardiovascular Arteriopathy |
| MYO10    | Cardiovascular disease | circle | pink | Cardiovascular Arteriopathy |
| MYO18B   | Cardiovascular disease | circle | pink | Cardiovascular Arteriopathy |
| NCAPD3   | Cardiovascular disease | circle | pink | Cardiovascular Arteriopathy |
| NHSL1    | Cardiovascular disease | circle | pink | Cardiovascular Arteriopathy |
| NSMCE1   | Cardiovascular disease | circle | pink | Cardiovascular Arteriopathy |
| OGDH     | Cardiovascular disease | circle | pink | Cardiovascular Arteriopathy |
| OSBPL3   | Cardiovascular disease | circle | pink | Cardiovascular Arteriopathy |
| P2RY1    | Cardiovascular disease | circle | pink | Cardiovascular Arteriopathy |
| PCDH7    | Cardiovascular disease | circle | pink | Cardiovascular Arteriopathy |
| PLA2G5   | Cardiovascular disease | circle | pink | Cardiovascular Arteriopathy |
| PLK1S1   | Cardiovascular disease | circle | pink | Cardiovascular Arteriopathy |
| PLXNA2   | Cardiovascular disease | circle | pink | Cardiovascular Arteriopathy |
| PPA2     | Cardiovascular disease | circle | pink | Cardiovascular Arteriopathy |
| PPM1L    | Cardiovascular disease | circle | pink | Cardiovascular Arteriopathy |
| PPP1R9A  | Cardiovascular disease | circle | pink | Cardiovascular Arteriopathy |
| PRICKLE1 | Cardiovascular         | circle | pink | Cardiovascular Arteriopathy |

|         |                        |                |      |                                                                                                                                                                                                             |
|---------|------------------------|----------------|------|-------------------------------------------------------------------------------------------------------------------------------------------------------------------------------------------------------------|
|         | disease                |                |      |                                                                                                                                                                                                             |
| PRKCQ   | Cardiovascular disease | circle         | pink | Cardiovascular Arteriopathy                                                                                                                                                                                 |
| PTPRM   | Cardiovascular disease | circle         | pink | Cardiovascular Arteriopathy                                                                                                                                                                                 |
| RPS6KA2 | Cardiovascular disease | circle         | pink | Cardiovascular Arteriopathy                                                                                                                                                                                 |
| RPS6KA5 | Cardiovascular disease | circle         | pink | Cardiovascular Arteriopathy                                                                                                                                                                                 |
| SEMA3A  | Cardiovascular disease | circle         | pink | Cardiovascular Arteriopathy                                                                                                                                                                                 |
| SH3RF2  | Cardiovascular disease | circle         | pink | Cardiovascular Arteriopathy                                                                                                                                                                                 |
| SLC12A7 | Cardiovascular disease | circle         | pink | Cardiovascular Arteriopathy                                                                                                                                                                                 |
| SLC22A3 | Cardiovascular disease | circle         | pink | Cardiovascular Arteriopathy                                                                                                                                                                                 |
| SMAP2   | Cardiovascular disease | circle         | pink | Cardiovascular Arteriopathy                                                                                                                                                                                 |
| SNRPN   | Cardiovascular disease | circle         | pink | Cardiovascular Arteriopathy                                                                                                                                                                                 |
| SUPV3L1 | Cardiovascular disease | circle         | pink | Cardiovascular Arteriopathy                                                                                                                                                                                 |
| TACC2   | Cardiovascular disease | circle         | pink | Cardiovascular Arteriopathy                                                                                                                                                                                 |
| TBC1D4  | Cardiovascular disease | circle         | pink | Cardiovascular Arteriopathy                                                                                                                                                                                 |
| TMED4   | Cardiovascular disease | circle         | pink | Cardiovascular Arteriopathy                                                                                                                                                                                 |
| TNIP3   | Cardiovascular disease | circle         | pink | Cardiovascular Arteriopathy                                                                                                                                                                                 |
| TRDN    | Cardiovascular disease | circle         | pink | Cardiovascular Arteriopathy                                                                                                                                                                                 |
| TUBA8   | Cardiovascular disease | circle         | pink | Cardiovascular Arteriopathy                                                                                                                                                                                 |
| UBE2O   | Cardiovascular disease | circle         | pink | Cardiovascular Arteriopathy                                                                                                                                                                                 |
| VEGFA   | Cardiovascular disease | circle         | pink | Cardiovascular Arteriopathy                                                                                                                                                                                 |
| WRNIP1  | Cardiovascular disease | circle         | pink | Cardiovascular Arteriopathy                                                                                                                                                                                 |
| BAG1    | Cardiovascular disease | circle         | pink | Cardiovascular Necrosis/Cell Death                                                                                                                                                                          |
| BCL2L11 | Cardiovascular disease | circle         | pink | Cardiovascular Necrosis/Cell Death                                                                                                                                                                          |
| HK2     | Cardiovascular disease | circle         | pink | Cardiovascular Necrosis/Cell Death                                                                                                                                                                          |
| HSPD1   | Cardiovascular disease | circle         | pink | Cardiovascular Necrosis/Cell Death                                                                                                                                                                          |
| NAMPT   | Cardiovascular disease | circle         | pink | Cardiovascular Necrosis/Cell Death                                                                                                                                                                          |
| NMNAT1  | Cardiovascular disease | circle         | pink | Cardiovascular Necrosis/Cell Death                                                                                                                                                                          |
| S100A1  | Cardiovascular disease | circle         | pink | Cardiovascular Necrosis/Cell Death                                                                                                                                                                          |
| ADRA1A  | complex                | Rounded square | gray | Cardiovascular Congestive Cardiovascular Failure,Heart Failure,Cardiovascular Arrhythmia,Tachycardia,Cardiovascular Output,Cardiovascular Necrosis/Cell Death,Pulmonary Hypertension                        |
| ADRA1B  | complex                | Rounded square | gray | Cardiovascular Congestive Cardiovascular Failure,Heart Failure,Cardiovascular Arrhythmia,Tachycardia,Cardiovascular Output,Pulmonary Hypertension                                                           |
| AGTR1   | complex                | Rounded square | gray | Cardiovascular Congestive Cardiovascular Failure,Heart Failure,Cardiovascular Arrhythmia,Hepatic Hepatitis,Cardiovascular Fibrosis,Cardiovascular Hypertrophy,Cardiovascular Hyperplasia/Hyperproliferation |
| NR3C2   | complex                | Rounded square | gray | Cardiovascular Congestive Cardiovascular Failure,Heart Failure,Cardiovascular Fibrosis,Renal Failure,Cardiovascular Hypertrophy,Cardiovascular Arteriopathy                                                 |
| PDE3A   | complex                | Rounded square | gray | Cardiovascular Congestive Cardiovascular Failure,Heart Failure,Hepatic Hepatitis,Hepatic Steatohepatitis,Hepatic Steatosis,Renal Failure,Cardiovascular Arteriopathy                                        |
| PDE4A   | complex                | Rounded square | gray | Cardiovascular Congestive Cardiovascular Failure,Heart Failure,Hepatic Hepatitis,Hepatic Steatohepatitis,Hepatic Steatosis,Renal Failure                                                                    |
| PDE4C   | complex                | Rounded        | gray | Cardiovascular Congestive Cardiovascular Failure,Heart Failure,Hepatic                                                                                                                                      |

|          |                 |                |        |                                                                                                                                                                      |
|----------|-----------------|----------------|--------|----------------------------------------------------------------------------------------------------------------------------------------------------------------------|
|          |                 | square         |        | Hepatitis,Hepatic Steatohepatitis,Hepatic Steatosis,Renal Failure,Cardiovascular Arteriopathy                                                                        |
| PDE7A    | complex         | Rounded square | gray   | Cardiovascular Congestive Cardiovascular Failure,Heart Failure,Hepatic Hepatitis,Hepatic Steatohepatitis,Hepatic Steatosis,Renal Failure,Cardiovascular Arteriopathy |
| LPL      | complex         | Rounded square | gray   | Cardiovascular Dilation,Cardiovascular Dysfunction,Renal Failure,Cardiovascular Arteriopathy                                                                         |
| RAF1     | complex         | Rounded square | gray   | Heart Failure,Cardiovascular Dilation,Cardiovascular Dysfunction,Cardiovascular Fibrosis,Cardiovascular Necrosis/Cell Death,Pulmonary Hypertension                   |
| SOD2     | complex         | Rounded square | gray   | Cardiovascular Dilation,Hepatic Hepatitis,Hepatic Steatohepatitis,Hepatic Steatosis,Cardiovascular Necrosis/Cell Death                                               |
| DGAT2    | complex         | Rounded square | gray   | Heart Failure,Hepatic Steatosis                                                                                                                                      |
| GHR      | complex         | Rounded square | gray   | Heart Failure,Renal Failure                                                                                                                                          |
| PDE11A   | complex         | Rounded square | gray   | Heart Failure,Hepatic Hepatitis,Hepatic Steatohepatitis,Hepatic Steatosis,Renal Failure,Pulmonary Hypertension,Cardiovascular Arteriopathy                           |
| PPARA    | complex         | Rounded square | gray   | Hepatic Hepatitis,Hepatic Steatohepatitis,Hepatic Steatosis,Cardiovascular Dysfunction,Cardiovascular Arteriopathy                                                   |
| INSR     | complex         | Rounded square | gray   | Hepatic Hepatitis,Cardiovascular Output                                                                                                                              |
| HADHA    | complex         | Rounded square | gray   | Hepatic Steatosis,Cardiovascular Necrosis/Cell Death                                                                                                                 |
| ANGPT1   | complex         | Rounded square | gray   | Cardiovascular Hypertrophy,Pulmonary Hypertension                                                                                                                    |
| ACOX1    | complex         | Rounded square | gray   | Hepatic Hepatitis,Hepatic Steatohepatitis,Hepatic Steatosis,Cardiovascular Arteriopathy                                                                              |
| ADK      | complex         | Rounded square | gray   | Hepatic Steatosis,Cardiovascular Arteriopathy                                                                                                                        |
| AMY2A    | complex         | Rounded square | gray   | Hepatic Steatosis,Cardiovascular Arteriopathy                                                                                                                        |
| MTOR     | complex         | Rounded square | gray   | Hepatic Hepatitis,Cardiovascular Arteriopathy                                                                                                                        |
| PAH      | complex         | Rounded square | gray   | Pulmonary Hypertension,Cardiovascular Arteriopathy                                                                                                                   |
| CTLA4    | complex         | Rounded square | gray   | Hepatic Hepatitis,Renal Atrophy                                                                                                                                      |
| RRM2B    | complex         | Rounded square | gray   | Renal Failure,Pulmonary Hypertension                                                                                                                                 |
| GSTP1    | Renal disease   | circle         | purple | Renal Failure                                                                                                                                                        |
| PTGDS    | Renal disease   | circle         | purple | Renal Failure                                                                                                                                                        |
| EGF      | Renal disease   | circle         | purple | Renal Atrophy                                                                                                                                                        |
| ADIPOR2  | Hepatic disease | circle         | blue   | Hepatic Hepatitis,Hepatic Steatohepatitis,Hepatic Steatosis                                                                                                          |
| GPT      | Hepatic disease | circle         | blue   | Hepatic Hepatitis,Hepatic Steatohepatitis,Hepatic Steatosis                                                                                                          |
| SOD1     | Hepatic disease | circle         | blue   | Hepatic Hepatitis,Hepatic Steatohepatitis,Hepatic Steatosis                                                                                                          |
| EGLN1    | Hepatic disease | circle         | blue   | Hepatic Steatosis                                                                                                                                                    |
| GSTZ1    | Hepatic disease | circle         | blue   | Hepatic Hepatitis,Hepatic Steatosis                                                                                                                                  |
| SLC25A13 | Hepatic disease | circle         | blue   | Hepatic Steatosis                                                                                                                                                    |
| IL10RB   | Hepatic disease | circle         | blue   | Hepatic Hepatitis                                                                                                                                                    |

| 6 months $\beta_1$ Gly389 down-regulated |                        |                    |       |                                                                                                                                             |
|------------------------------------------|------------------------|--------------------|-------|---------------------------------------------------------------------------------------------------------------------------------------------|
| Gene Symbol                              | Disease - General      | Geometrical symbol | Color | Disease - Specified                                                                                                                         |
| IRX4                                     | Cardiovascular disease | circle             | pink  | Cardiovascular Dilation,Cardiovascular Hypertrophy                                                                                          |
| KLK2                                     | Cardiovascular disease | circle             | pink  | Cardiovascular Dilation                                                                                                                     |
| LPL                                      | Cardiovascular disease | circle             | pink  | Cardiovascular Dilation,Cardiovascular Dysfunction                                                                                          |
| MAP3K5                                   | Cardiovascular disease | circle             | pink  | Cardiovascular Dilation,Cardiovascular Dysfunction,Cardiovascular Hypertrophy,Cardiovascular Fibrosis                                       |
| TNNI3                                    | Cardiovascular disease | circle             | pink  | Cardiovascular Dilation,Cardiovascular Dysfunction,Heart Failure                                                                            |
| AGTR1                                    | Cardiovascular disease | circle             | pink  | Cardiovascular Arrhythmia,Cardiovascular Congestive Cardiovascular Failure,Heart Failure,Cardiovascular Hypertrophy,Cardiovascular Fibrosis |
| ATP1A2                                   | Cardiovascular disease | circle             | pink  | Cardiovascular Arrhythmia,Heart Failure                                                                                                     |
| KCNH2                                    | Cardiovascular disease | circle             | pink  | Cardiovascular Arrhythmia,Tachycardia                                                                                                       |

|         |                        |                |        |                                                                                                                                                                                         |
|---------|------------------------|----------------|--------|-----------------------------------------------------------------------------------------------------------------------------------------------------------------------------------------|
| KCNIP2  | Cardiovascular disease | circle         | pink   | Cardiovascular Arrhythmia                                                                                                                                                               |
| KCNJ11  | Cardiovascular disease | circle         | pink   | Cardiovascular Arrhythmia,Cardiovascular Stenosis                                                                                                                                       |
| KCNJ12  | Cardiovascular disease | circle         | pink   | Cardiovascular Arrhythmia,Tachycardia,Cardiovascular Congestive Cardiovascular Failure,Heart Failure                                                                                    |
| KCNK3   | Cardiovascular disease | circle         | pink   | Cardiovascular Arrhythmia,Tachycardia,Cardiovascular Congestive Cardiovascular Failure,Heart Failure                                                                                    |
| MAOB    | Cardiovascular disease | circle         | pink   | Cardiovascular Arrhythmia,Tachycardia                                                                                                                                                   |
| GSK3A   | Cardiovascular disease | circle         | pink   | Cardiovascular Dysfunction                                                                                                                                                              |
| SPEG    | Cardiovascular disease | circle         | pink   | Cardiovascular Enlargement                                                                                                                                                              |
| ABCC8   | Cardiovascular disease | circle         | pink   | Cardiovascular Stenosis                                                                                                                                                                 |
| MLXIPL  | Cardiovascular disease | circle         | pink   | Cardiovascular Stenosis                                                                                                                                                                 |
| CACNA1S | Cardiovascular disease | circle         | pink   | Cardiovascular Congestive Cardiovascular Failure,Heart Failure                                                                                                                          |
| NR3C2   | Cardiovascular disease | circle         | pink   | Cardiovascular Congestive Cardiovascular Failure,Heart Failure,Cardiovascular Hypertrophy,Cardiovascular Fibrosis                                                                       |
| DTNA    | Cardiovascular disease | circle         | pink   | Congenital Heart Anomaly                                                                                                                                                                |
| NOTCH1  | Cardiovascular disease | circle         | pink   | Congenital Heart Anomaly                                                                                                                                                                |
| PPIF    | Cardiovascular disease | circle         | pink   | Heart Failure,Cardiovascular Necrosis/Cell Death                                                                                                                                        |
| FABP3   | Cardiovascular disease | circle         | pink   | Cardiovascular Hypertrophy                                                                                                                                                              |
| FHL2    | Cardiovascular disease | circle         | pink   | Cardiovascular Hypertrophy                                                                                                                                                              |
| HOPX    | Cardiovascular disease | circle         | pink   | Cardiovascular Hypertrophy,Cardiovascular Fibrosis                                                                                                                                      |
| LEPR    | Cardiovascular disease | circle         | pink   | Cardiovascular Hypertrophy                                                                                                                                                              |
| PFKFB1  | Cardiovascular disease | circle         | pink   | Cardiovascular Hypertrophy                                                                                                                                                              |
| SLC2A4  | Cardiovascular disease | circle         | pink   | Cardiovascular Hypertrophy                                                                                                                                                              |
| TRIM63  | Cardiovascular disease | circle         | pink   | Cardiovascular Hypertrophy                                                                                                                                                              |
| TRPC1   | Cardiovascular disease | circle         | pink   | Cardiovascular Hypertrophy                                                                                                                                                              |
| GAB1    | Cardiovascular disease | circle         | pink   | Heart Failure                                                                                                                                                                           |
| MYL2    | Cardiovascular disease | circle         | pink   | Heart Failure                                                                                                                                                                           |
| RAF1    | complex                | Rounded square | gray   | Cardiovascular Dilatation,Cardiovascular Dysfunction,Heart Failure,Cardiovascular Fibrosis,Pulmonary Hypertension                                                                       |
| SOD2    | complex                | Rounded square | gray   | Cardiovascular Dilatation,Cardiovascular Enlargement,Hepatic Steatosis,Hepatic Hepatitis,Hepatic Steatohepatitis                                                                        |
| ADRA1A  | complex                | Rounded square | gray   | Cardiovascular Arrhythmia,Tachycardia,Cardiovascular Congestive Cardiovascular Failure,Heart Failure,Congenital Heart Anomaly,Cardiovascular Necrosis/Cell Death,Pulmonary Hypertension |
| ADRA1D  | complex                | Rounded square | gray   | Cardiovascular Arrhythmia,Tachycardia,Cardiovascular Congestive Cardiovascular Failure,Heart Failure,Congenital Heart Anomaly,Pulmonary Hypertension                                    |
| THRA    | complex                | Rounded square | gray   | Cardiovascular Arrhythmia,Tachycardia,Cardiovascular Congestive Cardiovascular Failure,Heart Failure,Hepatic Steatosis                                                                  |
| PPARA   | complex                | Rounded square | gray   | Cardiovascular Dysfunction,Hepatic Steatosis,Hepatic Hepatitis,Hepatic Steatohepatitis                                                                                                  |
| PDE3A   | complex                | Rounded square | gray   | Cardiovascular Congestive Cardiovascular Failure,Heart Failure,Hepatic Steatosis,Hepatic Hepatitis,Hepatic Steatohepatitis                                                              |
| HADHA   | complex                | Rounded square | gray   | Cardiovascular Necrosis/Cell Death,Hepatic Steatosis                                                                                                                                    |
| DGAT2   | complex                | Rounded square | gray   | Heart Failure,Hepatic Steatosis                                                                                                                                                         |
| PDE11A  | complex                | Rounded square | gray   | Heart Failure,Hepatic Steatosis,Pulmonary Hypertension,Hepatic Hepatitis,Hepatic Steatohepatitis                                                                                        |
| PAH     | Hypertension           | circle         | olive  | Pulmonary Hypertension                                                                                                                                                                  |
| CTLA4   | Renal disease          | circle         | purple | Renal Atrophy                                                                                                                                                                           |



|          |                 |        |        |                                                             |
|----------|-----------------|--------|--------|-------------------------------------------------------------|
| EGF      | Renal disease   | circle | purple | Renal Atrophy                                               |
| ADK      | Hepatic disease | circle | blue   | Hepatic Steatosis                                           |
| GPT      | Hepatic disease | circle | blue   | Hepatic Steatosis,Hepatic Hepatitis,Hepatic Steatohepatitis |
| INSIG1   | Hepatic disease | circle | blue   | Hepatic Steatosis                                           |
| SLC25A13 | Hepatic disease | circle | blue   | Hepatic Steatosis                                           |

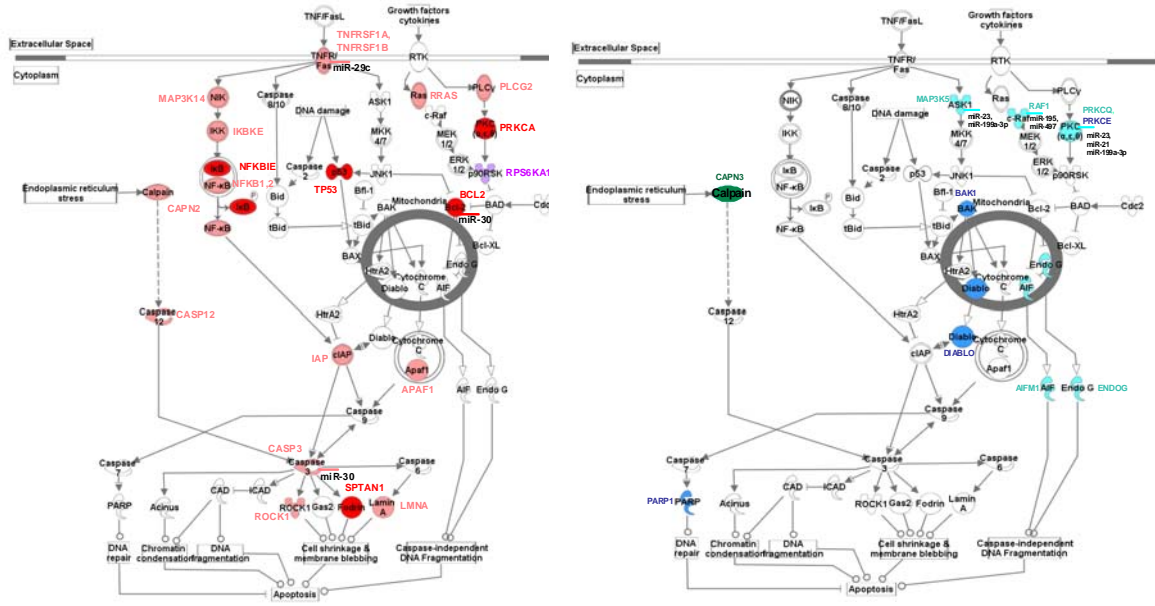

**A** ■ Up-regulated in Arg and Gly ■ Up-regulated in Arg only ■ Up-regulated in Gly only ■ Down-regulated in Arg only ■ Down-regulated in Arg and Gly ■ Down-regulated in Arg and Gly 3 and 6 months

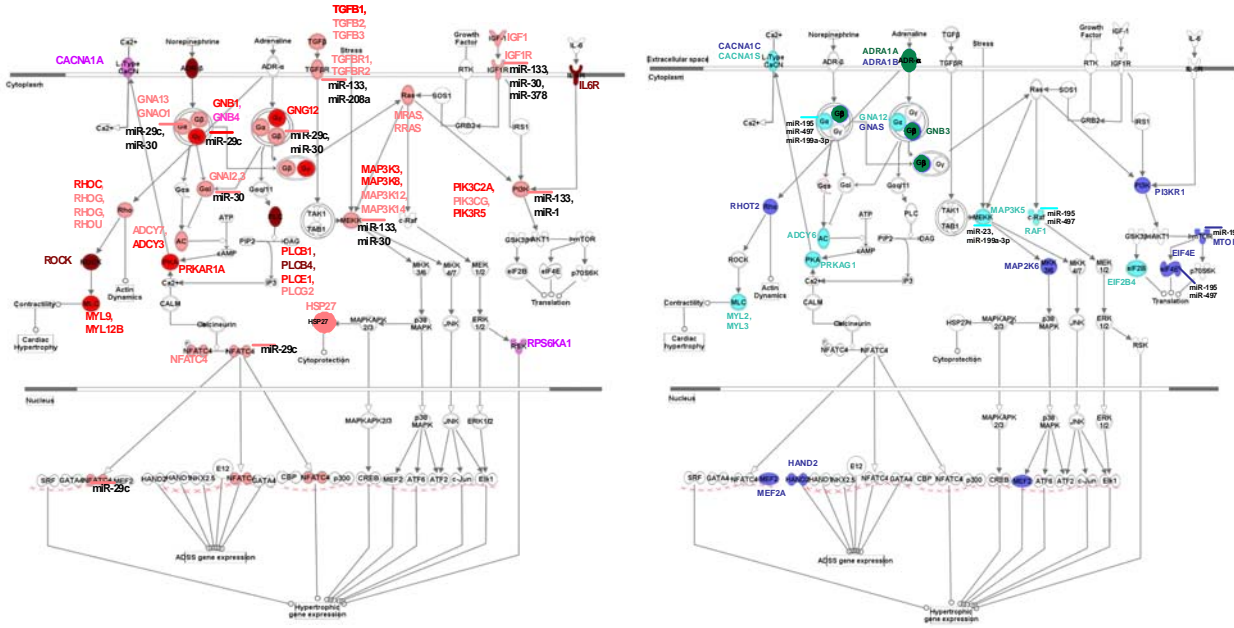

■ Up-regulated in Arg and Gly ■ Up-regulated in Arg only ■ Up-regulated in Gly only ■ Up-regulated in Arg and Gly 3 and 6 months ■ Down-regulated in Arg only ■ Down-regulated in Arg and Gly ■ Down-regulated in Arg and Gly 3 and 6 months

**B**

Figure S2: Canonical pathway analysis of differentially regulated genes. Genes up- or down-regulated in  $\beta_1$ -Arg389 or  $\beta_1$ -Gly389 transgenic animals were subjected to Ingenuity Pathway analysis. The apoptosis (A) and cardiac hypertrophy (B) pathways are shown. Genes are color coded according to regulation in Arg or Gly only, in both animals at 6-8 months old or in all ages and genotypes. miRNAs that can potentially regulate specific genes are annotated in the Figure.

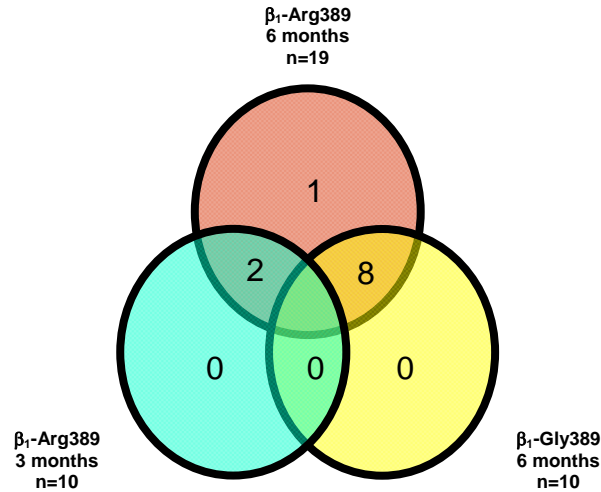

Figure S3: Distribution of collagen genes differentially regulated in 3 and 6 months  $\beta_1$ -Arg389 and 6 months  $\beta_1$ -Gly389 transgenic animals. No collagen genes are up-regulated in 3 months  $\beta_1$ -Gly389 animals and this time point is not represented in the diagram. Numbers in each partition represent the number of commonly or uniquely regulated genes in each animal model. The size of each partition is not to scale. The total number of regulated genes is defined on the left and right side of the diagrams.

**Table S6:** Ingenuity Pathway analysis. Biological function of potential miRNAs-target mRNAs regulated in each transgenic model was subjected to Ingenuity Pathway analysis and is described in the table.

| Gene Annotation                         | Down-Reg Arg | Down-Reg Gly | Up-Reg Arg | Up-Reg Gly |
|-----------------------------------------|--------------|--------------|------------|------------|
| Metabolic Diseases                      | 10           | 7            | 102        | 77         |
| Cellular Growth and Proliferation       | 34           | 7            | 108        | 74         |
| Lipid Metabolism (including fatty acid) | 16           | 13           | 6          | 10         |
| Gene Expression                         | 36           | 12           | 26         | 1          |
| Molecular Transport                     | 20           | 15           | 5          | 17         |
| Cell Signaling                          | 2            | 6            | 15         | 20         |
| Cardiovascular Disease                  | 44           | 29           | 91         | 20         |
| Inflammatory Disease                    | 19           | 28           | 98         | 70         |
| Inflammatory Response                   | 4            | 4            | 20         | 20         |
| Apoptosis                               | 26           | 2            | 90         | 62         |

**Table S7: Putative mRNA targets for regulated miRNAs – 3 months**

| ARG 3 months                  |                                       | GLY 3 months       |                       | ARG 3 months                 |                     |
|-------------------------------|---------------------------------------|--------------------|-----------------------|------------------------------|---------------------|
| Up-regulated mRNAs            | Down-regulated miRNAs                 | Up-regulated mRNAs | Down-regulated miRNAs | Down-regulated mRNAs         | Up-regulated miRNAs |
| EDEM1                         | mir-133a , mir-133b                   | PTPRD              | mir-133a , mir-133b   | ARHGAP26 , KIAA0621          | mir-449a            |
| ADRB1                         | let-7b , let-7f                       | FAM46A             | mir-133a , mir-133b   | DAAM1 , KIAA0666             | mir-449a            |
| COL1A2                        | let-7b , let-7f                       | PREX1              | mir-133a , mir-133b   | FRAG1 , DKFZp434C192 , PGAP2 | mir-449a            |
| BCAT1                         | let-7b , let-7f                       | FURIN              | mir-133a , mir-133b   | PTPRM                        | mir-449a            |
| MMP14                         | mir-133a , mir-133b                   | NLE1               | mir-133a , mir-133b   | ZCCHC17                      | mir-449a            |
| EIF4A1                        | mir-133a , mir-133b                   | DUSP5              | mir-133a , mir-133b   | LG11                         | mir-449a            |
| CDKN1A                        | let-7b , let-7f                       |                    |                       | IGSF1                        | mir-449a            |
| TRAM2                         | mir-133a , mir-133b                   |                    |                       | AK023401 , LRRC55            | mir-449a            |
| SORBS3                        | mir-133a , mir-133b                   |                    |                       | DKFZp666A071 , SLC44A2       | mir-449a            |
| GALNT2                        | let-7b , let-7f                       |                    |                       | ACSL1                        | mir-449a            |
| CD47                          | mir-133a , mir-133b                   |                    |                       | SOX4                         | mir-449a            |
| FBN1                          | mir-133a , mir-133b                   |                    |                       | ATP1A2 , KIAA0778            | mir-449a            |
| GLT8D3                        | let-7b , let-7f , mir-133a , mir-133b |                    |                       | RIC8B                        | mir-449a            |
| CLCN5                         | let-7b , let-7f                       |                    |                       | PKIA                         | mir-449a            |
| MSN , MSN/ALK fusion          | mir-133a , mir-133b                   |                    |                       |                              |                     |
| CDV3                          | let-7b , let-7f                       |                    |                       |                              |                     |
| CERCAM                        | let-7b , let-7f                       |                    |                       |                              |                     |
| COL4A1                        | let-7b , let-7f                       |                    |                       |                              |                     |
| GATM                          | let-7b , let-7f                       |                    |                       |                              |                     |
| COL1A1                        | let-7b , let-7f , mir-133a , mir-133b |                    |                       |                              |                     |
| MYO1F variant protein , MYO1F | let-7b , let-7f                       |                    |                       |                              |                     |
| DKFZp761M1816 , STXBP6        | mir-133a , mir-133b                   |                    |                       |                              |                     |
| p62 , IGF2BP2                 | let-7b , let-7f                       |                    |                       |                              |                     |
| ATP8B4 , KIAA1939             | let-7b , let-7f                       |                    |                       |                              |                     |
| DTX4                          | let-7b , let-7f                       |                    |                       |                              |                     |
| GRPEL2                        | let-7b , let-7f                       |                    |                       |                              |                     |
| LOXL4                         | let-7b , let-7f , mir-133a , mir-133b |                    |                       |                              |                     |
| OSMR                          | let-7b , let-7f                       |                    |                       |                              |                     |
| NID2                          | let-7b , let-7f                       |                    |                       |                              |                     |
| GALC                          | let-7b , let-7f                       |                    |                       |                              |                     |
| GOLGA4                        | let-7b , let-7f                       |                    |                       |                              |                     |
| COL4A2                        | let-7b , let-7f                       |                    |                       |                              |                     |
| RTN4RL1                       | mir-133a , mir-133b                   |                    |                       |                              |                     |
| PGRMC1                        | let-7b , let-7f                       |                    |                       |                              |                     |
| PTPRD                         | let-7b , let-7f , mir-133a , mir-133b |                    |                       |                              |                     |
| COL3A1                        | let-7b , let-7f                       |                    |                       |                              |                     |
| DAGLA                         | let-7b , let-7f                       |                    |                       |                              |                     |
| FAM46A                        | mir-133a , mir-133b                   |                    |                       |                              |                     |
| SLC16A14                      | let-7b , let-7f                       |                    |                       |                              |                     |
| DYRK2                         | let-7b , let-7f                       |                    |                       |                              |                     |
| ADRBK2                        | let-7b , let-7f                       |                    |                       |                              |                     |

**Table S7: Putative mRNA targets for down-regulated miRNAs – 6 months**

| Arg 6 months                    |                                                           | GLY 6 months                    |                                                   |
|---------------------------------|-----------------------------------------------------------|---------------------------------|---------------------------------------------------|
| Up-regulated mRNAs              | Down-regulated miRNAs                                     | Up-regulated mRNAs              | Down-regulated miRNAs                             |
| MYH10 , MYH10 variant protein   | mir-208a , mir-30b , mir-30e                              | MYH10 , MYH10 variant protein   | mir-208b , mir-208a , mir-30b , mir-30e           |
| SKI                             | mir-29c                                                   | SKI                             | mir-29c                                           |
| SNX1                            | mir-133a , mir-30b , mir-133b , mir-30e                   | SNX1                            | mir-133a , mir-30b , mir-133b , mir-30e           |
| TBC1D2B                         | mir-30b , mir-30e                                         | DKFZp686A01127 , BNC2           | mir-208b , mir-208a , mir-30b , mir-30e           |
| DKFZp686A01127 , BNC2           | mir-208a , mir-30b , mir-30e                              | HNRNPF                          | mir-29c                                           |
| HNRNPF                          | mir-29c                                                   | SHISA5 , DKFZp566M051           | mir-133a , mir-133b                               |
| SHISA5 , DKFZp566M051           | mir-133a , mir-133b                                       | LCP1                            | mir-30b , mir-30e                                 |
| LCP1                            | mir-30b , mir-30e                                         | ADRB1                           | mir-30b , mir-30e                                 |
| PIAS3 , DKFZp727A051            | mir-1                                                     | SMAD1 , BC069804                | mir-30b , mir-30e                                 |
| ADRB1                           | mir-30b , mir-30e                                         | RAB23 , hRAB-23                 | mir-30b , mir-30e                                 |
| SMAD1 , BC069804                | mir-30b , mir-30e                                         | HIP1                            | mir-29c                                           |
| RAB23 , hRAB-23                 | mir-30b , mir-30e                                         | CACHD1                          | mir-30b , mir-30e                                 |
| TTYH3                           | mir-133a , mir-133b                                       | SGMS2                           | mir-133a , mir-133b                               |
| RAPH1                           | mir-133a , mir-30b , mir-29c , mir-133b , mir-30e         | GALNTL1                         | mir-133a , mir-133b                               |
| HIP1                            | mir-29c                                                   | MMP14                           | mir-133a , mir-133b                               |
| TRIM37                          | mir-29c                                                   | MAF                             | mir-30b , mir-30e                                 |
| CACHD1                          | mir-30b , mir-30e                                         | CNN3                            | mir-1                                             |
| SGMS2                           | mir-133a , mir-133b                                       | HCN1                            | mir-1                                             |
| EPHA7                           | mir-133a , mir-133b                                       | DKFZp564B0982 , CEP170          | mir-30b , mir-30e                                 |
| GALNTL1                         | mir-133a , mir-133b                                       | HSP90B1                         | mir-1                                             |
| DCUN1D3                         | mir-30b , mir-30e                                         | ZFP36L2                         | mir-1                                             |
| MMP14                           | mir-133a , mir-133b                                       | NID1                            | mir-30b , mir-29c , mir-30e                       |
| MAF                             | mir-30b , mir-30e                                         | EIF4A1                          | mir-133a , mir-133b                               |
| CNN3                            | mir-1                                                     | PICALM variant protein , PICALM | mir-30b , mir-1 , mir-30e                         |
| CORO1C                          | mir-133a , mir-1 , mir-133b                               | FAM3C                           | mir-29c                                           |
| DKFZp564B0982 , CEP170          | mir-30b , mir-30e                                         | RAB8A                           | mir-30b , mir-30e                                 |
| CTHRC1                          | mir-30b , mir-30e                                         | RBMS3                           | mir-378                                           |
| HSP90B1                         | mir-1                                                     | MARK1 , KIAA1477                | mir-30b , mir-30e                                 |
| CD276                           | mir-29c                                                   | TRAM2                           | mir-133a , mir-30b , mir-29c , mir-133b , mir-30e |
| NFAT5 , KIAA0827                | mir-133a , mir-30b , mir-29c , mir-1 , mir-133b , mir-30e | ADAM9                           | mir-30b , mir-30e                                 |
| ZFP36L2                         | mir-1                                                     | TNS3                            | mir-1                                             |
| NID1                            | mir-30b , mir-29c , mir-30e                               | MAFB                            | mir-29c                                           |
| EIF4A1                          | mir-133a , mir-133b                                       | BAIAP2                          | mir-29c , mir-1                                   |
| PICALM variant protein , PICALM | mir-30b , mir-1 , mir-30e                                 | CD47                            | mir-133a , mir-133b                               |
| FAM3C                           | mir-29c                                                   | SLC6A9                          | mir-30b , mir-30e                                 |
| hGli2 , GLI2 , Gli2             | mir-30b , mir-30e                                         | PTPN1                           | mir-29c , mir-1                                   |
| RAB8A                           | mir-30b , mir-30e                                         | CPNE8                           | mir-30b , mir-30e                                 |
| RBMS3                           | mir-378                                                   | DOCK7 , KIAA1771                | mir-30b , mir-30e                                 |
| MARK1 , KIAA1477                | mir-30b , mir-30e                                         | FBN1                            | mir-133a , mir-29c , mir-133b                     |
| TRAM2                           | mir-133a , mir-30b , mir-29c , mir-133b , mir-30e         | PGAM1                           | mir-1                                             |
| ADAM9                           | mir-30b , mir-30e                                         | CAMK1D                          | mir-29c                                           |
| RUNX2                           | mir-30b , mir-30e                                         | TRPS1                           | mir-30b , mir-1 , mir-30e                         |
| TNS3                            | mir-1                                                     | FYB                             | mir-1                                             |
| SNX29                           | mir-30b , mir-30e                                         | DSEL                            | mir-30b , mir-30e                                 |
| BAIAP2                          | mir-29c , mir-1                                           | ELN                             | mir-29c                                           |
| CD47                            | mir-133a , mir-133b                                       | GAS7                            | mir-29c                                           |
| SLC6A9                          | mir-30b , mir-30e                                         | MMP2                            | mir-29c                                           |
| KIAA1550 , PLXNA4               | mir-29c , mir-1                                           | AQP4                            | mir-29c                                           |
| PTPN1                           | mir-29c , mir-1                                           | AK124386 , TMEM110              | mir-133a , mir-133b                               |
| CPNE8                           | mir-30b , mir-30e                                         | ANXA4                           | mir-1                                             |
| PGM3 , HsAGM1                   | mir-30b , mir-30e                                         | RAP1B , LOC643752               | mir-30b , mir-30e                                 |
| COL5A3                          | mir-133a , mir-29c , mir-133b                             | MSN , MSN/ALK fusion            | mir-133a , mir-133b                               |
| DOCK7 , KIAA1771                | mir-30b , mir-30e                                         | SOX5 , L-SOX5                   | mir-208b , mir-208a                               |
| FBN1                            | mir-133a , mir-29c , mir-133b                             | HNRNPA3                         | mir-30b , mir-1 , mir-30e                         |
| SLC43A2                         | mir-29c                                                   | NAB1                            | mir-1                                             |
| PGAM1                           | mir-1                                                     | TWF1                            | mir-30b , mir-1 , mir-30e                         |
| CAMK1D                          | mir-29c                                                   | COL5A1                          | mir-29c                                           |

|                                     |                                         |                                      |                                                 |
|-------------------------------------|-----------------------------------------|--------------------------------------|-------------------------------------------------|
| TRPS1                               | mir-30b , mir-1 , mir-30e               | SERP1                                | mir-1                                           |
| CSGALNACT2                          | mir-29c                                 | FZD7                                 | mir-1                                           |
| H3F3B                               | mir-208a , mir-378 , mir-1              | SUPT16H                              | mir-133a , mir-133b                             |
| FYB                                 | mir-1                                   | LASS6                                | mir-30b , mir-30e                               |
| DSEL                                | mir-30b , mir-30e                       | PDGFC                                | mir-29c                                         |
| ELN                                 | mir-29c                                 | FAF2                                 | mir-133a , mir-30b , mir-1 , mir-133b , mir-30e |
| GAS7                                | mir-29c                                 | ADAMTS10                             | mir-29c                                         |
| THBS1                               | mir-1                                   | C1QTNF6 , CTRP6                      | mir-29c                                         |
| MMP2                                | mir-29c                                 | DUSP5                                | mir-133a , mir-133b                             |
| ANXA4                               | mir-1                                   | ZNF230 , RNF141                      | mir-29c , mir-1                                 |
| RAP1B , LOC643752                   | mir-30b , mir-30e                       | SLC30A4                              | mir-30b , mir-30e                               |
| ZC3H7A                              | mir-133a , mir-133b                     | IFI30                                | mir-29c                                         |
| MSN , MSN/ALK fusion                | mir-133a , mir-133b                     | TCF12 , DKFZp451F163                 | mir-208b , mir-208a                             |
| SOX5 , L-SOX5                       | mir-208a                                | MRAS                                 | mir-1                                           |
| HNRNPA3                             | mir-30b , mir-1 , mir-30e               | CAP1                                 | mir-133a , mir-1 , mir-133b                     |
| NAB1                                | mir-1                                   | CAMK2N1 , CaMKIINalpha               | mir-30b , mir-30e                               |
| TWF1                                | mir-30b , mir-1 , mir-30e               | ABCA1                                | mir-1                                           |
| COL5A1                              | mir-29c                                 | TBETAR1 , TGFBR1                     | mir-208b , mir-208a , mir-133a , mir-133b       |
| COL4A1                              | mir-29c                                 | PIP4K2A                              | mir-30b , mir-30e                               |
| CBL                                 | mir-378 , mir-1                         | KIF5B                                | mir-208b , mir-208a                             |
| SERP1                               | mir-1                                   | RRBP1 , KIAA1398                     | mir-1                                           |
| FZD7                                | mir-1                                   | MYR12 , MYO5A                        | mir-30b , mir-30e                               |
| LASS6                               | mir-30b , mir-30e                       | PGM1                                 | mir-30b , mir-30e                               |
| SPRY1                               | mir-29c                                 | LEPR , LEPROT                        | mir-30b , mir-30e                               |
| SLC1A2                              | mir-30b , mir-29c , mir-30e             | ELMO1                                | mir-133a , mir-30b , mir-133b , mir-30e         |
| PDGFC                               | mir-29c                                 | NFATC4                               | mir-29c                                         |
| VAV3 , VAV-3                        | mir-208a , mir-30b , mir-30e            | MORF4L2                              | mir-29c                                         |
| SLC2A13 , Hmit                      | mir-1                                   | ACACA                                | mir-29c                                         |
| M25785 , PDGFRB , NIN/PDGFRB fusion | mir-30b , mir-29c , mir-30e             | KIRREL                               | mir-29c                                         |
| ADAMTS10                            | mir-29c                                 | LPP                                  | mir-30b , mir-30e                               |
| C1QTNF6 , CTRP6                     | mir-29c                                 | DKFZp686D23123 , COL6A3              | mir-29c                                         |
| QSER1                               | mir-378                                 | CNOT6                                | mir-30b , mir-29c , mir-30e                     |
| RIC3                                | mir-29c                                 | ATP6V1A                              | mir-29c , mir-1                                 |
| ZNF230 , RNF141                     | mir-29c , mir-1                         | BICC1                                | mir-133a , mir-133b                             |
| SLC30A4                             | mir-30b , mir-30e                       | PALM2                                | mir-30b , mir-29c , mir-30e                     |
| FAM105B                             | mir-29c                                 | MAN1A2                               | mir-133a , mir-30b , mir-133b , mir-30e         |
| PDE5A                               | mir-30b , mir-30e                       | DIO2                                 | mir-30b , mir-29c , mir-30e                     |
| IFI30                               | mir-29c                                 | TSPAN17                              | mir-378                                         |
| TCF12 , DKFZp451F163                | mir-208a                                | PPAPDC1B                             | mir-30b , mir-30e                               |
| MRAS                                | mir-1                                   | JK , TAOK3                           | mir-1                                           |
| CAP1                                | mir-133a , mir-1 , mir-133b             | SNAI1                                | mir-30b , mir-30e                               |
| CAMK2N1 , CaMKIINalpha              | mir-30b , mir-30e                       | GPR124 , KIAA1531                    | mir-30b , mir-30e                               |
| ABCA1                               | mir-1                                   | IGnT2 , GCNT2                        | mir-30b , mir-30e                               |
| HIVEP1                              | mir-30b , mir-30e                       | GMFB                                 | mir-29c , mir-1                                 |
| TBETAR1 , TGFBR1                    | mir-208a , mir-133a , mir-133b          | PRELP                                | mir-29c                                         |
| PIP4K2A                             | mir-30b , mir-30e                       | GNB4                                 | mir-133a , mir-29c , mir-133b                   |
| KIF5B                               | mir-208a                                | BMP2                                 | mir-378                                         |
| RRBP1 , KIAA1398                    | mir-1                                   | GTF2H1                               | mir-30b , mir-30e                               |
| MYR12 , MYO5A                       | mir-30b , mir-30e                       | PGD                                  | mir-1                                           |
| PGM1                                | mir-30b , mir-30e                       | KIAA0877 , AJ011981 , DPY19L1        | mir-30b , mir-30e                               |
| LEPR , LEPROT                       | mir-30b , mir-30e                       | CYLD                                 | mir-133a , mir-133b                             |
| ELMO1                               | mir-133a , mir-30b , mir-133b , mir-30e | COL4A2                               | mir-29c                                         |
| DTX4                                | mir-29c                                 | PFTK1 , KIAA0834                     | mir-208b , mir-208a , mir-1                     |
| NFATC4                              | mir-29c                                 | TIMP2                                | mir-30b , mir-30e                               |
| ZMIZ1                               | mir-29c                                 | AKAP13 , c-lbc                       | mir-29c                                         |
| MORF4L2                             | mir-29c                                 | DAP                                  | mir-1                                           |
| PVRL1                               | mir-29c                                 | FNDC3A , KIAA0970                    | mir-208b , mir-208a , mir-30b , mir-1 , mir-30e |
| ACACA                               | mir-29c                                 | Nbla10230/alpha-L-fucosidase , FUCA1 | mir-30b , mir-30e                               |
| KIRREL                              | mir-29c                                 | CTGF                                 | mir-133a , mir-133b                             |
| MLLT11                              | mir-29c                                 | CR618817 , SNTB2                     | mir-30b , mir-29c , mir-30e                     |
| LPP                                 | mir-30b , mir-30e                       | MAPRE1                               | mir-29c                                         |

|                                      |                                         |                                  |                                                 |
|--------------------------------------|-----------------------------------------|----------------------------------|-------------------------------------------------|
| GNG12                                | mir-29c                                 | NOTCH2 , N2 , NOTCH2NL           | mir-29c                                         |
| SOX9                                 | mir-30b , mir-1 , mir-30e               | NAV1                             | mir-30b , mir-29c , mir-30e                     |
| DKFZp686D23123 , COL6A3              | mir-29c                                 | COL4A4                           | mir-29c                                         |
| AZIN1                                | mir-30b , mir-1 , mir-30e               | IGFBP5                           | mir-1                                           |
| TSPAN9                               | mir-29c , mir-1                         | ANXA2                            | mir-1                                           |
| HMGCR                                | mir-1                                   | KIAA0569 , ZEB2                  | mir-208b , mir-208a , mir-30b , mir-30e         |
| EVI5                                 | mir-30b , mir-30e                       | ARL4C                            | mir-30b , mir-30e                               |
| AR                                   | mir-30b , mir-30e                       | ATP8B1                           | mir-30b , mir-30e                               |
| CNOT6                                | mir-30b , mir-29c , mir-30e             | HTRA3                            | mir-30b , mir-30e                               |
| ATP6V1A                              | mir-29c , mir-1                         | THBS2                            | mir-30b , mir-30e                               |
| CCND1                                | mir-1                                   | ITSN1 , DKFZp686J17173 , ITSN    | mir-30b , mir-30e                               |
| BICC1                                | mir-133a , mir-133b                     | DKFZp564O0582 , ATP6AP2          | mir-133a , mir-133b                             |
| PALM2                                | mir-30b , mir-29c , mir-30e             | SLC38A1                          | mir-378                                         |
| SLC5A3                               | mir-30b , mir-1 , mir-30e               | ADRBK2                           | mir-1                                           |
| MAN1A2                               | mir-133a , mir-30b , mir-133b , mir-30e | CAPZA1                           | mir-30b , mir-30e                               |
| DIO2                                 | mir-30b , mir-29c , mir-30e             | U48725 , U48729 , EGFR           | mir-133a , mir-133b                             |
| TSPAN17                              | mir-378                                 | RAH14 , KIAA1334                 | mir-30b , mir-30e                               |
| PPAPDC1B                             | mir-30b , mir-30e                       | GFPT2                            | mir-30b , mir-30e                               |
| JK1 , TAOK3                          | mir-1                                   | ITPK1                            | mir-30b , mir-30e                               |
| SNAI1                                | mir-30b , mir-30e                       | UNC13B variant protein , UNC13B  | mir-29c                                         |
| EIF5A2                               | mir-30b , mir-30e                       | ABI1                             | mir-208b , mir-208a                             |
| CALU                                 | mir-30b , mir-30e                       | COL5A2                           | mir-29c                                         |
| MTMR12                               | mir-1                                   | WIPF1                            | mir-30b , mir-30e                               |
| GPR124 , KIAA1531                    | mir-30b , mir-30e                       | ATP8B2                           | mir-30b , mir-30e                               |
| AKT3 , BC019085                      | mir-29c                                 | TLL7                             | mir-30b , mir-30e                               |
| KIAA0517 , TRIM2                     | mir-1                                   | KTELC1                           | mir-30b , mir-30e                               |
| DLG5 , KIAA0583                      | mir-30b , mir-30e                       | OTUB2                            | mir-29c                                         |
| POLE3                                | mir-29c                                 | TXNDC5                           | mir-133a , mir-30b , mir-133b , mir-30e         |
| KIAA0308 , CHD9                      | mir-208a                                | LOC647099 , RPL23A               | mir-378                                         |
| IGNT2 , GCNT2                        | mir-30b , mir-30e                       | EDEM1                            | mir-133a , mir-133b                             |
| GMBF                                 | mir-29c , mir-1                         | TIAM1                            | mir-29c                                         |
| LHFPL2                               | mir-30b , mir-30e                       | AML1 , RUNX1 , AML1/AMP19 fusion | mir-30b , mir-30e                               |
| PRELP                                | mir-29c                                 | PDCD4                            | mir-208b , mir-208a , mir-1                     |
| PLEKHG2                              | mir-378                                 | robo1 , ROBO1                    | mir-29c                                         |
| ZCCHC24                              | mir-30b , mir-30e                       | ARID5B                           | mir-30b , mir-30e                               |
| hNedd5 , SEPT2                       | mir-1                                   | ARRDC4                           | mir-29c                                         |
| MIB1                                 | mir-30b , mir-29c , mir-30e             | KCNN3                            | mir-208b , mir-208a                             |
| BMP2                                 | mir-378                                 | COL1A2                           | mir-29c                                         |
| GTF2H1                               | mir-30b , mir-30e                       | STX2                             | mir-30b , mir-30e                               |
| NT5E                                 | mir-30b , mir-30e                       | ITGA11                           | mir-29c                                         |
| PGD                                  | mir-1                                   | SNX10                            | mir-30b , mir-30e                               |
| KIAA0877 , AJ011981 , DPY19L1        | mir-30b , mir-30e                       | LYST                             | mir-30b , mir-30e                               |
| CYLD                                 | mir-133a , mir-133b                     | PFKFB3 , IPFK-2                  | mir-133a , mir-133b                             |
| COL4A2                               | mir-29c                                 | ACTN1                            | mir-30b , mir-30e                               |
| SLC16A3                              | mir-1                                   | DKFZp727A181 , SRXN1             | mir-1                                           |
| RASSF4 , DKFZp667E1116               | mir-30b , mir-30e                       | NR4A3                            | mir-1                                           |
| PFTK1 , KIAA0834                     | mir-208a , mir-1                        | CRISPLD1                         | mir-29c                                         |
| TIMP2                                | mir-30b , mir-30e                       | ATP2B4                           | mir-29c                                         |
| AKAP13 , c-lbc                       | mir-29c                                 | DNAJB11                          | mir-29c                                         |
| PLEKHO2                              | mir-30b , mir-1 , mir-30e               | GLIS2                            | mir-29c , mir-1                                 |
| SMAP1                                | mir-30b , mir-1 , mir-30e               | SLC44A1                          | mir-1                                           |
| DAP                                  | mir-1                                   | MICAL1                           | mir-30b , mir-30e                               |
| FNDC3A , KIAA0970                    | mir-208a , mir-30b , mir-1 , mir-30e    | FSTL1                            | mir-29c                                         |
| Nbla10230/alpha-L-fucosidase , FUCA1 | mir-30b , mir-30e                       | SH3RF3                           | mir-29c                                         |
| ACVR1                                | mir-30b , mir-30e                       | CKAP4                            | mir-133a , mir-133b                             |
| DDEF2                                | mir-29c                                 | ABHD2                            | mir-30b , mir-1 , mir-30e                       |
| CTGF                                 | mir-133a , mir-133b                     | NMT2                             | mir-1                                           |
| CR618817 , SNTB2                     | mir-30b , mir-29c , mir-30e             | KIAA1258 , GDA                   | mir-30b , mir-30e                               |
| SFXN1                                | mir-30b , mir-30e                       | WDR44                            | mir-30b , mir-30e                               |
| MAPRE1                               | mir-29c                                 | VAT1                             | mir-133a , mir-30b , mir-1 , mir-133b , mir-30e |

|                                  |                                         |                                  |                                                   |
|----------------------------------|-----------------------------------------|----------------------------------|---------------------------------------------------|
| NOTCH2 , N2 , NOTCH2NL           | mir-29c                                 | CDC42SE1                         | mir-1                                             |
| NAV1                             | mir-30b , mir-29c , mir-30e             | hFKHLB , FOXP1                   | mir-133a , mir-1 , mir-133b                       |
| COL4A4                           | mir-29c                                 | SPARC                            | mir-29c                                           |
| IGFBP5                           | mir-1                                   | ITGA5                            | mir-30b , mir-30e                                 |
| RAB5C                            | mir-208a , mir-133a , mir-133b          | RBPJ                             | mir-133a , mir-133b                               |
| HBEGF                            | mir-29c                                 | CX3CL1                           | mir-29c                                           |
| FAM46A                           | mir-133a , mir-30b , mir-133b , mir-30e | LDLR                             | mir-30b , mir-30e                                 |
| ANXA2                            | mir-1                                   | KLF10                            | mir-30b , mir-30e                                 |
| KIAA0569 , ZEB2                  | mir-208a , mir-30b , mir-30e            | CLCN5                            | mir-29c                                           |
| ARL4C                            | mir-30b , mir-30e                       | KIAA0709 , MRC2                  | mir-133a , mir-133b                               |
| ATP8B1                           | mir-30b , mir-30e                       | DKFZp434I0916 , SULF1 , KIAA1077 | mir-378 , mir-1                                   |
| HTRA3                            | mir-30b , mir-30e                       | SEC23B                           | mir-1                                             |
| THBS2                            | mir-30b , mir-30e                       | SLC7A11                          | mir-30b , mir-30e                                 |
| SRGAP3 , KIAA0411                | mir-133a , mir-30b , mir-133b , mir-30e | MFAP2                            | mir-29c                                           |
| SRI                              | mir-1                                   | PMP22                            | mir-29c                                           |
| ITSN1 , DKFZp686J17173 , ITSN    | mir-30b , mir-30e                       | SEL-OB , SVEP1                   | mir-29c                                           |
| DKFZp564O0582 , ATP6AP2          | mir-133a , mir-133b                     | ARF3                             | mir-1                                             |
| SLC38A1                          | mir-378                                 | GATM                             | mir-30b , mir-30e                                 |
| CLTC                             | mir-1                                   | GAB2                             | mir-29c                                           |
| CAPZA1                           | mir-30b , mir-30e                       | COL1A1                           | mir-133a , mir-29c , mir-133b                     |
| BCL2                             | mir-30b , mir-30e                       | B4GALT5                          | mir-30b , mir-30e                                 |
| U48725 , U48729 , EGFR           | mir-133a , mir-133b                     | AFF2                             | mir-29c                                           |
| PIK3C2A                          | mir-133a , mir-1 , mir-133b             | ADAMTS5                          | mir-133a , mir-30b , mir-29c , mir-133b , mir-30e |
| PI15                             | mir-29c                                 | KIAA1072 , PPM1E                 | mir-29c                                           |
| RAI14 , KIAA1334                 | mir-30b , mir-30e                       | ABI3BP                           | mir-30b , mir-30e                                 |
| GFPT2                            | mir-30b , mir-30e                       | ODZ3                             | mir-30b , mir-30e                                 |
| ITPK1                            | mir-30b , mir-30e                       | PHF21A , KIAA1696                | mir-29c                                           |
| UNC13B variant protein , UNC13B  | mir-29c                                 | ape , CCDC88A , KIAA1212         | mir-29c                                           |
| RAB34                            | mir-133a , mir-133b                     | EPS15                            | mir-133a , mir-29c , mir-133b                     |
| ABII                             | mir-208a                                | VKORC1                           | mir-133a , mir-133b                               |
| MFAP3                            | mir-29c                                 | COL16A1                          | mir-29c                                           |
| HN1 , ARM2                       | mir-29c                                 | TMEM183B , TMEM183A , CR591805   | mir-29c                                           |
| MAP3K3                           | mir-133a , mir-133b                     | PON2                             | mir-30b , mir-30e                                 |
| COL5A2                           | mir-29c                                 | SH3BGRL3                         | mir-1                                             |
| WIPF1                            | mir-30b , mir-30e                       | TUBB2A                           | mir-29c                                           |
| ATP8B2                           | mir-30b , mir-30e                       | COL4A5                           | mir-29c                                           |
| TTLL7                            | mir-30b , mir-30e                       | KIAA0746                         | mir-30b , mir-30e                                 |
| CR601042 , ARHGDI1A              | mir-133a , mir-133b                     | LHFP                             | mir-133a , mir-133b                               |
| KIAA1160 , RAB43 , ISY1          | mir-1                                   | GLT8D4                           | mir-29c                                           |
| KTELC1                           | mir-30b , mir-30e                       | LOXL2                            | mir-29c                                           |
| CUL2                             | mir-30b , mir-30e                       | LOXL4                            | mir-133a , mir-29c , mir-133b                     |
| OTUB2                            | mir-29c                                 | NCAM1                            | mir-30b , mir-30e                                 |
| ADAM19                           | mir-30b , mir-29c , mir-30e             | STXBP1                           | mir-30b , mir-30e                                 |
| USP6NL                           | mir-29c                                 | MAP3K12                          | mir-30b , mir-30e                                 |
| TXNDC5                           | mir-133a , mir-30b , mir-133b , mir-30e | SPTLC2                           | mir-133a , mir-30b , mir-29c , mir-133b , mir-30e |
| LOC647099 , RPL23A               | mir-378                                 | CPEB1                            | mir-1                                             |
| EDEM1                            | mir-133a , mir-133b                     | RPS6KA3                          | mir-29c                                           |
| TIAM1                            | mir-29c                                 | MYH9                             | mir-133a , mir-133b                               |
| AML1 , RUNX1 , AML1/AMP19 fusion | mir-30b , mir-30e                       | DACT1                            | mir-378 , mir-30b , mir-30e                       |
| PDCD4                            | mir-208a , mir-1                        | FGFR1 , MST123                   | mir-133a , mir-133b                               |
| robo1 , ROBO1                    | mir-29c                                 | DKFZp313F1012 , SEC61A1          | mir-1                                             |
| ARID5B                           | mir-30b , mir-30e                       | P4HA1                            | mir-30b , mir-30e                                 |
| KCNN3                            | mir-208a                                | GNA13                            | mir-30b , mir-29c , mir-30e                       |
| COL1A2                           | mir-29c                                 | TTC8 , DKFZp434K1118             | mir-30b , mir-30e                                 |
| STX2                             | mir-30b , mir-30e                       | FARP1                            | mir-133a , mir-133b                               |
| ITGA11                           | mir-29c                                 | EMP1                             | mir-29c                                           |
| RASGEF1A                         | mir-30b , mir-30e                       | ETV6                             | mir-29c                                           |
| SNX10                            | mir-30b , mir-30e                       | PIK3R2                           | mir-30b , mir-30e                                 |
| LYST                             | mir-30b , mir-30e                       | CBLB , Nbla00127                 | mir-30b , mir-30e                                 |
| PFKFB3 , IPFK-2                  | mir-133a , mir-133b                     | TNFRSF1A                         | mir-29c                                           |
| ACTN1                            | mir-30b , mir-30e                       | GLCCI1                           | mir-30b , mir-1 , mir-30e                         |



|                                        |                                                   |                                     |                                                             |
|----------------------------------------|---------------------------------------------------|-------------------------------------|-------------------------------------------------------------|
| NKTR , DKFZp686J06106 , DKFZp686N24126 | mir-30b , mir-29c , mir-30e                       | FNDC3B , fad104                     | mir-30b , mir-1 , mir-30e                                   |
| PKNOX2                                 | mir-30b , mir-29c , mir-30e                       | IGF1R                               | mir-133a , mir-378 , mir-30b , mir-133b , mir-30e           |
| DKFZp727A181 , SRXN1                   | mir-1                                             | KIAA1482 , STIM2                    | mir-30b , mir-30e                                           |
| CRISPLD1                               | mir-29c                                           | SLC41A2                             | mir-30b , mir-30e                                           |
| ATP2B4                                 | mir-29c                                           | CAMKK2                              | mir-30b , mir-29c , mir-30e                                 |
| DNAJB11                                | mir-29c                                           | LAMC1                               | mir-29c                                                     |
| GLIS2                                  | mir-29c , mir-1                                   | XYLT1                               | mir-133a , mir-133b                                         |
| SLC44A1                                | mir-1                                             | AP3S1                               | mir-30b , mir-30e                                           |
| MICAL1                                 | mir-30b , mir-30e                                 | YEA4 , SLC35B4                      | mir-30b , mir-1 , mir-30e                                   |
| PEL1 , AK026714                        | mir-30b , mir-30e                                 | SH3PXD2B                            | mir-133a , mir-29c , mir-1 , mir-133b                       |
| FSTL1                                  | mir-29c                                           | AK095546 , TPM4                     | mir-133a , mir-133b                                         |
| SH3RF3                                 | mir-29c                                           | ENAH                                | mir-208b , mir-208a , mir-378 , mir-30b , mir-29c , mir-30e |
| SORBS3                                 | mir-133a , mir-133b                               | KIAA0534 , ATRNL1                   | mir-30b , mir-30e                                           |
| GAN                                    | mir-30b , mir-1 , mir-30e                         | RNF213 , KIAA1554                   | mir-1                                                       |
| CKAP4                                  | mir-133a , mir-133b                               | COL15A1                             | mir-29c                                                     |
| ABHD2                                  | mir-30b , mir-1 , mir-30e                         | SERPINE1 , BX649164 , BC005927      | mir-30b , mir-30e                                           |
| NMT2                                   | mir-1                                             | PIIB                                | mir-1                                                       |
| NEGR1                                  | mir-30b , mir-29c , mir-30e                       | COL3A1                              | mir-29c                                                     |
| TM9SF3                                 | mir-133a , mir-133b                               | GNAI2 , WUGSC:H_LUCA15.1            | mir-30b , mir-30e                                           |
| KIAA1258 , GDA                         | mir-30b , mir-30e                                 | ATP7A                               | mir-29c                                                     |
| KIAA0449 , KIF21B                      | mir-30b , mir-30e                                 | SCRN1                               | mir-208b , mir-208a                                         |
| WDR44                                  | mir-30b , mir-30e                                 | MARCKS                              | mir-30b , mir-1 , mir-30e                                   |
| VAT1                                   | mir-133a , mir-30b , mir-1 , mir-133b , mir-30e   | PTBP1                               | mir-133a , mir-1 , mir-133b                                 |
| CDC42SE1                               | mir-1                                             | SLC7A8 , hLAT2                      | mir-133a , mir-133b                                         |
| HMG3                                   | mir-29c                                           | DBNL , CMAP                         | mir-133a , mir-133b                                         |
| hFKHLB , FOXP1                         | mir-133a , mir-1 , mir-133b                       | CYB561                              | mir-30b , mir-30e                                           |
| SPARC                                  | mir-29c                                           | EEF1A1L14 , EEF1A1                  | mir-133a , mir-133b                                         |
| ITGA5                                  | mir-30b , mir-30e                                 | SFRP1                               | mir-1                                                       |
| DDAH1                                  | mir-30b , mir-30e                                 | TAGLN2                              | mir-133a , mir-1 , mir-133b                                 |
| RBPJ                                   | mir-133a , mir-133b                               | AX747733 , CTTNBP2NL , DKFZp547A023 | mir-1                                                       |
| CX3CL1                                 | mir-29c                                           | AMMECR1                             | mir-29c                                                     |
| LDLR                                   | mir-30b , mir-30e                                 | ARSB                                | mir-29c                                                     |
| CLCN5                                  | mir-29c                                           | CASP3                               | mir-30b , mir-30e                                           |
| FLJ00147 , USP47                       | mir-30b , mir-30e                                 | DPYSL2                              | mir-30b , mir-29c , mir-30e                                 |
| KIAA0709 , MRC2                        | mir-133a , mir-133b                               | STK38L , KIAA0965                   | mir-29c                                                     |
| DKFZp434I0916 , SULF1 , KIAA1077       | mir-378 , mir-1                                   | PTGFRN                              | mir-30b , mir-30e                                           |
| SEC23B                                 | mir-1                                             | UST                                 | mir-30b , mir-1 , mir-30e                                   |
| SLC7A11                                | mir-30b , mir-30e                                 | IL17RD                              | mir-29c                                                     |
| MFAP2                                  | mir-29c                                           | NAPIL1                              | mir-208b , mir-208a                                         |
| CCND2                                  | mir-29c , mir-1                                   | PITPNA                              | mir-29c                                                     |
| PMP22                                  | mir-29c                                           | SLC39A1                             | mir-133a , mir-133b                                         |
| SEL-OB , SVEP1                         | mir-29c                                           | AFF3 , CR596530                     | mir-30b , mir-30e                                           |
| HS2ST1                                 | mir-133a , mir-133b                               | KIF3B                               | mir-29c                                                     |
| KIF3C                                  | mir-133a , mir-30b , mir-133b , mir-30e           | PTPRZ1                              | mir-133a , mir-133b                                         |
| SPRED1                                 | mir-1                                             | FRZB                                | mir-30b , mir-30e                                           |
| REPS2                                  | mir-29c                                           | RAB4B                               | mir-30b , mir-30e                                           |
| ARF3                                   | mir-1                                             |                                     |                                                             |
| GATM                                   | mir-30b , mir-30e                                 |                                     |                                                             |
| GAB2                                   | mir-29c                                           |                                     |                                                             |
| COL1A1                                 | mir-133a , mir-29c , mir-133b                     |                                     |                                                             |
| EML4                                   | mir-208a , mir-30b , mir-29c , mir-1 , mir-30e    |                                     |                                                             |
| PRKAR1A                                | mir-30b , mir-30e                                 |                                     |                                                             |
| B4GALT5                                | mir-30b , mir-30e                                 |                                     |                                                             |
| AFF2                                   | mir-29c                                           |                                     |                                                             |
| CNN2                                   | mir-133a , mir-133b                               |                                     |                                                             |
| B4GALT6                                | mir-30b , mir-30e                                 |                                     |                                                             |
| PTPN13                                 | mir-30b , mir-30e                                 |                                     |                                                             |
| ADAMTS5                                | mir-133a , mir-30b , mir-29c , mir-133b , mir-30e |                                     |                                                             |

|                                   |                                                      |  |  |
|-----------------------------------|------------------------------------------------------|--|--|
| LG12                              | mir-29c                                              |  |  |
| KIAA1072 , PPM1E                  | mir-29c                                              |  |  |
| ABI3BP                            | mir-30b , mir-30e                                    |  |  |
| LASS2                             | mir-133a , mir-1 , mir-133b                          |  |  |
| CHSY1                             | mir-29c                                              |  |  |
| B3GALNT1                          | mir-133a , mir-133b                                  |  |  |
| ODZ3                              | mir-30b , mir-30e                                    |  |  |
| PHF21A , KIAA1696                 | mir-29c                                              |  |  |
| CSNK1G3                           | mir-133a , mir-133b                                  |  |  |
| ape , CCDC88A , KIAA1212          | mir-29c                                              |  |  |
| ERLIN1                            | mir-30b , mir-30e                                    |  |  |
| EPS15                             | mir-133a , mir-29c , mir-133b                        |  |  |
| VKORC1                            | mir-133a , mir-133b                                  |  |  |
| DKFZp566F223 , TUBB2B             | mir-29c                                              |  |  |
| KIF3A                             | mir-30b , mir-30e                                    |  |  |
| TBL1X                             | mir-133a , mir-30b , mir-133b ,<br>mir-30e           |  |  |
| COL16A1                           | mir-29c                                              |  |  |
| TMEM183B , TMEM183A ,<br>CR591805 | mir-29c                                              |  |  |
| PON2                              | mir-30b , mir-30e                                    |  |  |
| SH3BGRL3                          | mir-1                                                |  |  |
| ROD1                              | mir-133a , mir-30b , mir-29c ,<br>mir-133b , mir-30e |  |  |
| TUBB2A                            | mir-29c                                              |  |  |
| COL4A5                            | mir-29c                                              |  |  |
| MYO9B variant protein ,<br>MYO9B  | mir-133a , mir-133b                                  |  |  |
| KIAA0746                          | mir-30b , mir-30e                                    |  |  |
| LHFP                              | mir-133a , mir-133b                                  |  |  |
| PPP1R9B                           | mir-133a , mir-133b                                  |  |  |
| NAALADL2                          | mir-30b , mir-1 , mir-30e                            |  |  |
| GLT8D4                            | mir-29c                                              |  |  |
| HLTF                              | mir-133a , mir-133b                                  |  |  |
| SNX6                              | mir-30b , mir-30e                                    |  |  |
| CDK6                              | mir-29c , mir-1                                      |  |  |
| TULP4                             | mir-133a , mir-30b , mir-133b ,<br>mir-30e           |  |  |
| LOXL2                             | mir-29c                                              |  |  |
| RAG1AP1                           | mir-133a , mir-133b                                  |  |  |
| NUAK1                             | mir-30b , mir-30e                                    |  |  |
| WDFY1                             | mir-29c                                              |  |  |
| LOXL4                             | mir-133a , mir-29c , mir-133b                        |  |  |
| ANP32B                            | mir-1                                                |  |  |
| NCAM1                             | mir-30b , mir-30e                                    |  |  |
| STXBP1                            | mir-30b , mir-30e                                    |  |  |
| MST023 , KIAA0833 ,<br>CAMTA1     | mir-30b , mir-29c , mir-30e                          |  |  |
| MAP3K12                           | mir-30b , mir-30e                                    |  |  |
| PP187 , FBN2                      | mir-133a , mir-133b                                  |  |  |
| SPTLC2                            | mir-133a , mir-30b , mir-29c ,<br>mir-133b , mir-30e |  |  |
| CPEB1                             | mir-1                                                |  |  |
| RPS6KA3                           | mir-29c                                              |  |  |
| MYH9                              | mir-133a , mir-133b                                  |  |  |
| DACT1                             | mir-378 , mir-30b , mir-30e                          |  |  |
| FGFR1 , MST123                    | mir-133a , mir-133b                                  |  |  |
| DKFZp313F1012 , SEC61A1           | mir-1                                                |  |  |
| P4HA1                             | mir-30b , mir-30e                                    |  |  |
| GNA13                             | mir-30b , mir-29c , mir-30e                          |  |  |
| TTC8 , DKFZp434K1118              | mir-30b , mir-30e                                    |  |  |
| FARP1                             | mir-133a , mir-133b                                  |  |  |
| CREB5                             | mir-133a , mir-29c , mir-1 , mir-<br>133b            |  |  |
| OK/SW-cl.14 , CALD1               | mir-30b , mir-30e                                    |  |  |
| TNFAIP3                           | mir-29c                                              |  |  |
| NEUROD1                           | mir-378 , mir-30b , mir-30e                          |  |  |
| PML                               | mir-133a , mir-133b                                  |  |  |
| EMP1                              | mir-29c                                              |  |  |
| KCTD10                            | mir-1                                                |  |  |

|                                        |                                                      |  |  |
|----------------------------------------|------------------------------------------------------|--|--|
| ETV6                                   | mir-29c                                              |  |  |
| PIK3R2                                 | mir-30b , mir-30e                                    |  |  |
| TNFRSF1A                               | mir-29c                                              |  |  |
| CTNND1                                 | mir-29c                                              |  |  |
| TTC9                                   | mir-29c                                              |  |  |
| GLCC11                                 | mir-30b , mir-1 , mir-30e                            |  |  |
| SETBP1                                 | mir-1                                                |  |  |
| FNDC3B , fad104                        | mir-30b , mir-1 , mir-30e                            |  |  |
| IGF1R                                  | mir-133a , mir-378 , mir-30b ,<br>mir-133b , mir-30e |  |  |
| TMEM49 , DJ087819                      | mir-1                                                |  |  |
| KIAA1482 , STIM2                       | mir-30b , mir-30e                                    |  |  |
| SLC41A2                                | mir-30b , mir-30e                                    |  |  |
| CAMKK2                                 | mir-30b , mir-29c , mir-30e                          |  |  |
| LAMC1                                  | mir-29c                                              |  |  |
| XYLT1                                  | mir-133a , mir-133b                                  |  |  |
| SLC7A2                                 | mir-133a , mir-1 , mir-133b                          |  |  |
| TMEM123                                | mir-133a , mir-133b                                  |  |  |
| INTS2                                  | mir-30b , mir-30e                                    |  |  |
| HIATL1                                 | mir-29c                                              |  |  |
| AP3S1                                  | mir-30b , mir-30e                                    |  |  |
| YEA4 , SLC35B4                         | mir-30b , mir-1 , mir-30e                            |  |  |
| SH3PX2B                                | mir-133a , mir-29c , mir-1 , mir-<br>133b            |  |  |
| AK095546 , TPM4                        | mir-133a , mir-133b                                  |  |  |
| PRKAB2                                 | mir-29c                                              |  |  |
| ENAH                                   | mir-208a , mir-378 , mir-30b ,<br>mir-29c , mir-30e  |  |  |
| ID4                                    | mir-133a , mir-133b                                  |  |  |
| ELMO2                                  | mir-29c                                              |  |  |
| xpct , SLC16A2                         | mir-29c                                              |  |  |
| KIAA0534 , ATRNL1                      | mir-30b , mir-30e                                    |  |  |
| RNF213 , KIAA1554                      | mir-1                                                |  |  |
| SH3GL1                                 | mir-1                                                |  |  |
| COL15A1                                | mir-29c                                              |  |  |
| ITGB1                                  | mir-29c                                              |  |  |
| SERPINE1 , BX649164 ,<br>BC005927      | mir-30b , mir-30e                                    |  |  |
| IPO9                                   | mir-378 , mir-1                                      |  |  |
| PPIB                                   | mir-1                                                |  |  |
| COL3A1                                 | mir-29c                                              |  |  |
| PPIC                                   | mir-29c                                              |  |  |
| GNAI2 ,<br>WUGSC:H_LUCA15.1            | mir-30b , mir-30e                                    |  |  |
| POLA1                                  | mir-1                                                |  |  |
| DAGLA                                  | mir-30b , mir-30e                                    |  |  |
| ATP7A                                  | mir-29c                                              |  |  |
| SCRN1                                  | mir-208a                                             |  |  |
| ADAR                                   | mir-1                                                |  |  |
| MARCKS                                 | mir-30b , mir-1 , mir-30e                            |  |  |
| PTBP1                                  | mir-133a , mir-1 , mir-133b                          |  |  |
| SLC7A8 , hLAT2                         | mir-133a , mir-133b                                  |  |  |
| DBNL , CMAP                            | mir-133a , mir-133b                                  |  |  |
| CYB561                                 | mir-30b , mir-30e                                    |  |  |
| EEF1A1L14 , EEF1A1                     | mir-133a , mir-133b                                  |  |  |
| SFRP1                                  | mir-1                                                |  |  |
| TAGLN2                                 | mir-133a , mir-1 , mir-133b                          |  |  |
| PACS2                                  | mir-208a                                             |  |  |
| SRGAP2                                 | mir-29c , mir-1                                      |  |  |
| KCNMA1 , SAKCA                         | mir-29c                                              |  |  |
| AX747733 , CTTNBP2NL ,<br>DKFZp547A023 | mir-1                                                |  |  |
| AMMECR1                                | mir-29c                                              |  |  |
| ARSB                                   | mir-29c                                              |  |  |
| CASP3                                  | mir-30b , mir-30e                                    |  |  |
| DPYSL2                                 | mir-30b , mir-29c , mir-30e                          |  |  |
| SLC10A7 , DKFZp566M114                 | mir-208a , mir-1                                     |  |  |
| STK38L , KIAA0965                      | mir-29c                                              |  |  |
| PTGFRN                                 | mir-30b , mir-30e                                    |  |  |
| UST                                    | mir-30b , mir-1 , mir-30e                            |  |  |

|                 |                                                 |  |  |
|-----------------|-------------------------------------------------|--|--|
| IL17RD          | mir-29c                                         |  |  |
| ABI2 , argBPIB  | mir-1                                           |  |  |
| ORC2L           | mir-30b , mir-30e                               |  |  |
| NAP1L1          | mir-208a                                        |  |  |
| GAS2L1          | mir-1                                           |  |  |
| UBTD2           | mir-29c                                         |  |  |
| SLC39A1         | mir-133a , mir-133b                             |  |  |
| AFF3 , CR596530 | mir-30b , mir-30e                               |  |  |
| KIF3B           | mir-29c                                         |  |  |
| GCLC            | mir-133a , mir-30b , mir-1 , mir-133b , mir-30e |  |  |
| FRZB            | mir-30b , mir-30e                               |  |  |
| RAB4B           | mir-30b , mir-30e                               |  |  |

**Table S7: Putative mRNA targets for up-regulated miRNAs - 6 months**

| Arg 6 months                    |                                                     | GLY 6 months                    |                                                     |
|---------------------------------|-----------------------------------------------------|---------------------------------|-----------------------------------------------------|
| Down-regulated mRNAs            | Up-regulated miRNAs                                 | Down-regulated mRNAs            | Up-regulated miRNAs                                 |
| PPMIK                           | mir-23b , mir-23a                                   | PPMIK                           | mir-23b , mir-23a                                   |
| 214K23.2 , FRY , DKFZp686K08123 | mir-195 , mir-497                                   | 214K23.2 , FRY , DKFZp686K08123 | mir-195 , mir-497                                   |
| MARS2                           | mir-199a-3p                                         | MARS2                           | mir-199a-3p                                         |
| IDH3A , DKFZp761L1216           | mir-195 , mir-497                                   | PLAG1                           | mir-199a-3p , mir-195 , mir-497 , mir-21            |
| SEMA4B                          | mir-23b , mir-23a                                   | TGIF2                           | mir-199a-3p , mir-195 , mir-497                     |
| PLAG1                           | mir-199a-3p , mir-195 , mir-497 , mir-21            | MED12L                          | mir-199a-3p                                         |
| GHR                             | mir-195 , mir-497                                   | TRPM4B , TRPM4                  | mir-199a-5p                                         |
| KIAA1061 , FSTL4                | mir-199a-5p                                         | MRPS25                          | mir-199a-5p                                         |
| MED12L                          | mir-199a-3p                                         | SOBP                            | mir-195 , mir-497                                   |
| TRPM4B , TRPM4                  | mir-199a-5p                                         | PPIF                            | mir-23b , mir-23a , mir-195 , mir-497               |
| PIK3R1                          | mir-199a-3p , mir-195 , mir-497 , mir-21            | KIAA1284 , INTU                 | mir-23b , mir-23a                                   |
| pim-3 , PIM3                    | mir-195 , mir-497                                   | CLCN3                           | mir-23b , mir-23a                                   |
| ACOX1                           | mir-199a-3p , mir-195 , mir-497                     | ABCD2                           | mir-21                                              |
| VEGF41 , VEGFA                  | mir-199a-5p , mir-195 , mir-497                     | PTPN3                           | mir-199a-3p , mir-195 , mir-497                     |
| MIRK , DYRK1B                   | mir-195 , mir-497                                   | SLC35E1                         | mir-199a-5p                                         |
| MRPS25                          | mir-199a-5p                                         | TMEM38B                         | mir-23b , mir-23a                                   |
| SEMA3A                          | mir-199a-3p , mir-195 , mir-497                     | PKIA                            | mir-23b , mir-23a                                   |
| PPP1R9A                         | mir-199a-5p , mir-199a-3p                           | SNX16                           | mir-195 , mir-497                                   |
| TACC2                           | mir-199a-3p                                         | KY                              | mir-195 , mir-497                                   |
| SOBP                            | mir-195 , mir-497                                   | RREB1 , Zep-1                   | mir-23b , mir-199a-3p , mir-23a                     |
| PPIF                            | mir-23b , mir-23a , mir-195 , mir-497               | RAF1                            | mir-195 , mir-497                                   |
| KIAA1284 , INTU                 | mir-23b , mir-23a                                   | UBE2D1                          | mir-23b , mir-23a                                   |
| CLCN3                           | mir-23b , mir-23a                                   | ATG4D , APG4-D                  | mir-199a-5p                                         |
| ABCD2                           | mir-21                                              | PANK1                           | mir-195 , mir-497                                   |
| PTPN3                           | mir-199a-3p , mir-195 , mir-497                     | HMCN1 , FIBL-6                  | mir-199a-5p                                         |
| SLC35E1                         | mir-199a-5p                                         | JPH1                            | mir-21                                              |
| DKFZp451C023 , SRL              | mir-199a-5p , mir-21                                | KIAA1734 , UBE2O                | mir-23b , mir-23a                                   |
| TMEM38B                         | mir-23b , mir-23a                                   | ASRGL1                          | mir-199a-5p                                         |
| PKIA                            | mir-23b , mir-23a                                   | SPAG7                           | mir-195 , mir-497                                   |
| SNX16                           | mir-195 , mir-497                                   | KIAA0977 , COBLL1               | mir-195 , mir-497                                   |
| KY                              | mir-195 , mir-497                                   | BCL11A                          | mir-21                                              |
| CDKN1C                          | mir-199a-5p                                         | MFHAS1                          | mir-199a-5p , mir-23b , mir-23a                     |
| MSH2                            | mir-21                                              | TFAM                            | mir-199a-3p                                         |
| RREB1 , Zep-1                   | mir-23b , mir-199a-3p , mir-23a                     | MYO10                           | mir-199a-3p                                         |
| RAF1                            | mir-195 , mir-497                                   | ARHGAP20                        | mir-23b , mir-199a-3p , mir-23a , mir-195 , mir-497 |
| PLXNA2                          | mir-199a-5p , mir-195 , mir-497                     | SLC9A6                          | mir-195 , mir-497                                   |
| UBE2D1                          | mir-23b , mir-23a                                   | ADD3                            | mir-199a-5p                                         |
| ATG4D , APG4-D                  | mir-199a-5p                                         | FAM59A                          | mir-195 , mir-497                                   |
| PANK1                           | mir-195 , mir-497                                   | GPBP1L1                         | mir-199a-3p                                         |
| UBL3                            | mir-199a-5p , mir-23b , mir-23a , mir-195 , mir-497 | EPHA4                           | mir-21                                              |
| HMCN1 , FIBL-6                  | mir-199a-5p                                         | ATPAF1                          | mir-21                                              |
| JPH1                            | mir-21                                              | CSDC2                           | mir-199a-5p                                         |
| CTAGE5                          | mir-23b , mir-23a                                   | ZADH2                           | mir-195 , mir-497 , mir-21                          |
| KIAA1734 , UBE2O                | mir-23b , mir-23a                                   | HIGD1A                          | mir-195 , mir-497                                   |
| ASRGL1                          | mir-199a-5p                                         | FOXO4                           | mir-23b , mir-23a                                   |
| SPAG7                           | mir-195 , mir-497                                   | TBC1D4 , KIAA0603               | mir-199a-3p                                         |
| KIAA0977 , COBLL1               | mir-195 , mir-497                                   | DUSP8                           | mir-21                                              |
| CS                              | mir-23b , mir-23a                                   | HLF                             | mir-199a-5p                                         |
| FBXW7                           | mir-195 , mir-497                                   | B3GALT2                         | mir-23b , mir-23a                                   |
| DIXDC1 , KIAA1735               | mir-195 , mir-497                                   | TMEM66 , foap-7                 | mir-199a-5p                                         |
| BCL11A                          | mir-21                                              | DHTKD1                          | mir-195 , mir-497                                   |
| MFHAS1                          | mir-199a-5p , mir-23b , mir-23a                     | PAQR9 , AK093381                | mir-199a-5p , mir-23b , mir-23a                     |
| ELF2                            | mir-23b , mir-23a , mir-21                          | MMD                             | mir-195 , mir-497                                   |
| STAT5B                          | mir-23b , mir-23a                                   | DNMT3A                          | mir-199a-3p                                         |
| TBR III , TGFB3                 | mir-23b , mir-23a , mir-195 , mir-497               | KIAA1416 , CHD7                 | mir-23b , mir-23a , mir-195 , mir-497 , mir-21      |
| SMPD1                           | mir-195 , mir-497                                   | ARL2                            | mir-195 , mir-497                                   |
| TFAM                            | mir-199a-3p                                         | FBXO21                          | mir-195 , mir-497                                   |

|                     |                                                     |                                        |                                               |
|---------------------|-----------------------------------------------------|----------------------------------------|-----------------------------------------------|
| MYO10               | mir-199a-3p                                         | GNA12                                  | mir-199a-3p , mir-195 , mir-497               |
| ARHGAP20            | mir-23b , mir-199a-3p , mir-23a , mir-195 , mir-497 | CPEB2                                  | mir-23b , mir-23a , mir-195 , mir-497         |
| SLC9A6              | mir-195 , mir-497                                   | BCL11B                                 | mir-208b , mir-21                             |
| RBM24               | mir-199a-5p , mir-195 , mir-497                     | XPO4                                   | mir-195 , mir-497                             |
| ADD3                | mir-199a-5p                                         | SMARCD1                                | mir-199a-5p , mir-21                          |
| RAPGEF2             | mir-23b , mir-23a , mir-195 , mir-497               | ESRRG                                  | mir-23b , mir-23a , mir-195 , mir-497         |
| TARBP2              | mir-195 , mir-497                                   | AL832481 , MLLT6                       | mir-199a-3p , mir-195 , mir-497               |
| FAM59A              | mir-195 , mir-497                                   | TMEM135                                | mir-199a-5p                                   |
| GPBP1L1             | mir-199a-3p                                         | HNMT                                   | mir-199a-3p                                   |
| EPHA4               | mir-21                                              | ISOC1                                  | mir-195 , mir-497                             |
| ATPAF1              | mir-21                                              | AK3L1                                  | mir-195 , mir-497                             |
| CSDC2               | mir-199a-5p                                         | MITF , MITF-C                          | mir-23b , mir-23a                             |
| ARFGAP2 , Nbla10535 | mir-195 , mir-497                                   | CELSR2                                 | mir-199a-3p                                   |
| ZADH2               | mir-195 , mir-497 , mir-21                          | SESN1                                  | mir-195 , mir-497                             |
| CDC40               | mir-23b , mir-23a                                   | STEERIN2 , KIAA1419 , NAV2             | mir-208b                                      |
| IQGAP2              | mir-199a-3p                                         | LPHN2 , KIAA0786                       | mir-23b , mir-23a , mir-195 , mir-497         |
| FOXO4               | mir-23b , mir-23a                                   | MYO5C                                  | mir-23b , mir-23a                             |
| TBC1D4 , KIAA0603   | mir-199a-3p                                         | AK022285 , CASZ1                       | mir-195 , mir-497                             |
| DUSP8               | mir-21                                              | MMAB                                   | mir-199a-3p                                   |
| DLG                 | mir-23b , mir-23a                                   | SLC20A2                                | mir-199a-3p , mir-195 , mir-497               |
| HLF                 | mir-199a-5p                                         | AUH                                    | mir-23b , mir-23a                             |
| B3GALT2             | mir-23b , mir-23a                                   | KLHL3 , KIAA1129                       | mir-199a-5p , mir-199a-3p                     |
| TMEM66 , foap-7     | mir-199a-5p                                         | KCNK3                                  | mir-23b , mir-23a                             |
| DHTKD1              | mir-195 , mir-497                                   | CAV2                                   | mir-199a-3p                                   |
| PAQR9 , AK093381    | mir-199a-5p , mir-23b , mir-23a                     | PDE11A                                 | mir-199a-3p                                   |
| PRKCE               | mir-23b , mir-199a-3p , mir-23a , mir-21            | AKAP1                                  | mir-199a-5p                                   |
| DNMT3A              | mir-199a-3p                                         | HMG2                                   | mir-23b , mir-23a                             |
| TRIP10 , STP        | mir-195 , mir-497                                   | ESRRA                                  | mir-195 , mir-497                             |
| KIAA1416 , CHD7     | mir-23b , mir-23a , mir-195 , mir-497 , mir-21      | BLCAP                                  | mir-199a-5p , mir-23b , mir-23a               |
| PKP4                | mir-23b , mir-23a                                   | NTF3                                   | mir-21                                        |
| FBXO21              | mir-195 , mir-497                                   | MYLK4                                  | mir-195 , mir-497                             |
| GNA12               | mir-199a-3p , mir-195 , mir-497                     | SLC41A1                                | mir-208b                                      |
| PRDX3               | mir-23b , mir-23a                                   | ZYG11B                                 | mir-23b , mir-23a , mir-21                    |
| CPEB2               | mir-23b , mir-23a , mir-195 , mir-497               | ALOX12                                 | mir-195 , mir-497                             |
| BCL11B              | mir-21                                              | ASB15                                  | mir-23b , mir-23a                             |
| XPO4                | mir-195 , mir-497                                   | nifS , NFS1                            | mir-195 , mir-497                             |
| SMARCD1             | mir-199a-5p , mir-21                                | INSR                                   | mir-195 , mir-497                             |
| DNAJC16 , KIAA0962  | mir-195 , mir-497 , mir-21                          | SCN4A                                  | mir-208b                                      |
| BACH2               | mir-23b , mir-23a , mir-195 , mir-497               | LMO7 , AK123459 , KIAA0858             | mir-195 , mir-497                             |
| KCNJ2               | mir-195 , mir-497                                   | DLL4                                   | mir-195 , mir-497                             |
| ESRRG               | mir-23b , mir-23a , mir-195 , mir-497               | LLGL2                                  | mir-199a-3p                                   |
| GABPA               | mir-195 , mir-497                                   | USP2                                   | mir-195 , mir-497                             |
| AL832481 , MLLT6    | mir-199a-3p , mir-195 , mir-497                     | GLUD1                                  | mir-195 , mir-497                             |
| TMEM135             | mir-199a-5p                                         | TRIM63                                 | mir-23b , mir-23a                             |
| CDC37L1             | mir-195 , mir-497                                   | DKFZp547K152 , TMEM63B , DKFZp434P0531 | mir-199a-5p                                   |
| HNMT                | mir-199a-3p                                         | MST023 , KIAA0833 , CAMTA1             | mir-23b , mir-23a                             |
| ISOC1               | mir-195 , mir-497                                   | KIAA1675 , PRDM16                      | mir-199a-5p                                   |
| MITF , MITF-C       | mir-23b , mir-23a                                   | KIAA0366 , ADAMTS3                     | mir-199a-3p                                   |
| EIF4E               | mir-195 , mir-497                                   | ERBB4                                  | mir-199a-5p , mir-23b , mir-199a-3p , mir-23a |
| THRB                | mir-23b , mir-199a-3p , mir-23a , mir-21            | DEF8                                   | mir-195 , mir-497                             |
| CELSR2              | mir-199a-3p                                         | SCN4B                                  | mir-195 , mir-497                             |
| SESN1               | mir-195 , mir-497                                   | DKFZp434N1217 , SOX6                   | mir-208b                                      |
| LPHN2 , KIAA0786    | mir-23b , mir-23a , mir-195 , mir-497               | FAM73A                                 | mir-195 , mir-497                             |
| RMND5A              | mir-21                                              | LMOD3                                  | mir-23b , mir-23a                             |
| MYO5C               | mir-23b , mir-23a                                   | CEP68 , KIAA0582                       | mir-195 , mir-497                             |
| AK022285 , CASZ1    | mir-195 , mir-497                                   | CPEB3                                  | mir-195 , mir-497 , mir-21                    |
| WDR42A              | mir-195 , mir-497                                   | PPARA                                  | mir-21                                        |

|                                        |                                                     |                             |                                                     |
|----------------------------------------|-----------------------------------------------------|-----------------------------|-----------------------------------------------------|
| MMAB                                   | mir-199a-3p                                         | TMEM109                     | mir-23b , mir-23a                                   |
| SLC20A2                                | mir-199a-3p , mir-195 , mir-497                     | MAP3K5                      | mir-23b , mir-199a-3p , mir-23a                     |
| AUH                                    | mir-23b , mir-23a                                   | AGPAT3                      | mir-195 , mir-497                                   |
| KIAA0424 , ARHGEF9                     | mir-195 , mir-497                                   | DIP2C , AK093390 , KIAA0934 | mir-23b , mir-23a                                   |
| KIAA0591 , KIF1B                       | mir-195 , mir-497                                   | GC1 , SLC25A22              | mir-195 , mir-497                                   |
| KLHL3 , KIAA1129                       | mir-199a-5p , mir-199a-3p                           | LARP4                       | mir-199a-5p                                         |
| KCNK3                                  | mir-23b , mir-23a                                   | AGPAT9                      | mir-23b , mir-23a                                   |
| PDE11A                                 | mir-199a-3p                                         | CBFA2T3                     | mir-23b , mir-199a-3p , mir-23a , mir-195 , mir-497 |
| AKAP1                                  | mir-199a-5p                                         | AAACL1                      | mir-199a-5p                                         |
| HMG2                                   | mir-23b , mir-23a                                   | ARL3                        | mir-195 , mir-497                                   |
| ESRRA                                  | mir-195 , mir-497                                   | PRRG1 , PRGP1               | mir-23b , mir-23a                                   |
| UBR3 , KIAA2024                        | mir-195 , mir-497                                   |                             |                                                     |
| TMEM170B                               | mir-23b , mir-199a-3p , mir-23a , mir-195 , mir-497 |                             |                                                     |
| NTF3                                   | mir-21                                              |                             |                                                     |
| MYLK4                                  | mir-195 , mir-497                                   |                             |                                                     |
| LMBR1 , DIF14 , DKFZp547F222           | mir-21                                              |                             |                                                     |
| ZYG11B                                 | mir-23b , mir-23a , mir-21                          |                             |                                                     |
| NDUFA3                                 | mir-23b , mir-23a                                   |                             |                                                     |
| ASB15                                  | mir-23b , mir-23a                                   |                             |                                                     |
| SIPA1L2                                | mir-195 , mir-497                                   |                             |                                                     |
| nifS , NFS1                            | mir-195 , mir-497                                   |                             |                                                     |
| INSR                                   | mir-195 , mir-497                                   |                             |                                                     |
| LMO7 , AK123459 , KIAA0858             | mir-195 , mir-497                                   |                             |                                                     |
| DLL4                                   | mir-195 , mir-497                                   |                             |                                                     |
| FRAP1                                  | mir-199a-3p                                         |                             |                                                     |
| REEP1                                  | mir-23b , mir-23a                                   |                             |                                                     |
| TMCC1                                  | mir-195 , mir-497                                   |                             |                                                     |
| SYDE2                                  | mir-195 , mir-497                                   |                             |                                                     |
| LLGL2                                  | mir-199a-3p                                         |                             |                                                     |
| USP2                                   | mir-195 , mir-497                                   |                             |                                                     |
| RGS7BP                                 | mir-21                                              |                             |                                                     |
| TRIM63                                 | mir-23b , mir-23a                                   |                             |                                                     |
| DKFZp547K152 , TMEM63B , DKFZp434P0531 | mir-199a-5p                                         |                             |                                                     |
| CACNB2                                 | mir-199a-5p                                         |                             |                                                     |
| MST023 , KIAA0833 , CAMTA1             | mir-23b , mir-23a                                   |                             |                                                     |
| KIAA1675 , PRDM16                      | mir-199a-5p                                         |                             |                                                     |
| KIAA0366 , ADAMTS3                     | mir-199a-3p                                         |                             |                                                     |
| WDTC1 , KIAA1037                       | mir-199a-5p , mir-195 , mir-497                     |                             |                                                     |
| ERBB4                                  | mir-199a-5p , mir-23b , mir-199a-3p , mir-23a       |                             |                                                     |
| DEF8                                   | mir-195 , mir-497                                   |                             |                                                     |
| SCN4B                                  | mir-195 , mir-497                                   |                             |                                                     |
| BCL7A                                  | mir-195 , mir-497 , mir-21                          |                             |                                                     |
| UQCRB                                  | mir-199a-3p , mir-21                                |                             |                                                     |
| LMAN2L                                 | mir-195 , mir-497                                   |                             |                                                     |
| FAM73A                                 | mir-195 , mir-497                                   |                             |                                                     |
| LMOD3                                  | mir-23b , mir-23a                                   |                             |                                                     |
| RTF1                                   | mir-23b , mir-23a , mir-195 , mir-497               |                             |                                                     |
| CEP68 , KIAA0582                       | mir-195 , mir-497                                   |                             |                                                     |
| CPEB3                                  | mir-195 , mir-497 , mir-21                          |                             |                                                     |
| PPARA                                  | mir-21                                              |                             |                                                     |
| ZHX2                                   | mir-199a-3p                                         |                             |                                                     |
| SLC25A4                                | mir-23b , mir-23a                                   |                             |                                                     |
| CELSR1                                 | mir-199a-5p                                         |                             |                                                     |
| EGR1                                   | mir-199a-3p                                         |                             |                                                     |
| LIPE                                   | mir-195 , mir-497                                   |                             |                                                     |
| MAP3K5                                 | mir-23b , mir-199a-3p , mir-23a                     |                             |                                                     |
| CCNH                                   | mir-23b , mir-23a                                   |                             |                                                     |
| AGPAT3                                 | mir-195 , mir-497                                   |                             |                                                     |
| SIX4                                   | mir-23b , mir-23a , mir-195 , mir-497               |                             |                                                     |
| JHDM1D , KIAA1718                      | mir-23b , mir-23a , mir-21                          |                             |                                                     |
| HELZ                                   | mir-23b , mir-23a , mir-195 , mir-497               |                             |                                                     |

|                             |                                                        |  |  |
|-----------------------------|--------------------------------------------------------|--|--|
| UNG                         | mir-195 , mir-497                                      |  |  |
| JARID2                      | mir-23b , mir-23a , mir-195 ,<br>mir-497               |  |  |
| DIP2C , AK093390 , KIAA0934 | mir-23b , mir-23a                                      |  |  |
| GC1 , SLC25A22              | mir-195 , mir-497                                      |  |  |
| TRMT5                       | mir-23b , mir-23a , mir-21                             |  |  |
| LARP4                       | mir-199a-5p                                            |  |  |
| AGPAT9                      | mir-23b , mir-23a                                      |  |  |
| CBFA2T3                     | mir-23b , mir-199a-3p , mir-23a<br>, mir-195 , mir-497 |  |  |
| FNIP1                       | mir-23b , mir-23a                                      |  |  |
| AADACL1                     | mir-199a-5p                                            |  |  |
| LIFR                        | mir-21                                                 |  |  |
| ARL3                        | mir-195 , mir-497                                      |  |  |
| PRRG1 , PRGP1               | mir-23b , mir-23a                                      |  |  |
